# Supplementary material for: The Difference of Milk-Derived Extracellular Vesicles from Cow Colostrum and Mature Milk on miRNAs Expression and Protecting Intestinal Epithelial Cells against Lipopolysaccharide Damage
Source: MDPI journal article supplement (doi:10.3390/ijms25073880), 2024-03-30
Supplement: s1 [file s1]

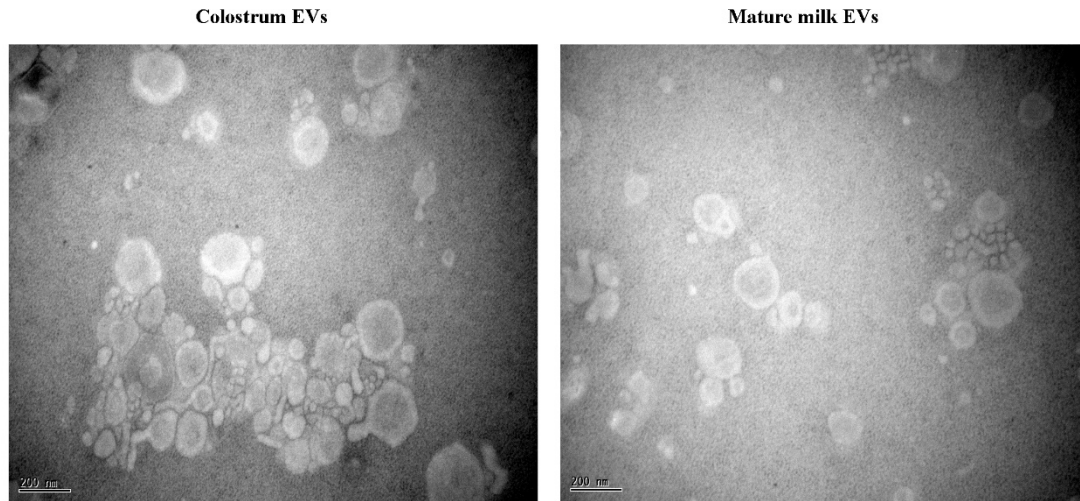

Figure S1. The TEM of colostrum and mature milk-derived EVs.

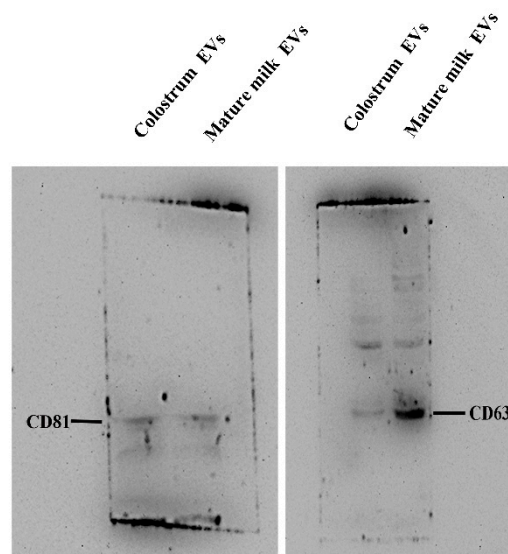

Figure S2. The colostrum and mature milk-derived EVs protein markers (CD81 and CD63) detected by Western blot.

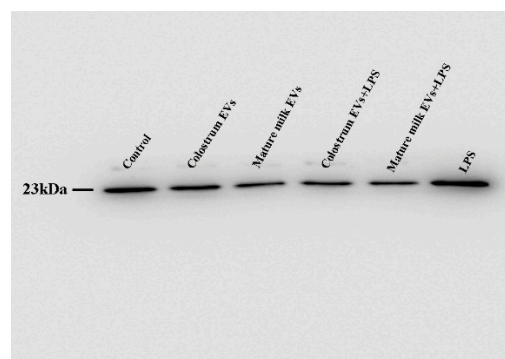

Figure S3. The Bax protein level in IEC-6 cells after colostrum EVs, mature milk EVs and LPS treatment detected by Western blot.

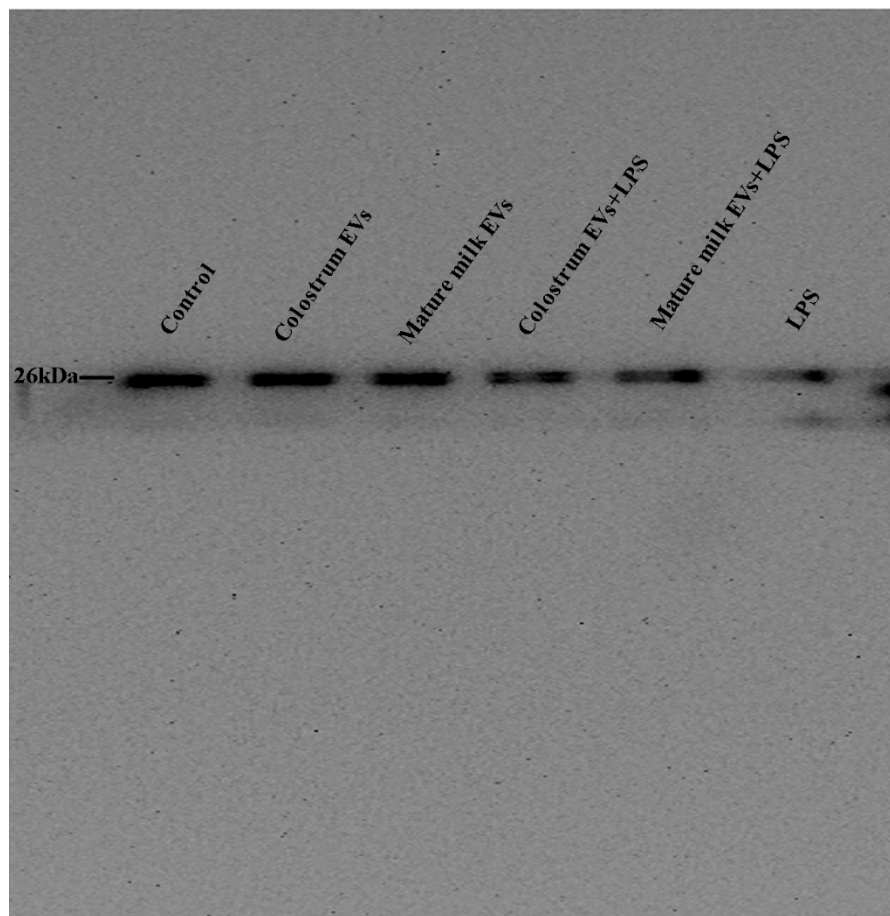

Figure S4. The Bcl2 protein level in IEC-6 cells after colostrum EVs, mature milk EVs and LPS treatment detected by Western blot.

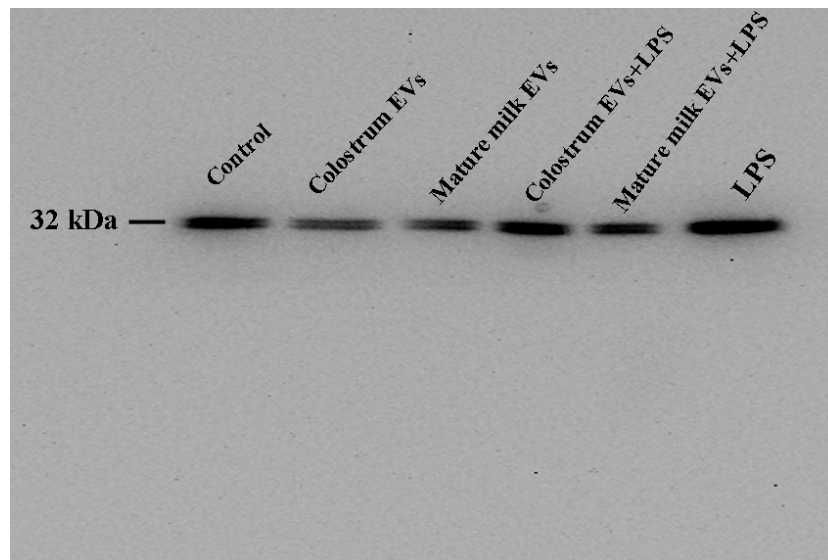

Figure S5. The Caspase-3 protein level in IEC-6 cells after colostrum EVs, mature milk EVs and LPS treatment detected by Western blot.

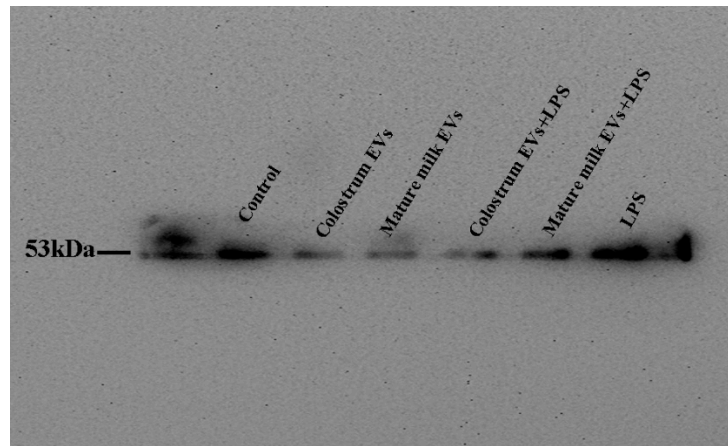

Figure S6. The P53 protein level in IEC-6 cells after colostrum EVs, mature milk EVs and LPS treatment detected by Western blot.

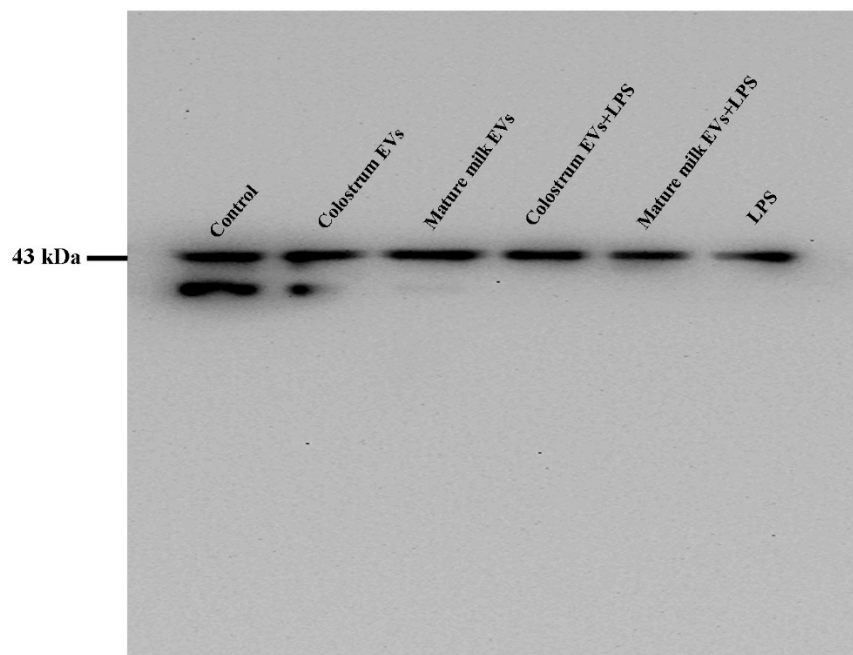

Figure S7. The  $\beta$ -actin protein level in IEC-6 cells after colostrum EVs, mature milk EVs and LPS treatment detected by Western blot.
