# Supplementary material for: The Difference of Milk-Derived Extracellular Vesicles from Cow Colostrum and Mature Milk on miRNAs Expression and Protecting Intestinal Epithelial Cells against Lipopolysaccharide Damage
Source: MDPI journal article supplement (doi:10.3390/ijms25073880), 2024-03-30
Supplement: s1 [file s1]

**Table S1.** Sequences of primer pairs for quantitative real-time PCR.

| <b>Primer</b>                   | <b>Forward</b>                 | <b>Reverse</b>             |
|---------------------------------|--------------------------------|----------------------------|
| <i>Bax</i>                      | AGGATGCGTCCACCAAGAA            | CAAAGTAGAAGAGGGCAACCAC     |
| <i>Caspase-3</i>                | TGACTGGAAAGCCGAAACTC           | GCAAGCCATCTCCTCATCAG       |
| <i>P53</i>                      | CGACCTATCCTTACCATCATC          | GGGTGAAATACTCTCCATCAAG     |
| <i>Bcl2</i>                     | GGCATCTGCACACCTGGAT            | ATCAAACAGAGGTTCGCATGCT     |
| <i>TNF-<math>\alpha</math></i>  | ACG GCA TGG ATC TCA AAG AC     | GTG GGT GAG GAG CAC GTA GT |
| <i>IL-6</i>                     | CTG CAA GAG ACT TCC ATC CAG TT | GAA GTA GGG AAG GCC GTG G  |
| <i>IL-1<math>\beta</math></i>   | CAG GCA GGC AGT ATC ACT CA     | TGT CCT CAT CCT GGA AGG TC |
| <i>Cdx2</i>                     | AGCCAAGTGAAAACCAGGAC           | AGTGAAACTCCTTCTCCAGCTC     |
| <i>MUC2</i>                     | TTT CAA GCA CCC CTG TAA CC     | AGG TCC TGG TGT TGA ACC TG |
| <i>TJP1</i>                     | ACT ATG ACC ATC GCC TAC GG     | GGG GAT GCT GAT TCT CAA AA |
| <i>CLDN1</i>                    | AGATACAGTGCAAAGTCTTCGA         | CAGGATGCCAATTACCATCAAG     |
| <i>OCLN</i>                     | CAGGATGCCAATTACCATCAAG         | GGGTTCACCTCCATTATGTACA     |
| <i>IGF1R</i>                    | GGCAAGTATGCGTGAAAGAATC         | CTAAAGGTTCGGAGGAATGAGG     |
| <i><math>\beta</math>-actin</i> | TGCTGTCCCTGTATGCCTCT           | CTTTGATGTCACGCACGATTT      |
| <b>bta-miR-362-3p</b>           | CGCCGGAACACACCTATTCA           |                            |
| <b>bta-miR-122</b>              | ACCACCGTGGAGTGTGACAA           |                            |
| <b>bta-miR-23b-3p</b>           | AACCGGATCACATTGCCAGG           |                            |
| <b>bta-miR-202</b>              | CGCGGCCTTCCTATGCATAT           |                            |
| <b>bta-miR-760-5p</b>           | AACAATCCCCTCAGTCCACCA          |                            |
| <b>bta-miR-32</b>               | ACGCCGTATTGCACATGACT           |                            |
| <b>bta-miR-21-3p</b>            | AACCGGAACAGCAGTCGATG           |                            |
| <b>bta-miR-503-5p</b>           | AACAAGTAGCAGCGGGAACAG          |                            |
| <b>bta-miR-377</b>              | ACCACCGATCACACAAAGGC           |                            |
| <b>bta-miR-211</b>              | ACGCCGTTCCCTTTGTCATC           |                            |
| <b>bta-miR-26a</b>              | ACGCCGTTCAAGTAATCCAGG          |                            |
| <b>bta-miR-138</b>              | AACACGCAGCTGGTGTGTG            |                            |
| <b>bta-miR-409b</b>             | AACAATGGGGTTCACCGAGC           |                            |
| <b>bta-miR-504</b>              | AACAAGAGACCCTGGTCTGCA          |                            |
| <b>bta-miR-193a-3p</b>          | AACCGGAACTGGCCTACAAAG          |                            |
| <b>bta-miR-125b</b>             | AACAAGTCCCTGAGACCCTAACTTG      |                            |
| <b>bta-miR-30d</b>              | AACAAGTGTAACATCCCCGACTG        |                            |
| <b>bta-miR-148a</b>             | AACAAGTCAGTGCACTACAGAACTT      |                            |
| <b>bta-let-7b</b>               | AACACGCTGAGGTAGTAGGTTGT        |                            |
| <b>bta-miR-15b</b>              | AACACGCTAGCAGCACATCAT          |                            |
| <b>U6</b>                       | GCTTCGGCAGCACATATACTAAAAT      |                            |
