# Supplementary material for: The Difference of Milk-Derived Extracellular Vesicles from Cow Colostrum and Mature Milk on miRNAs Expression and Protecting Intestinal Epithelial Cells against Lipopolysaccharide Damage
Source: Int J Mol Sci. 2024 Mar 30;25(7):3880. doi: 10.3390/ijms25073880 (PMC11011493; doi:10.3390/ijms25073880)
Supplement: Supplementary file 1 [file ijms-25-03880-s001.zip]

Archive with 7 entries (7 files):
- ijms-2762790-supplementary.pdf
- Table S1.pdf
- Table S2.xlsx
- Table S3.xlsx
- Table S4.xlsx
- Table S5.xlsx
- Table S6.xlsx
