# Supplementary material for: The Difference of Milk-Derived Extracellular Vesicles from Cow Colostrum and Mature Milk on miRNAs Expression and Protecting Intestinal Epithelial Cells against Lipopolysaccharide Damage
Source: Int J Mol Sci. 2024 Mar 30;25(7):3880. doi: 10.3390/ijms25073880 (PMC11011493; doi:10.3390/ijms25073880)
Supplement: Supplementary file 1 [file ijms-25-03880-s001.zip › Table S2.xlsx]

## Sheet: Colostrum_r1.catalog_stat
Table S2 miRNAs categorized intodifferent kinds of small RNA species
	Colostrum_exosomes r1		Colostrum_exosomes r2		Colostrum_exosomes r3
smallrna_class	smallrna_count	smallrna_percentage	smallrna_count	smallrna_percentage	smallrna_count	smallrna_percentage
total	23434037	100	21064669	100	24181069	100
intergenic	13228771	56.45	10022549	47.58	13197258	54.58
mature	2191133	9.35	1892806	8.99	1862378	7.7
Rfam other sncRNA	1360662	5.81	1947891	9.25	1838384	7.6
snRNA	10544	0.04	13953	0.07	18913	0.08
unmap	1558606	6.65	1842755	8.75	2261823	9.35
intron	24103	0.1	7450	0.04	9635	0.04
rRNA	210332	0.9	256795	1.22	278955	1.15
hairpin	2205789	9.41	1998145	9.49	1912947	7.91
snoRNA	11739	0.05	8674	0.04	9598	0.04
precursor	1038697	4.43	878885	4.17	729034	3.01
exon	3470	0.01	2205	0.01	3467	0.01
repeat	596860	2.55	1051560	4.99	1123284	4.65
tRNA	993331	4.24	1141001	5.42	935393	3.87
	Mature milk exosomes r1		Mature milk exosomes r2		Mature milk exosomes r3
smallrna_class	smallrna_count	smallrna_percentage	smallrna_count	smallrna_percentage	smallrna_count	smallrna_percentage
total	17164585	100	16626705	100	21140024	100
intergenic	6317295	36.8	6892378	41.45	9858401	46.63
mature	2492274	14.52	2451233	14.74	2055312	9.72
Rfam other sncRNA	963807	5.62	608128	3.66	1240558	5.87
snRNA	3525	0.02	2865	0.02	3836	0.02
unmap	1323792	7.71	1180525	7.1	1892525	8.95
intron	971	0.01	1945	0.01	2277	0.01
rRNA	253021	1.47	162636	0.98	304091	1.44
hairpin	2655084	15.47	2526403	15.19	2247774	10.63
snoRNA	11136	0.06	8840	0.05	15180	0.07
precursor	1627635	9.48	1659996	9.98	1243064	5.88
exon	441	0	566	0	386	0
repeat	752729	4.39	495935	2.98	1399338	6.62
tRNA	762875	4.44	635255	3.82	877282	4.15
