# Supplementary material for: The Difference of Milk-Derived Extracellular Vesicles from Cow Colostrum and Mature Milk on miRNAs Expression and Protecting Intestinal Epithelial Cells against Lipopolysaccharide Damage
Source: Int J Mol Sci. 2024 Mar 30;25(7):3880. doi: 10.3390/ijms25073880 (PMC11011493; doi:10.3390/ijms25073880)
Supplement: Supplementary file 1 [file ijms-25-03880-s001.zip › Table S3.xlsx]

## Sheet: 差异miRNA
Table S3 Differentially expressed exosomal miRNAs in colostrum exosomes and mature milk exosomes.
RNA ID	Type	Mature_milk_7f1f00ead000 Average Read Count	Colostrum_7f1f00ead000 Average Read Count	log2 (Colostrum / Mature_milk)	Pvalue(Colostrum / Mature_milk)	Qvalue (Colostrum / Mature_milk)	Colostrum Expression	Mature milk Expression
bta-miR-362-3p	miRNA	30.3333	0	-10.8611	1.80699e-20	6.99067e-20	0	1.86
bta-miR-6516	miRNA	12.3333	0	-9.52943	1.17999e-09	3.72732e-09	0	0.739
novel-bta-miR235-5p	miRNA	12.3333	0	-9.5216	1.17999e-09	3.72732e-09	0	0.735
bta-miR-1251	miRNA	6.66667	0	-8.66888	8.95602e-06	2.30212e-05	0	0.407
novel-bta-miR350-3p	miRNA	6	0	-8.49586	2.71366e-05	6.74892e-05	0	0.361
bta-miR-12048	miRNA	3.33333	0	-7.70044	0.00269755	0.00552493	0	0.208
novel-bta-miR342-5p	miRNA	3	0	-7.56224	0.00489949	0.0096231	0	0.189
bta-miR-122	miRNA	3271.33	20.6667	-7.55877	0	0	1.008	190.243
novel-bta-miR611-5p	miRNA	3	0	-7.50779	0.00489949	0.0096231	0	0.182
novel-bta-miR379-3p	miRNA	3	0	-7.49985	0.00489949	0.0096231	0	0.181
bta-miR-23b-3p	miRNA	1198	8	-7.47762	0	0	0.403	71.828
bta-miR-2284m	miRNA	2.66667	0	-7.29462	0.0089502	0.0168863	0	0.157
bta-miR-760-5p	miRNA	2.66667	0	-7.27612	0.0089502	0.0168863	0	0.155
novel-bta-miR19-3p	miRNA	2.66667	0	-7.26679	0.0089502	0.0168863	0	0.154
novel-bta-miR563-3p	miRNA	2.33333	0	-7.19967	0.0164503	0.0283805	0	0.147
bta-miR-7865	miRNA	2.33333	0	-7.10852	0.0164503	0.0283805	0	0.138
bta-miR-154a	miRNA	2.33333	0	-7.03342	0.0164503	0.0283805	0	0.131
novel-bta-miR233-5p	miRNA	2	0	-6.97728	0.0304343	0.0488735	0	0.126
novel-bta-miR532-5p	miRNA	2	0	-6.97728	0.0304343	0.0488735	0	0.126
novel-bta-miR59-3p	miRNA	2	0	-6.97728	0.0304343	0.0488735	0	0.126
bta-miR-12059	miRNA	2	0	-6.90689	0.0304343	0.0488735	0	0.12
bta-miR-2432	miRNA	2	0	-6.90689	0.0304343	0.0488735	0	0.12
bta-miR-6534	miRNA	2	0	-6.90689	0.0304343	0.0488735	0	0.12
novel-bta-miR641-5p	miRNA	2	0	-6.90689	0.0304343	0.0488735	0	0.12
bta-miR-2285bg	miRNA	2	0	-6.88264	0.0304343	0.0488735	0	0.118
novel-bta-miR374-3p	miRNA	2	0	-6.83289	0.0304343	0.0488735	0	0.114
novel-bta-miR5-5p	miRNA	204	4.33333	-5.70833	1.95314e-134	1.42486e-133	0.221	11.555
bta-miR-2285bk	miRNA	10.3333	0.333333	-5.20025	4.58381e-08	1.37156e-07	0.017	0.625
novel-bta-miR438-5p	miRNA	39.3333	1.33333	-5.14555	2.04758e-26	8.71359e-26	0.063	2.23
novel-bta-miR328-3p	miRNA	10	0.333333	-5.12686	7.97209e-08	2.3487e-07	0.017	0.594
bta-miR-193a-3p	miRNA	1133.33	42.3333	-5.10407	0	0	2.015	69.304
bta-miR-2285o	miRNA	44.6667	1.66667	-5.02181	2.00975e-29	8.79696e-29	0.08	2.599
novel-bta-miR603-3p	miRNA	9.33333	0.333333	-5.01057	2.42296e-07	7.057e-07	0.017	0.548
bta-miR-3141	miRNA	8	0.333333	-4.94251	2.28204e-06	6.19873e-06	0.016	0.491
bta-miR-2285aw	miRNA	7.33333	0.333333	-4.79116	7.07183e-06	1.83317e-05	0.016	0.443
bta-miR-2316	miRNA	7.33333	0.333333	-4.68072	7.07183e-06	1.83317e-05	0.017	0.436
novel-bta-miR590-5p	miRNA	5.33333	0.333333	-4.3443	0.000218433	0.000493569	0.016	0.325
bta-miR-2284n	miRNA	51.6667	3.33333	-4.27659	2.18252e-30	9.66364e-30	0.16	3.101
novel-bta-miR369-5p	miRNA	22.3333	1.66667	-4.07682	1.70325e-13	5.98482e-13	0.08	1.35
bta-miR-2285cl	miRNA	85.6667	6.66667	-3.99493	1.31211e-46	6.79104e-46	0.321	5.118
bta-miR-11981	miRNA	152.667	12.6667	-3.88423	7.07436e-80	4.30076e-79	0.616	9.096
bta-miR-2889	miRNA	9	0.666667	-3.8594	2.80931e-06	7.49802e-06	0.035	0.509
bta-miR-6120-5p	miRNA	4	0.333333	-3.84918	0.00220663	0.00454988	0.017	0.245
novel-bta-miR164-5p	miRNA	3.66667	0.333333	-3.83289	0.00394141	0.00788282	0.016	0.228
bta-miR-202	miRNA	4	0.333333	-3.7829	0.00220663	0.00454988	0.017	0.235
bta-miR-12058	miRNA	57.3333	5.33333	-3.76095	7.65094e-30	3.36817e-29	0.255	3.457
novel-bta-miR281-5p	miRNA	15.3333	1.66667	-3.55264	1.41421e-08	4.33314e-08	0.079	0.927
bta-miR-29b	miRNA	1150	124.667	-3.53353	0	0	6.058	70.15
novel-bta-miR396-3p	miRNA	178.333	20	-3.49696	3.85827e-82	2.38342e-81	0.958	10.827
bta-miR-22-3p	miRNA	37955	4178	-3.45707	0	0	203.795	2238.07
bta-miR-2285ba	miRNA	5	0.666667	-3.26497	0.00214197	0.00443446	0.031	0.298
novel-bta-miR600-5p	miRNA	49.3333	6.33333	-3.2312	1.89727e-22	7.58909e-22	0.316	2.958
novel-bta-miR57-3p	miRNA	49.3333	6.33333	-3.22907	1.89727e-22	7.58909e-22	0.308	2.888
novel-bta-miR29-5p	miRNA	7.33333	1	-3.18295	0.000221363	0.000498719	0.049	0.445
bta-miR-346	miRNA	9.33333	1.33333	-3.12601	3.98831e-05	9.76054e-05	0.063	0.55
bta-miR-193a	miRNA	398.667	58.3333	-3.09924	1.85796e-156	1.45224e-155	2.812	24.098
bta-miR-1777b	miRNA	24.6667	3.66667	-3.07597	4.25487e-11	1.41092e-10	0.178	1.501
bta-miR-2284p	miRNA	15.3333	2.33333	-3.02949	2.47133e-07	7.17061e-07	0.115	0.939
bta-miR-2339	miRNA	48.6667	7.66667	-2.94964	1.02923e-19	3.9029e-19	0.368	2.843
novel-bta-miR212-3p	miRNA	10.6667	1.66667	-2.94596	1.99395e-05	5.00776e-05	0.085	0.656
novel-bta-miR484-5p	miRNA	4	0.666667	-2.93455	0.0106669	0.0198563	0.031	0.237
novel-bta-miR472-5p	miRNA	37.6667	6	-2.91803	1.68286e-15	6.02369e-15	0.301	2.275
bta-miR-499	miRNA	6912	1124	-2.91684	0	0	54.301	410.076
bta-miR-1185	miRNA	10	1.66667	-2.91054	5.40647e-05	0.000129417	0.079	0.594
novel-bta-miR476-5p	miRNA	55.6667	9.33333	-2.90407	2.0029e-21	7.86781e-21	0.443	3.316
novel-bta-miR432-3p	miRNA	5.66667	1	-2.88004	0.00293239	0.00597397	0.047	0.346
novel-bta-miR189-5p	miRNA	3.66667	0.666667	-2.87869	0.0180296	0.0307245	0.031	0.228
bta-miR-2284w	miRNA	4	0.666667	-2.85316	0.0106669	0.0198563	0.031	0.223
bta-miR-29d-5p	miRNA	2884.33	500.667	-2.82759	0	0	24.249	172.141
bta-miR-29c	miRNA	781	139.333	-2.82203	5.22358e-265	5.00158e-264	6.667	47.146
novel-bta-miR543-5p	miRNA	362.333	64.6667	-2.79486	5.30421e-124	3.72755e-123	3.129	21.721
novel-bta-miR225-3p	miRNA	2841.67	477	-2.79343	0	0	23.183	160.721
novel-bta-miR515-5p	miRNA	3.66667	0.666667	-2.7885	0.0180296	0.0307245	0.033	0.228
bta-miR-2313-3p	miRNA	617.667	115.333	-2.75241	1.42248e-202	1.17164e-201	5.513	37.149
bta-miR-339b	miRNA	1089.33	209	-2.72788	0	0	10.067	66.692
novel-bta-miR295-5p	miRNA	35	7	-2.71383	2.21081e-12	7.69765e-12	0.33	2.165
bta-miR-1343-5p	miRNA	14.3333	2.66667	-2.71349	3.60766e-06	9.52921e-06	0.127	0.833
bta-miR-486	miRNA	66.3333	12.3333	-2.701	2.08449e-23	8.44825e-23	0.591	3.843
novel-bta-miR517-5p	miRNA	10.6667	2	-2.68579	6.78224e-05	0.000161341	0.099	0.636
novel-bta-miR55-5p	miRNA	181.333	34.3333	-2.67655	3.7094e-60	2.02957e-59	1.658	10.6
novel-bta-miR380-3p	miRNA	167.333	34.3333	-2.64968	5.08663e-52	2.68715e-51	1.631	10.235
novel-bta-miR74-3p	miRNA	3.33333	0.666667	-2.61566	0.030268	0.0491214	0.031	0.19
novel-bta-miR458-3p	miRNA	3881.67	806	-2.60959	0	0	38.604	235.612
novel-bta-miR624-5p	miRNA	80	16.3333	-2.5588	7.22763e-26	3.05876e-25	0.807	4.755
novel-bta-miR635-3p	miRNA	9	2	-2.51955	0.00070195	0.0015451	0.094	0.539
bta-miR-6715	miRNA	1310.67	293	-2.475	0	0	14.203	78.964
bta-miR-885	miRNA	1812	421.667	-2.46223	0	0	20.262	111.657
bta-miR-12014	miRNA	21.3333	5	-2.44184	3.82578e-07	1.08539e-06	0.24	1.304
bta-miR-197	miRNA	961.667	225	-2.42171	3.17365e-255	2.96465e-254	10.887	58.333
bta-miR-2370-5p	miRNA	4.66667	1	-2.40599	0.013002	0.0238267	0.05	0.265
bta-miR-323	miRNA	10	2.33333	-2.39657	0.000493216	0.00110147	0.113	0.595
novel-bta-miR412-3p	miRNA	5.66667	1.33333	-2.38187	0.0090161	0.0169273	0.066	0.344
bta-miR-196b	miRNA	1685.67	422.667	-2.35756	0	0	20.403	104.561
novel-bta-miR552-5p	miRNA	157.333	40.3333	-2.35105	2.53199e-39	1.21219e-38	1.903	9.709
bta-miR-135a	miRNA	1753	434.667	-2.34281	0	0	20.888	105.963
bta-miR-652	miRNA	50144.3	11913.3	-2.33071	0	0	590.223	2969.14
bta-miR-2447	miRNA	15.6667	4	-2.32643	3.32751e-05	8.16946e-05	0.192	0.963
bta-miR-365-3p	miRNA	486.333	121.333	-2.31587	2.06541e-121	1.43827e-120	5.82	28.977
bta-miR-2419-5p	miRNA	2073	490.667	-2.30953	0	0	24.26	120.262
novel-bta-miR608-5p	miRNA	324.667	81	-2.29966	1.08506e-81	6.64924e-81	3.944	19.418
novel-bta-miR128-3p	miRNA	3786.33	963	-2.27082	0	0	46.668	225.218
novel-bta-miR60-3p	miRNA	7.66667	2	-2.24476	0.00415151	0.00823849	0.096	0.455
bta-miR-2284x	miRNA	6039.67	1624.33	-2.18269	0	0	79.207	359.598
novel-bta-miR545-3p	miRNA	11	3	-2.17744	0.00083439	0.0018106	0.149	0.674
bta-miR-12064	miRNA	26.3333	7.33333	-2.17217	3.3769e-07	9.68803e-07	0.357	1.609
bta-miR-2285bo	miRNA	7.33333	2	-2.13422	0.00637162	0.0123561	0.1	0.439
bta-miR-326	miRNA	75.6667	21	-2.12715	4.47384e-18	1.66358e-17	1.023	4.469
bta-miR-133a	miRNA	20	5.66667	-2.12418	1.10445e-05	2.80134e-05	0.267	1.164
novel-bta-miR639-3p	miRNA	35	10	-2.074	7.35215e-09	2.27086e-08	0.495	2.08
novel-bta-miR352-3p	miRNA	7	2	-2.04775	0.00970737	0.0181362	0.104	0.429
bta-miR-664b	miRNA	1096	325.667	-2.04164	7.06883e-218	6.1531e-217	15.742	64.813
novel-bta-miR258-3p	miRNA	6	1.66667	-2.01668	0.014732	0.0263047	0.086	0.348
novel-bta-miR414-5p	miRNA	14.3333	4.33333	-2.0086	0.000372857	0.000835112	0.209	0.841
bta-miR-26c	miRNA	109816	34599.7	-1.99402	0	0	1632.27	6502.04
bta-miR-33a	miRNA	1086	347.333	-1.97694	6.12781e-194	4.99351e-193	16.699	65.737
bta-miR-2409	miRNA	23	6.66667	-1.97156	3.44286e-06	9.12537e-06	0.333	1.306
bta-let-7b	miRNA	106993	35378.3	-1.92034	0	0	1671.9	6328.37
bta-miR-11978	miRNA	128.667	42.3333	-1.91447	1.5488e-23	6.31055e-23	2.05	7.728
bta-miR-11976	miRNA	110	35.6667	-1.89518	8.53008e-21	3.31677e-20	1.748	6.502
bta-miR-6522	miRNA	410	139.667	-1.88585	2.15585e-67	1.22325e-66	6.714	24.813
bta-miR-148c	miRNA	52	17	-1.86923	1.67295e-10	5.38438e-10	0.802	2.93
novel-bta-miR455-5p	miRNA	56.6667	19.3333	-1.83967	1.19819e-10	3.90559e-10	0.945	3.386
bta-miR-2285av	miRNA	623	213.333	-1.83066	1.48963e-100	1.00978e-99	10.473	37.249
bta-miR-628	miRNA	23.3333	8.33333	-1.8089	7.18195e-05	0.000170321	0.401	1.405
bta-miR-141	miRNA	50300.7	18130.3	-1.79987	0	0	867.293	3019.81
bta-miR-10179-5p	miRNA	268.667	95	-1.79328	4.37854e-42	2.16384e-41	4.62	16.013
bta-miR-2904	miRNA	26	9.33333	-1.78969	3.02595e-05	7.50122e-05	0.446	1.542
bta-miR-375	miRNA	912	325	-1.78227	1.4488e-136	1.0671e-135	15.707	54.027
bta-miR-2285y	miRNA	604.333	211.667	-1.77455	6.17101e-94	4.00593e-93	10.573	36.177
bta-miR-4286	miRNA	229.333	84	-1.76845	5.02337e-34	2.31801e-33	4.075	13.883
novel-bta-miR21-3p	miRNA	6.66667	2.33333	-1.76407	0.0307206	0.0488216	0.116	0.394
bta-miR-1343-3p	miRNA	165.667	60.6667	-1.75287	4.74501e-25	1.98616e-24	2.922	9.848
bta-let-7a-3p	miRNA	4863.67	1883.67	-1.70115	0	0	90.594	294.575
bta-miR-17-3p	miRNA	120	47	-1.69415	1.82982e-16	6.73868e-16	2.264	7.326
bta-miR-382	miRNA	38.3333	13.6667	-1.68193	3.45541e-07	9.87629e-07	0.7	2.246
bta-miR-376b	miRNA	66	24.6667	-1.678	1.55834e-10	5.03665e-10	1.221	3.907
bta-miR-11975	miRNA	133.333	51	-1.64306	6.07321e-19	2.29166e-18	2.531	7.905
bta-miR-2403	miRNA	19.3333	7.66667	-1.64214	0.00110762	0.00237658	0.371	1.158
bta-miR-296-5p	miRNA	55	22.3333	-1.63849	8.23355e-08	2.41644e-07	1.067	3.323
novel-bta-miR170-3p	miRNA	125.667	50.6667	-1.63193	3.12066e-16	1.12756e-15	2.458	7.617
bta-miR-101	miRNA	66.6667	27	-1.62431	3.21266e-09	1.00445e-08	1.302	4.014
novel-bta-miR177-3p	miRNA	22	9	-1.6176	0.00077027	0.00169062	0.437	1.341
bta-miR-30b-5p	miRNA	37680.7	15751.3	-1.58515	0	0	759.675	2279.33
bta-miR-345-5p	miRNA	4248.33	1789.33	-1.55717	0	0	86.8	255.431
bta-miR-30e-5p	miRNA	1148.33	503	-1.53841	3.1432e-111	2.14973e-110	24.032	69.807
novel-bta-miR203-5p	miRNA	29	12	-1.53798	0.000137886	0.000319097	0.593	1.722
novel-bta-miR305-5p	miRNA	17.6667	7.66667	-1.53392	0.00492839	0.00963047	0.374	1.083
bta-miR-191b	miRNA	99.3333	41.6667	-1.52639	3.78077e-12	1.28714e-11	2.061	5.937
bta-miR-140	miRNA	511.667	221.667	-1.52423	6.07604e-52	3.18784e-51	10.763	30.958
bta-miR-190a	miRNA	152	66.3333	-1.52244	2.61121e-16	9.47954e-16	3.183	9.144
bta-miR-186	miRNA	7922.67	3546.33	-1.49384	0	0	169.998	478.778
bta-miR-374b	miRNA	22801.7	10186.7	-1.49174	0	0	490.778	1380.21
bta-miR-6525	miRNA	99.6667	44.3333	-1.4414	9.63119e-11	3.15278e-10	2.189	5.946
novel-bta-miR112-3p	miRNA	734.333	325	-1.43943	5.41715e-70	3.14359e-69	15.962	43.291
bta-miR-29a	miRNA	430.333	197.333	-1.43926	3.67095e-38	1.74655e-37	9.56	25.925
novel-bta-miR73-5p	miRNA	47.6667	21.3333	-1.4382	8.97152e-06	2.29839e-05	1.058	2.867
bta-miR-328	miRNA	166.667	75.3333	-1.41892	2.49111e-16	9.08662e-16	3.661	9.789
bta-miR-3600	miRNA	74072.3	33821.3	-1.41716	0	0	1648.73	4403.09
bta-miR-331-3p	miRNA	135.667	64	-1.40599	3.22768e-12	1.1087e-11	3.099	8.215
bta-miR-9851	miRNA	139.667	65.3333	-1.40488	8.32528e-13	2.91195e-12	3.19	8.447
novel-bta-miR573-5p	miRNA	30.6667	14.3333	-1.40356	0.000788054	0.00172471	0.694	1.836
bta-miR-411a	miRNA	2785.33	1284.67	-1.40351	3.01574e-233	2.68611e-232	62.679	165.814
bta-miR-660	miRNA	31647.7	14711	-1.39705	0	0	715.702	1884.88
novel-bta-miR76-3p	miRNA	26	12.6667	-1.37666	0.00365492	0.00738698	0.6	1.558
bta-miR-423-5p	miRNA	3152.67	1509	-1.3524	2.70432e-237	2.43707e-236	74.335	189.804
bta-miR-16a	miRNA	18957.3	9202.33	-1.34755	0	0	446.692	1136.74
bta-miR-30d	miRNA	47479.7	23043	-1.3443	0	0	1118.1	2838.93
bta-miR-125b	miRNA	7104	3484	-1.33811	0	0	170.011	429.824
novel-bta-miR402-3p	miRNA	57.6667	27.6667	-1.3232	9.38384e-06	2.39601e-05	1.36	3.403
novel-bta-miR357-5p	miRNA	23.3333	11	-1.32032	0.00382472	0.00770983	0.539	1.346
novel-bta-miR601-5p	miRNA	2040.67	1012.33	-1.29123	2.69752e-138	2.02578e-137	49.77	121.803
bta-miR-215	miRNA	48.3333	25	-1.23952	0.000331255	0.00074411	1.233	2.909
novel-bta-miR486-5p	miRNA	6825	3504.33	-1.23905	0	0	170.897	403.39
novel-bta-miR25-5p	miRNA	24.3333	12	-1.23298	0.00580492	0.0112857	0.581	1.368
bta-miR-148a	miRNA	57299.3	31161	-1.20478	0	0	1504.89	3468.82
bta-miR-2903	miRNA	37.6667	19.3333	-1.18941	0.00131922	0.00280701	0.949	2.161
bta-miR-11998	miRNA	46	24	-1.1838	0.000564356	0.00125303	1.196	2.717
novel-bta-miR394-3p	miRNA	179.667	98	-1.13061	3.78096e-10	1.20676e-09	4.733	10.363
bta-miR-2336	miRNA	532.333	307	-1.10916	1.20341e-21	4.75162e-21	14.778	31.88
bta-miR-1277	miRNA	33.6667	20	-1.08632	0.025351	0.0425852	0.965	2.048
bta-miR-15a	miRNA	2000.33	1176.67	-1.07445	6.79713e-70	3.91474e-69	57.053	120.149
novel-bta-miR257-3p	miRNA	3132.33	1776	-1.07193	1.97874e-128	1.40344e-127	87.372	183.676
bta-miR-92b	miRNA	513	304.667	-1.07112	2.42863e-18	9.11929e-18	14.665	30.812
bta-miR-193a-5p	miRNA	896.667	503.333	-1.04284	1.13258e-39	5.52584e-39	24.969	51.443
novel-bta-miR483-3p	miRNA	2453.67	1446.33	-1.03849	1.81294e-84	1.13829e-83	70.237	144.272
bta-miR-106a	miRNA	72.3333	181.667	1.00861	5.43877e-46	2.79604e-45	8.74	4.344
bta-miR-2419-3p	miRNA	2	5.33333	1.03395	0.0112176	0.0207553	0.258	0.126
novel-bta-miR502-5p	miRNA	2.33333	5.66667	1.06986	0.0140127	0.0251965	0.275	0.131
novel-bta-miR80-5p	miRNA	2	5	1.08525	0.0185494	0.0315052	0.243	0.115
bta-miR-10174-5p	miRNA	5	13	1.1113	9.77782e-05	0.000229749	0.633	0.293
bta-miR-15b	miRNA	2477.67	6597.33	1.11685	0	0	321.275	148.14
novel-bta-miR91-5p	miRNA	3.33333	9	1.13031	0.000901422	0.00194778	0.44	0.201
bta-miR-139	miRNA	624.667	1643.67	1.15512	0	0	79.663	35.771
bta-miR-2285de	miRNA	3.33333	9	1.16181	0.000901422	0.00194778	0.443	0.198
bta-miR-30b-3p	miRNA	17	47	1.16621	1.4065e-14	5.01105e-14	2.325	1.036
bta-miR-150	miRNA	127.333	343.667	1.18022	1.77647e-93	1.14351e-92	16.597	7.324
bta-miR-93	miRNA	5962.33	16695	1.1993	0	0	811.775	353.517
bta-miR-381	miRNA	3	8.66667	1.20799	0.00069823	0.00154134	0.432	0.187
novel-bta-miR345-5p	miRNA	1.66667	4.33333	1.20903	0.0244885	0.0412268	0.215	0.093
bta-miR-193b	miRNA	27.3333	77.6667	1.25298	8.87443e-24	3.63519e-23	3.718	1.56
bta-miR-146b	miRNA	330.667	932	1.27999	2.50716e-263	2.37097e-262	46.331	19.078
bta-miR-2299-3p	miRNA	97	294	1.29491	2.07093e-91	1.32195e-90	14.306	5.831
novel-bta-miR425-3p	miRNA	1150.33	3461	1.34165	0	0	168.727	66.574
bta-miR-331-5p	miRNA	75.3333	236.333	1.34985	1.66104e-76	9.9403e-76	11.373	4.463
novel-bta-miR473-5p	miRNA	1.33333	4.33333	1.35288	0.0107185	0.0198799	0.212	0.083
bta-miR-424-5p	miRNA	227.333	732	1.35954	4.92588e-239	4.49193e-238	35.442	13.812
novel-bta-miR534-3p	miRNA	4.33333	14	1.39682	4.80587e-06	1.25641e-05	0.682	0.259
bta-miR-10225a	miRNA	5	15.3333	1.41247	3.17056e-06	8.4328e-06	0.748	0.28
bta-miR-671	miRNA	58.6667	190	1.41904	7.76427e-64	4.34119e-63	9.263	3.465
novel-bta-miR131-3p	miRNA	1.66667	5.33333	1.43351	0.00496866	0.00968446	0.262	0.096
bta-miR-411c-3p	miRNA	3.66667	12.3333	1.43555	1.20081e-05	3.02572e-05	0.614	0.227
bta-miR-195	miRNA	17.6667	59.6667	1.49774	5.0644e-22	2.01002e-21	2.872	1.017
bta-miR-149-5p	miRNA	123.667	436	1.552	6.2165e-156	4.80994e-155	21.156	7.215
novel-bta-miR361-3p	miRNA	3.33333	12.6667	1.55399	2.80767e-06	7.51985e-06	0.599	0.204
bta-miR-2320-5p	miRNA	4.66667	17.3333	1.60056	5.72413e-08	1.7061e-07	0.837	0.276
bta-miR-130a	miRNA	2.33333	9.33333	1.69484	4.02965e-05	9.83029e-05	0.449	0.139
bta-miR-212	miRNA	1	3.66667	1.69632	0.0130533	0.0238636	0.175	0.054
bta-miR-2285t	miRNA	868	3446.67	1.69753	0	0	169.26	52.185
novel-bta-miR239-3p	miRNA	56.3333	231	1.7028	1.62106e-94	1.07046e-93	11.143	3.423
novel-bta-miR162-5p	miRNA	0.666667	2.66667	1.72935	0.0281904	0.0459933	0.126	0.038
novel-bta-miR143-3p	miRNA	181	724.667	1.73289	7.49252e-287	7.55167e-286	34.549	10.394
bta-miR-181c	miRNA	21.3333	87.3333	1.74687	8.27832e-37	3.91432e-36	4.192	1.249
bta-miR-10167-3p	miRNA	4.66667	18.3333	1.75629	1.10922e-08	3.41231e-08	0.901	0.267
bta-miR-497	miRNA	19.6667	82	1.80427	3.94666e-35	1.83221e-34	3.971	1.137
bta-miR-223	miRNA	682.667	2734.67	1.82277	0	0	134.043	37.891
bta-miR-665	miRNA	1.66667	7.66667	1.82343	8.9448e-05	0.000211473	0.361	0.102
novel-bta-miR240-5p	miRNA	1.66667	7.33333	1.83888	0.000161745	0.000371504	0.347	0.097
novel-bta-miR286-5p	miRNA	1.66667	7.33333	1.85997	0.000161745	0.000371504	0.363	0.1
novel-bta-miR37-5p	miRNA	0.666667	3	1.8679	0.0150139	0.0266219	0.146	0.04
bta-miR-455-5p	miRNA	3	12.6667	1.87289	1.04194e-06	2.89176e-06	0.608	0.166
bta-miR-1388-5p	miRNA	0.666667	2.66667	1.9386	0.0281904	0.0459933	0.138	0.036
bta-miR-95	miRNA	1	4.33333	1.94084	0.00392833	0.00788755	0.215	0.056
bta-miR-424-3p	miRNA	19	90	1.94402	7.31192e-42	3.59034e-41	4.448	1.156
bta-miR-2285al-5p	miRNA	2.66667	12.6667	1.94415	3.57711e-07	1.01861e-06	0.608	0.158
bta-miR-677	miRNA	1	4.33333	1.94555	0.00392833	0.00788755	0.207	0.054
bta-miR-204	miRNA	24	110	1.95138	1.07377e-49	5.59527e-49	5.31	1.373
bta-miR-130b	miRNA	3	14.3333	2.01436	5.79049e-08	1.71919e-07	0.707	0.175
bta-miR-2357	miRNA	2.33333	11.6667	2.05209	6.81309e-07	1.89776e-06	0.564	0.136
bta-miR-383	miRNA	4.33333	21.6667	2.06277	1.30246e-11	4.37579e-11	1.057	0.253
bta-miR-10225b	miRNA	1	5	2.06465	0.00114833	0.0024502	0.251	0.06
bta-miR-2285p	miRNA	1.33333	7.33333	2.09478	5.08468e-05	0.00012248	0.346	0.081
novel-bta-miR621-3p	miRNA	952.333	4809.67	2.09537	0	0	235.018	54.996
bta-miR-11982	miRNA	4	21	2.14424	1.34379e-11	4.49494e-11	1.03	0.233
bta-miR-3578	miRNA	2	10.3333	2.15959	2.33756e-06	6.3271e-06	0.487	0.109
novel-bta-miR616-3p	miRNA	1	5.33333	2.17834	0.000615667	0.00136301	0.258	0.057
bta-miR-1296	miRNA	7.33333	45	2.32462	4.73098e-25	1.99117e-24	2.144	0.428
bta-miR-450b	miRNA	0.666667	4.33333	2.34915	0.00113652	0.00243177	0.214	0.042
bta-miR-2285cp	miRNA	1.33333	8.66667	2.37377	4.17755e-06	1.09777e-05	0.426	0.082
novel-bta-miR581-5p	miRNA	0.333333	2	2.38466	0.030246	0.0491899	0.094	0.018
novel-bta-miR59-5p	miRNA	1	6.66667	2.39689	4.88703e-05	0.000118277	0.316	0.06
bta-miR-409b	miRNA	0.333333	2.33333	2.42786	0.0151163	0.026588	0.113	0.021
novel-bta-miR348-3p	miRNA	0.333333	2.33333	2.42786	0.0151163	0.026588	0.113	0.021
bta-miR-224	miRNA	35.6667	242.333	2.45943	1.4988e-133	1.08309e-132	11.802	2.146
novel-bta-miR236-5p	miRNA	0.333333	2.33333	2.45943	0.0151163	0.026588	0.11	0.02
bta-miR-10182-5p	miRNA	1.33333	9.33333	2.48864	1.17881e-06	3.25982e-06	0.449	0.08
bta-miR-11984	miRNA	1.33333	8.66667	2.49016	4.17755e-06	1.09777e-05	0.427	0.076
bta-miR-2285cr	miRNA	15.6667	109.667	2.50449	2.71321e-62	1.50603e-61	5.317	0.937
bta-miR-138	miRNA	3.66667	25.6667	2.51574	7.75358e-16	2.78838e-15	1.241	0.217
novel-bta-miR115-3p	miRNA	3	19.6667	2.52779	3.72689e-12	1.27446e-11	0.94	0.163
bta-miR-2382-5p	miRNA	0.333333	2.33333	2.53605	0.0151163	0.026588	0.116	0.02
novel-bta-miR39-5p	miRNA	0.333333	2.33333	2.53605	0.0151163	0.026588	0.116	0.02
novel-bta-miR262-5p	miRNA	1	6.66667	2.54579	4.88703e-05	0.000118277	0.327	0.056
bta-miR-12031	miRNA	1.33333	9	2.55837	2.22155e-06	6.0559e-06	0.431	0.073
bta-miR-301a	miRNA	0.333333	2.33333	2.61143	0.0151163	0.026588	0.11	0.018
bta-miR-20b	miRNA	124.333	972.333	2.66532	0	0	46.365	7.309
bta-miR-3431	miRNA	76	602	2.69842	0	0	29.235	4.504
bta-miR-7857-3p	miRNA	8.66667	71	2.72063	1.33719e-43	6.65122e-43	3.454	0.524
bta-miR-2284ac	miRNA	7.33333	58.3333	2.72288	9.71002e-36	4.56312e-35	2.819	0.427
bta-miR-2284h-5p	miRNA	0.333333	2.66667	2.80735	0.00755993	0.0144412	0.126	0.018
bta-miR-2285dc	miRNA	5.33333	48.3333	2.85415	2.7089e-31	1.21346e-30	2.35	0.326
bta-miR-7857-5p	miRNA	29.6667	265.667	2.89693	3.37869e-163	2.66812e-162	13.057	1.753
bta-miR-10164-3p	miRNA	0.666667	6.33333	2.93074	2.18044e-05	5.44044e-05	0.305	0.04
bta-miR-2285db	miRNA	6.66667	68	3.03685	5.89539e-45	2.99064e-44	3.291	0.401
novel-bta-miR482-3p	miRNA	0.333333	3.33333	3.04231	0.00190011	0.00395513	0.173	0.021
novel-bta-miR387-3p	miRNA	0.666667	6.66667	3.05889	1.12456e-05	2.84295e-05	0.325	0.039
novel-bta-miR171-3p	miRNA	1	10.3333	3.10434	3.90409e-08	1.17276e-07	0.516	0.06
bta-miR-504	miRNA	0.333333	3.66667	3.11548	0.000955748	0.00205647	0.182	0.021
bta-miR-425-3p	miRNA	31.3333	332	3.14011	1.41642e-214	1.21907e-213	16.089	1.825
bta-miR-181d	miRNA	107.333	1247.33	3.24503	0	0	60.498	6.381
bta-miR-1271	miRNA	6.33333	99.3333	3.60037	9.24505e-72	5.48969e-71	4.706	0.388
bta-miR-218	miRNA	55	874	3.70085	0	0	42.107	3.238
bta-miR-3596	miRNA	4664	73741.7	3.73447	0	0	3640.5	273.51
novel-bta-miR423-5p	miRNA	1	17	3.94382	8.42084e-14	2.97252e-13	0.831	0.054
novel-bta-miR363-5p	miRNA	0.666667	12.6667	4.0851	8.11732e-11	2.66861e-10	0.611	0.036
novel-bta-miR595-3p	miRNA	1.66667	41.6667	4.28824	4.71864e-33	2.16436e-32	2.032	0.104
novel-bta-miR423-3p	miRNA	1	34.3333	4.90173	4.52543e-28	1.96959e-27	1.674	0.056
bta-miR-135b	miRNA	0.666667	24.3333	4.91572	2.08425e-20	8.02279e-20	1.147	0.038
bta-miR-455-3p	miRNA	15	546.667	4.99255	0	0	27.028	0.849
bta-miR-2285bc	miRNA	0.666667	29.3333	5.15583	2.36588e-24	9.74334e-24	1.426	0.04
bta-miR-211	miRNA	0.666667	44.3333	5.89684	1.06377e-35	4.96857e-35	2.145	0.036
bta-miR-2323	miRNA	0	1.66667	6.30378	0.0281019	0.0464424	0.079	0
bta-miR-2410	miRNA	0	1.66667	6.30378	0.0281019	0.0464424	0.079	0
bta-miR-377	miRNA	0	1.66667	6.30378	0.0281019	0.0464424	0.079	0
novel-bta-miR471-3p	miRNA	0	1.66667	6.30378	0.0281019	0.0464424	0.079	0
novel-bta-miR507-3p	miRNA	0	1.66667	6.30378	0.0281019	0.0464424	0.079	0
novel-bta-miR523-5p	miRNA	0	1.66667	6.30378	0.0281019	0.0464424	0.079	0
bta-miR-2398	miRNA	0	1.66667	6.32193	0.0281019	0.0464424	0.08	0
novel-bta-miR34-5p	miRNA	0	1.66667	6.32193	0.0281019	0.0464424	0.08	0
novel-bta-miR76-5p	miRNA	0	1.66667	6.40939	0.0281019	0.0464424	0.085	0
novel-bta-miR585-3p	miRNA	0	1.66667	6.42626	0.0281019	0.0464424	0.086	0
novel-bta-miR31-3p	miRNA	0	2	6.55459	0.0135788	0.0246479	0.094	0
bta-miR-26a	miRNA	591.667	67966.3	6.59188	0	0	3362.93	34.863
novel-bta-miR640-5p	miRNA	0	2	6.61471	0.0135788	0.0246479	0.097	0
bta-miR-10175-5p	miRNA	0	2	6.67243	0.0135788	0.0246479	0.102	0
bta-miR-664a	miRNA	0	2	6.70044	0.0135788	0.0246479	0.104	0
novel-bta-miR158-3p	miRNA	0	2	6.70044	0.0135788	0.0246479	0.104	0
bta-miR-3533	miRNA	0	2.33333	6.78136	0.00663701	0.0128059	0.11	0
novel-bta-miR129-5p	miRNA	0	2.33333	6.78136	0.00663701	0.0128059	0.11	0
bta-miR-7180	miRNA	0	2.33333	6.85798	0.00663701	0.0128059	0.116	0
bta-miR-2458	miRNA	0	2.66667	6.97728	0.00327757	0.00665064	0.126	0
bta-miR-147	miRNA	0	2.66667	7.04439	0.00327757	0.00665064	0.132	0
novel-bta-miR307-3p	miRNA	0	3	7.15987	0.0016338	0.00342873	0.143	0
novel-bta-miR41-5p	miRNA	0	3	7.21917	0.0016338	0.00342873	0.149	0
bta-miR-503-5p	miRNA	0	3	7.2384	0.0016338	0.00342873	0.151	0
novel-bta-miR226-3p	miRNA	0	3.33333	7.43463	0.000821452	0.00178759	0.173	0
novel-bta-miR8-3p	miRNA	0	4	7.56986	0.000212573	0.000482461	0.19	0
bta-miR-11989	miRNA	0	4	7.59246	0.000212573	0.000482461	0.193	0
novel-bta-miR271-5p	miRNA	0	4.33333	7.67243	0.000109298	0.00025525	0.204	0
bta-miR-11979	miRNA	0	4.33333	7.70736	0.000109298	0.00025525	0.209	0
bta-miR-2285bx	miRNA	0	4.33333	7.70736	0.000109298	0.00025525	0.209	0
bta-miR-21-3p	miRNA	0	4.66667	7.83289	5.65669e-05	0.000134985	0.228	0
novel-bta-miR475-5p	miRNA	1.33333	363.667	7.88924	4.64052e-242	4.2827e-241	17.544	0.074
bta-miR-32	miRNA	0	6.66667	8.29462	1.22542e-06	3.37652e-06	0.314	0
novel-bta-miR113-3p	miRNA	0	7	8.36632	6.58474e-07	1.84421e-06	0.33	0
novel-bta-miR27-3p	miRNA	0	7	8.36632	6.58474e-07	1.84421e-06	0.33	0
bta-miR-2474	miRNA	0	10.3333	8.97728	1.64826e-09	5.17446e-09	0.504	0
bta-miR-10174-3p	miRNA	6.33333	4149.67	9.04592	0	0	201.381	0.381
novel-bta-miR6-5p	miRNA	0	32.6667	10.6221	2.0611e-24	8.53407e-24	1.576	0
bta-miR-2284aa	miRNA	0	94.3333	12.1199	8.4087e-57	4.56813e-56	4.451	0
