# Supplementary material for: The Difference of Milk-Derived Extracellular Vesicles from Cow Colostrum and Mature Milk on miRNAs Expression and Protecting Intestinal Epithelial Cells against Lipopolysaccharide Damage
Source: Int J Mol Sci. 2024 Mar 30;25(7):3880. doi: 10.3390/ijms25073880 (PMC11011493; doi:10.3390/ijms25073880)
Supplement: Supplementary file 1 [file ijms-25-03880-s001.zip › Table S4.xlsx]

## Sheet: go分类基因
Table S4. GO enrichment analysis of the targeted genes of differentially expressed miRNAs in colostrum and mature milk exosomes.
RNA ID	Symbol	Type	GO_CFP Term	GO_CFP Term Level1	GO_CFP Term Level2	Colostrum Expression	Nonestrus Expression	log2 (Colostrum / Mature_milk)
NM_001001133.2	AGO3	mRNA	[Cellular Component]---GO:0000794///condensed nuclear chromosome+++GO:0000932///P-body+++GO:0005654///nucleoplasm+++GO:0005737///cytoplasm+++GO:0016442///RISC complex+++GO:0036464///cytoplasmic ribonucleoprotein granule+++GO:0070578///RISC-loading complex+++[Molecular Function]---GO:0003676///nucleic acid binding+++GO:0003723///RNA binding+++GO:0003725///double-stranded RNA binding+++GO:0003727//…	cellular_component+++molecular_function+++biological_process	[Cellular Component]---membrane-enclosed lumen+++organelle+++cell part+++cell+++organelle part+++protein-containing complex+++[Molecular Function]---binding+++catalytic activity+++[Biological Process]---metabolic process+++regulation of biological process+++negative regulation of biological process+++cellular process+++biological regulation+++positive regulation of biological process+++cellular c…
NM_001001137.1	FYTTD1	mRNA	[Cellular Component]---GO:0005634///nucleus+++GO:0005654///nucleoplasm+++GO:0016607///nuclear speck+++[Molecular Function]---GO:0003723///RNA binding+++GO:0003729///mRNA binding+++[Biological Process]---GO:0006406///mRNA export from nucleus+++GO:0051028///mRNA transport	cellular_component+++molecular_function+++biological_process	[Cellular Component]---organelle+++cell part+++cell+++membrane-enclosed lumen+++organelle part+++[Molecular Function]---binding+++[Biological Process]---metabolic process+++localization
NM_001001140.1	GDF6	mRNA	[Cellular Component]---GO:0005576///extracellular region+++GO:0005615///extracellular space+++[Molecular Function]---GO:0005125///cytokine activity+++GO:0008083///growth factor activity+++GO:0042802///identical protein binding+++[Biological Process]---GO:0006915///apoptotic process+++GO:0007275///multicellular organism development+++GO:0010862///positive regulation of pathway-restricted SMAD prot…	cellular_component+++molecular_function+++biological_process	[Cellular Component]---extracellular region+++extracellular region part+++[Molecular Function]---binding+++molecular function regulator+++[Biological Process]---cellular process+++developmental process+++multicellular organismal process+++metabolic process+++regulation of biological process+++response to stimulus+++signaling+++positive regulation of biological process+++biological regulation
NM_001001147.1	CCNT1	mRNA	[Cellular Component]---GO:0005634///nucleus+++GO:0005654///nucleoplasm+++GO:0008024///cyclin/CDK positive transcription elongation factor complex+++GO:0042025///host cell nucleus+++[Molecular Function]---GO:0000976///transcription regulatory region sequence-specific DNA binding+++GO:0003677///DNA binding+++GO:0003682///chromatin binding+++GO:0008134///transcription factor binding+++GO:0016538///c…	cellular_component+++molecular_function+++biological_process	[Cellular Component]---organelle+++cell part+++cell+++membrane-enclosed lumen+++organelle part+++protein-containing complex+++other organism part+++other organism+++[Molecular Function]---binding+++molecular function regulator+++[Biological Process]---metabolic process+++regulation of biological process+++cellular process+++biological regulation+++multi-organism process+++positive regulation of b…
NM_001001148.1	GKN1	mRNA	[Cellular Component]---GO:0005615///extracellular space+++[Biological Process]---GO:0042127///regulation of cell proliferation	cellular_component+++biological_process	[Cellular Component]---extracellular region part+++extracellular region+++[Biological Process]---regulation of biological process+++cell proliferation+++cellular process+++biological regulation
NM_001001158.1	LY75	mRNA	[Cellular Component]---GO:0009897///external side of plasma membrane+++GO:0016020///membrane+++GO:0016021///integral component of membrane+++[Molecular Function]---GO:0038023///signaling receptor activity	cellular_component+++molecular_function	[Cellular Component]---membrane+++cell part+++membrane part+++cell+++[Molecular Function]---molecular transducer activity
NM_001001161.2	USF1	mRNA	[Cellular Component]---GO:0000790///nuclear chromatin+++GO:0005634///nucleus+++GO:0005654///nucleoplasm+++GO:0005667///transcription factor complex+++[Molecular Function]---GO:0000981///DNA-binding transcription factor activity, RNA polymerase II-specific+++GO:0003677///DNA binding+++GO:0003700///DNA-binding transcription factor activity+++GO:0019899///enzyme binding+++GO:0019901///protein kinase…	cellular_component+++molecular_function+++biological_process	[Cellular Component]---membrane-enclosed lumen+++organelle+++cell part+++cell+++organelle part+++protein-containing complex+++[Molecular Function]---transcription regulator activity+++binding+++[Biological Process]---metabolic process+++regulation of biological process+++response to stimulus+++positive regulation of biological process+++cellular process+++biological regulation+++multi-organism pr…
NM_001001168.1	SEPTIN7	mRNA	[Cellular Component]---GO:0000775///chromosome, centromeric region+++GO:0000776///kinetochore+++GO:0000777///condensed chromosome kinetochore+++GO:0005694///chromosome+++GO:0005737///cytoplasm+++GO:0005819///spindle+++GO:0005856///cytoskeleton+++GO:0005929///cilium+++GO:0005930///axoneme+++GO:0005940///septin ring+++GO:0015630///microtubule cytoskeleton+++GO:0016324///apical plasma membrane+++GO:…	cellular_component+++molecular_function+++biological_process	[Cellular Component]---organelle+++cell part+++cell+++organelle part+++protein-containing complex+++membrane+++membrane part+++[Molecular Function]---binding+++catalytic activity+++[Biological Process]---cellular process+++reproduction+++reproductive process+++multicellular organismal process+++multi-organism process+++developmental process+++regulation of biological process+++cellular component …
NM_001001169.1	MAP1LC3B	mRNA	[Cellular Component]---GO:0000421///autophagosome membrane+++GO:0005737///cytoplasm+++GO:0005776///autophagosome+++GO:0005829///cytosol+++GO:0005856///cytoskeleton+++GO:0005874///microtubule+++GO:0005930///axoneme+++GO:0012505///endomembrane system+++GO:0016020///membrane+++GO:0031090///organelle membrane+++GO:0031410///cytoplasmic vesicle+++GO:0044754///autolysosome+++[Molecular Function]---GO:0…	cellular_component+++molecular_function+++biological_process	[Cellular Component]---membrane+++organelle+++cell part+++cell+++organelle part+++supramolecular complex+++[Molecular Function]---binding+++[Biological Process]---metabolic process+++cellular process+++cellular component organization or biogenesis+++response to stimulus+++regulation of biological process+++localization+++multicellular organismal process+++positive regulation of biological process…
NM_001001173.2	OPLAH	mRNA	[Cellular Component]---GO:0005829///cytosol+++[Molecular Function]---GO:0000166///nucleotide binding+++GO:0003824///catalytic activity+++GO:0005524///ATP binding+++GO:0016787///hydrolase activity+++GO:0017168///5-oxoprolinase (ATP-hydrolyzing) activity+++[Biological Process]---GO:0006749///glutathione metabolic process	cellular_component+++molecular_function+++biological_process	[Cellular Component]---cell part+++cell+++[Molecular Function]---binding+++catalytic activity+++[Biological Process]---metabolic process+++cellular process
NM_001001442.1	SLC5A10	mRNA	[Cellular Component]---GO:0005886///plasma membrane+++GO:0016020///membrane+++GO:0016021///integral component of membrane+++[Molecular Function]---GO:0005412///glucose:sodium symporter activity+++GO:0022857///transmembrane transporter activity+++[Biological Process]---GO:0006811///ion transport+++GO:0006814///sodium ion transport+++GO:0055085///transmembrane transport+++GO:1904659///glucose trans…	cellular_component+++molecular_function+++biological_process	[Cellular Component]---membrane+++cell part+++cell+++membrane part+++[Molecular Function]---transporter activity+++[Biological Process]---localization
NM_001001526.2	PDE6A	mRNA	[Cellular Component]---GO:0005623///cell+++GO:0005886///plasma membrane+++GO:0016020///membrane+++GO:0042622///photoreceptor outer segment membrane+++GO:0097381///photoreceptor disc membrane+++[Molecular Function]---GO:0004114///3',5'-cyclic-nucleotide phosphodiesterase activity+++GO:0008081///phosphoric diester hydrolase activity+++GO:0016787///hydrolase activity+++GO:0046872///metal ion binding…	cellular_component+++molecular_function+++biological_process	[Cellular Component]---cell+++membrane+++cell part+++organelle+++membrane part+++organelle part+++[Molecular Function]---catalytic activity+++binding+++[Biological Process]---regulation of biological process+++response to stimulus+++signaling+++cellular process+++biological regulation+++multicellular organismal process+++developmental process
NM_001001601.1	CDH5	mRNA	[Cellular Component]---GO:0005654///nucleoplasm+++GO:0005886///plasma membrane+++GO:0005911///cell-cell junction+++GO:0005912///adherens junction+++GO:0005923///bicellular tight junction+++GO:0009897///external side of plasma membrane+++GO:0009986///cell surface+++GO:0016020///membrane+++GO:0016021///integral component of membrane+++GO:0016342///catenin complex+++GO:0030054///cell junction+++GO:0…	cellular_component+++molecular_function+++biological_process	[Cellular Component]---membrane-enclosed lumen+++organelle+++cell part+++cell+++organelle part+++membrane+++cell junction+++membrane part+++protein-containing complex+++[Molecular Function]---binding+++[Biological Process]---developmental process+++cellular process+++cellular component organization or biogenesis+++metabolic process+++regulation of biological process+++biological regulation+++mult…
NM_001001853.1	NGB	mRNA	[Cellular Component]---GO:0043204///perikaryon+++[Molecular Function]---GO:0005344///oxygen carrier activity+++GO:0019825///oxygen binding+++GO:0020037///heme binding+++GO:0046872///metal ion binding+++[Biological Process]---GO:0015671///oxygen transport	cellular_component+++molecular_function+++biological_process	[Cellular Component]---cell part+++cell+++[Molecular Function]---molecular carrier activity+++binding+++[Biological Process]---response to stimulus+++localization
NM_001001854.2	CLDN1	mRNA	[Cellular Component]---GO:0005886///plasma membrane+++GO:0005887///integral component of plasma membrane+++GO:0005911///cell-cell junction+++GO:0005923///bicellular tight junction+++GO:0016020///membrane+++GO:0016021///integral component of membrane+++GO:0016323///basolateral plasma membrane+++GO:0016324///apical plasma membrane+++GO:0016328///lateral plasma membrane+++GO:0030054///cell junction+…	cellular_component+++molecular_function+++biological_process	[Cellular Component]---membrane+++cell part+++cell+++membrane part+++cell junction+++protein-containing complex+++[Molecular Function]---hijacked molecular function+++structural molecule activity+++binding+++[Biological Process]---biological adhesion+++regulation of biological process+++locomotion+++localization+++positive regulation of biological process+++cellular process+++biological regulatio…
NM_001002763.1	CDH1	mRNA	[Cellular Component]---GO:0005737///cytoplasm+++GO:0005768///endosome+++GO:0005794///Golgi apparatus+++GO:0005802///trans-Golgi network+++GO:0005886///plasma membrane+++GO:0005912///adherens junction+++GO:0009898///cytoplasmic side of plasma membrane+++GO:0009986///cell surface+++GO:0015629///actin cytoskeleton+++GO:0016020///membrane+++GO:0016021///integral component of membrane+++GO:0016328///l…	cellular_component+++molecular_function+++biological_process	[Cellular Component]---cell part+++cell+++organelle+++organelle part+++membrane+++cell junction+++membrane part+++protein-containing complex+++[Molecular Function]---binding+++[Biological Process]---developmental process+++cellular process+++cellular component organization or biogenesis+++biological adhesion+++multicellular organismal process+++metabolic process+++regulation of biological process…
NM_001002883.2	ST3GAL6	mRNA	[Cellular Component]---GO:0000139///Golgi membrane+++GO:0005575///cellular_component+++GO:0005794///Golgi apparatus+++GO:0016020///membrane+++GO:0016021///integral component of membrane+++[Molecular Function]---GO:0008373///sialyltransferase activity+++GO:0016740///transferase activity+++GO:0016757///transferase activity, transferring glycosyl groups+++GO:0052798///beta-galactoside alpha-2,3-sial…	cellular_component+++molecular_function+++biological_process	[Cellular Component]---membrane+++organelle+++cell part+++cell+++organelle part+++cellular_component+++membrane part+++[Molecular Function]---catalytic activity+++[Biological Process]---metabolic process+++cellular process+++response to stimulus
NM_001002886.1	GYPC	mRNA	[Cellular Component]---GO:0016020///membrane+++GO:0016021///integral component of membrane+++GO:0030863///cortical cytoskeleton	cellular_component	[Cellular Component]---membrane+++membrane part+++organelle+++cell part+++cell
NM_001002889.1	NOD2	mRNA	[Cellular Component]---GO:0005737///cytoplasm+++GO:0005794///Golgi apparatus+++GO:0005829///cytosol+++GO:0005856///cytoskeleton+++GO:0005886///plasma membrane+++GO:0009986///cell surface+++GO:0016020///membrane+++GO:0016323///basolateral plasma membrane+++GO:0031982///vesicle+++GO:0032991///protein-containing complex+++[Molecular Function]---GO:0000166///nucleotide binding+++GO:0003779///actin bi…	cellular_component+++molecular_function+++biological_process	[Cellular Component]---cell part+++cell+++organelle+++membrane+++membrane part+++protein-containing complex+++[Molecular Function]---binding+++[Biological Process]---immune system process+++response to stimulus+++multicellular organismal process+++localization+++cellular process+++regulation of biological process+++positive regulation of biological process+++biological regulation+++multi-organism…
NM_001002890.1	KLRD1	mRNA	[Cellular Component]---GO:0005886///plasma membrane+++GO:0016020///membrane+++GO:0016021///integral component of membrane+++[Molecular Function]---GO:0030246///carbohydrate binding	cellular_component+++molecular_function	[Cellular Component]---membrane+++cell part+++cell+++membrane part+++[Molecular Function]---binding
NM_001007808.1	CAV2	mRNA	[Cellular Component]---GO:0000139///Golgi membrane+++GO:0002080///acrosomal membrane+++GO:0002095///caveolar macromolecular signaling complex+++GO:0005634///nucleus+++GO:0005737///cytoplasm+++GO:0005794///Golgi apparatus+++GO:0005886///plasma membrane+++GO:0005887///integral component of plasma membrane+++GO:0005901///caveola+++GO:0005925///focal adhesion+++GO:0016020///membrane+++GO:0030133///tr…	cellular_component+++molecular_function+++biological_process	[Cellular Component]---membrane+++organelle+++cell part+++cell+++organelle part+++membrane part+++protein-containing complex+++cell junction+++[Molecular Function]---binding+++[Biological Process]---regulation of biological process+++cell proliferation+++negative regulation of biological process+++cellular process+++biological regulation+++positive regulation of biological process+++localization+…
NM_001007814.2	NLRP5	mRNA	[Cellular Component]---GO:0005634///nucleus+++GO:0005730///nucleolus+++GO:0005737///cytoplasm+++GO:0005739///mitochondrion+++GO:0005829///cytosol+++GO:0005938///cell cortex+++GO:0042585///germinal vesicle+++GO:0048471///perinuclear region of cytoplasm+++[Molecular Function]---GO:0000166///nucleotide binding+++GO:0005524///ATP binding	cellular_component+++molecular_function	[Cellular Component]---organelle+++cell part+++cell+++membrane-enclosed lumen+++organelle part+++[Molecular Function]---binding
NM_001008663.1	KRT5	mRNA	[Cellular Component]---GO:0005737///cytoplasm+++GO:0005882///intermediate filament+++GO:0005886///plasma membrane+++GO:0045095///keratin filament+++[Molecular Function]---GO:0097110///scaffold protein binding+++[Biological Process]---GO:0030855///epithelial cell differentiation+++GO:0050680///negative regulation of epithelial cell proliferation	cellular_component+++molecular_function+++biological_process	[Cellular Component]---cell part+++cell+++organelle+++supramolecular complex+++organelle part+++membrane+++[Molecular Function]---binding+++[Biological Process]---developmental process+++cellular process+++regulation of biological process+++cell proliferation+++negative regulation of biological process+++biological regulation
NM_001008668.2	ST6GAL2	mRNA	[Cellular Component]---GO:0005794///Golgi apparatus+++GO:0016020///membrane+++GO:0016021///integral component of membrane+++GO:0032580///Golgi cisterna membrane+++[Molecular Function]---GO:0003824///catalytic activity+++GO:0003835///beta-galactoside alpha-2,6-sialyltransferase activity+++GO:0008373///sialyltransferase activity+++GO:0016740///transferase activity+++GO:0016757///transferase activit…	cellular_component+++molecular_function+++biological_process	[Cellular Component]---organelle+++cell part+++cell+++membrane+++membrane part+++organelle part+++[Molecular Function]---catalytic activity+++[Biological Process]---metabolic process+++cellular process
NM_001008669.1	PSENEN	mRNA	[Cellular Component]---GO:0005783///endoplasmic reticulum+++GO:0005789///endoplasmic reticulum membrane+++GO:0005794///Golgi apparatus+++GO:0005886///plasma membrane+++GO:0016020///membrane+++GO:0016021///integral component of membrane+++GO:0032580///Golgi cisterna membrane+++GO:0070765///gamma-secretase complex+++[Biological Process]---GO:0007219///Notch signaling pathway+++GO:0007220///Notch re…	cellular_component+++biological_process	[Cellular Component]---organelle+++cell part+++cell+++membrane+++membrane part+++organelle part+++protein-containing complex+++[Biological Process]---regulation of biological process+++response to stimulus+++signaling+++cellular process+++biological regulation+++metabolic process+++positive regulation of biological process
NM_001011675.1	CXCR5	mRNA	[Cellular Component]---GO:0009897///external side of plasma membrane+++GO:0016020///membrane+++GO:0016021///integral component of membrane+++[Molecular Function]---GO:0004930///G protein-coupled receptor activity+++GO:0016493///C-C chemokine receptor activity+++GO:0016494///C-X-C chemokine receptor activity+++GO:0019956///chemokine binding+++GO:0019957///C-C chemokine binding+++[Biological Proces…	cellular_component+++molecular_function+++biological_process	[Cellular Component]---membrane+++cell part+++membrane part+++cell+++[Molecular Function]---molecular transducer activity+++binding+++[Biological Process]---locomotion+++response to stimulus+++immune system process+++regulation of biological process+++signaling+++cellular process+++biological regulation+++localization+++positive regulation of biological process+++developmental process+++multicell…
NM_001011678.2	NFE2L2	mRNA	[Cellular Component]---GO:0000785///chromatin+++GO:0005623///cell+++GO:0005634///nucleus+++GO:0005654///nucleoplasm+++GO:0005737///cytoplasm+++GO:0005794///Golgi apparatus+++GO:0005813///centrosome+++GO:0005829///cytosol+++GO:0005886///plasma membrane+++GO:0032993///protein-DNA complex+++[Molecular Function]---GO:0000976///transcription regulatory region sequence-specific DNA binding+++GO:0000978…	cellular_component+++molecular_function+++biological_process	[Cellular Component]---organelle+++cell part+++cell+++organelle part+++membrane-enclosed lumen+++membrane+++protein-containing complex+++[Molecular Function]---binding+++transcription regulator activity+++[Biological Process]---metabolic process+++regulation of biological process+++cellular process+++biological regulation+++response to stimulus+++positive regulation of biological process+++multic…
NM_001011679.1	BHMT	mRNA	[Cellular Component]---GO:0005737///cytoplasm+++GO:0005829///cytosol+++GO:0070062///extracellular exosome+++[Molecular Function]---GO:0008168///methyltransferase activity+++GO:0008270///zinc ion binding+++GO:0016740///transferase activity+++GO:0046872///metal ion binding+++GO:0047150///betaine-homocysteine S-methyltransferase activity+++[Biological Process]---GO:0006577///amino-acid betaine metab…	cellular_component+++molecular_function+++biological_process	[Cellular Component]---cell part+++cell+++organelle+++extracellular region part+++extracellular region+++[Molecular Function]---catalytic activity+++binding+++[Biological Process]---metabolic process+++cellular process
NM_001011685.1	MTHFR	mRNA	[Cellular Component]---GO:0005829///cytosol+++[Molecular Function]---GO:0003824///catalytic activity+++GO:0004489///methylenetetrahydrofolate reductase (NAD(P)H) activity+++GO:0016491///oxidoreductase activity+++GO:0044877///protein-containing complex binding+++GO:0050660///flavin adenine dinucleotide binding+++GO:0071949///FAD binding+++GO:0072341///modified amino acid binding+++[Biological Proc…	cellular_component+++molecular_function+++biological_process	[Cellular Component]---cell part+++cell+++[Molecular Function]---catalytic activity+++binding+++[Biological Process]---developmental process+++multicellular organismal process+++metabolic process+++cellular process+++regulation of biological process+++cellular component organization or biogenesis+++biological regulation
NM_001012281.1	CFLAR	mRNA	[Cellular Component]---GO:0005737///cytoplasm+++GO:0031264///death-inducing signaling complex+++GO:0097342///ripoptosome+++[Molecular Function]---GO:0002020///protease binding+++GO:0004197///cysteine-type endopeptidase activity+++GO:0008047///enzyme activator activity+++GO:0008234///cysteine-type peptidase activity+++GO:0016504///peptidase activator activity+++GO:0097153///cysteine-type endopepti…	cellular_component+++molecular_function+++biological_process	[Cellular Component]---cell part+++cell+++membrane+++membrane part+++protein-containing complex+++[Molecular Function]---binding+++catalytic activity+++molecular function regulator+++[Biological Process]---metabolic process+++cellular process+++regulation of biological process+++positive regulation of biological process+++biological regulation+++developmental process+++multicellular organismal pr…
NM_001012282.1	GPAM	mRNA	[Cellular Component]---GO:0005739///mitochondrion+++GO:0005741///mitochondrial outer membrane+++GO:0005886///plasma membrane+++GO:0016020///membrane+++GO:0016021///integral component of membrane+++GO:0031966///mitochondrial membrane+++[Molecular Function]---GO:0004366///glycerol-3-phosphate O-acyltransferase activity+++GO:0008374///O-acyltransferase activity+++GO:0016740///transferase activity+++…	cellular_component+++molecular_function+++biological_process	[Cellular Component]---organelle+++cell part+++cell+++membrane+++organelle part+++membrane part+++[Molecular Function]---catalytic activity+++[Biological Process]---metabolic process+++cellular process+++response to stimulus+++developmental process+++regulation of biological process+++positive regulation of biological process+++multicellular organismal process+++growth+++biological regulation+++b…
NM_001012285.2	LEPR	mRNA	[Cellular Component]---GO:0009897///external side of plasma membrane+++GO:0016020///membrane+++GO:0016021///integral component of membrane+++GO:0043235///receptor complex+++[Molecular Function]---GO:0004896///cytokine receptor activity+++GO:0017046///peptide hormone binding+++GO:0019955///cytokine binding+++GO:0038021///leptin receptor activity+++GO:0042802///identical protein binding+++[Biologic…	cellular_component+++molecular_function+++biological_process	[Cellular Component]---membrane+++cell part+++membrane part+++cell+++protein-containing complex+++[Molecular Function]---molecular transducer activity+++binding+++[Biological Process]---developmental process+++multicellular organismal process+++metabolic process+++regulation of biological process+++positive regulation of biological process+++cellular process+++biological regulation+++localization…
NM_001012519.1	AKR1B1	mRNA	[Cellular Component]---GO:0005737///cytoplasm+++GO:0005829///cytosol+++[Molecular Function]---GO:0001758///retinal dehydrogenase activity+++GO:0004032///alditol:NADP+ 1-oxidoreductase activity+++GO:0008106///alcohol dehydrogenase (NADP+) activity+++GO:0016491///oxidoreductase activity+++GO:0047655///allyl-alcohol dehydrogenase activity+++GO:0052650///NADP-retinol dehydrogenase activity+++[Biologi…	cellular_component+++molecular_function+++biological_process	[Cellular Component]---cell part+++cell+++[Molecular Function]---catalytic activity+++[Biological Process]---metabolic process+++cellular process+++biological regulation
NM_001012998.2	CAPZA2	mRNA	[Cellular Component]---GO:0005903///brush border+++GO:0008290///F-actin capping protein complex+++GO:0016020///membrane+++GO:0030863///cortical cytoskeleton+++[Molecular Function]---GO:0003779///actin binding+++GO:0051015///actin filament binding+++[Biological Process]---GO:0030036///actin cytoskeleton organization+++GO:0051016///barbed-end actin filament capping+++GO:0051693///actin filament cap…	cellular_component+++molecular_function+++biological_process	[Cellular Component]---cell part+++cell+++organelle+++protein-containing complex+++organelle part+++membrane+++[Molecular Function]---binding+++[Biological Process]---cellular process+++cellular component organization or biogenesis+++regulation of biological process+++negative regulation of biological process+++biological regulation
NM_001013001.1	WNT2	mRNA	[Cellular Component]---GO:0005576///extracellular region+++GO:0005615///extracellular space+++GO:0005737///cytoplasm+++GO:0031232///extrinsic component of external side of plasma membrane+++GO:0062023///collagen-containing extracellular matrix+++[Molecular Function]---GO:0005102///signaling receptor binding+++GO:0005109///frizzled binding+++GO:0005125///cytokine activity+++GO:0048018///receptor l…	cellular_component+++molecular_function+++biological_process	[Cellular Component]---extracellular region+++extracellular region part+++cell part+++cell+++membrane+++membrane part+++[Molecular Function]---binding+++molecular function regulator+++[Biological Process]---regulation of biological process+++cell proliferation+++positive regulation of biological process+++cellular process+++biological regulation+++signaling+++developmental process+++multicellular…
NM_001013004.1	FDFT1	mRNA	[Cellular Component]---GO:0005783///endoplasmic reticulum+++GO:0005789///endoplasmic reticulum membrane+++GO:0016020///membrane+++GO:0016021///integral component of membrane+++[Molecular Function]---GO:0003824///catalytic activity+++GO:0004310///farnesyl-diphosphate farnesyltransferase activity+++GO:0016740///transferase activity+++GO:0016765///transferase activity, transferring alkyl or aryl (ot…	cellular_component+++molecular_function+++biological_process	[Cellular Component]---organelle+++cell part+++cell+++membrane+++membrane part+++organelle part+++[Molecular Function]---catalytic activity+++[Biological Process]---metabolic process+++cellular process
NM_001013401.2	LTA	mRNA	[Cellular Component]---GO:0005576///extracellular region+++GO:0005615///extracellular space+++GO:0016020///membrane+++[Molecular Function]---GO:0005125///cytokine activity+++GO:0005164///tumor necrosis factor receptor binding+++[Biological Process]---GO:0002876///positive regulation of chronic inflammatory response to antigenic stimulus+++GO:0002925///positive regulation of humoral immune respons…	cellular_component+++molecular_function+++biological_process	[Cellular Component]---extracellular region+++extracellular region part+++membrane+++[Molecular Function]---binding+++molecular function regulator+++[Biological Process]---regulation of biological process+++immune system process+++response to stimulus+++positive regulation of biological process+++biological regulation+++signaling+++cellular process+++multicellular organismal process+++development…
NM_001013402.1	SGCA	mRNA	[Cellular Component]---GO:0005886///plasma membrane+++GO:0005911///cell-cell junction+++GO:0016011///dystroglycan complex+++GO:0016012///sarcoglycan complex+++GO:0016020///membrane+++GO:0016021///integral component of membrane+++GO:0042383///sarcolemma+++GO:0045121///membrane raft+++[Molecular Function]---GO:0005509///calcium ion binding	cellular_component+++molecular_function	[Cellular Component]---membrane+++cell part+++cell+++cell junction+++membrane part+++protein-containing complex+++[Molecular Function]---binding
NM_001013585.4	S1PR1	mRNA	[Cellular Component]---GO:0005654///nucleoplasm+++GO:0005737///cytoplasm+++GO:0005768///endosome+++GO:0005886///plasma membrane+++GO:0009897///external side of plasma membrane+++GO:0016020///membrane+++GO:0016021///integral component of membrane+++GO:0031226///intrinsic component of plasma membrane+++GO:0043231///intracellular membrane-bounded organelle+++GO:0045121///membrane raft+++[Molecular F…	cellular_component+++molecular_function+++biological_process	[Cellular Component]---membrane-enclosed lumen+++organelle+++cell part+++cell+++organelle part+++membrane+++membrane part+++[Molecular Function]---binding+++molecular transducer activity+++[Biological Process]---developmental process+++multicellular organismal process+++growth+++regulation of biological process+++response to stimulus+++signaling+++cellular process+++biological regulation+++locomo…
NM_001013589.3	TPI1	mRNA	[Cellular Component]---GO:0005737///cytoplasm+++GO:0005829///cytosol+++[Molecular Function]---GO:0003824///catalytic activity+++GO:0004807///triose-phosphate isomerase activity+++GO:0008929///methylglyoxal synthase activity+++GO:0016829///lyase activity+++GO:0016853///isomerase activity+++GO:0031625///ubiquitin protein ligase binding+++GO:0042803///protein homodimerization activity+++[Biological …	cellular_component+++molecular_function+++biological_process	[Cellular Component]---cell part+++cell+++[Molecular Function]---catalytic activity+++binding+++[Biological Process]---metabolic process+++cellular process+++developmental process+++multicellular organismal process
NM_001013591.1	VIL1	mRNA	[Cellular Component]---GO:0001726///ruffle+++GO:0005737///cytoplasm+++GO:0005856///cytoskeleton+++GO:0005886///plasma membrane+++GO:0005902///microvillus+++GO:0005903///brush border+++GO:0015629///actin cytoskeleton+++GO:0030027///lamellipodium+++GO:0030175///filopodium+++GO:0032432///actin filament bundle+++GO:0032433///filopodium tip+++GO:0042995///cell projection+++[Molecular Function]---GO:00…	cellular_component+++molecular_function+++biological_process	[Cellular Component]---cell part+++cell+++organelle+++membrane+++organelle part+++[Molecular Function]---binding+++molecular function regulator+++[Biological Process]---localization+++multicellular organismal process+++cellular process+++cellular component organization or biogenesis+++regulation of biological process+++response to stimulus+++signaling+++biological regulation+++developmental proce…
NM_001013594.1	CRYGB	mRNA	[Molecular Function]---GO:0005212///structural constituent of eye lens+++[Biological Process]---GO:0002088///lens development in camera-type eye+++GO:0007601///visual perception	molecular_function+++biological_process	[Molecular Function]---structural molecule activity+++[Biological Process]---developmental process+++multicellular organismal process
NM_001013598.2	PSMD4	mRNA	[Cellular Component]---GO:0000502///proteasome complex+++GO:0005634///nucleus+++GO:0005654///nucleoplasm+++GO:0005829///cytosol+++GO:0008540///proteasome regulatory particle, base subcomplex+++GO:0022624///proteasome accessory complex+++[Molecular Function]---GO:0031593///polyubiquitin modification-dependent protein binding+++[Biological Process]---GO:0043161///proteasome-mediated ubiquitin-depen…	cellular_component+++molecular_function+++biological_process	[Cellular Component]---cell part+++protein-containing complex+++cell+++organelle+++membrane-enclosed lumen+++organelle part+++[Molecular Function]---binding+++[Biological Process]---metabolic process+++cellular process+++cellular component organization or biogenesis
NM_001014384.1	KCNAB2	mRNA	[Cellular Component]---GO:0005737///cytoplasm+++GO:0005829///cytosol+++GO:0005856///cytoskeleton+++GO:0005874///microtubule+++GO:0005886///plasma membrane+++GO:0008076///voltage-gated potassium channel complex+++GO:0014069///postsynaptic density+++GO:0016020///membrane+++GO:0016021///integral component of membrane+++GO:0030054///cell junction+++GO:0030424///axon+++GO:0031234///extrinsic component…	cellular_component+++molecular_function+++biological_process	[Cellular Component]---cell part+++cell+++organelle+++supramolecular complex+++organelle part+++membrane+++membrane part+++protein-containing complex+++synapse+++synapse part+++cell junction+++[Molecular Function]---catalytic activity+++transporter activity+++molecular function regulator+++binding+++[Biological Process]---developmental process+++immune system process+++multicellular organismal pr…
NM_001014392.1	B3GAT2	mRNA	[Cellular Component]---GO:0000139///Golgi membrane+++GO:0005794///Golgi apparatus+++GO:0016020///membrane+++GO:0016021///integral component of membrane+++[Molecular Function]---GO:0015018///galactosylgalactosylxylosylprotein 3-beta-glucuronosyltransferase activity+++GO:0016740///transferase activity+++GO:0046872///metal ion binding+++[Biological Process]---GO:0005975///carbohydrate metabolic proc…	cellular_component+++molecular_function+++biological_process	[Cellular Component]---membrane+++organelle+++cell part+++cell+++organelle part+++membrane part+++[Molecular Function]---catalytic activity+++binding+++[Biological Process]---metabolic process+++cellular process
NM_001014847.1	RALY	mRNA	[Cellular Component]---GO:0005634///nucleus+++GO:0016020///membrane+++GO:0016021///integral component of membrane+++GO:0071013///catalytic step 2 spliceosome+++[Molecular Function]---GO:0003676///nucleic acid binding+++GO:0003712///transcription coregulator activity+++GO:0003723///RNA binding+++[Biological Process]---GO:0042632///cholesterol homeostasis+++GO:1903506///regulation of nucleic acid-t…	cellular_component+++molecular_function+++biological_process	[Cellular Component]---organelle+++cell part+++cell+++membrane+++membrane part+++protein-containing complex+++organelle part+++[Molecular Function]---binding+++transcription regulator activity+++[Biological Process]---biological regulation+++metabolic process+++regulation of biological process+++cellular process
NM_001014850.1	COMMD5	mRNA	[Cellular Component]---GO:0005634///nucleus+++GO:0005654///nucleoplasm+++GO:0005737///cytoplasm+++GO:0005829///cytosol	cellular_component	[Cellular Component]---organelle+++cell part+++cell+++membrane-enclosed lumen+++organelle part
NM_001014853.1	TOMM40L	mRNA	[Cellular Component]---GO:0005739///mitochondrion+++GO:0005741///mitochondrial outer membrane+++GO:0005742///mitochondrial outer membrane translocase complex+++GO:0016020///membrane+++GO:0016021///integral component of membrane+++GO:0032991///protein-containing complex+++[Molecular Function]---GO:0008320///protein transmembrane transporter activity+++[Biological Process]---GO:0015031///protein tr…	cellular_component+++molecular_function+++biological_process	[Cellular Component]---organelle+++cell part+++cell+++membrane+++organelle part+++membrane part+++protein-containing complex+++[Molecular Function]---transporter activity+++[Biological Process]---localization+++cellular process+++cellular component organization or biogenesis
NM_001014856.1	NOP16	mRNA	[Cellular Component]---GO:0005634///nucleus+++GO:0005730///nucleolus+++[Biological Process]---GO:0042273///ribosomal large subunit biogenesis	cellular_component+++biological_process	[Cellular Component]---organelle+++cell part+++cell+++membrane-enclosed lumen+++organelle part+++[Biological Process]---cellular component organization or biogenesis
NM_001014858.1	RNF34	mRNA	[Cellular Component]---GO:0005634///nucleus+++GO:0005654///nucleoplasm+++GO:0005737///cytoplasm+++GO:0005829///cytosol+++GO:0005886///plasma membrane+++GO:0012505///endomembrane system+++GO:0016020///membrane+++GO:0016604///nuclear body+++GO:0016607///nuclear speck+++[Molecular Function]---GO:0002039///p53 binding+++GO:0016740///transferase activity+++GO:0031625///ubiquitin protein ligase binding…	cellular_component+++molecular_function+++biological_process	[Cellular Component]---organelle+++cell part+++cell+++membrane-enclosed lumen+++organelle part+++membrane+++[Molecular Function]---binding+++catalytic activity+++[Biological Process]---metabolic process+++cellular process+++regulation of biological process+++response to stimulus+++signaling+++biological regulation+++negative regulation of biological process
NM_001014864.1	SLC52A3	mRNA	[Cellular Component]---GO:0005886///plasma membrane+++GO:0005887///integral component of plasma membrane+++GO:0016020///membrane+++GO:0016021///integral component of membrane+++[Molecular Function]---GO:0032217///riboflavin transmembrane transporter activity+++[Biological Process]---GO:0007605///sensory perception of sound+++GO:0032218///riboflavin transport+++GO:0034605///cellular response to he…	cellular_component+++molecular_function+++biological_process	[Cellular Component]---membrane+++cell part+++cell+++membrane part+++[Molecular Function]---transporter activity+++[Biological Process]---multicellular organismal process+++response to stimulus+++localization+++cellular process
NM_001014865.1	DRG2	mRNA	[Cellular Component]---GO:0005634///nucleus+++GO:0005654///nucleoplasm+++GO:0005737///cytoplasm+++GO:0005829///cytosol+++GO:0043231///intracellular membrane-bounded organelle+++[Molecular Function]---GO:0000166///nucleotide binding+++GO:0003723///RNA binding+++GO:0003924///GTPase activity+++GO:0005525///GTP binding+++GO:0016787///hydrolase activity+++GO:0046872///metal ion binding+++[Biological P…	cellular_component+++molecular_function+++biological_process	[Cellular Component]---organelle+++cell part+++cell+++membrane-enclosed lumen+++organelle part+++[Molecular Function]---binding+++catalytic activity+++[Biological Process]---metabolic process+++cellular process
NM_001014873.1	WDR55	mRNA	[Cellular Component]---GO:0005634///nucleus+++GO:0005654///nucleoplasm+++GO:0005730///nucleolus+++GO:0005737///cytoplasm+++[Biological Process]---GO:0006364///rRNA processing	cellular_component+++biological_process	[Cellular Component]---organelle+++cell part+++cell+++membrane-enclosed lumen+++organelle part+++[Biological Process]---metabolic process+++cellular process+++cellular component organization or biogenesis
NM_001014875.1	DUSP11	mRNA	[Cellular Component]---GO:0001650///fibrillar center+++GO:0005634///nucleus+++GO:0005654///nucleoplasm+++GO:0016607///nuclear speck+++GO:0045171///intercellular bridge+++[Molecular Function]---GO:0003723///RNA binding+++GO:0004651///polynucleotide 5'-phosphatase activity+++GO:0004725///protein tyrosine phosphatase activity+++GO:0008138///protein tyrosine/serine/threonine phosphatase activity+++GO…	cellular_component+++molecular_function+++biological_process	[Cellular Component]---membrane-enclosed lumen+++organelle+++cell part+++cell+++organelle part+++extracellular region part+++extracellular region+++[Molecular Function]---binding+++catalytic activity+++[Biological Process]---metabolic process+++cellular process
NM_001014880.3	TSPAN17	mRNA	[Cellular Component]---GO:0005887///integral component of plasma membrane+++GO:0016020///membrane+++GO:0016021///integral component of membrane+++[Biological Process]---GO:0051604///protein maturation+++GO:0072659///protein localization to plasma membrane	cellular_component+++biological_process	[Cellular Component]---membrane+++cell part+++membrane part+++cell+++[Biological Process]---metabolic process+++localization
NM_001014891.1	ARL6IP5	mRNA	[Cellular Component]---GO:0005737///cytoplasm+++GO:0005783///endoplasmic reticulum+++GO:0005789///endoplasmic reticulum membrane+++GO:0005856///cytoskeleton+++GO:0005886///plasma membrane+++GO:0016020///membrane+++GO:0016021///integral component of membrane+++[Biological Process]---GO:0002037///negative regulation of L-glutamate import across plasma membrane+++GO:0008631///intrinsic apoptotic sig…	cellular_component+++biological_process	[Cellular Component]---cell part+++cell+++organelle+++membrane+++membrane part+++organelle part+++[Biological Process]---regulation of biological process+++negative regulation of biological process+++response to stimulus+++localization+++biological regulation+++signaling+++cellular process+++metabolic process+++positive regulation of biological process
NM_001014892.1	CDIP1	mRNA	[Cellular Component]---GO:0005634///nucleus+++GO:0005764///lysosome+++GO:0005765///lysosomal membrane+++GO:0005768///endosome+++GO:0016020///membrane+++GO:0031902///late endosome membrane+++GO:0098560///cytoplasmic side of late endosome membrane+++GO:0098574///cytoplasmic side of lysosomal membrane+++[Molecular Function]---GO:0046872///metal ion binding+++[Biological Process]---GO:0006915///apopt…	cellular_component+++molecular_function+++biological_process	[Cellular Component]---organelle+++cell part+++cell+++membrane+++organelle part+++membrane part+++[Molecular Function]---binding+++[Biological Process]---cellular process+++regulation of biological process+++response to stimulus+++signaling+++biological regulation
NM_001014893.1	FAM214B	mRNA	[Cellular Component]---GO:0005634///nucleus	cellular_component	[Cellular Component]---organelle+++cell part+++cell
NM_001014898.2	JOSD1	mRNA	[Cellular Component]---GO:0005737///cytoplasm+++GO:0005886///plasma membrane+++GO:0016020///membrane+++[Molecular Function]---GO:0004843///thiol-dependent ubiquitin-specific protease activity+++GO:0008233///peptidase activity+++GO:0016787///hydrolase activity+++GO:0036459///thiol-dependent ubiquitinyl hydrolase activity+++[Biological Process]---GO:0006508///proteolysis+++GO:0016579///protein deub…	cellular_component+++molecular_function+++biological_process	[Cellular Component]---cell part+++cell+++membrane+++[Molecular Function]---catalytic activity+++[Biological Process]---metabolic process+++cellular process
NM_001014899.1	TCF21	mRNA	[Cellular Component]---GO:0005634///nucleus+++[Molecular Function]---GO:0000977///RNA polymerase II regulatory region sequence-specific DNA binding+++GO:0000981///DNA-binding transcription factor activity, RNA polymerase II-specific+++GO:0001227///DNA-binding transcription repressor activity, RNA polymerase II-specific+++GO:0001228///DNA-binding transcription activator activity, RNA polymerase II…	cellular_component+++molecular_function+++biological_process	[Cellular Component]---organelle+++cell part+++cell+++[Molecular Function]---binding+++transcription regulator activity+++[Biological Process]---metabolic process+++regulation of biological process+++negative regulation of biological process+++cellular process+++biological regulation+++developmental process+++multicellular organismal process+++reproduction+++reproductive process+++positive regula…
NM_001014901.1	RBM14	mRNA	[Cellular Component]---GO:0005634///nucleus+++GO:0005667///transcription factor complex+++GO:0005730///nucleolus+++GO:0005737///cytoplasm+++GO:0016607///nuclear speck+++[Molecular Function]---GO:0003676///nucleic acid binding+++GO:0003723///RNA binding+++GO:0003729///mRNA binding+++GO:0030374///nuclear receptor transcription coactivator activity+++[Biological Process]---GO:0002218///activation of…	cellular_component+++molecular_function+++biological_process	[Cellular Component]---organelle+++cell part+++cell+++protein-containing complex+++membrane-enclosed lumen+++organelle part+++[Molecular Function]---binding+++transcription regulator activity+++[Biological Process]---regulation of biological process+++immune system process+++response to stimulus+++positive regulation of biological process+++biological regulation+++metabolic process+++cellular pro…
NM_001014903.1	POGLUT1	mRNA	[Cellular Component]---GO:0005783///endoplasmic reticulum+++GO:0005788///endoplasmic reticulum lumen+++GO:0005829///cytosol+++GO:0012505///endomembrane system+++[Molecular Function]---GO:0016740///transferase activity+++GO:0016757///transferase activity, transferring glycosyl groups+++GO:0035251///UDP-glucosyltransferase activity+++GO:0035252///UDP-xylosyltransferase activity+++GO:0046527///gluco…	cellular_component+++molecular_function+++biological_process	[Cellular Component]---organelle+++cell part+++cell+++membrane-enclosed lumen+++organelle part+++[Molecular Function]---catalytic activity+++[Biological Process]---developmental process+++multicellular organismal process+++metabolic process+++cellular process+++regulation of biological process+++response to stimulus+++signaling+++biological regulation+++positive regulation of biological process
NM_001014909.1	ANGPTL7	mRNA	[Cellular Component]---GO:0005576///extracellular region+++GO:0005615///extracellular space+++GO:0062023///collagen-containing extracellular matrix+++[Molecular Function]---GO:0042802///identical protein binding+++[Biological Process]---GO:1901346///negative regulation of vasculature development involved in avascular cornea development in camera-type eye+++GO:1903053///regulation of extracellular…	cellular_component+++molecular_function+++biological_process	[Cellular Component]---extracellular region+++extracellular region part+++[Molecular Function]---binding+++[Biological Process]---developmental process+++regulation of biological process+++negative regulation of biological process+++multicellular organismal process+++biological regulation+++cellular process+++cellular component organization or biogenesis
NM_001014911.1	HSPBAP1	mRNA	[Cellular Component]---GO:0005737///cytoplasm+++[Molecular Function]---GO:0016706///oxidoreductase activity, acting on paired donors, with incorporation or reduction of molecular oxygen, 2-oxoglutarate as one donor, and incorporation of one atom each of oxygen into both donors+++[Biological Process]---GO:0055114///oxidation-reduction process	cellular_component+++molecular_function+++biological_process	[Cellular Component]---cell part+++cell+++[Molecular Function]---catalytic activity+++[Biological Process]---metabolic process
NM_001014912.1	HMOX1	mRNA	[Cellular Component]---GO:0005634///nucleus+++GO:0005783///endoplasmic reticulum+++GO:0005789///endoplasmic reticulum membrane+++GO:0016020///membrane+++GO:0016021///integral component of membrane+++GO:0043231///intracellular membrane-bounded organelle+++GO:0048471///perinuclear region of cytoplasm+++[Molecular Function]---GO:0004392///heme oxygenase (decyclizing) activity+++GO:0005198///structur…	cellular_component+++molecular_function+++biological_process	[Cellular Component]---organelle+++cell part+++cell+++membrane+++membrane part+++organelle part+++[Molecular Function]---catalytic activity+++structural molecule activity+++binding+++[Biological Process]---response to stimulus+++metabolic process+++cellular process+++biological regulation+++regulation of biological process+++positive regulation of biological process+++negative regulation of biolo…
NM_001014914.2	TMBIM4	mRNA	[Cellular Component]---GO:0016020///membrane+++GO:0016021///integral component of membrane	cellular_component	[Cellular Component]---membrane+++membrane part
NM_001014918.1	ORC1	mRNA	[Cellular Component]---GO:0000784///nuclear chromosome, telomeric region+++GO:0000808///origin recognition complex+++GO:0005634///nucleus+++GO:0005654///nucleoplasm+++GO:0005664///nuclear origin of replication recognition complex+++[Molecular Function]---GO:0000166///nucleotide binding+++GO:0003677///DNA binding+++GO:0003682///chromatin binding+++GO:0003688///DNA replication origin binding+++GO:0…	cellular_component+++molecular_function+++biological_process	[Cellular Component]---membrane-enclosed lumen+++organelle+++cell part+++cell+++organelle part+++protein-containing complex+++[Molecular Function]---binding+++[Biological Process]---cellular process+++metabolic process+++regulation of biological process+++negative regulation of biological process+++biological regulation
NM_001014920.1	TMEM79	mRNA	[Cellular Component]---GO:0005737///cytoplasm+++GO:0005764///lysosome+++GO:0005765///lysosomal membrane+++GO:0005794///Golgi apparatus+++GO:0016020///membrane+++GO:0016021///integral component of membrane+++GO:0032588///trans-Golgi network membrane+++[Molecular Function]---GO:0042802///identical protein binding+++[Biological Process]---GO:0002070///epithelial cell maturation+++GO:0031069///hair f…	cellular_component+++molecular_function+++biological_process	[Cellular Component]---cell part+++cell+++organelle+++membrane+++organelle part+++membrane part+++[Molecular Function]---binding+++[Biological Process]---developmental process+++cellular process+++multicellular organismal process+++localization+++regulation of biological process+++positive regulation of biological process+++biological regulation
NM_001014923.1	NFE2	mRNA	[Cellular Component]---GO:0005634///nucleus+++GO:0005737///cytoplasm+++GO:0032993///protein-DNA complex+++[Molecular Function]---GO:0000976///transcription regulatory region sequence-specific DNA binding+++GO:0000987///proximal promoter sequence-specific DNA binding+++GO:0003677///DNA binding+++GO:0003700///DNA-binding transcription factor activity+++GO:0047485///protein N-terminus binding+++GO:0…	cellular_component+++molecular_function+++biological_process	[Cellular Component]---organelle+++cell part+++cell+++protein-containing complex+++[Molecular Function]---binding+++transcription regulator activity+++[Biological Process]---metabolic process+++regulation of biological process+++cellular process+++biological regulation+++positive regulation of biological process
NM_001014924.1	BYSL	mRNA	[Cellular Component]---GO:0005634///nucleus+++GO:0005654///nucleoplasm+++GO:0005730///nucleolus+++GO:0005737///cytoplasm+++GO:0030688///preribosome, small subunit precursor+++GO:0043231///intracellular membrane-bounded organelle+++GO:0045177///apical part of cell+++[Molecular Function]---GO:0030515///snoRNA binding+++[Biological Process]---GO:0000462///maturation of SSU-rRNA from tricistronic rRN…	cellular_component+++molecular_function+++biological_process	[Cellular Component]---organelle+++cell part+++cell+++membrane-enclosed lumen+++organelle part+++protein-containing complex+++[Molecular Function]---binding+++[Biological Process]---metabolic process+++cellular process+++cellular component organization or biogenesis+++developmental process+++multicellular organismal process+++cell proliferation
NM_001014929.1	ITGA2B	mRNA	[Cellular Component]---GO:0005886///plasma membrane+++GO:0005925///focal adhesion+++GO:0008305///integrin complex+++GO:0009897///external side of plasma membrane+++GO:0009986///cell surface+++GO:0016020///membrane+++GO:0016021///integral component of membrane+++GO:0070062///extracellular exosome+++[Molecular Function]---GO:0042802///identical protein binding+++GO:0050840///extracellular matrix bi…	cellular_component+++molecular_function+++biological_process	[Cellular Component]---membrane+++cell part+++cell+++cell junction+++membrane part+++protein-containing complex+++organelle+++extracellular region part+++extracellular region+++[Molecular Function]---binding+++[Biological Process]---biological adhesion+++regulation of biological process+++response to stimulus+++signaling+++cellular process+++biological regulation
NM_001014931.1	ORMDL2	mRNA	[Cellular Component]---GO:0005623///cell+++GO:0005783///endoplasmic reticulum+++GO:0005789///endoplasmic reticulum membrane+++GO:0016020///membrane+++GO:0016021///integral component of membrane+++GO:0035339///SPOTS complex+++[Biological Process]---GO:0006672///ceramide metabolic process+++GO:0090155///negative regulation of sphingolipid biosynthetic process+++GO:0090156///cellular sphingolipid ho…	cellular_component+++biological_process	[Cellular Component]---cell+++organelle+++cell part+++membrane+++membrane part+++organelle part+++protein-containing complex+++[Biological Process]---metabolic process+++cellular process+++regulation of biological process+++negative regulation of biological process+++cellular component organization or biogenesis+++biological regulation
NM_001014934.1	CDK2	mRNA	[Cellular Component]---GO:0000307///cyclin-dependent protein kinase holoenzyme complex+++GO:0000781///chromosome, telomeric region+++GO:0000793///condensed chromosome+++GO:0000805///X chromosome+++GO:0000806///Y chromosome+++GO:0005634///nucleus+++GO:0005654///nucleoplasm+++GO:0005667///transcription factor complex+++GO:0005737///cytoplasm+++GO:0005768///endosome+++GO:0005813///centrosome+++GO:00…	cellular_component+++molecular_function+++biological_process	[Cellular Component]---cell part+++protein-containing complex+++cell+++organelle+++organelle part+++membrane-enclosed lumen+++[Molecular Function]---binding+++catalytic activity+++molecular transducer activity+++[Biological Process]---cellular process+++metabolic process+++regulation of biological process+++negative regulation of biological process+++biological regulation+++response to stimulus++…
NM_001014938.1	LRRC4	mRNA	[Cellular Component]---GO:0016020///membrane+++GO:0016021///integral component of membrane+++GO:0043197///dendritic spine+++GO:0044309///neuron spine+++GO:0045202///synapse+++GO:0045211///postsynaptic membrane+++GO:0060076///excitatory synapse+++GO:0098685///Schaffer collateral - CA1 synapse+++GO:0098978///glutamatergic synapse+++GO:0099061///integral component of postsynaptic density membrane+++…	cellular_component+++biological_process	[Cellular Component]---membrane+++membrane part+++cell part+++cell+++synapse+++synapse part+++organelle+++organelle part+++[Biological Process]---regulation of biological process+++signaling+++cellular process+++biological regulation+++cellular component organization or biogenesis+++localization+++developmental process+++multicellular organismal process
NM_001014945.2	C1QA	mRNA	[Cellular Component]---GO:0005576///extracellular region+++GO:0005581///collagen trimer+++GO:0005623///cell+++GO:0045202///synapse+++GO:0098794///postsynapse+++[Biological Process]---GO:0001774///microglial cell activation+++GO:0002376///immune system process+++GO:0006958///complement activation, classical pathway+++GO:0007568///aging+++GO:0016322///neuron remodeling+++GO:0045087///innate immune …	cellular_component+++biological_process	[Cellular Component]---extracellular region+++protein-containing complex+++cell+++synapse+++cell part+++synapse part+++[Biological Process]---immune system process+++response to stimulus+++cellular process+++metabolic process+++regulation of biological process+++positive regulation of biological process+++biological regulation+++developmental process+++multicellular organismal process+++cellular …
NM_001014946.1	FBLN5	mRNA	[Cellular Component]---GO:0005576///extracellular region+++GO:0005615///extracellular space+++GO:0062023///collagen-containing extracellular matrix+++GO:0071953///elastic fiber+++[Molecular Function]---GO:0005178///integrin binding+++GO:0005509///calcium ion binding+++GO:0008022///protein C-terminus binding+++GO:0042803///protein homodimerization activity+++[Biological Process]---GO:0000122///neg…	cellular_component+++molecular_function+++biological_process	[Cellular Component]---extracellular region+++extracellular region part+++supramolecular complex+++[Molecular Function]---binding+++[Biological Process]---metabolic process+++regulation of biological process+++negative regulation of biological process+++cellular process+++biological regulation+++biological adhesion+++developmental process+++multicellular organismal process+++cellular component or…
NM_001014950.1	ID3	mRNA	[Cellular Component]---GO:0005634///nucleus+++GO:0005737///cytoplasm+++[Molecular Function]---GO:0003713///transcription coactivator activity+++GO:0008134///transcription factor binding+++GO:0019904///protein domain specific binding+++GO:0046983///protein dimerization activity+++GO:1901707///leptomycin B binding+++[Biological Process]---GO:0000122///negative regulation of transcription by RNA pol…	cellular_component+++molecular_function+++biological_process	[Cellular Component]---organelle+++cell part+++cell+++[Molecular Function]---transcription regulator activity+++binding+++[Biological Process]---metabolic process+++regulation of biological process+++negative regulation of biological process+++cellular process+++biological regulation+++developmental process+++multicellular organismal process+++rhythmic process+++positive regulation of biological …
NM_001014955.1	HSPB8	mRNA	[Cellular Component]---GO:0005634///nucleus+++GO:0005654///nucleoplasm+++GO:0005737///cytoplasm+++GO:0005829///cytosol+++GO:0016604///nuclear body+++GO:0101031///chaperone complex+++[Molecular Function]---GO:0042802///identical protein binding+++GO:0042803///protein homodimerization activity+++[Biological Process]---GO:0034620///cellular response to unfolded protein+++GO:1905337///positive regula…	cellular_component+++molecular_function+++biological_process	[Cellular Component]---organelle+++cell part+++cell+++membrane-enclosed lumen+++organelle part+++protein-containing complex+++[Molecular Function]---binding+++[Biological Process]---response to stimulus+++cellular process+++metabolic process+++regulation of biological process+++positive regulation of biological process+++biological regulation
NM_001014958.1	SMUG1	mRNA	[Cellular Component]---GO:0001650///fibrillar center+++GO:0005634///nucleus+++GO:0005654///nucleoplasm+++GO:0005730///nucleolus+++GO:0005829///cytosol+++[Molecular Function]---GO:0000703///oxidized pyrimidine nucleobase lesion DNA N-glycosylase activity+++GO:0003677///DNA binding+++GO:0004844///uracil DNA N-glycosylase activity+++GO:0016787///hydrolase activity+++GO:0017065///single-strand select…	cellular_component+++molecular_function+++biological_process	[Cellular Component]---membrane-enclosed lumen+++organelle+++cell part+++cell+++organelle part+++[Molecular Function]---catalytic activity+++binding+++[Biological Process]---metabolic process+++response to stimulus+++cellular process
NM_001014962.1	PRMT6	mRNA	[Cellular Component]---GO:0005634///nucleus+++GO:0005654///nucleoplasm+++GO:0005730///nucleolus+++[Molecular Function]---GO:0003682///chromatin binding+++GO:0008168///methyltransferase activity+++GO:0008469///histone-arginine N-methyltransferase activity+++GO:0016274///protein-arginine N-methyltransferase activity+++GO:0016740///transferase activity+++GO:0035241///protein-arginine omega-N monomet…	cellular_component+++molecular_function+++biological_process	[Cellular Component]---organelle+++cell part+++cell+++membrane-enclosed lumen+++organelle part+++[Molecular Function]---binding+++catalytic activity+++[Biological Process]---metabolic process+++regulation of biological process+++negative regulation of biological process+++cellular process+++biological regulation+++response to stimulus+++cellular component organization or biogenesis+++developmenta…
NM_001014965.2	ANKRD49	mRNA	[Cellular Component]---GO:0005634///nucleus+++[Biological Process]---GO:0007283///spermatogenesis+++GO:0030154///cell differentiation+++GO:0045893///positive regulation of transcription, DNA-templated	cellular_component+++biological_process	[Cellular Component]---organelle+++cell part+++cell+++[Biological Process]---reproduction+++reproductive process+++multicellular organismal process+++multi-organism process+++developmental process+++cellular process+++metabolic process+++regulation of biological process+++positive regulation of biological process+++biological regulation
NM_001015514.2	ETV6	mRNA	[Cellular Component]---GO:0005634///nucleus+++GO:0005730///nucleolus+++GO:0005829///cytosol+++GO:0042025///host cell nucleus+++[Molecular Function]---GO:0000977///RNA polymerase II regulatory region sequence-specific DNA binding+++GO:0000978///RNA polymerase II proximal promoter sequence-specific DNA binding+++GO:0000981///DNA-binding transcription factor activity, RNA polymerase II-specific+++GO…	cellular_component+++molecular_function+++biological_process	[Cellular Component]---organelle+++cell part+++cell+++membrane-enclosed lumen+++organelle part+++other organism part+++other organism+++[Molecular Function]---binding+++transcription regulator activity+++[Biological Process]---metabolic process+++regulation of biological process+++negative regulation of biological process+++cellular process+++biological regulation+++reproduction+++reproductive pr…
NM_001015519.1	PRR5L	mRNA	[Cellular Component]---GO:0031932///TORC2 complex+++[Molecular Function]---GO:0031625///ubiquitin protein ligase binding+++[Biological Process]---GO:0001933///negative regulation of protein phosphorylation+++GO:0001934///positive regulation of protein phosphorylation+++GO:0009968///negative regulation of signal transduction+++GO:0010762///regulation of fibroblast migration+++GO:0014068///positive…	cellular_component+++molecular_function+++biological_process	[Cellular Component]---cell part+++protein-containing complex+++cell+++[Molecular Function]---binding+++[Biological Process]---metabolic process+++regulation of biological process+++negative regulation of biological process+++cellular process+++biological regulation+++positive regulation of biological process+++response to stimulus+++signaling+++locomotion+++localization
NM_001015520.1	CERS4	mRNA	[Cellular Component]---GO:0005634///nucleus+++GO:0005783///endoplasmic reticulum+++GO:0005789///endoplasmic reticulum membrane+++GO:0016020///membrane+++GO:0016021///integral component of membrane+++[Molecular Function]---GO:0003677///DNA binding+++GO:0016410///N-acyltransferase activity+++GO:0016740///transferase activity+++GO:0050291///sphingosine N-acyltransferase activity+++[Biological Proces…	cellular_component+++molecular_function+++biological_process	[Cellular Component]---organelle+++cell part+++cell+++membrane+++membrane part+++organelle part+++[Molecular Function]---binding+++catalytic activity+++[Biological Process]---metabolic process+++cellular process
NM_001015521.1	SLC39A3	mRNA	[Cellular Component]---GO:0005886///plasma membrane+++GO:0016020///membrane+++GO:0016021///integral component of membrane+++[Molecular Function]---GO:0005385///zinc ion transmembrane transporter activity+++GO:0046873///metal ion transmembrane transporter activity+++[Biological Process]---GO:0000902///cell morphogenesis+++GO:0001701///in utero embryonic development+++GO:0006811///ion transport+++G…	cellular_component+++molecular_function+++biological_process	[Cellular Component]---membrane+++cell part+++cell+++membrane part+++[Molecular Function]---transporter activity+++[Biological Process]---developmental process+++cellular process+++cellular component organization or biogenesis+++multicellular organismal process+++localization+++immune system process+++biological regulation
NM_001015524.1	ASCC2	mRNA	[Cellular Component]---GO:0005634///nucleus+++GO:0099053///activating signal cointegrator 1 complex+++[Molecular Function]---GO:0043130///ubiquitin binding+++[Biological Process]---GO:0006355///regulation of transcription, DNA-templated	cellular_component+++molecular_function+++biological_process	[Cellular Component]---organelle+++cell part+++cell+++protein-containing complex+++[Molecular Function]---binding+++[Biological Process]---metabolic process+++regulation of biological process+++cellular process+++biological regulation
NM_001015527.1	GTF2F1	mRNA	[Cellular Component]---GO:0005634///nucleus+++GO:0005654///nucleoplasm+++GO:0005669///transcription factor TFIID complex+++GO:0005674///transcription factor TFIIF complex+++GO:0030054///cell junction+++GO:0032991///protein-containing complex+++GO:0043231///intracellular membrane-bounded organelle+++[Molecular Function]---GO:0001096///TFIIF-class transcription factor complex binding+++GO:0003677//…	cellular_component+++molecular_function+++biological_process	[Cellular Component]---organelle+++cell part+++cell+++membrane-enclosed lumen+++organelle part+++protein-containing complex+++cell junction+++[Molecular Function]---binding+++transcription regulator activity+++molecular function regulator+++[Biological Process]---metabolic process+++cellular process+++response to stimulus+++multi-organism process+++biological regulation+++regulation of biological…
NM_001015528.1	MVK	mRNA	[Cellular Component]---GO:0005737///cytoplasm+++GO:0005777///peroxisome+++GO:0005829///cytosol+++GO:0043231///intracellular membrane-bounded organelle+++[Molecular Function]---GO:0000166///nucleotide binding+++GO:0000287///magnesium ion binding+++GO:0004496///mevalonate kinase activity+++GO:0005524///ATP binding+++GO:0016301///kinase activity+++GO:0016740///transferase activity+++GO:0042802///ide…	cellular_component+++molecular_function+++biological_process	[Cellular Component]---cell part+++cell+++organelle+++[Molecular Function]---binding+++catalytic activity+++[Biological Process]---metabolic process+++cellular process+++regulation of biological process+++negative regulation of biological process+++response to stimulus+++biological regulation
NM_001015534.1	GALNT6	mRNA	[Cellular Component]---GO:0000139///Golgi membrane+++GO:0005794///Golgi apparatus+++GO:0016020///membrane+++GO:0016021///integral component of membrane+++GO:0048471///perinuclear region of cytoplasm+++[Molecular Function]---GO:0004653///polypeptide N-acetylgalactosaminyltransferase activity+++GO:0016740///transferase activity+++GO:0016757///transferase activity, transferring glycosyl groups+++GO:…	cellular_component+++molecular_function+++biological_process	[Cellular Component]---membrane+++organelle+++cell part+++cell+++organelle part+++membrane part+++[Molecular Function]---catalytic activity+++binding+++[Biological Process]---metabolic process+++cellular process
NM_001015535.1	ILVBL	mRNA	[Cellular Component]---GO:0005783///endoplasmic reticulum+++GO:0005789///endoplasmic reticulum membrane+++GO:0016020///membrane+++GO:0016021///integral component of membrane+++[Molecular Function]---GO:0000287///magnesium ion binding+++GO:0003824///catalytic activity+++GO:0003984///acetolactate synthase activity+++GO:0016740///transferase activity+++GO:0016829///lyase activity+++GO:0030976///thia…	cellular_component+++molecular_function+++biological_process	[Cellular Component]---organelle+++cell part+++cell+++membrane+++membrane part+++organelle part+++[Molecular Function]---binding+++catalytic activity+++[Biological Process]---metabolic process+++cellular process
NM_001015537.1	AGPAT4	mRNA	[Cellular Component]---GO:0005741///mitochondrial outer membrane+++GO:0005783///endoplasmic reticulum+++GO:0005789///endoplasmic reticulum membrane+++GO:0012505///endomembrane system+++GO:0016020///membrane+++GO:0016021///integral component of membrane+++[Molecular Function]---GO:0003841///1-acylglycerol-3-phosphate O-acyltransferase activity+++GO:0016740///transferase activity+++GO:0016746///tra…	cellular_component+++molecular_function+++biological_process	[Cellular Component]---organelle+++membrane+++cell part+++cell+++organelle part+++membrane part+++[Molecular Function]---catalytic activity+++[Biological Process]---metabolic process+++cellular process
NM_001015538.1	CNPPD1	mRNA	[Cellular Component]---GO:0000307///cyclin-dependent protein kinase holoenzyme complex+++GO:0005634///nucleus+++GO:0016020///membrane+++GO:0016021///integral component of membrane+++[Molecular Function]---GO:0016538///cyclin-dependent protein serine/threonine kinase regulator activity+++GO:0019901///protein kinase binding+++[Biological Process]---GO:0000079///regulation of cyclin-dependent protei…	cellular_component+++molecular_function+++biological_process	[Cellular Component]---cell part+++protein-containing complex+++cell+++organelle+++membrane+++membrane part+++[Molecular Function]---molecular function regulator+++binding+++[Biological Process]---metabolic process+++regulation of biological process+++cellular process+++biological regulation
NM_001015541.1	FIBIN	mRNA	[Cellular Component]---GO:0005576///extracellular region+++GO:0005783///endoplasmic reticulum+++GO:0005794///Golgi apparatus+++[Molecular Function]---GO:0042803///protein homodimerization activity+++[Biological Process]---GO:0010042///response to manganese ion+++GO:0070528///protein kinase C signaling+++GO:0071548///response to dexamethasone	cellular_component+++molecular_function+++biological_process	[Cellular Component]---extracellular region+++organelle+++cell part+++cell+++[Molecular Function]---binding+++[Biological Process]---response to stimulus+++regulation of biological process+++signaling+++cellular process+++biological regulation
NM_001015544.1	BCL2L14	mRNA	[Cellular Component]---GO:0005737///cytoplasm+++GO:0005829///cytosol+++GO:0043229///intracellular organelle+++[Molecular Function]---GO:0019901///protein kinase binding+++[Biological Process]---GO:0006915///apoptotic process+++GO:0042981///regulation of apoptotic process+++GO:2001236///regulation of extrinsic apoptotic signaling pathway	cellular_component+++molecular_function+++biological_process	[Cellular Component]---cell part+++cell+++organelle+++[Molecular Function]---binding+++[Biological Process]---cellular process+++regulation of biological process+++biological regulation+++response to stimulus+++signaling
NM_001015545.1	DHX58	mRNA	[Cellular Component]---GO:0005737///cytoplasm+++[Molecular Function]---GO:0003677///DNA binding+++GO:0003725///double-stranded RNA binding+++GO:0003727///single-stranded RNA binding+++GO:0005524///ATP binding+++GO:0008270///zinc ion binding+++GO:0016787///hydrolase activity+++GO:0046872///metal ion binding+++[Biological Process]---GO:0009615///response to virus+++GO:0009617///response to bacteriu…	cellular_component+++molecular_function+++biological_process	[Cellular Component]---cell part+++cell+++[Molecular Function]---binding+++catalytic activity+++[Biological Process]---response to stimulus+++multi-organism process+++regulation of biological process+++negative regulation of biological process+++multicellular organismal process+++biological regulation+++positive regulation of biological process+++immune system process+++signaling+++cellular proce…
NM_001015548.2	RPS6	mRNA	[Cellular Component]---GO:0005634///nucleus+++GO:0005737///cytoplasm+++GO:0005840///ribosome+++GO:0005844///polysome+++GO:0022627///cytosolic small ribosomal subunit+++GO:0030425///dendrite+++GO:0048471///perinuclear region of cytoplasm+++[Molecular Function]---GO:0003735///structural constituent of ribosome+++[Biological Process]---GO:0000082///G1/S transition of mitotic cell cycle+++GO:0000278/…	cellular_component+++molecular_function+++biological_process	[Cellular Component]---organelle+++cell part+++cell+++protein-containing complex+++organelle part+++[Molecular Function]---structural molecule activity+++[Biological Process]---cellular process+++reproduction+++developmental process+++reproductive process+++multicellular organismal process+++cell proliferation+++immune system process+++response to stimulus+++metabolic process+++cellular component…
NM_001015552.1	KCNA5	mRNA	[Cellular Component]---GO:0005886///plasma membrane+++GO:0005887///integral component of plasma membrane+++GO:0008076///voltage-gated potassium channel complex+++GO:0009986///cell surface+++GO:0014704///intercalated disc+++GO:0016020///membrane+++GO:0016021///integral component of membrane+++GO:0034705///potassium channel complex+++GO:0045121///membrane raft+++[Molecular Function]---GO:0005216///…	cellular_component+++molecular_function+++biological_process	[Cellular Component]---membrane+++cell part+++cell+++membrane part+++protein-containing complex+++cell junction+++[Molecular Function]---transporter activity+++binding+++[Biological Process]---localization+++regulation of biological process+++response to stimulus+++signaling+++cellular process+++biological regulation+++multicellular organismal process+++cellular component organization or biogenes…
NM_001015554.1	TTC4	mRNA	[Cellular Component]---GO:0005634///nucleus+++GO:0005654///nucleoplasm+++GO:0005737///cytoplasm+++[Biological Process]---GO:0002376///immune system process+++GO:0045087///innate immune response+++GO:0051607///defense response to virus	cellular_component+++biological_process	[Cellular Component]---organelle+++cell part+++cell+++membrane-enclosed lumen+++organelle part+++[Biological Process]---immune system process+++response to stimulus+++multi-organism process
NM_001015555.1	AUP1	mRNA	[Cellular Component]---GO:0000839///Hrd1p ubiquitin ligase ERAD-L complex+++GO:0016020///membrane+++GO:0016021///integral component of membrane+++GO:0030176///integral component of endoplasmic reticulum membrane+++[Molecular Function]---GO:0043130///ubiquitin binding+++GO:0097027///ubiquitin-protein transferase activator activity+++[Biological Process]---GO:0030433///ubiquitin-dependent ERAD path…	cellular_component+++molecular_function+++biological_process	[Cellular Component]---membrane+++organelle+++membrane part+++cell part+++protein-containing complex+++cell+++organelle part+++[Molecular Function]---binding+++molecular function regulator+++[Biological Process]---metabolic process+++response to stimulus+++cellular process+++localization+++biological regulation
NM_001015558.1	TMX2	mRNA	[Cellular Component]---GO:0005623///cell+++GO:0016020///membrane+++GO:0016021///integral component of membrane+++[Biological Process]---GO:0007420///brain development+++GO:0045454///cell redox homeostasis	cellular_component+++biological_process	[Cellular Component]---cell+++membrane+++membrane part+++[Biological Process]---developmental process+++multicellular organismal process+++regulation of biological process+++cellular process+++biological regulation
NM_001015562.1	NECAP2	mRNA	[Cellular Component]---GO:0005886///plasma membrane+++GO:0016020///membrane+++GO:0030125///clathrin vesicle coat+++GO:0030665///clathrin-coated vesicle membrane+++GO:0031410///cytoplasmic vesicle+++[Biological Process]---GO:0006897///endocytosis+++GO:0015031///protein transport	cellular_component+++biological_process	[Cellular Component]---membrane+++cell part+++cell+++organelle+++membrane part+++protein-containing complex+++organelle part+++[Biological Process]---localization
NM_001015563.1	PIGM	mRNA	[Cellular Component]---GO:0005783///endoplasmic reticulum+++GO:0005789///endoplasmic reticulum membrane+++GO:0016020///membrane+++GO:0016021///integral component of membrane+++GO:1990529///glycosylphosphatidylinositol-mannosyltransferase I complex+++[Molecular Function]---GO:0000030///mannosyltransferase activity+++GO:0016740///transferase activity+++GO:0016757///transferase activity, transferrin…	cellular_component+++molecular_function+++biological_process	[Cellular Component]---organelle+++cell part+++cell+++membrane+++membrane part+++organelle part+++protein-containing complex+++[Molecular Function]---catalytic activity+++[Biological Process]---metabolic process+++cellular process
NM_001015566.1	PSMA5	mRNA	[Cellular Component]---GO:0000502///proteasome complex+++GO:0005634///nucleus+++GO:0005737///cytoplasm+++GO:0005829///cytosol+++GO:0005839///proteasome core complex+++GO:0019773///proteasome core complex, alpha-subunit complex+++[Molecular Function]---GO:0004175///endopeptidase activity+++GO:0004298///threonine-type endopeptidase activity+++GO:0008233///peptidase activity+++GO:0016787///hydrolase…	cellular_component+++molecular_function+++biological_process	[Cellular Component]---cell part+++protein-containing complex+++cell+++organelle+++[Molecular Function]---catalytic activity+++[Biological Process]---metabolic process+++cellular process
NM_001015567.2	STRAP	mRNA	[Cellular Component]---GO:0005634///nucleus+++GO:0005737///cytoplasm+++GO:0005829///cytosol+++GO:0032797///SMN complex+++GO:0034719///SMN-Sm protein complex+++[Molecular Function]---GO:0005102///signaling receptor binding+++[Biological Process]---GO:0000122///negative regulation of transcription by RNA polymerase II+++GO:0000387///spliceosomal snRNP assembly+++GO:0006397///mRNA processing+++GO:00…	cellular_component+++molecular_function+++biological_process	[Cellular Component]---organelle+++cell part+++cell+++protein-containing complex+++[Molecular Function]---binding+++[Biological Process]---metabolic process+++regulation of biological process+++negative regulation of biological process+++cellular process+++biological regulation+++cellular component organization or biogenesis+++locomotion+++localization+++multicellular organismal process+++develop…
NM_001015568.1	OSER1	mRNA	[Biological Process]---GO:0070301///cellular response to hydrogen peroxide	biological_process	[Biological Process]---response to stimulus+++cellular process
NM_001015575.1	RNF25	mRNA	[Cellular Component]---GO:0005634///nucleus+++GO:0005829///cytosol+++[Molecular Function]---GO:0004842///ubiquitin-protein transferase activity+++GO:0016740///transferase activity+++GO:0046872///metal ion binding+++GO:0051059///NF-kappaB binding+++GO:0061630///ubiquitin protein ligase activity+++[Biological Process]---GO:0016567///protein ubiquitination+++GO:0051092///positive regulation of NF-ka…	cellular_component+++molecular_function+++biological_process	[Cellular Component]---organelle+++cell part+++cell+++[Molecular Function]---catalytic activity+++binding+++[Biological Process]---metabolic process+++cellular process+++regulation of biological process+++positive regulation of biological process+++biological regulation
NM_001015576.2	CXCL13	mRNA	[Cellular Component]---GO:0005576///extracellular region+++GO:0005615///extracellular space+++GO:0005623///cell+++[Molecular Function]---GO:0005125///cytokine activity+++GO:0008009///chemokine activity+++GO:0008201///heparin binding+++GO:0017134///fibroblast growth factor binding+++GO:0031724///CXCR5 chemokine receptor binding+++GO:0031735///CCR10 chemokine receptor binding+++GO:0045236///CXCR ch…	cellular_component+++molecular_function+++biological_process	[Cellular Component]---extracellular region+++extracellular region part+++cell+++[Molecular Function]---binding+++molecular function regulator+++[Biological Process]---locomotion+++response to stimulus+++immune system process+++regulation of biological process+++signaling+++cellular process+++biological regulation+++localization+++positive regulation of biological process+++multicellular organism…
NM_001015582.1	BRF2	mRNA	[Cellular Component]---GO:0000126///transcription factor TFIIIB complex+++GO:0005634///nucleus+++[Molecular Function]---GO:0001006///RNA polymerase III type 3 promoter sequence-specific DNA binding+++GO:0001032///RNA polymerase III type 3 promoter DNA binding+++GO:0008134///transcription factor binding+++GO:0046872///metal ion binding+++[Biological Process]---GO:0006352///DNA-templated transcript…	cellular_component+++molecular_function+++biological_process	[Cellular Component]---organelle+++cell part+++protein-containing complex+++cell+++organelle part+++[Molecular Function]---binding+++[Biological Process]---metabolic process+++cellular process+++regulation of biological process+++biological regulation+++response to stimulus+++cellular component organization or biogenesis
NM_001015584.1	WDR77	mRNA	[Cellular Component]---GO:0005634///nucleus+++GO:0005654///nucleoplasm+++GO:0005730///nucleolus+++GO:0005737///cytoplasm+++GO:0005794///Golgi apparatus+++GO:0005829///cytosol+++GO:0034709///methylosome+++[Molecular Function]---GO:0008327///methyl-CpG binding+++GO:0030374///nuclear receptor transcription coactivator activity+++[Biological Process]---GO:0006357///regulation of transcription by RNA …	cellular_component+++molecular_function+++biological_process	[Cellular Component]---organelle+++cell part+++cell+++membrane-enclosed lumen+++organelle part+++protein-containing complex+++[Molecular Function]---binding+++transcription regulator activity+++[Biological Process]---metabolic process+++regulation of biological process+++cellular process+++biological regulation+++cellular component organization or biogenesis+++cell proliferation+++positive regula…
NM_001015585.1	RAE1	mRNA	[Cellular Component]---GO:0000922///spindle pole+++GO:0005634///nucleus+++GO:0005635///nuclear envelope+++GO:0005643///nuclear pore+++GO:0005737///cytoplasm+++GO:0005856///cytoskeleton+++GO:0097431///mitotic spindle pole+++[Molecular Function]---GO:0003723///RNA binding+++GO:0043130///ubiquitin binding+++[Biological Process]---GO:0000972///transcription-dependent tethering of RNA polymerase II ge…	cellular_component+++molecular_function+++biological_process	[Cellular Component]---organelle+++cell part+++cell+++organelle part+++protein-containing complex+++[Molecular Function]---binding+++[Biological Process]---cellular process+++cellular component organization or biogenesis+++localization+++metabolic process+++regulation of biological process+++biological regulation+++response to stimulus
NM_001015588.3	MMACHC	mRNA	[Cellular Component]---GO:0005737///cytoplasm+++[Molecular Function]---GO:0016491///oxidoreductase activity+++GO:0031419///cobalamin binding+++GO:0032451///demethylase activity+++GO:0033787///cyanocobalamin reductase (cyanide-eliminating) activity+++GO:0042803///protein homodimerization activity+++GO:0043295///glutathione binding+++GO:0071949///FAD binding+++[Biological Process]---GO:0006749///gl…	cellular_component+++molecular_function+++biological_process	[Cellular Component]---cell part+++cell+++[Molecular Function]---catalytic activity+++binding+++[Biological Process]---metabolic process+++cellular process
NM_001015593.1	EIF2B2	mRNA	[Cellular Component]---GO:0005737///cytoplasm+++GO:0005851///eukaryotic translation initiation factor 2B complex+++[Molecular Function]---GO:0003743///translation initiation factor activity+++GO:0005085///guanyl-nucleotide exchange factor activity+++GO:0005524///ATP binding+++GO:0005525///GTP binding+++[Biological Process]---GO:0001541///ovarian follicle development+++GO:0006412///translation+++G…	cellular_component+++molecular_function+++biological_process	[Cellular Component]---cell part+++cell+++protein-containing complex+++[Molecular Function]---binding+++molecular function regulator+++[Biological Process]---developmental process+++reproduction+++reproductive process+++multicellular organismal process+++metabolic process+++cellular process+++regulation of biological process+++biological regulation+++immune system process+++signaling+++response t…
NM_001015596.1	PARL	mRNA	[Cellular Component]---GO:0005634///nucleus+++GO:0005739///mitochondrion+++GO:0005743///mitochondrial inner membrane+++GO:0016020///membrane+++GO:0016021///integral component of membrane+++[Molecular Function]---GO:0004175///endopeptidase activity+++GO:0004252///serine-type endopeptidase activity+++GO:0008233///peptidase activity+++GO:0008236///serine-type peptidase activity+++GO:0016787///hydrol…	cellular_component+++molecular_function+++biological_process	[Cellular Component]---organelle+++cell part+++cell+++membrane+++organelle part+++membrane part+++[Molecular Function]---catalytic activity+++[Biological Process]---metabolic process+++regulation of biological process+++cellular process+++cellular component organization or biogenesis+++biological regulation+++negative regulation of biological process+++response to stimulus+++signaling
NM_001015601.1	RASGEF1A	mRNA	[Molecular Function]---GO:0005085///guanyl-nucleotide exchange factor activity+++GO:0005088///Ras guanyl-nucleotide exchange factor activity+++[Biological Process]---GO:0007264///small GTPase mediated signal transduction+++GO:0016477///cell migration+++GO:0046579///positive regulation of Ras protein signal transduction	molecular_function+++biological_process	[Molecular Function]---binding+++molecular function regulator+++[Biological Process]---regulation of biological process+++response to stimulus+++signaling+++cellular process+++biological regulation+++locomotion+++localization+++positive regulation of biological process
NM_001015605.1	ETNPPL	mRNA	[Cellular Component]---GO:0005739///mitochondrion+++[Molecular Function]---GO:0003824///catalytic activity+++GO:0008483///transaminase activity+++GO:0016829///lyase activity+++GO:0030170///pyridoxal phosphate binding+++GO:0050459///ethanolamine-phosphate phospho-lyase activity	cellular_component+++molecular_function	[Cellular Component]---organelle+++cell part+++cell+++[Molecular Function]---catalytic activity+++binding
NM_001015606.2	ABHD10	mRNA	[Cellular Component]---GO:0005739///mitochondrion+++GO:0005829///cytosol+++[Molecular Function]---GO:0004553///hydrolase activity, hydrolyzing O-glycosyl compounds+++GO:0016787///hydrolase activity+++GO:0102390///mycophenolic acid acyl-glucuronide esterase activity+++[Biological Process]---GO:0019391///glucuronoside catabolic process	cellular_component+++molecular_function+++biological_process	[Cellular Component]---organelle+++cell part+++cell+++[Molecular Function]---catalytic activity+++[Biological Process]---metabolic process+++cellular process
NM_001015609.1	B4GALT3	mRNA	[Cellular Component]---GO:0005794///Golgi apparatus+++GO:0005829///cytosol+++GO:0016020///membrane+++GO:0016021///integral component of membrane+++GO:0032580///Golgi cisterna membrane+++[Molecular Function]---GO:0003831///beta-N-acetylglucosaminylglycopeptide beta-1,4-galactosyltransferase activity+++GO:0003945///N-acetyllactosamine synthase activity+++GO:0008378///galactosyltransferase activity+…	cellular_component+++molecular_function+++biological_process	[Cellular Component]---organelle+++cell part+++cell+++membrane+++membrane part+++organelle part+++[Molecular Function]---catalytic activity+++binding+++[Biological Process]---metabolic process+++cellular process
NM_001015610.1	PLA1A	mRNA	[Cellular Component]---GO:0005576///extracellular region+++GO:0005615///extracellular space+++[Molecular Function]---GO:0004620///phospholipase activity+++GO:0016298///lipase activity+++GO:0016787///hydrolase activity+++GO:0052689///carboxylic ester hydrolase activity+++[Biological Process]---GO:0006629///lipid metabolic process+++GO:0016042///lipid catabolic process	cellular_component+++molecular_function+++biological_process	[Cellular Component]---extracellular region+++extracellular region part+++[Molecular Function]---catalytic activity+++[Biological Process]---metabolic process
NM_001015614.1	RABGGTA	mRNA	[Cellular Component]---GO:0005654///nucleoplasm+++GO:0005737///cytoplasm+++GO:0005968///Rab-protein geranylgeranyltransferase complex+++[Molecular Function]---GO:0004659///prenyltransferase activity+++GO:0004663///Rab geranylgeranyltransferase activity+++GO:0008270///zinc ion binding+++GO:0008318///protein prenyltransferase activity+++GO:0016740///transferase activity+++GO:0017137///Rab GTPase bi…	cellular_component+++molecular_function+++biological_process	[Cellular Component]---membrane-enclosed lumen+++organelle+++cell part+++cell+++organelle part+++protein-containing complex+++[Molecular Function]---catalytic activity+++binding+++[Biological Process]---metabolic process+++cellular process
NM_001015615.1	PSMB2	mRNA	[Cellular Component]---GO:0000502///proteasome complex+++GO:0005634///nucleus+++GO:0005654///nucleoplasm+++GO:0005737///cytoplasm+++GO:0005839///proteasome core complex+++GO:0019774///proteasome core complex, beta-subunit complex+++[Molecular Function]---GO:0004175///endopeptidase activity+++GO:0004298///threonine-type endopeptidase activity+++GO:0008233///peptidase activity+++GO:0016787///hydrol…	cellular_component+++molecular_function+++biological_process	[Cellular Component]---cell part+++protein-containing complex+++cell+++organelle+++membrane-enclosed lumen+++organelle part+++[Molecular Function]---catalytic activity+++[Biological Process]---metabolic process+++cellular process
NM_001015625.1	CLPB	mRNA	[Cellular Component]---GO:0005739///mitochondrion+++[Molecular Function]---GO:0000166///nucleotide binding+++GO:0005524///ATP binding+++GO:0016787///hydrolase activity+++GO:0016887///ATPase activity+++[Biological Process]---GO:0034605///cellular response to heat	cellular_component+++molecular_function+++biological_process	[Cellular Component]---organelle+++cell part+++cell+++[Molecular Function]---binding+++catalytic activity+++[Biological Process]---response to stimulus+++cellular process
NM_001015626.1	NHP2	mRNA	[Cellular Component]---GO:0005634///nucleus+++GO:0005697///telomerase holoenzyme complex+++GO:0005730///nucleolus+++GO:0015030///Cajal body+++GO:0031429///box H/ACA snoRNP complex+++GO:0090661///box H/ACA telomerase RNP complex+++[Molecular Function]---GO:0003723///RNA binding+++GO:0034513///box H/ACA snoRNA binding+++GO:0070034///telomerase RNA binding+++[Biological Process]---GO:0000469///cleav…	cellular_component+++molecular_function+++biological_process	[Cellular Component]---organelle+++cell part+++cell+++protein-containing complex+++organelle part+++membrane-enclosed lumen+++[Molecular Function]---binding+++[Biological Process]---metabolic process+++cellular process+++cellular component organization or biogenesis+++biological regulation
NM_001015627.2	RIC8A	mRNA	[Cellular Component]---GO:0005737///cytoplasm+++GO:0005886///plasma membrane+++GO:0016020///membrane+++[Molecular Function]---GO:0001965///G-protein alpha-subunit binding+++GO:0005085///guanyl-nucleotide exchange factor activity+++GO:0005096///GTPase activator activity+++[Biological Process]---GO:0001701///in utero embryonic development+++GO:0001944///vasculature development+++GO:0007186///G prot…	cellular_component+++molecular_function+++biological_process	[Cellular Component]---cell part+++cell+++membrane+++[Molecular Function]---binding+++molecular function regulator+++[Biological Process]---developmental process+++multicellular organismal process+++regulation of biological process+++response to stimulus+++signaling+++cellular process+++biological regulation+++behavior+++locomotion+++localization+++biological adhesion+++cellular component organiz…
NM_001015628.1	EIF3I	mRNA	[Cellular Component]---GO:0005737///cytoplasm+++GO:0005852///eukaryotic translation initiation factor 3 complex+++GO:0016282///eukaryotic 43S preinitiation complex+++GO:0033290///eukaryotic 48S preinitiation complex+++GO:0071541///eukaryotic translation initiation factor 3 complex, eIF3m+++[Molecular Function]---GO:0003723///RNA binding+++GO:0003743///translation initiation factor activity+++[Bio…	cellular_component+++molecular_function+++biological_process	[Cellular Component]---cell part+++cell+++protein-containing complex+++[Molecular Function]---binding+++[Biological Process]---metabolic process+++cellular process+++cellular component organization or biogenesis
NM_001015631.2	RTCB	mRNA	[Cellular Component]---GO:0005634///nucleus+++GO:0005635///nuclear envelope+++GO:0005654///nucleoplasm+++GO:0005737///cytoplasm+++GO:0005789///endoplasmic reticulum membrane+++GO:0005829///cytosol+++GO:0043231///intracellular membrane-bounded organelle+++GO:0072669///tRNA-splicing ligase complex+++[Molecular Function]---GO:0000166///nucleotide binding+++GO:0003972///RNA ligase (ATP) activity+++GO…	cellular_component+++molecular_function+++biological_process	[Cellular Component]---organelle+++cell part+++cell+++organelle part+++membrane-enclosed lumen+++membrane+++membrane part+++protein-containing complex+++[Molecular Function]---binding+++catalytic activity+++[Biological Process]---metabolic process+++cellular process+++developmental process+++multicellular organismal process+++reproduction+++reproductive process
NM_001015635.2	RASL11B	mRNA	[Cellular Component]---GO:0016020///membrane+++[Molecular Function]---GO:0000166///nucleotide binding+++GO:0003924///GTPase activity+++GO:0005160///transforming growth factor beta receptor binding+++GO:0005525///GTP binding+++[Biological Process]---GO:0007165///signal transduction+++GO:0030512///negative regulation of transforming growth factor beta receptor signaling pathway	cellular_component+++molecular_function+++biological_process	[Cellular Component]---membrane+++[Molecular Function]---binding+++catalytic activity+++[Biological Process]---regulation of biological process+++response to stimulus+++signaling+++cellular process+++biological regulation+++negative regulation of biological process
NM_001015641.1	RRNAD1	mRNA	[Cellular Component]---GO:0016020///membrane+++GO:0016021///integral component of membrane+++[Molecular Function]---GO:0000179///rRNA (adenine-N6,N6-)-dimethyltransferase activity+++GO:0008649///rRNA methyltransferase activity+++[Biological Process]---GO:0000154///rRNA modification+++GO:0031167///rRNA methylation	cellular_component+++molecular_function+++biological_process	[Cellular Component]---membrane+++membrane part+++[Molecular Function]---catalytic activity+++[Biological Process]---metabolic process+++cellular process+++cellular component organization or biogenesis
NM_001015644.1	CYP20A1	mRNA	[Cellular Component]---GO:0016020///membrane+++GO:0016021///integral component of membrane+++[Molecular Function]---GO:0004497///monooxygenase activity+++GO:0005506///iron ion binding+++GO:0016491///oxidoreductase activity+++GO:0016705///oxidoreductase activity, acting on paired donors, with incorporation or reduction of molecular oxygen+++GO:0020037///heme binding+++GO:0046872///metal ion bindin…	cellular_component+++molecular_function+++biological_process	[Cellular Component]---membrane+++membrane part+++[Molecular Function]---catalytic activity+++binding+++[Biological Process]---metabolic process
NM_001015646.1	RABGGTB	mRNA	[Cellular Component]---GO:0005968///Rab-protein geranylgeranyltransferase complex+++[Molecular Function]---GO:0003824///catalytic activity+++GO:0004659///prenyltransferase activity+++GO:0004663///Rab geranylgeranyltransferase activity+++GO:0008270///zinc ion binding+++GO:0016740///transferase activity+++GO:0017137///Rab GTPase binding+++GO:0046872///metal ion binding+++[Biological Process]---GO:0…	cellular_component+++molecular_function+++biological_process	[Cellular Component]---cell part+++protein-containing complex+++cell+++[Molecular Function]---catalytic activity+++binding+++[Biological Process]---metabolic process+++cellular process
NM_001015649.2	DNAJC18	mRNA	[Cellular Component]---GO:0005789///endoplasmic reticulum membrane+++GO:0016020///membrane+++GO:0016021///integral component of membrane+++[Molecular Function]---GO:0030544///Hsp70 protein binding+++[Biological Process]---GO:0030433///ubiquitin-dependent ERAD pathway+++GO:0051085///chaperone cofactor-dependent protein refolding+++GO:0071218///cellular response to misfolded protein	cellular_component+++molecular_function+++biological_process	[Cellular Component]---organelle+++membrane+++cell part+++membrane part+++cell+++organelle part+++[Molecular Function]---binding+++[Biological Process]---metabolic process+++response to stimulus+++cellular process
NM_001015653.1	MGAT1	mRNA	[Cellular Component]---GO:0000139///Golgi membrane+++GO:0005794///Golgi apparatus+++GO:0016020///membrane+++GO:0016021///integral component of membrane+++[Molecular Function]---GO:0003827///alpha-1,3-mannosylglycoprotein 2-beta-N-acetylglucosaminyltransferase activity+++GO:0008375///acetylglucosaminyltransferase activity+++GO:0016740///transferase activity+++GO:0016757///transferase activity, tra…	cellular_component+++molecular_function+++biological_process	[Cellular Component]---membrane+++organelle+++cell part+++cell+++organelle part+++membrane part+++[Molecular Function]---catalytic activity+++binding+++[Biological Process]---developmental process+++multicellular organismal process+++metabolic process+++cellular process
NM_001015654.1	SP2	mRNA	[Cellular Component]---GO:0005634///nucleus+++GO:0005654///nucleoplasm+++[Molecular Function]---GO:0000978///RNA polymerase II proximal promoter sequence-specific DNA binding+++GO:0000981///DNA-binding transcription factor activity, RNA polymerase II-specific+++GO:0001227///DNA-binding transcription repressor activity, RNA polymerase II-specific+++GO:0003676///nucleic acid binding+++GO:0003677///…	cellular_component+++molecular_function+++biological_process	[Cellular Component]---organelle+++cell part+++cell+++membrane-enclosed lumen+++organelle part+++[Molecular Function]---binding+++transcription regulator activity+++[Biological Process]---metabolic process+++regulation of biological process+++negative regulation of biological process+++cellular process+++biological regulation+++developmental process+++growth+++multicellular organismal process+++p…
NM_001015656.1	NME7	mRNA	[Cellular Component]---GO:0005813///centrosome+++[Molecular Function]---GO:0000166///nucleotide binding+++GO:0004550///nucleoside diphosphate kinase activity+++GO:0005524///ATP binding+++GO:0016301///kinase activity+++GO:0016740///transferase activity+++GO:0046872///metal ion binding+++[Biological Process]---GO:0006165///nucleoside diphosphate phosphorylation+++GO:0006183///GTP biosynthetic proce…	cellular_component+++molecular_function+++biological_process	[Cellular Component]---organelle+++cell part+++cell+++organelle part+++[Molecular Function]---binding+++catalytic activity+++[Biological Process]---metabolic process+++cellular process
NM_001015659.1	CIAPIN1	mRNA	[Cellular Component]---GO:0005634///nucleus+++GO:0005654///nucleoplasm+++GO:0005730///nucleolus+++GO:0005737///cytoplasm+++GO:0005739///mitochondrion+++GO:0005758///mitochondrial intermembrane space+++[Molecular Function]---GO:0009055///electron transfer activity+++GO:0046872///metal ion binding+++GO:0051536///iron-sulfur cluster binding+++GO:0051537///2 iron, 2 sulfur cluster binding+++GO:005153…	cellular_component+++molecular_function+++biological_process	[Cellular Component]---organelle+++cell part+++cell+++membrane-enclosed lumen+++organelle part+++[Molecular Function]---catalytic activity+++binding+++[Biological Process]---cellular process+++metabolic process+++cellular component organization or biogenesis+++developmental process+++immune system process+++multicellular organismal process+++regulation of biological process+++negative regulation …
NM_001015660.1	FAM76A	mRNA	[Cellular Component]---GO:0005654///nucleoplasm	cellular_component	[Cellular Component]---membrane-enclosed lumen+++organelle+++cell part+++cell+++organelle part
NM_001015663.1	UFC1	mRNA	[Molecular Function]---GO:0061657///UFM1 conjugating enzyme activity+++GO:0071568///UFM1 transferase activity+++[Biological Process]---GO:0007420///brain development+++GO:0034976///response to endoplasmic reticulum stress+++GO:0071569///protein ufmylation+++GO:1990592///protein K69-linked ufmylation	molecular_function+++biological_process	[Molecular Function]---catalytic activity+++[Biological Process]---developmental process+++multicellular organismal process+++response to stimulus+++cellular process+++metabolic process
NM_001015667.3	FBXO8	mRNA	[Cellular Component]---GO:0000151///ubiquitin ligase complex+++[Molecular Function]---GO:0005085///guanyl-nucleotide exchange factor activity+++GO:0005086///ARF guanyl-nucleotide exchange factor activity+++[Biological Process]---GO:0006511///ubiquitin-dependent protein catabolic process+++GO:0032012///regulation of ARF protein signal transduction	cellular_component+++molecular_function+++biological_process	[Cellular Component]---cell part+++protein-containing complex+++cell+++[Molecular Function]---binding+++molecular function regulator+++[Biological Process]---metabolic process+++cellular process+++regulation of biological process+++response to stimulus+++signaling+++biological regulation
NM_001015669.1	BRINP1	mRNA	[Cellular Component]---GO:0005737///cytoplasm+++GO:0005783///endoplasmic reticulum+++GO:0030425///dendrite+++GO:0043025///neuronal cell body+++[Biological Process]---GO:0001662///behavioral fear response+++GO:0007049///cell cycle+++GO:0007050///cell cycle arrest+++GO:0007614///short-term memory+++GO:0008219///cell death+++GO:0035176///social behavior+++GO:0035640///exploration behavior+++GO:00427…	cellular_component+++biological_process	[Cellular Component]---cell part+++cell+++organelle+++[Biological Process]---behavior+++response to stimulus+++multicellular organismal process+++cellular process+++regulation of biological process+++negative regulation of biological process+++biological regulation+++multi-organism process+++reproduction+++reproductive process+++developmental process+++positive regulation of biological process
NM_001015675.1	RIOX2	mRNA	[Cellular Component]---GO:0005634///nucleus+++GO:0005654///nucleoplasm+++GO:0005667///transcription factor complex+++GO:0005730///nucleolus+++GO:0005829///cytosol+++[Molecular Function]---GO:0003714///transcription corepressor activity+++GO:0005506///iron ion binding+++GO:0016491///oxidoreductase activity+++GO:0016706///oxidoreductase activity, acting on paired donors, with incorporation or reduc…	cellular_component+++molecular_function+++biological_process	[Cellular Component]---organelle+++cell part+++cell+++membrane-enclosed lumen+++organelle part+++protein-containing complex+++[Molecular Function]---transcription regulator activity+++binding+++catalytic activity+++[Biological Process]---metabolic process+++cellular process+++cellular component organization or biogenesis+++regulation of biological process+++negative regulation of biological proce…
NM_001015680.1	NAPEPLD	mRNA	[Cellular Component]---GO:0000139///Golgi membrane+++GO:0005634///nucleus+++GO:0005635///nuclear envelope+++GO:0005654///nucleoplasm+++GO:0005737///cytoplasm+++GO:0005768///endosome+++GO:0005769///early endosome+++GO:0005794///Golgi apparatus+++GO:0005829///cytosol+++GO:0016020///membrane+++GO:0031901///early endosome membrane+++GO:0043227///membrane-bounded organelle+++[Molecular Function]---GO:…	cellular_component+++molecular_function+++biological_process	[Cellular Component]---membrane+++organelle+++cell part+++cell+++organelle part+++membrane-enclosed lumen+++[Molecular Function]---binding+++catalytic activity+++[Biological Process]---multicellular organismal process+++biological regulation+++metabolic process+++cellular process+++multi-organism process+++regulation of biological process+++response to stimulus+++positive regulation of biological…
NM_001017934.3	CCT3	mRNA	[Cellular Component]---GO:0002199///zona pellucida receptor complex+++GO:0005737///cytoplasm+++GO:0005829///cytosol+++GO:0005832///chaperonin-containing T-complex+++GO:0005874///microtubule+++GO:0005886///plasma membrane+++GO:0044297///cell body+++[Molecular Function]---GO:0000166///nucleotide binding+++GO:0005524///ATP binding+++GO:0051082///unfolded protein binding+++[Biological Process]---GO:0…	cellular_component+++molecular_function+++biological_process	[Cellular Component]---protein-containing complex+++cell part+++cell+++organelle+++supramolecular complex+++organelle part+++membrane+++[Molecular Function]---binding+++[Biological Process]---cellular process+++reproduction+++reproductive process+++multi-organism process+++metabolic process+++regulation of biological process+++positive regulation of biological process+++cellular component organiz…
NM_001017935.1	ENTPD3	mRNA	[Cellular Component]---GO:0005886///plasma membrane+++GO:0016020///membrane+++GO:0016021///integral component of membrane+++[Molecular Function]---GO:0000166///nucleotide binding+++GO:0005524///ATP binding+++GO:0016787///hydrolase activity+++GO:0017110///nucleoside-diphosphatase activity+++GO:0017111///nucleoside-triphosphatase activity+++[Biological Process]---GO:0009134///nucleoside diphosphate…	cellular_component+++molecular_function+++biological_process	[Cellular Component]---membrane+++cell part+++cell+++membrane part+++[Molecular Function]---binding+++catalytic activity+++[Biological Process]---metabolic process+++cellular process
NM_001017936.1	RAB25	mRNA	[Cellular Component]---GO:0005768///endosome+++GO:0005886///plasma membrane+++GO:0012505///endomembrane system+++GO:0016020///membrane+++GO:0031143///pseudopodium+++GO:0031260///pseudopodium membrane+++GO:0031410///cytoplasmic vesicle+++GO:0042995///cell projection+++GO:0055037///recycling endosome+++[Molecular Function]---GO:0000166///nucleotide binding+++GO:0003924///GTPase activity+++GO:000552…	cellular_component+++molecular_function+++biological_process	[Cellular Component]---organelle+++cell part+++cell+++membrane+++membrane part+++[Molecular Function]---binding+++catalytic activity+++[Biological Process]---developmental process+++cellular process+++cellular component organization or biogenesis+++localization+++regulation of biological process+++cell proliferation+++positive regulation of biological process+++biological regulation+++locomotion+…
NM_001017943.1	B4GALNT1	mRNA	[Cellular Component]---GO:0000139///Golgi membrane+++GO:0005794///Golgi apparatus+++GO:0016020///membrane+++GO:0030173///integral component of Golgi membrane+++[Molecular Function]---GO:0003947///(N-acetylneuraminyl)-galactosylglucosylceramide N-acetylgalactosaminyltransferase activity+++GO:0008376///acetylgalactosaminyltransferase activity+++GO:0016740///transferase activity+++GO:0016757///trans…	cellular_component+++molecular_function+++biological_process	[Cellular Component]---membrane+++organelle+++cell part+++cell+++organelle part+++membrane part+++[Molecular Function]---catalytic activity+++[Biological Process]---metabolic process+++cellular process+++reproduction+++reproductive process+++multicellular organismal process+++multi-organism process+++localization+++biological regulation
NM_001017950.2	FSTL1	mRNA	[Cellular Component]---GO:0005576///extracellular region+++[Molecular Function]---GO:0005509///calcium ion binding+++GO:0008201///heparin binding+++[Biological Process]---GO:0007275///multicellular organism development+++GO:0030154///cell differentiation+++GO:0030510///regulation of BMP signaling pathway+++GO:0042594///response to starvation	cellular_component+++molecular_function+++biological_process	[Cellular Component]---extracellular region+++[Molecular Function]---binding+++[Biological Process]---developmental process+++multicellular organismal process+++cellular process+++metabolic process+++regulation of biological process+++response to stimulus+++signaling+++biological regulation
NM_001017953.2	PDGFB	mRNA	[Cellular Component]---GO:0005615///extracellular space+++GO:0009986///cell surface+++GO:0016020///membrane+++[Molecular Function]---GO:0005161///platelet-derived growth factor receptor binding+++GO:0005518///collagen binding+++GO:0008083///growth factor activity+++GO:0016176///superoxide-generating NADPH oxidase activator activity+++GO:0042056///chemoattractant activity+++GO:0042802///identical …	cellular_component+++molecular_function+++biological_process	[Cellular Component]---extracellular region part+++extracellular region+++cell part+++cell+++membrane+++[Molecular Function]---binding+++molecular function regulator+++[Biological Process]---regulation of biological process+++cell proliferation+++positive regulation of biological process+++cellular process+++biological regulation+++immune system process+++locomotion+++response to stimulus+++local…
NM_001024475.1	PISD	mRNA	[Cellular Component]---GO:0005739///mitochondrion+++GO:0005743///mitochondrial inner membrane+++GO:0016020///membrane+++GO:0016021///integral component of membrane+++GO:0031305///integral component of mitochondrial inner membrane+++[Molecular Function]---GO:0004609///phosphatidylserine decarboxylase activity+++GO:0016829///lyase activity+++GO:0016831///carboxy-lyase activity+++[Biological Process…	cellular_component+++molecular_function+++biological_process	[Cellular Component]---organelle+++cell part+++cell+++membrane+++organelle part+++membrane part+++[Molecular Function]---catalytic activity+++[Biological Process]---metabolic process+++cellular process
NM_001024479.2	PCMTD2	mRNA	[Cellular Component]---GO:0005737///cytoplasm+++GO:0016020///membrane+++[Molecular Function]---GO:0004719///protein-L-isoaspartate (D-aspartate) O-methyltransferase activity+++[Biological Process]---GO:0006464///cellular protein modification process+++GO:0006479///protein methylation	cellular_component+++molecular_function+++biological_process	[Cellular Component]---cell part+++cell+++membrane+++[Molecular Function]---catalytic activity+++[Biological Process]---metabolic process+++cellular process
NM_001024484.2	DCTN5	mRNA	[Cellular Component]---GO:0005654///nucleoplasm+++GO:0005813///centrosome+++GO:0031965///nuclear membrane+++[Biological Process]---GO:0003281///ventricular septum development+++GO:0035904///aorta development+++GO:0060976///coronary vasculature development	cellular_component+++biological_process	[Cellular Component]---membrane-enclosed lumen+++organelle+++cell part+++cell+++organelle part+++membrane+++[Biological Process]---developmental process+++multicellular organismal process
NM_001024487.1	PI16	mRNA	[Cellular Component]---GO:0005576///extracellular region+++GO:0005615///extracellular space+++[Molecular Function]---GO:0030414///peptidase inhibitor activity+++[Biological Process]---GO:0010466///negative regulation of peptidase activity+++GO:0061052///negative regulation of cell growth involved in cardiac muscle cell development	cellular_component+++molecular_function+++biological_process	[Cellular Component]---extracellular region+++extracellular region part+++[Molecular Function]---molecular function regulator+++[Biological Process]---metabolic process+++regulation of biological process+++negative regulation of biological process+++cellular process+++biological regulation+++developmental process+++response to stimulus+++growth+++multicellular organismal process+++cellular compon…
NM_001024494.1	NECTIN4	mRNA	[Cellular Component]---GO:0005886///plasma membrane+++GO:0005912///adherens junction+++GO:0016020///membrane+++GO:0016021///integral component of membrane+++GO:0030054///cell junction+++[Molecular Function]---GO:0038023///signaling receptor activity+++GO:0042802///identical protein binding+++GO:0042803///protein homodimerization activity+++GO:0050839///cell adhesion molecule binding+++[Biological…	cellular_component+++molecular_function+++biological_process	[Cellular Component]---membrane+++cell part+++cell+++cell junction+++membrane part+++[Molecular Function]---molecular transducer activity+++binding+++[Biological Process]---biological adhesion+++multi-organism process
NM_001024495.1	PRMT2	mRNA	[Cellular Component]---GO:0005634///nucleus+++GO:0005654///nucleoplasm+++GO:0005737///cytoplasm+++GO:0005829///cytosol+++[Molecular Function]---GO:0003713///transcription coactivator activity+++GO:0008168///methyltransferase activity+++GO:0016274///protein-arginine N-methyltransferase activity+++GO:0016740///transferase activity+++GO:0030331///estrogen receptor binding+++GO:0033142///progesterone…	cellular_component+++molecular_function+++biological_process	[Cellular Component]---organelle+++cell part+++cell+++membrane-enclosed lumen+++organelle part+++[Molecular Function]---transcription regulator activity+++catalytic activity+++binding+++[Biological Process]---metabolic process+++cellular process+++cellular component organization or biogenesis+++regulation of biological process+++negative regulation of biological process+++biological regulation+++…
NM_001024497.3	ANKZF1	mRNA	[Cellular Component]---GO:0005737///cytoplasm+++GO:0036266///Cdc48p-Npl4p-Vms1p AAA ATPase complex+++[Molecular Function]---GO:0003676///nucleic acid binding+++GO:0046872///metal ion binding+++[Biological Process]---GO:0030433///ubiquitin-dependent ERAD pathway+++GO:0070301///cellular response to hydrogen peroxide+++GO:0071630///nuclear protein quality control by the ubiquitin-proteasome system++…	cellular_component+++molecular_function+++biological_process	[Cellular Component]---cell part+++cell+++organelle+++membrane+++membrane part+++protein-containing complex+++organelle part+++[Molecular Function]---binding+++[Biological Process]---metabolic process+++response to stimulus+++cellular process
NM_001024499.1	POLR3D	mRNA	[Cellular Component]---GO:0000790///nuclear chromatin+++GO:0005634///nucleus+++GO:0005654///nucleoplasm+++GO:0005666///RNA polymerase III complex+++GO:0005829///cytosol+++GO:0016607///nuclear speck+++[Molecular Function]---GO:0003677///DNA binding+++GO:0003682///chromatin binding+++GO:0003899///DNA-directed 5'-3' RNA polymerase activity+++[Biological Process]---GO:0002376///immune system process+…	cellular_component+++molecular_function+++biological_process	[Cellular Component]---membrane-enclosed lumen+++organelle+++cell part+++cell+++organelle part+++protein-containing complex+++[Molecular Function]---binding+++catalytic activity+++[Biological Process]---immune system process+++metabolic process+++cellular process+++regulation of biological process+++positive regulation of biological process+++multicellular organismal process+++biological regulati…
NM_001024503.1	ZBTB43	mRNA	[Cellular Component]---GO:0005634///nucleus+++[Molecular Function]---GO:0003676///nucleic acid binding+++GO:0003677///DNA binding+++[Biological Process]---GO:0006357///regulation of transcription by RNA polymerase II	cellular_component+++molecular_function+++biological_process	[Cellular Component]---organelle+++cell part+++cell+++[Molecular Function]---binding+++[Biological Process]---metabolic process+++regulation of biological process+++cellular process+++biological regulation
NM_001024505.3	ELMO1	mRNA	[Cellular Component]---GO:0005737///cytoplasm+++GO:0005886///plasma membrane+++GO:0032045///guanyl-nucleotide exchange factor complex+++[Molecular Function]---GO:0005085///guanyl-nucleotide exchange factor activity+++GO:0017124///SH3 domain binding+++GO:0048365///Rac GTPase binding+++[Biological Process]---GO:0006909///phagocytosis+++GO:0006911///phagocytosis, engulfment+++GO:0007015///actin fila…	cellular_component+++molecular_function+++biological_process	[Cellular Component]---cell part+++cell+++membrane+++protein-containing complex+++[Molecular Function]---binding+++molecular function regulator+++[Biological Process]---localization+++cellular process+++cellular component organization or biogenesis+++locomotion+++regulation of biological process+++response to stimulus+++signaling+++biological regulation
NM_001024506.1	IRF9	mRNA	[Cellular Component]---GO:0005634///nucleus+++GO:0005829///cytosol+++[Molecular Function]---GO:0000978///RNA polymerase II proximal promoter sequence-specific DNA binding+++GO:0000981///DNA-binding transcription factor activity, RNA polymerase II-specific+++GO:0003700///DNA-binding transcription factor activity+++GO:0044212///transcription regulatory region DNA binding+++[Biological Process]---GO…	cellular_component+++molecular_function+++biological_process	[Cellular Component]---organelle+++cell part+++cell+++[Molecular Function]---binding+++transcription regulator activity+++[Biological Process]---immune system process+++metabolic process+++regulation of biological process+++cellular process+++biological regulation
NM_001024507.1	SESN2	mRNA	[Cellular Component]---GO:0005634///nucleus+++GO:0005737///cytoplasm+++GO:0005739///mitochondrion+++GO:0031588///nucleotide-activated protein kinase complex+++GO:0031932///TORC2 complex+++GO:0061700///GATOR2 complex+++GO:1990316///Atg1/ULK1 kinase complex+++[Molecular Function]---GO:0005092///GDP-dissociation inhibitor activity+++GO:0016491///oxidoreductase activity+++GO:0016684///oxidoreductase …	cellular_component+++molecular_function+++biological_process	[Cellular Component]---organelle+++cell part+++cell+++protein-containing complex+++[Molecular Function]---molecular function regulator+++catalytic activity+++antioxidant activity+++binding+++[Biological Process]---metabolic process+++regulation of biological process+++cellular process+++biological regulation+++cellular component organization or biogenesis+++response to stimulus+++positive regulat…
NM_001024509.3	PSME1	mRNA	[Cellular Component]---GO:0000502///proteasome complex+++GO:0005654///nucleoplasm+++GO:0005737///cytoplasm+++GO:0008537///proteasome activator complex+++[Molecular Function]---GO:0061133///endopeptidase activator activity+++[Biological Process]---GO:0010950///positive regulation of endopeptidase activity+++GO:0019884///antigen processing and presentation of exogenous antigen+++GO:0061136///regula…	cellular_component+++molecular_function+++biological_process	[Cellular Component]---cell part+++protein-containing complex+++cell+++membrane-enclosed lumen+++organelle+++organelle part+++[Molecular Function]---molecular function regulator+++[Biological Process]---metabolic process+++regulation of biological process+++cellular process+++positive regulation of biological process+++biological regulation+++immune system process
NM_001024519.1	SLC46A2	mRNA	[Cellular Component]---GO:0009986///cell surface+++GO:0016020///membrane+++GO:0016021///integral component of membrane+++[Molecular Function]---GO:0022857///transmembrane transporter activity+++[Biological Process]---GO:0043029///T cell homeostasis+++GO:0045580///regulation of T cell differentiation+++GO:0048538///thymus development+++GO:0055085///transmembrane transport+++GO:0070233///negative r…	cellular_component+++molecular_function+++biological_process	[Cellular Component]---cell part+++cell+++membrane+++membrane part+++[Molecular Function]---transporter activity+++[Biological Process]---immune system process+++biological regulation+++developmental process+++regulation of biological process+++multicellular organismal process+++cellular process+++localization+++negative regulation of biological process+++signaling+++response to stimulus+++positi…
NM_001024530.3	SIDT2	mRNA	[Cellular Component]---GO:0005764///lysosome+++GO:0005765///lysosomal membrane+++GO:0005886///plasma membrane+++GO:0016020///membrane+++GO:0016021///integral component of membrane+++[Molecular Function]---GO:0003725///double-stranded RNA binding+++GO:0035612///AP-2 adaptor complex binding+++GO:0035650///AP-1 adaptor complex binding+++GO:0051032///nucleic acid transmembrane transporter activity+++…	cellular_component+++molecular_function+++biological_process	[Cellular Component]---organelle+++cell part+++cell+++membrane+++organelle part+++membrane part+++[Molecular Function]---binding+++transporter activity+++[Biological Process]---developmental process+++cellular process+++cellular component organization or biogenesis+++multicellular organismal process+++metabolic process+++response to stimulus+++localization+++biological regulation+++cell prolifera…
NM_001024531.3	RNF114	mRNA	[Cellular Component]---GO:0005634///nucleus+++GO:0005737///cytoplasm+++GO:0005829///cytosol+++GO:0005886///plasma membrane+++[Molecular Function]---GO:0016740///transferase activity+++GO:0046872///metal ion binding+++GO:0061630///ubiquitin protein ligase activity+++[Biological Process]---GO:0000209///protein polyubiquitination+++GO:0006511///ubiquitin-dependent protein catabolic process+++GO:0007…	cellular_component+++molecular_function+++biological_process	[Cellular Component]---organelle+++cell part+++cell+++membrane+++[Molecular Function]---catalytic activity+++binding+++[Biological Process]---metabolic process+++cellular process+++developmental process+++multicellular organismal process+++reproduction+++reproductive process+++multi-organism process
NM_001024533.2	SLA	mRNA	[Cellular Component]---GO:0031234///extrinsic component of cytoplasmic side of plasma membrane+++[Molecular Function]---GO:0004715///non-membrane spanning protein tyrosine kinase activity+++GO:0005070///SH3/SH2 adaptor activity+++GO:0005102///signaling receptor binding+++[Biological Process]---GO:0007169///transmembrane receptor protein tyrosine kinase signaling pathway+++GO:0009966///regulation …	cellular_component+++molecular_function+++biological_process	[Cellular Component]---membrane+++cell part+++membrane part+++cell+++[Molecular Function]---catalytic activity+++binding+++[Biological Process]---regulation of biological process+++response to stimulus+++signaling+++cellular process+++biological regulation+++developmental process+++metabolic process+++cell proliferation
NM_001024535.1	DELE1	mRNA	[Cellular Component]---GO:0005739///mitochondrion+++[Biological Process]---GO:0008625///extrinsic apoptotic signaling pathway via death domain receptors+++GO:0043281///regulation of cysteine-type endopeptidase activity involved in apoptotic process	cellular_component+++biological_process	[Cellular Component]---organelle+++cell part+++cell+++[Biological Process]---regulation of biological process+++response to stimulus+++signaling+++cellular process+++biological regulation+++metabolic process
NM_001024540.1	RAB13	mRNA	[Cellular Component]---GO:0005768///endosome+++GO:0005794///Golgi apparatus+++GO:0005802///trans-Golgi network+++GO:0005886///plasma membrane+++GO:0005911///cell-cell junction+++GO:0005923///bicellular tight junction+++GO:0008021///synaptic vesicle+++GO:0012505///endomembrane system+++GO:0016020///membrane+++GO:0016328///lateral plasma membrane+++GO:0030027///lamellipodium+++GO:0030054///cell jun…	cellular_component+++molecular_function+++biological_process	[Cellular Component]---organelle+++cell part+++cell+++organelle part+++membrane+++cell junction+++synapse+++synapse part+++membrane part+++[Molecular Function]---binding+++catalytic activity+++[Biological Process]---localization+++cellular process+++regulation of biological process+++response to stimulus+++signaling+++biological regulation+++cellular component organization or biogenesis+++develop…
NM_001024541.2	RPS15	mRNA	[Cellular Component]---GO:0005840///ribosome+++GO:0015935///small ribosomal subunit+++GO:0022627///cytosolic small ribosomal subunit+++[Molecular Function]---GO:0003723///RNA binding+++GO:0003735///structural constituent of ribosome+++[Biological Process]---GO:0000028///ribosomal small subunit assembly+++GO:0006412///translation	cellular_component+++molecular_function+++biological_process	[Cellular Component]---organelle+++cell part+++protein-containing complex+++cell+++organelle part+++[Molecular Function]---binding+++structural molecule activity+++[Biological Process]---cellular process+++cellular component organization or biogenesis+++metabolic process
NM_001024543.2	DOK1	mRNA	[Cellular Component]---GO:0005634///nucleus+++GO:0005737///cytoplasm+++GO:0005829///cytosol+++[Biological Process]---GO:0007169///transmembrane receptor protein tyrosine kinase signaling pathway+++GO:0007265///Ras protein signal transduction+++GO:0035556///intracellular signal transduction+++GO:0038145///macrophage colony-stimulating factor signaling pathway	cellular_component+++biological_process	[Cellular Component]---organelle+++cell part+++cell+++[Biological Process]---regulation of biological process+++response to stimulus+++signaling+++cellular process+++biological regulation
NM_001024546.2	LPCAT3	mRNA	[Cellular Component]---GO:0005783///endoplasmic reticulum+++GO:0005789///endoplasmic reticulum membrane+++GO:0016020///membrane+++GO:0016021///integral component of membrane+++[Molecular Function]---GO:0016740///transferase activity+++GO:0016746///transferase activity, transferring acyl groups+++GO:0047184///1-acylglycerophosphocholine O-acyltransferase activity+++GO:0071617///lysophospholipid ac…	cellular_component+++molecular_function+++biological_process	[Cellular Component]---organelle+++cell part+++cell+++membrane+++membrane part+++organelle part+++[Molecular Function]---catalytic activity+++[Biological Process]---metabolic process+++cellular process+++regulation of biological process+++biological regulation
NM_001024548.1	ACSBG1	mRNA	[Cellular Component]---GO:0005737///cytoplasm+++GO:0005783///endoplasmic reticulum+++GO:0005886///plasma membrane+++GO:0016020///membrane+++GO:0031410///cytoplasmic vesicle+++GO:0043231///intracellular membrane-bounded organelle+++[Molecular Function]---GO:0000166///nucleotide binding+++GO:0003824///catalytic activity+++GO:0003996///acyl-CoA ligase activity+++GO:0004467///long-chain fatty acid-Co…	cellular_component+++molecular_function+++biological_process	[Cellular Component]---cell part+++cell+++organelle+++membrane+++[Molecular Function]---binding+++catalytic activity+++[Biological Process]---metabolic process+++cellular process+++response to stimulus
NM_001024549.2	RASSF8	mRNA	[Biological Process]---GO:0007165///signal transduction+++GO:0034334///adherens junction maintenance	biological_process	[Biological Process]---regulation of biological process+++response to stimulus+++signaling+++cellular process+++biological regulation+++cellular component organization or biogenesis
NM_001024556.2	VNN1	mRNA	[Cellular Component]---GO:0005886///plasma membrane+++GO:0016020///membrane+++GO:0031225///anchored component of membrane+++[Molecular Function]---GO:0016787///hydrolase activity+++GO:0016811///hydrolase activity, acting on carbon-nitrogen (but not peptide) bonds, in linear amides+++GO:0017159///pantetheine hydrolase activity+++[Biological Process]---GO:0002526///acute inflammatory response+++GO:…	cellular_component+++molecular_function+++biological_process	[Cellular Component]---membrane+++cell part+++cell+++membrane part+++[Molecular Function]---catalytic activity+++[Biological Process]---response to stimulus+++metabolic process+++cellular process+++developmental process+++biological adhesion+++regulation of biological process+++immune system process+++positive regulation of biological process+++multicellular organismal process+++biological regula…
NM_001024558.1	PRKAB1	mRNA	[Cellular Component]---GO:0005634///nucleus+++GO:0005737///cytoplasm+++GO:0031588///nucleotide-activated protein kinase complex+++[Molecular Function]---GO:0004672///protein kinase activity+++GO:0004679///AMP-activated protein kinase activity+++GO:0016301///kinase activity+++GO:0019901///protein kinase binding+++[Biological Process]---GO:0006468///protein phosphorylation+++GO:0006629///lipid meta…	cellular_component+++molecular_function+++biological_process	[Cellular Component]---organelle+++cell part+++cell+++protein-containing complex+++[Molecular Function]---catalytic activity+++molecular transducer activity+++binding+++[Biological Process]---metabolic process+++cellular process+++regulation of biological process+++positive regulation of biological process+++biological regulation+++developmental process+++multicellular organismal process
NM_001024563.1	KCNB2	mRNA	[Cellular Component]---GO:0005886///plasma membrane+++GO:0008076///voltage-gated potassium channel complex+++GO:0016020///membrane+++GO:0016021///integral component of membrane+++GO:0030425///dendrite+++GO:0032809///neuronal cell body membrane+++GO:0042995///cell projection+++GO:0043025///neuronal cell body+++GO:0043204///perikaryon+++[Molecular Function]---GO:0005216///ion channel activity+++GO:…	cellular_component+++molecular_function+++biological_process	[Cellular Component]---membrane+++cell part+++cell+++membrane part+++protein-containing complex+++[Molecular Function]---transporter activity+++binding+++[Biological Process]---localization+++regulation of biological process+++biological regulation+++cellular process+++cellular component organization or biogenesis
NM_001024565.2	HEYL	mRNA	[Cellular Component]---GO:0005634///nucleus+++GO:0005737///cytoplasm+++[Molecular Function]---GO:0000977///RNA polymerase II regulatory region sequence-specific DNA binding+++GO:0000978///RNA polymerase II proximal promoter sequence-specific DNA binding+++GO:0000981///DNA-binding transcription factor activity, RNA polymerase II-specific+++GO:0001227///DNA-binding transcription repressor activity,…	cellular_component+++molecular_function+++biological_process	[Cellular Component]---organelle+++cell part+++cell+++[Molecular Function]---binding+++transcription regulator activity+++[Biological Process]---metabolic process+++regulation of biological process+++negative regulation of biological process+++cellular process+++biological regulation+++developmental process+++multicellular organismal process+++response to stimulus+++signaling+++positive regulatio…
NM_001024571.2	KANSL2	mRNA	[Cellular Component]---GO:0000123///histone acetyltransferase complex+++GO:0005634///nucleus+++GO:0005654///nucleoplasm+++GO:0005829///cytosol+++GO:0005886///plasma membrane+++GO:0015629///actin cytoskeleton+++GO:0044545///NSL complex+++[Molecular Function]---GO:0043995///histone acetyltransferase activity (H4-K5 specific)+++GO:0043996///histone acetyltransferase activity (H4-K8 specific)+++GO:00…	cellular_component+++molecular_function+++biological_process	[Cellular Component]---membrane-enclosed lumen+++organelle+++cell part+++protein-containing complex+++cell+++organelle part+++membrane+++[Molecular Function]---catalytic activity+++[Biological Process]---cellular process+++cellular component organization or biogenesis+++metabolic process
NM_001024573.1	PLPP6	mRNA	[Cellular Component]---GO:0016020///membrane+++GO:0016021///integral component of membrane+++[Molecular Function]---GO:0016787///hydrolase activity+++GO:0042577///lipid phosphatase activity+++[Biological Process]---GO:0046839///phospholipid dephosphorylation	cellular_component+++molecular_function+++biological_process	[Cellular Component]---membrane+++membrane part+++[Molecular Function]---catalytic activity+++[Biological Process]---metabolic process+++cellular process
NM_001024574.1	NFIC	mRNA	[Cellular Component]---GO:0001650///fibrillar center+++GO:0005634///nucleus+++GO:0005654///nucleoplasm+++[Molecular Function]---GO:0000978///RNA polymerase II proximal promoter sequence-specific DNA binding+++GO:0000981///DNA-binding transcription factor activity, RNA polymerase II-specific+++GO:0001228///DNA-binding transcription activator activity, RNA polymerase II-specific+++GO:0003677///DNA …	cellular_component+++molecular_function+++biological_process	[Cellular Component]---membrane-enclosed lumen+++organelle+++cell part+++cell+++organelle part+++[Molecular Function]---binding+++transcription regulator activity+++[Biological Process]---metabolic process+++regulation of biological process+++negative regulation of biological process+++cellular process+++biological regulation+++developmental process+++multicellular organismal process+++positive r…
NM_001024693.1	ABCA1	mRNA	[Cellular Component]---GO:0005768///endosome+++GO:0005794///Golgi apparatus+++GO:0005886///plasma membrane+++GO:0005887///integral component of plasma membrane+++GO:0009897///external side of plasma membrane+++GO:0016020///membrane+++GO:0016021///integral component of membrane+++GO:0030139///endocytic vesicle+++GO:0043231///intracellular membrane-bounded organelle+++GO:0045121///membrane raft+++G…	cellular_component+++molecular_function+++biological_process	[Cellular Component]---organelle+++cell part+++cell+++membrane+++membrane part+++[Molecular Function]---binding+++transporter activity+++catalytic activity+++molecular transducer activity+++cargo receptor activity+++[Biological Process]---localization+++metabolic process+++cellular process+++cellular component organization or biogenesis+++regulation of biological process+++response to stimulus+++…
NM_001024824.1	DSTYK	mRNA	[Cellular Component]---GO:0005737///cytoplasm+++GO:0005886///plasma membrane+++GO:0016020///membrane+++GO:0016323///basolateral plasma membrane+++GO:0016324///apical plasma membrane+++GO:0030054///cell junction+++[Molecular Function]---GO:0000166///nucleotide binding+++GO:0004672///protein kinase activity+++GO:0004674///protein serine/threonine kinase activity+++GO:0004712///protein serine/threon…	cellular_component+++molecular_function+++biological_process	[Cellular Component]---cell part+++cell+++membrane+++membrane part+++cell junction+++[Molecular Function]---binding+++catalytic activity+++[Biological Process]---metabolic process+++cellular process+++regulation of biological process+++positive regulation of biological process+++biological regulation+++negative regulation of biological process+++response to stimulus+++signaling
NM_001025316.2	RPS28	mRNA	[Cellular Component]---GO:0005737///cytoplasm+++GO:0005783///endoplasmic reticulum+++GO:0005791///rough endoplasmic reticulum+++GO:0005829///cytosol+++GO:0005840///ribosome+++GO:0022627///cytosolic small ribosomal subunit+++GO:0042788///polysomal ribosome+++GO:0098556///cytoplasmic side of rough endoplasmic reticulum membrane+++[Molecular Function]---GO:0003735///structural constituent of ribosom…	cellular_component+++molecular_function+++biological_process	[Cellular Component]---cell part+++cell+++organelle+++protein-containing complex+++organelle part+++membrane+++membrane part+++[Molecular Function]---structural molecule activity+++[Biological Process]---cellular process+++cellular component organization or biogenesis+++metabolic process
NM_001025317.1	RPS8	mRNA	[Cellular Component]---GO:0005737///cytoplasm+++GO:0005783///endoplasmic reticulum+++GO:0005829///cytosol+++GO:0005840///ribosome+++GO:0016020///membrane+++GO:0022627///cytosolic small ribosomal subunit+++GO:1990904///ribonucleoprotein complex+++[Molecular Function]---GO:0003735///structural constituent of ribosome+++[Biological Process]---GO:0000462///maturation of SSU-rRNA from tricistronic rRN…	cellular_component+++molecular_function+++biological_process	[Cellular Component]---cell part+++cell+++organelle+++protein-containing complex+++membrane+++organelle part+++[Molecular Function]---structural molecule activity+++[Biological Process]---metabolic process+++cellular process+++cellular component organization or biogenesis
NM_001025319.2	CYP51A1	mRNA	[Cellular Component]---GO:0005783///endoplasmic reticulum+++GO:0005789///endoplasmic reticulum membrane+++GO:0005886///plasma membrane+++GO:0016020///membrane+++GO:0016021///integral component of membrane+++GO:0031090///organelle membrane+++GO:0043231///intracellular membrane-bounded organelle+++[Molecular Function]---GO:0004497///monooxygenase activity+++GO:0005506///iron ion binding+++GO:000839…	cellular_component+++molecular_function+++biological_process	[Cellular Component]---organelle+++cell part+++cell+++membrane+++membrane part+++organelle part+++[Molecular Function]---catalytic activity+++binding+++[Biological Process]---metabolic process+++regulation of biological process+++negative regulation of biological process+++biological regulation+++localization+++cellular process+++multicellular organismal process
NM_001025320.2	TWF1	mRNA	[Cellular Component]---GO:0005623///cell+++GO:0005737///cytoplasm+++GO:0005856///cytoskeleton+++GO:0005884///actin filament+++GO:0005911///cell-cell junction+++GO:0015629///actin cytoskeleton+++GO:0030016///myofibril+++GO:0030175///filopodium+++GO:0032587///ruffle membrane+++GO:0048471///perinuclear region of cytoplasm+++[Molecular Function]---GO:0003779///actin binding+++GO:0003785///actin monom…	cellular_component+++molecular_function+++biological_process	[Cellular Component]---cell+++cell part+++organelle+++supramolecular complex+++organelle part+++cell junction+++membrane+++membrane part+++[Molecular Function]---binding+++catalytic activity+++[Biological Process]---regulation of biological process+++cellular process+++cellular component organization or biogenesis+++biological regulation+++response to stimulus+++positive regulation of biological …
NM_001025322.2	EIF3H	mRNA	[Cellular Component]---GO:0005737///cytoplasm+++GO:0005829///cytosol+++GO:0005852///eukaryotic translation initiation factor 3 complex+++GO:0016282///eukaryotic 43S preinitiation complex+++GO:0033290///eukaryotic 48S preinitiation complex+++GO:0042788///polysomal ribosome+++GO:0071541///eukaryotic translation initiation factor 3 complex, eIF3m+++[Molecular Function]---GO:0003743///translation ini…	cellular_component+++molecular_function+++biological_process	[Cellular Component]---cell part+++cell+++protein-containing complex+++organelle+++[Molecular Function]---binding+++catalytic activity+++[Biological Process]---metabolic process+++cellular process+++cellular component organization or biogenesis
NM_001025324.2	PLA2G2A	mRNA	[Cellular Component]---GO:0005576///extracellular region+++GO:0005886///plasma membrane+++[Molecular Function]---GO:0004623///phospholipase A2 activity+++GO:0005509///calcium ion binding+++GO:0005543///phospholipid binding+++GO:0047498///calcium-dependent phospholipase A2 activity+++GO:0102567///phospholipase A2 activity (consuming 1,2-dipalmitoylphosphatidylcholine)+++GO:0102568///phospholipase …	cellular_component+++molecular_function+++biological_process	[Cellular Component]---extracellular region+++membrane+++cell part+++cell+++[Molecular Function]---catalytic activity+++binding+++[Biological Process]---metabolic process+++cellular process+++biological adhesion+++regulation of biological process+++immune system process+++cell proliferation+++negative regulation of biological process+++biological regulation+++localization
NM_001025328.2	HPCA	mRNA	[Cellular Component]---GO:0005737///cytoplasm+++GO:0005829///cytosol+++GO:0016020///membrane+++GO:0019898///extrinsic component of membrane+++[Molecular Function]---GO:0003779///actin binding+++GO:0005509///calcium ion binding+++GO:0042802///identical protein binding+++GO:0046872///metal ion binding+++[Biological Process]---GO:0048839///inner ear development+++GO:0071277///cellular response to ca…	cellular_component+++molecular_function+++biological_process	[Cellular Component]---cell part+++cell+++membrane+++membrane part+++[Molecular Function]---binding+++[Biological Process]---developmental process+++multicellular organismal process+++response to stimulus+++cellular process+++regulation of biological process+++localization+++biological regulation
NM_001025330.2	MBTPS1	mRNA	[Cellular Component]---GO:0005794///Golgi apparatus+++GO:0005795///Golgi stack+++GO:0016020///membrane+++GO:0016021///integral component of membrane+++[Molecular Function]---GO:0004175///endopeptidase activity+++GO:0004252///serine-type endopeptidase activity+++[Biological Process]---GO:0006508///proteolysis+++GO:0006606///protein import into nucleus+++GO:0006629///lipid metabolic process+++GO:00…	cellular_component+++molecular_function+++biological_process	[Cellular Component]---organelle+++cell part+++cell+++organelle part+++membrane+++membrane part+++[Molecular Function]---catalytic activity+++[Biological Process]---metabolic process+++localization+++cellular process+++cellular component organization or biogenesis+++regulation of biological process+++biological regulation
NM_001025331.1	CLCN7	mRNA	[Cellular Component]---GO:0005654///nucleoplasm+++GO:0005764///lysosome+++GO:0005765///lysosomal membrane+++GO:0016020///membrane+++GO:0016021///integral component of membrane+++GO:0043231///intracellular membrane-bounded organelle+++[Molecular Function]---GO:0000166///nucleotide binding+++GO:0005247///voltage-gated chloride channel activity+++GO:0005524///ATP binding+++GO:0015108///chloride tran…	cellular_component+++molecular_function+++biological_process	[Cellular Component]---membrane-enclosed lumen+++organelle+++cell part+++cell+++organelle part+++membrane+++membrane part+++[Molecular Function]---binding+++transporter activity+++[Biological Process]---localization
NM_001025333.2	SLC51A	mRNA	[Cellular Component]---GO:0005783///endoplasmic reticulum+++GO:0005789///endoplasmic reticulum membrane+++GO:0005886///plasma membrane+++GO:0016020///membrane+++GO:0016021///integral component of membrane+++GO:0016323///basolateral plasma membrane+++GO:0032991///protein-containing complex+++[Molecular Function]---GO:0015125///bile acid transmembrane transporter activity+++GO:0022857///transmembra…	cellular_component+++molecular_function+++biological_process	[Cellular Component]---organelle+++cell part+++cell+++membrane+++membrane part+++organelle part+++protein-containing complex+++[Molecular Function]---transporter activity+++binding+++[Biological Process]---localization
NM_001025336.2	KCNAB1	mRNA	[Cellular Component]---GO:0005737///cytoplasm+++GO:0005829///cytosol+++GO:0005886///plasma membrane+++GO:0008076///voltage-gated potassium channel complex+++GO:0016020///membrane+++GO:0016021///integral component of membrane+++GO:0031234///extrinsic component of cytoplasmic side of plasma membrane+++GO:0034705///potassium channel complex+++GO:0044224///juxtaparanode region of axon+++[Molecular Fu…	cellular_component+++molecular_function+++biological_process	[Cellular Component]---cell part+++cell+++membrane+++membrane part+++protein-containing complex+++[Molecular Function]---catalytic activity+++transporter activity+++molecular function regulator+++binding+++[Biological Process]---localization+++behavior+++multicellular organismal process+++regulation of biological process+++biological regulation+++metabolic process+++cellular process+++negative re…
NM_001025337.2	GMNN	mRNA	[Cellular Component]---GO:0005634///nucleus+++GO:0005654///nucleoplasm+++GO:0005737///cytoplasm+++GO:0005829///cytosol+++[Molecular Function]---GO:0003682///chromatin binding+++GO:0003714///transcription corepressor activity+++GO:0042826///histone deacetylase binding+++GO:0070491///repressing transcription factor binding+++[Biological Process]---GO:0006275///regulation of DNA replication+++GO:000…	cellular_component+++molecular_function+++biological_process	[Cellular Component]---organelle+++cell part+++cell+++membrane-enclosed lumen+++organelle part+++[Molecular Function]---binding+++transcription regulator activity+++[Biological Process]---metabolic process+++regulation of biological process+++cellular process+++biological regulation+++negative regulation of biological process+++developmental process+++multicellular organismal process+++cellular c…
NM_001025343.1	RBP1	mRNA	[Cellular Component]---GO:0005737///cytoplasm+++GO:0005811///lipid droplet+++GO:0005829///cytosol+++[Molecular Function]---GO:0008289///lipid binding+++GO:0016918///retinal binding+++GO:0019841///retinol binding+++GO:1904768///all-trans-retinol binding+++[Biological Process]---GO:0002138///retinoic acid biosynthetic process+++GO:0006776///vitamin A metabolic process+++GO:0042572///retinol metabol…	cellular_component+++molecular_function+++biological_process	[Cellular Component]---cell part+++cell+++organelle+++[Molecular Function]---binding+++[Biological Process]---metabolic process+++cellular process+++biological regulation
NM_001025346.1	DAPL1	mRNA	[Molecular Function]---GO:0070513///death domain binding+++[Biological Process]---GO:0006915///apoptotic process+++GO:0010507///negative regulation of autophagy+++GO:0030154///cell differentiation+++GO:0034198///cellular response to amino acid starvation+++GO:0097190///apoptotic signaling pathway	molecular_function+++biological_process	[Molecular Function]---binding+++[Biological Process]---cellular process+++metabolic process+++regulation of biological process+++negative regulation of biological process+++biological regulation+++developmental process+++response to stimulus+++signaling
NM_001025348.1	SPINK1	mRNA	[Cellular Component]---GO:0005576///extracellular region+++GO:0005615///extracellular space+++[Molecular Function]---GO:0004867///serine-type endopeptidase inhibitor activity+++GO:0030414///peptidase inhibitor activity+++[Biological Process]---GO:0010466///negative regulation of peptidase activity+++GO:0010751///negative regulation of nitric oxide mediated signal transduction+++GO:0048240///sperm…	cellular_component+++molecular_function+++biological_process	[Cellular Component]---extracellular region+++extracellular region part+++[Molecular Function]---molecular function regulator+++[Biological Process]---metabolic process+++regulation of biological process+++negative regulation of biological process+++cellular process+++biological regulation+++response to stimulus+++signaling+++developmental process+++reproduction+++reproductive process+++multicell…
NM_001025350.3	SF3B5	mRNA	[Cellular Component]---GO:0005634///nucleus+++GO:0005654///nucleoplasm+++GO:0005681///spliceosomal complex+++GO:0005686///U2 snRNP+++GO:0005689///U12-type spliceosomal complex+++GO:0071005///U2-type precatalytic spliceosome+++GO:0071011///precatalytic spliceosome+++[Molecular Function]---GO:0003723///RNA binding+++GO:1990935///splicing factor binding+++[Biological Process]---GO:0000398///mRNA spl…	cellular_component+++molecular_function+++biological_process	[Cellular Component]---organelle+++cell part+++cell+++membrane-enclosed lumen+++organelle part+++protein-containing complex+++[Molecular Function]---binding+++[Biological Process]---metabolic process+++cellular process
NM_001030298.1	MTR	mRNA	[Cellular Component]---GO:0005737///cytoplasm+++GO:0005829///cytosol+++[Molecular Function]---GO:0008168///methyltransferase activity+++GO:0008270///zinc ion binding+++GO:0008705///methionine synthase activity+++GO:0016740///transferase activity+++GO:0031419///cobalamin binding+++GO:0046872///metal ion binding+++[Biological Process]---GO:0008652///cellular amino acid biosynthetic process+++GO:000…	cellular_component+++molecular_function+++biological_process	[Cellular Component]---cell part+++cell+++[Molecular Function]---catalytic activity+++binding+++[Biological Process]---metabolic process+++cellular process
NM_001030299.1	MTRR	mRNA	[Cellular Component]---GO:0005737///cytoplasm+++GO:0005829///cytosol+++[Molecular Function]---GO:0003958///NADPH-hemoprotein reductase activity+++GO:0010181///FMN binding+++GO:0016491///oxidoreductase activity+++GO:0016709///oxidoreductase activity, acting on paired donors, with incorporation or reduction of molecular oxygen, NAD(P)H as one donor, and incorporation of one atom of oxygen+++GO:0016…	cellular_component+++molecular_function+++biological_process	[Cellular Component]---cell part+++cell+++[Molecular Function]---catalytic activity+++binding+++[Biological Process]---metabolic process+++cellular process+++biological regulation
NM_001030302.2	PRKAG3	mRNA	[Cellular Component]---GO:0005634///nucleus+++GO:0005737///cytoplasm+++GO:0031588///nucleotide-activated protein kinase complex+++[Molecular Function]---GO:0000166///nucleotide binding+++GO:0004679///AMP-activated protein kinase activity+++GO:0005524///ATP binding+++GO:0016208///AMP binding+++GO:0016301///kinase activity+++GO:0019887///protein kinase regulator activity+++GO:0019901///protein kina…	cellular_component+++molecular_function+++biological_process	[Cellular Component]---organelle+++cell part+++cell+++protein-containing complex+++[Molecular Function]---binding+++molecular transducer activity+++catalytic activity+++molecular function regulator+++[Biological Process]---metabolic process+++cellular process+++regulation of biological process+++response to stimulus+++multicellular organismal process+++biological regulation
NM_001031750.1	FOXL2	mRNA	[Cellular Component]---GO:0005634///nucleus+++GO:0005654///nucleoplasm+++GO:0045171///intercellular bridge+++[Molecular Function]---GO:0000978///RNA polymerase II proximal promoter sequence-specific DNA binding+++GO:0000981///DNA-binding transcription factor activity, RNA polymerase II-specific+++GO:0001228///DNA-binding transcription activator activity, RNA polymerase II-specific+++GO:0003677///…	cellular_component+++molecular_function+++biological_process	[Cellular Component]---organelle+++cell part+++cell+++membrane-enclosed lumen+++organelle part+++extracellular region part+++extracellular region+++[Molecular Function]---binding+++transcription regulator activity+++molecular function regulator+++[Biological Process]---metabolic process+++regulation of biological process+++negative regulation of biological process+++cellular process+++biological …
NM_001031758.1	EDC3	mRNA	[Cellular Component]---GO:0000932///P-body+++GO:0036464///cytoplasmic ribonucleoprotein granule+++[Molecular Function]---GO:0003729///mRNA binding+++GO:0042802///identical protein binding+++GO:1990174///phosphodiesterase decapping endonuclease activity+++[Biological Process]---GO:0031087///deadenylation-independent decapping of nuclear-transcribed mRNA+++GO:0033962///cytoplasmic mRNA processing b…	cellular_component+++molecular_function+++biological_process	[Cellular Component]---organelle+++cell part+++protein-containing complex+++cell+++[Molecular Function]---binding+++catalytic activity+++[Biological Process]---metabolic process+++regulation of biological process+++negative regulation of biological process+++cellular process+++biological regulation+++cellular component organization or biogenesis
NM_001031759.2	HEPACAM	mRNA	[Cellular Component]---GO:0005737///cytoplasm+++GO:0005911///cell-cell junction+++GO:0016020///membrane+++GO:0016021///integral component of membrane+++GO:0030424///axon+++[Biological Process]---GO:0007049///cell cycle+++GO:0007050///cell cycle arrest+++GO:0007155///cell adhesion+++GO:0034613///cellular protein localization+++GO:0040008///regulation of growth	cellular_component+++biological_process	[Cellular Component]---cell part+++cell+++cell junction+++membrane+++membrane part+++[Biological Process]---cellular process+++regulation of biological process+++negative regulation of biological process+++biological regulation+++biological adhesion+++localization+++growth
NM_001031760.1	SLC38A11	mRNA	[Cellular Component]---GO:0016020///membrane+++GO:0016021///integral component of membrane+++[Molecular Function]---GO:0015171///amino acid transmembrane transporter activity+++[Biological Process]---GO:0003333///amino acid transmembrane transport+++GO:0006811///ion transport+++GO:0006814///sodium ion transport+++GO:0006865///amino acid transport	cellular_component+++molecular_function+++biological_process	[Cellular Component]---membrane+++membrane part+++[Molecular Function]---transporter activity+++[Biological Process]---localization
NM_001031763.1	SLC25A35	mRNA	[Cellular Component]---GO:0005739///mitochondrion+++GO:0005743///mitochondrial inner membrane+++GO:0016020///membrane+++GO:0016021///integral component of membrane	cellular_component	[Cellular Component]---organelle+++cell part+++cell+++membrane+++organelle part+++membrane part
NM_001031767.2	DRAM1	mRNA	[Cellular Component]---GO:0005737///cytoplasm+++GO:0005764///lysosome+++GO:0016020///membrane+++GO:0016021///integral component of membrane+++[Biological Process]---GO:0010506///regulation of autophagy	cellular_component+++biological_process	[Cellular Component]---cell part+++cell+++organelle+++membrane+++membrane part+++[Biological Process]---metabolic process+++regulation of biological process+++cellular process+++biological regulation
NM_001031768.2	TMEM229B	mRNA	[Cellular Component]---GO:0016020///membrane+++GO:0016021///integral component of membrane+++[Biological Process]---GO:0009617///response to bacterium	cellular_component+++biological_process	[Cellular Component]---membrane+++membrane part+++[Biological Process]---response to stimulus+++multi-organism process
NM_001032294.1	CARF	mRNA	[Cellular Component]---GO:0005634///nucleus+++[Molecular Function]---GO:0001228///DNA-binding transcription activator activity, RNA polymerase II-specific+++GO:0003677///DNA binding+++GO:0003700///DNA-binding transcription factor activity+++[Biological Process]---GO:0035865///cellular response to potassium ion+++GO:0061400///positive regulation of transcription from RNA polymerase II promoter in …	cellular_component+++molecular_function+++biological_process	[Cellular Component]---organelle+++cell part+++cell+++[Molecular Function]---transcription regulator activity+++binding+++[Biological Process]---response to stimulus+++cellular process+++metabolic process+++regulation of biological process+++positive regulation of biological process+++biological regulation
NM_001032299.1	ST8SIA1	mRNA	[Cellular Component]---GO:0000139///Golgi membrane+++GO:0005794///Golgi apparatus+++GO:0016020///membrane+++GO:0016021///integral component of membrane+++[Molecular Function]---GO:0003828///alpha-N-acetylneuraminate alpha-2,8-sialyltransferase activity+++GO:0008373///sialyltransferase activity+++GO:0016740///transferase activity+++GO:0016757///transferase activity, transferring glycosyl groups+++…	cellular_component+++molecular_function+++biological_process	[Cellular Component]---membrane+++organelle+++cell part+++cell+++organelle part+++membrane part+++[Molecular Function]---catalytic activity+++[Biological Process]---metabolic process+++cellular process+++regulation of biological process+++cell proliferation+++positive regulation of biological process+++biological regulation+++response to stimulus
NM_001033119.2	FOXA3	mRNA	[Cellular Component]---GO:0005623///cell+++GO:0005634///nucleus+++GO:0005654///nucleoplasm+++GO:0015629///actin cytoskeleton+++[Molecular Function]---GO:0000976///transcription regulatory region sequence-specific DNA binding+++GO:0000981///DNA-binding transcription factor activity, RNA polymerase II-specific+++GO:0003677///DNA binding+++GO:0003700///DNA-binding transcription factor activity+++GO:…	cellular_component+++molecular_function+++biological_process	[Cellular Component]---cell+++organelle+++cell part+++membrane-enclosed lumen+++organelle part+++[Molecular Function]---binding+++transcription regulator activity+++[Biological Process]---cellular process+++biological regulation+++metabolic process+++regulation of biological process+++reproduction+++reproductive process+++multicellular organismal process+++multi-organism process+++response to sti…
NM_001033121.1	ZNF148	mRNA	[Cellular Component]---GO:0005634///nucleus+++GO:0005654///nucleoplasm+++GO:0005794///Golgi apparatus+++[Molecular Function]---GO:0000978///RNA polymerase II proximal promoter sequence-specific DNA binding+++GO:0001227///DNA-binding transcription repressor activity, RNA polymerase II-specific+++GO:0003676///nucleic acid binding+++GO:0003677///DNA binding+++GO:0003700///DNA-binding transcription f…	cellular_component+++molecular_function+++biological_process	[Cellular Component]---organelle+++cell part+++cell+++membrane-enclosed lumen+++organelle part+++[Molecular Function]---binding+++transcription regulator activity+++[Biological Process]---metabolic process+++regulation of biological process+++negative regulation of biological process+++cellular process+++biological regulation+++reproduction+++reproductive process+++multicellular organismal proces…
NM_001033616.1	GABARAPL1	mRNA	[Cellular Component]---GO:0000421///autophagosome membrane+++GO:0005737///cytoplasm+++GO:0005739///mitochondrion+++GO:0005776///autophagosome+++GO:0005783///endoplasmic reticulum+++GO:0005794///Golgi apparatus+++GO:0005829///cytosol+++GO:0005856///cytoskeleton+++GO:0005874///microtubule+++GO:0016020///membrane+++GO:0030659///cytoplasmic vesicle membrane+++GO:0031410///cytoplasmic vesicle+++[Molec…	cellular_component+++molecular_function+++biological_process	[Cellular Component]---membrane+++organelle+++cell part+++cell+++organelle part+++supramolecular complex+++[Molecular Function]---binding+++[Biological Process]---metabolic process+++cellular process+++cellular component organization or biogenesis+++response to stimulus
NM_001033617.2	CTSC	mRNA	[Cellular Component]---GO:0005615///extracellular space+++GO:0005654///nucleoplasm+++GO:0005737///cytoplasm+++GO:0005764///lysosome+++GO:0005813///centrosome+++GO:0043231///intracellular membrane-bounded organelle+++[Molecular Function]---GO:0004197///cysteine-type endopeptidase activity+++GO:0004252///serine-type endopeptidase activity+++GO:0008233///peptidase activity+++GO:0008234///cysteine-ty…	cellular_component+++molecular_function+++biological_process	[Cellular Component]---extracellular region part+++extracellular region+++membrane-enclosed lumen+++organelle+++cell part+++cell+++organelle part+++[Molecular Function]---catalytic activity+++molecular function regulator+++[Biological Process]---immune system process+++response to stimulus+++cell killing+++metabolic process+++cellular process+++developmental process+++regulation of biological pro…
NM_001033618.1	ACTG1	mRNA	[Cellular Component]---GO:0005737///cytoplasm+++GO:0005856///cytoskeleton+++GO:0005884///actin filament+++GO:0005886///plasma membrane+++GO:0005911///cell-cell junction+++GO:0005925///focal adhesion+++GO:0043296///apical junction complex+++GO:0070062///extracellular exosome+++GO:0097433///dense body+++GO:0098793///presynapse+++[Molecular Function]---GO:0000166///nucleotide binding+++GO:0005522///…	cellular_component+++molecular_function+++biological_process	[Cellular Component]---cell part+++cell+++organelle+++supramolecular complex+++organelle part+++membrane+++cell junction+++extracellular region part+++extracellular region+++synapse+++synapse part+++[Molecular Function]---binding+++structural molecule activity+++[Biological Process]---developmental process+++multicellular organismal process+++metabolic process+++regulation of biological process++…
NM_001033625.2	SLC27A1	mRNA	[Cellular Component]---GO:0005737///cytoplasm+++GO:0005739///mitochondrion+++GO:0005743///mitochondrial inner membrane+++GO:0005783///endoplasmic reticulum+++GO:0005886///plasma membrane+++GO:0005887///integral component of plasma membrane+++GO:0012505///endomembrane system+++GO:0016020///membrane+++GO:0016021///integral component of membrane+++[Molecular Function]---GO:0000166///nucleotide bindi…	cellular_component+++molecular_function+++biological_process	[Cellular Component]---cell part+++cell+++organelle+++membrane+++organelle part+++membrane part+++[Molecular Function]---binding+++catalytic activity+++transporter activity+++[Biological Process]---localization+++metabolic process+++cellular process+++response to stimulus+++regulation of biological process+++positive regulation of biological process+++biological regulation+++multicellular organis…
NM_001033627.2	BECN1	mRNA	[Cellular Component]---GO:0000407///phagophore assembly site+++GO:0005634///nucleus+++GO:0005737///cytoplasm+++GO:0005739///mitochondrion+++GO:0005768///endosome+++GO:0005776///autophagosome+++GO:0005783///endoplasmic reticulum+++GO:0005789///endoplasmic reticulum membrane+++GO:0005794///Golgi apparatus+++GO:0005829///cytosol+++GO:0010008///endosome membrane+++GO:0016020///membrane+++GO:0019898//…	cellular_component+++molecular_function+++biological_process	[Cellular Component]---cell part+++cell+++organelle+++membrane+++membrane part+++organelle part+++protein-containing complex+++[Molecular Function]---binding+++[Biological Process]---metabolic process+++cellular process+++cellular component organization or biogenesis+++localization+++response to stimulus+++regulation of biological process+++biological regulation+++immune system process+++multi-or…
NM_001033763.1	DNAJB1	mRNA	[Cellular Component]---GO:0005634///nucleus+++GO:0005654///nucleoplasm+++GO:0005730///nucleolus+++GO:0005737///cytoplasm+++GO:0005829///cytosol+++[Molecular Function]---GO:0001671///ATPase activator activity+++GO:0003714///transcription corepressor activity+++GO:0030544///Hsp70 protein binding+++GO:0044183///protein binding involved in protein folding+++GO:0051082///unfolded protein binding+++GO:…	cellular_component+++molecular_function+++biological_process	[Cellular Component]---organelle+++cell part+++cell+++membrane-enclosed lumen+++organelle part+++[Molecular Function]---molecular function regulator+++transcription regulator activity+++binding+++[Biological Process]---cellular process+++biological regulation+++regulation of biological process+++negative regulation of biological process+++cellular component organization or biogenesis+++metabolic …
NM_001033990.3	SCP2	mRNA	[Cellular Component]---GO:0005654///nucleoplasm+++GO:0005737///cytoplasm+++GO:0005739///mitochondrion+++GO:0005777///peroxisome+++GO:0005782///peroxisomal matrix+++GO:0032991///protein-containing complex+++GO:0043231///intracellular membrane-bounded organelle+++[Molecular Function]---GO:0000062///fatty-acyl-CoA binding+++GO:0003824///catalytic activity+++GO:0003988///acetyl-CoA C-acyltransferase …	cellular_component+++molecular_function+++biological_process	[Cellular Component]---membrane-enclosed lumen+++organelle+++cell part+++cell+++organelle part+++protein-containing complex+++[Molecular Function]---binding+++catalytic activity+++transporter activity+++[Biological Process]---metabolic process+++cellular process+++localization+++cellular component organization or biogenesis+++regulation of biological process+++positive regulation of biological pr…
NM_001034036.1	PPARA	mRNA	[Cellular Component]---GO:0005634///nucleus+++GO:0005654///nucleoplasm+++GO:0042025///host cell nucleus+++GO:0090575///RNA polymerase II transcription factor complex+++[Molecular Function]---GO:0000976///transcription regulatory region sequence-specific DNA binding+++GO:0000977///RNA polymerase II regulatory region sequence-specific DNA binding+++GO:0000978///RNA polymerase II proximal promoter s…	cellular_component+++molecular_function+++biological_process	[Cellular Component]---organelle+++cell part+++cell+++membrane-enclosed lumen+++organelle part+++other organism part+++other organism+++protein-containing complex+++[Molecular Function]---binding+++transcription regulator activity+++molecular transducer activity+++[Biological Process]---metabolic process+++regulation of biological process+++negative regulation of biological process+++cellular pro…
NM_001034039.2	COL1A1	mRNA	[Cellular Component]---GO:0005576///extracellular region+++GO:0005581///collagen trimer+++GO:0005584///collagen type I trimer+++GO:0005615///extracellular space+++GO:0005737///cytoplasm+++GO:0031012///extracellular matrix+++[Molecular Function]---GO:0002020///protease binding+++GO:0005201///extracellular matrix structural constituent+++GO:0005515///protein binding+++GO:0042802///identical protein…	cellular_component+++molecular_function+++biological_process	[Cellular Component]---extracellular region+++protein-containing complex+++extracellular region part+++supramolecular complex+++cell part+++cell+++[Molecular Function]---binding+++structural molecule activity+++[Biological Process]---developmental process+++multicellular organismal process+++cellular process+++response to stimulus+++regulation of biological process+++positive regulation of biolog…
NM_001034047.1	RPS3	mRNA	[Cellular Component]---GO:0005634///nucleus+++GO:0005730///nucleolus+++GO:0005737///cytoplasm+++GO:0005739///mitochondrion+++GO:0005743///mitochondrial inner membrane+++GO:0005759///mitochondrial matrix+++GO:0005783///endoplasmic reticulum+++GO:0005819///spindle+++GO:0005829///cytosol+++GO:0005840///ribosome+++GO:0005844///polysome+++GO:0005856///cytoskeleton+++GO:0005886///plasma membrane+++GO:0…	cellular_component+++molecular_function+++biological_process	[Cellular Component]---organelle+++cell part+++cell+++membrane-enclosed lumen+++organelle part+++membrane+++protein-containing complex+++synapse+++synapse part+++membrane part+++[Molecular Function]---binding+++structural molecule activity+++catalytic activity+++[Biological Process]---metabolic process+++response to stimulus+++cellular process+++regulation of biological process+++biological regul…
NM_001034049.1	P2RX4	mRNA	[Cellular Component]---GO:0005623///cell+++GO:0005639///integral component of nuclear inner membrane+++GO:0005886///plasma membrane+++GO:0005887///integral component of plasma membrane+++GO:0016020///membrane+++GO:0016021///integral component of membrane+++GO:0030054///cell junction+++GO:0048471///perinuclear region of cytoplasm+++GO:0098794///postsynapse+++[Molecular Function]---GO:0001614///pur…	cellular_component+++molecular_function+++biological_process	[Cellular Component]---cell+++organelle+++membrane+++cell part+++membrane part+++organelle part+++cell junction+++synapse+++synapse part+++[Molecular Function]---molecular transducer activity+++transporter activity+++binding+++[Biological Process]---localization+++regulation of biological process+++response to stimulus+++signaling+++cellular process+++biological regulation+++multicellular organis…
NM_001034208.2	RIDA	mRNA	[Cellular Component]---GO:0005634///nucleus+++GO:0005737///cytoplasm+++GO:0005739///mitochondrion+++GO:0005759///mitochondrial matrix+++GO:0005777///peroxisome+++GO:0005829///cytosol+++[Molecular Function]---GO:0003723///RNA binding+++GO:0003729///mRNA binding+++GO:0016787///hydrolase activity+++GO:0016892///endoribonuclease activity, producing 3'-phosphomonoesters+++GO:0019239///deaminase activi…	cellular_component+++molecular_function+++biological_process	[Cellular Component]---organelle+++cell part+++cell+++membrane-enclosed lumen+++organelle part+++[Molecular Function]---binding+++catalytic activity+++[Biological Process]---metabolic process+++regulation of biological process+++negative regulation of biological process+++cellular process+++biological regulation+++positive regulation of biological process
NM_001034210.2	PAPSS1	mRNA	[Molecular Function]---GO:0004020///adenylylsulfate kinase activity+++GO:0004781///sulfate adenylyltransferase (ATP) activity+++GO:0005524///ATP binding+++GO:0042803///protein homodimerization activity+++[Biological Process]---GO:0000103///sulfate assimilation+++GO:0016310///phosphorylation+++GO:0050428///3'-phosphoadenosine 5'-phosphosulfate biosynthetic process	molecular_function+++biological_process	[Molecular Function]---catalytic activity+++binding+++[Biological Process]---metabolic process+++cellular process
NM_001034212.2	POLR2C	mRNA	[Cellular Component]---GO:0005634///nucleus+++GO:0005654///nucleoplasm+++GO:0005665///RNA polymerase II, core complex+++GO:0005737///cytoplasm+++GO:0005829///cytosol+++GO:0015630///microtubule cytoskeleton+++[Molecular Function]---GO:0003677///DNA binding+++GO:0003899///DNA-directed 5'-3' RNA polymerase activity+++GO:0046983///protein dimerization activity+++[Biological Process]---GO:0006351///tr…	cellular_component+++molecular_function+++biological_process	[Cellular Component]---organelle+++cell part+++cell+++membrane-enclosed lumen+++organelle part+++protein-containing complex+++[Molecular Function]---binding+++catalytic activity+++[Biological Process]---metabolic process+++cellular process
NM_001034215.2	DIRAS3	mRNA	[Cellular Component]---GO:0005886///plasma membrane+++GO:0016020///membrane+++[Molecular Function]---GO:0000166///nucleotide binding+++GO:0003924///GTPase activity+++GO:0005525///GTP binding+++GO:0019003///GDP binding+++[Biological Process]---GO:0007165///signal transduction	cellular_component+++molecular_function+++biological_process	[Cellular Component]---membrane+++cell part+++cell+++[Molecular Function]---binding+++catalytic activity+++[Biological Process]---regulation of biological process+++response to stimulus+++signaling+++cellular process+++biological regulation
NM_001034217.2	TTC1	mRNA	[Cellular Component]---GO:0005829///cytosol	cellular_component	[Cellular Component]---cell part+++cell
NM_001034218.2	FETUB	mRNA	[Cellular Component]---GO:0005576///extracellular region+++GO:0005615///extracellular space+++[Molecular Function]---GO:0004857///enzyme inhibitor activity+++GO:0004866///endopeptidase inhibitor activity+++GO:0004869///cysteine-type endopeptidase inhibitor activity+++GO:0008191///metalloendopeptidase inhibitor activity+++GO:0030414///peptidase inhibitor activity+++[Biological Process]---GO:000733…	cellular_component+++molecular_function+++biological_process	[Cellular Component]---extracellular region+++extracellular region part+++[Molecular Function]---molecular function regulator+++[Biological Process]---reproduction+++reproductive process+++multi-organism process+++cellular process+++metabolic process+++regulation of biological process+++negative regulation of biological process+++biological regulation
NM_001034222.1	NUP88	mRNA	[Cellular Component]---GO:0005643///nuclear pore+++GO:0005654///nucleoplasm+++[Molecular Function]---GO:0017056///structural constituent of nuclear pore+++[Biological Process]---GO:0000055///ribosomal large subunit export from nucleus+++GO:0000056///ribosomal small subunit export from nucleus+++GO:0006406///mRNA export from nucleus+++GO:0006606///protein import into nucleus+++GO:0006611///protein…	cellular_component+++molecular_function+++biological_process	[Cellular Component]---organelle+++cell part+++protein-containing complex+++cell+++organelle part+++membrane-enclosed lumen+++[Molecular Function]---structural molecule activity+++[Biological Process]---localization+++cellular component organization or biogenesis+++metabolic process
NM_001034223.2	FHL3	mRNA	[Cellular Component]---GO:0001725///stress fiber+++GO:0005634///nucleus+++GO:0005737///cytoplasm+++GO:0030018///Z disc+++[Molecular Function]---GO:0003712///transcription coregulator activity+++GO:0003779///actin binding+++GO:0046872///metal ion binding+++[Biological Process]---GO:0030036///actin cytoskeleton organization+++GO:1903506///regulation of nucleic acid-templated transcription	cellular_component+++molecular_function+++biological_process	[Cellular Component]---organelle+++cell part+++cell+++organelle part+++supramolecular complex+++[Molecular Function]---transcription regulator activity+++binding+++[Biological Process]---cellular process+++cellular component organization or biogenesis+++metabolic process+++regulation of biological process+++biological regulation
NM_001034224.1	CNBP	mRNA	[Cellular Component]---GO:0005634///nucleus+++GO:0005737///cytoplasm+++GO:0005783///endoplasmic reticulum+++GO:0005829///cytosol+++[Molecular Function]---GO:0000977///RNA polymerase II regulatory region sequence-specific DNA binding+++GO:0001227///DNA-binding transcription repressor activity, RNA polymerase II-specific+++GO:0003676///nucleic acid binding+++GO:0003677///DNA binding+++GO:0003727///…	cellular_component+++molecular_function+++biological_process	[Cellular Component]---organelle+++cell part+++cell+++[Molecular Function]---binding+++transcription regulator activity+++translation regulator activity+++[Biological Process]---metabolic process+++regulation of biological process+++negative regulation of biological process+++cellular process+++biological regulation+++cell proliferation+++positive regulation of biological process
NM_001034225.1	OS9	mRNA	[Cellular Component]---GO:0005783///endoplasmic reticulum+++GO:0005788///endoplasmic reticulum lumen+++[Molecular Function]---GO:0005515///protein binding+++GO:0030246///carbohydrate binding+++[Biological Process]---GO:0006511///ubiquitin-dependent protein catabolic process+++GO:0006621///protein retention in ER lumen+++GO:0016567///protein ubiquitination+++GO:0030433///ubiquitin-dependent ERAD p…	cellular_component+++molecular_function+++biological_process	[Cellular Component]---organelle+++cell part+++cell+++membrane-enclosed lumen+++organelle part+++[Molecular Function]---binding+++[Biological Process]---metabolic process+++cellular process+++localization+++biological regulation+++response to stimulus+++regulation of biological process+++negative regulation of biological process
NM_001034228.1	EIF4A1	mRNA	[Cellular Component]---GO:0005737///cytoplasm+++[Molecular Function]---GO:0000166///nucleotide binding+++GO:0003676///nucleic acid binding+++GO:0003723///RNA binding+++GO:0003724///RNA helicase activity+++GO:0003725///double-stranded RNA binding+++GO:0003743///translation initiation factor activity+++GO:0004386///helicase activity+++GO:0005524///ATP binding+++GO:0016787///hydrolase activity+++[Bi…	cellular_component+++molecular_function+++biological_process	[Cellular Component]---cell part+++cell+++[Molecular Function]---binding+++catalytic activity+++[Biological Process]---metabolic process+++cellular process
NM_001034229.1	MOB3A	mRNA	[Molecular Function]---GO:0046872///metal ion binding	molecular_function	[Molecular Function]---binding
NM_001034231.2	ID2	mRNA	[Cellular Component]---GO:0005634///nucleus+++GO:0005737///cytoplasm+++GO:0005829///cytosol+++GO:0032991///protein-containing complex+++[Molecular Function]---GO:0003713///transcription coactivator activity+++GO:0044325///ion channel binding+++GO:0046983///protein dimerization activity+++[Biological Process]---GO:0000122///negative regulation of transcription by RNA polymerase II+++GO:0001656///m…	cellular_component+++molecular_function+++biological_process	[Cellular Component]---organelle+++cell part+++cell+++protein-containing complex+++[Molecular Function]---transcription regulator activity+++binding+++[Biological Process]---metabolic process+++regulation of biological process+++negative regulation of biological process+++cellular process+++biological regulation+++developmental process+++multicellular organismal process+++immune system process+++…
NM_001034234.2	SLC13A2	mRNA	[Cellular Component]---GO:0016020///membrane+++GO:0016021///integral component of membrane+++[Molecular Function]---GO:0022857///transmembrane transporter activity+++[Biological Process]---GO:0055085///transmembrane transport+++GO:0098656///anion transmembrane transport	cellular_component+++molecular_function+++biological_process	[Cellular Component]---membrane+++membrane part+++[Molecular Function]---transporter activity+++[Biological Process]---localization
NM_001034237.2	MED6	mRNA	[Cellular Component]---GO:0005634///nucleus+++GO:0005654///nucleoplasm+++GO:0016020///membrane+++GO:0016021///integral component of membrane+++GO:0016592///mediator complex+++GO:0070847///core mediator complex+++[Molecular Function]---GO:0003677///DNA binding+++GO:0003712///transcription coregulator activity+++[Biological Process]---GO:0006357///regulation of transcription by RNA polymerase II+++…	cellular_component+++molecular_function+++biological_process	[Cellular Component]---organelle+++cell part+++cell+++membrane-enclosed lumen+++organelle part+++membrane+++membrane part+++protein-containing complex+++[Molecular Function]---binding+++transcription regulator activity+++[Biological Process]---metabolic process+++regulation of biological process+++cellular process+++biological regulation+++developmental process+++multicellular organismal process+…
NM_001034238.2	PPP1R7	mRNA	[Cellular Component]---GO:0005634///nucleus+++[Biological Process]---GO:0007059///chromosome segregation	cellular_component+++biological_process	[Cellular Component]---organelle+++cell part+++cell+++[Biological Process]---cellular process
NM_001034247.1	GADD45A	mRNA	[Cellular Component]---GO:0005634///nucleus+++GO:0005737///cytoplasm+++GO:0016607///nuclear speck+++[Molecular Function]---GO:0019900///kinase binding+++GO:0042803///protein homodimerization activity+++GO:0046982///protein heterodimerization activity+++GO:0047485///protein N-terminus binding+++GO:1990841///promoter-specific chromatin binding+++[Biological Process]---GO:0000122///negative regulati…	cellular_component+++molecular_function+++biological_process	[Cellular Component]---organelle+++cell part+++cell+++membrane-enclosed lumen+++organelle part+++[Molecular Function]---binding+++[Biological Process]---metabolic process+++regulation of biological process+++negative regulation of biological process+++cellular process+++biological regulation+++response to stimulus+++signaling+++positive regulation of biological process+++cellular component organi…
NM_001034249.2	ADH5	mRNA	[Cellular Component]---GO:0005737///cytoplasm+++GO:0005739///mitochondrion+++GO:0005829///cytosol+++[Molecular Function]---GO:0004022///alcohol dehydrogenase (NAD) activity+++GO:0004024///alcohol dehydrogenase activity, zinc-dependent+++GO:0005504///fatty acid binding+++GO:0008270///zinc ion binding+++GO:0016491///oxidoreductase activity+++GO:0018467///formaldehyde dehydrogenase activity+++GO:004…	cellular_component+++molecular_function+++biological_process	[Cellular Component]---cell part+++cell+++organelle+++[Molecular Function]---catalytic activity+++binding+++[Biological Process]---metabolic process+++cellular process+++multicellular organismal process+++response to stimulus+++multi-organism process+++biological regulation+++detoxification
NM_001034255.2	CFD	mRNA	[Cellular Component]---GO:0005576///extracellular region+++GO:0005615///extracellular space+++[Molecular Function]---GO:0004252///serine-type endopeptidase activity+++GO:0008233///peptidase activity+++GO:0008236///serine-type peptidase activity+++GO:0016787///hydrolase activity+++[Biological Process]---GO:0002376///immune system process+++GO:0006508///proteolysis+++GO:0006957///complement activat…	cellular_component+++molecular_function+++biological_process	[Cellular Component]---extracellular region+++extracellular region part+++[Molecular Function]---catalytic activity+++[Biological Process]---immune system process+++metabolic process+++regulation of biological process+++response to stimulus+++positive regulation of biological process+++biological regulation+++signaling+++cellular process+++multi-organism process
NM_001034258.2	OCIAD2	mRNA	[Cellular Component]---GO:0005768///endosome+++[Biological Process]---GO:0009617///response to bacterium	cellular_component+++biological_process	[Cellular Component]---organelle+++cell part+++cell+++[Biological Process]---response to stimulus+++multi-organism process
NM_001034259.1	DUSP18	mRNA	[Cellular Component]---GO:0005634///nucleus+++GO:0005654///nucleoplasm+++GO:0005737///cytoplasm+++GO:0005739///mitochondrion+++GO:0005743///mitochondrial inner membrane+++GO:0016020///membrane+++[Molecular Function]---GO:0004721///phosphoprotein phosphatase activity+++GO:0004725///protein tyrosine phosphatase activity+++GO:0008138///protein tyrosine/serine/threonine phosphatase activity+++GO:0016…	cellular_component+++molecular_function+++biological_process	[Cellular Component]---organelle+++cell part+++cell+++membrane-enclosed lumen+++organelle part+++membrane+++[Molecular Function]---catalytic activity+++[Biological Process]---metabolic process+++regulation of biological process+++negative regulation of biological process+++response to stimulus+++signaling+++cellular process+++biological regulation
NM_001034268.1	DNAJB11	mRNA	[Cellular Component]---GO:0005615///extracellular space+++GO:0005634///nucleus+++GO:0005737///cytoplasm+++GO:0005783///endoplasmic reticulum+++GO:0005788///endoplasmic reticulum lumen+++[Molecular Function]---GO:0005102///signaling receptor binding+++GO:0051082///unfolded protein binding+++[Biological Process]---GO:0006457///protein folding+++GO:0016556///mRNA modification+++GO:0050768///negative…	cellular_component+++molecular_function+++biological_process	[Cellular Component]---extracellular region part+++extracellular region+++organelle+++cell part+++cell+++membrane-enclosed lumen+++organelle part+++[Molecular Function]---binding+++[Biological Process]---cellular process+++metabolic process+++developmental process+++regulation of biological process+++negative regulation of biological process+++multicellular organismal process+++biological regulat…
NM_001034270.1	TSPAN1	mRNA	[Cellular Component]---GO:0005654///nucleoplasm+++GO:0005737///cytoplasm+++GO:0005764///lysosome+++GO:0005765///lysosomal membrane+++GO:0005886///plasma membrane+++GO:0005887///integral component of plasma membrane+++GO:0016020///membrane+++GO:0016021///integral component of membrane+++GO:0030054///cell junction+++GO:0031982///vesicle+++GO:0043231///intracellular membrane-bounded organelle+++GO:0…	cellular_component+++biological_process	[Cellular Component]---membrane-enclosed lumen+++organelle+++cell part+++cell+++organelle part+++membrane+++membrane part+++cell junction+++[Biological Process]---biological regulation
NM_001034273.2	GTSF1	mRNA	[Cellular Component]---GO:0005737///cytoplasm+++[Molecular Function]---GO:0046872///metal ion binding+++[Biological Process]---GO:0007283///spermatogenesis+++GO:0030154///cell differentiation	cellular_component+++molecular_function+++biological_process	[Cellular Component]---cell part+++cell+++[Molecular Function]---binding+++[Biological Process]---reproduction+++reproductive process+++multicellular organismal process+++multi-organism process+++developmental process+++cellular process
NM_001034274.2	MRPL17	mRNA	[Cellular Component]---GO:0005739///mitochondrion+++GO:0005743///mitochondrial inner membrane+++GO:0005762///mitochondrial large ribosomal subunit+++GO:0005840///ribosome+++GO:0015934///large ribosomal subunit+++[Molecular Function]---GO:0003735///structural constituent of ribosome+++[Biological Process]---GO:0006412///translation	cellular_component+++molecular_function+++biological_process	[Cellular Component]---organelle+++cell part+++cell+++membrane+++organelle part+++membrane-enclosed lumen+++protein-containing complex+++[Molecular Function]---structural molecule activity+++[Biological Process]---metabolic process+++cellular process
NM_001034278.1	CIRBP	mRNA	[Cellular Component]---GO:0005634///nucleus+++GO:0005654///nucleoplasm+++GO:0005681///spliceosomal complex+++GO:0005737///cytoplasm+++GO:0010494///cytoplasmic stress granule+++GO:1990904///ribonucleoprotein complex+++[Molecular Function]---GO:0003676///nucleic acid binding+++GO:0003723///RNA binding+++GO:0008266///poly(U) RNA binding+++GO:0030371///translation repressor activity+++[Biological Pro…	cellular_component+++molecular_function+++biological_process	[Cellular Component]---organelle+++cell part+++cell+++membrane-enclosed lumen+++organelle part+++protein-containing complex+++[Molecular Function]---binding+++translation regulator activity+++[Biological Process]---metabolic process+++regulation of biological process+++negative regulation of biological process+++cellular process+++biological regulation+++growth+++cellular component organization o…
NM_001034280.1	LTA4H	mRNA	[Cellular Component]---GO:0005634///nucleus+++GO:0005654///nucleoplasm+++GO:0005737///cytoplasm+++GO:0005829///cytosol+++[Molecular Function]---GO:0004177///aminopeptidase activity+++GO:0004301///epoxide hydrolase activity+++GO:0004463///leukotriene-A4 hydrolase activity+++GO:0008233///peptidase activity+++GO:0008237///metallopeptidase activity+++GO:0008270///zinc ion binding+++GO:0016787///hydro…	cellular_component+++molecular_function+++biological_process	[Cellular Component]---organelle+++cell part+++cell+++membrane-enclosed lumen+++organelle part+++[Molecular Function]---catalytic activity+++binding+++[Biological Process]---metabolic process+++cellular process
NM_001034281.2	ARL6IP6	mRNA	[Cellular Component]---GO:0005634///nucleus+++GO:0005637///nuclear inner membrane+++GO:0016020///membrane+++GO:0016021///integral component of membrane	cellular_component	[Cellular Component]---organelle+++cell part+++cell+++membrane+++organelle part+++membrane part
NM_001034282.1	SHMT2	mRNA	[Cellular Component]---GO:0005634///nucleus+++GO:0005737///cytoplasm+++GO:0005739///mitochondrion+++GO:0005743///mitochondrial inner membrane+++GO:0005759///mitochondrial matrix+++GO:0015630///microtubule cytoskeleton+++GO:0016020///membrane+++GO:0042645///mitochondrial nucleoid+++GO:0070552///BRISC complex+++[Molecular Function]---GO:0003682///chromatin binding+++GO:0003824///catalytic activity+…	cellular_component+++molecular_function+++biological_process	[Cellular Component]---organelle+++cell part+++cell+++membrane+++organelle part+++membrane-enclosed lumen+++nucleoid+++protein-containing complex+++[Molecular Function]---binding+++catalytic activity+++[Biological Process]---metabolic process+++regulation of biological process+++cellular process+++biological regulation+++immune system process+++response to stimulus+++cellular component organizati…
NM_001034283.2	MVB12A	mRNA	[Cellular Component]---GO:0000813///ESCRT I complex+++GO:0005634///nucleus+++GO:0005654///nucleoplasm+++GO:0005737///cytoplasm+++GO:0005768///endosome+++GO:0005794///Golgi apparatus+++GO:0005813///centrosome+++GO:0005815///microtubule organizing center+++GO:0005829///cytosol+++GO:0005856///cytoskeleton+++GO:0016020///membrane+++GO:0031902///late endosome membrane+++GO:0031982///vesicle+++[Molecul…	cellular_component+++molecular_function+++biological_process	[Cellular Component]---membrane+++organelle+++membrane part+++cell part+++protein-containing complex+++cell+++organelle part+++membrane-enclosed lumen+++[Molecular Function]---binding+++[Biological Process]---localization+++multi-organism process+++metabolic process+++cellular process+++regulation of biological process+++response to stimulus+++signaling+++biological regulation
NM_001034295.2	SIRT5	mRNA	[Cellular Component]---GO:0005634///nucleus+++GO:0005737///cytoplasm+++GO:0005739///mitochondrion+++GO:0005743///mitochondrial inner membrane+++GO:0005758///mitochondrial intermembrane space+++GO:0005759///mitochondrial matrix+++GO:0005829///cytosol+++[Molecular Function]---GO:0008270///zinc ion binding+++GO:0016740///transferase activity+++GO:0036054///protein-malonyllysine demalonylase activity…	cellular_component+++molecular_function+++biological_process	[Cellular Component]---organelle+++cell part+++cell+++membrane+++organelle part+++membrane-enclosed lumen+++[Molecular Function]---binding+++catalytic activity+++[Biological Process]---response to stimulus+++metabolic process+++cellular process+++regulation of biological process+++biological regulation+++negative regulation of biological process
NM_001034299.1	PGK1	mRNA	[Cellular Component]---GO:0005615///extracellular space+++GO:0005737///cytoplasm+++GO:0005829///cytosol+++GO:0045121///membrane raft+++[Molecular Function]---GO:0000166///nucleotide binding+++GO:0004618///phosphoglycerate kinase activity+++GO:0005524///ATP binding+++GO:0016301///kinase activity+++GO:0016740///transferase activity+++GO:0043531///ADP binding+++GO:0047134///protein-disulfide reducta…	cellular_component+++molecular_function+++biological_process	[Cellular Component]---extracellular region part+++extracellular region+++cell part+++cell+++membrane+++membrane part+++[Molecular Function]---binding+++catalytic activity+++[Biological Process]---metabolic process+++cellular process+++developmental process+++regulation of biological process+++negative regulation of biological process+++multicellular organismal process+++biological regulation+++r…
NM_001034304.2	LPAR5	mRNA	[Cellular Component]---GO:0005886///plasma membrane+++GO:0016020///membrane+++GO:0016021///integral component of membrane+++[Molecular Function]---GO:0004930///G protein-coupled receptor activity+++[Biological Process]---GO:0007165///signal transduction+++GO:0007186///G protein-coupled receptor signaling pathway+++GO:0032793///positive regulation of CREB transcription factor activity+++GO:0048266…	cellular_component+++molecular_function+++biological_process	[Cellular Component]---membrane+++cell part+++cell+++membrane part+++[Molecular Function]---molecular transducer activity+++[Biological Process]---regulation of biological process+++response to stimulus+++signaling+++cellular process+++biological regulation+++metabolic process+++positive regulation of biological process+++behavior+++multicellular organismal process
NM_001034306.2	TM4SF4	mRNA	[Cellular Component]---GO:0016020///membrane+++GO:0016021///integral component of membrane	cellular_component	[Cellular Component]---membrane+++membrane part
NM_001034311.2	IL22RA1	mRNA	[Cellular Component]---GO:0005886///plasma membrane+++GO:0016020///membrane+++GO:0016021///integral component of membrane+++[Molecular Function]---GO:0004896///cytokine receptor activity+++GO:0042015///interleukin-20 binding+++[Biological Process]---GO:0019221///cytokine-mediated signaling pathway+++GO:0050829///defense response to Gram-negative bacterium	cellular_component+++molecular_function+++biological_process	[Cellular Component]---membrane+++cell part+++cell+++membrane part+++[Molecular Function]---molecular transducer activity+++binding+++[Biological Process]---regulation of biological process+++response to stimulus+++signaling+++cellular process+++biological regulation+++multi-organism process
NM_001034322.2	FKBP4	mRNA	[Cellular Component]---GO:0005634///nucleus+++GO:0005654///nucleoplasm+++GO:0005737///cytoplasm+++GO:0005739///mitochondrion+++GO:0005829///cytosol+++GO:0005856///cytoskeleton+++GO:0005874///microtubule+++GO:0044295///axonal growth cone+++[Molecular Function]---GO:0003755///peptidyl-prolyl cis-trans isomerase activity+++GO:0005515///protein binding+++GO:0005524///ATP binding+++GO:0005525///GTP bi…	cellular_component+++molecular_function+++biological_process	[Cellular Component]---organelle+++cell part+++cell+++membrane-enclosed lumen+++organelle part+++supramolecular complex+++[Molecular Function]---catalytic activity+++binding+++[Biological Process]---metabolic process+++cellular process+++cellular component organization or biogenesis+++developmental process+++reproduction+++reproductive process+++multicellular organismal process+++multi-organism p…
NM_001034323.2	NQO2	mRNA	[Cellular Component]---GO:0005654///nucleoplasm+++GO:0005829///cytosol+++[Molecular Function]---GO:0001512///dihydronicotinamide riboside quinone reductase activity+++GO:0003955///NAD(P)H dehydrogenase (quinone) activity+++GO:0008270///zinc ion binding+++GO:0009055///electron transfer activity+++GO:0016491///oxidoreductase activity+++GO:0016661///oxidoreductase activity, acting on other nitrogeno…	cellular_component+++molecular_function+++biological_process	[Cellular Component]---membrane-enclosed lumen+++organelle+++cell part+++cell+++organelle part+++[Molecular Function]---catalytic activity+++binding+++[Biological Process]---metabolic process+++cellular process
NM_001034325.2	KIAA1191	mRNA	[Cellular Component]---GO:0005575///cellular_component+++GO:0005737///cytoplasm+++[Molecular Function]---GO:0003674///molecular_function+++GO:0016491///oxidoreductase activity+++[Biological Process]---GO:0008150///biological_process+++GO:0055114///oxidation-reduction process	cellular_component+++molecular_function+++biological_process	[Cellular Component]---cellular_component+++cell part+++cell+++[Molecular Function]---molecular_function+++catalytic activity+++[Biological Process]---biological_process+++metabolic process
NM_001034327.1	NR2C2AP	mRNA	[Cellular Component]---GO:0005634///nucleus+++GO:0005654///nucleoplasm	cellular_component	[Cellular Component]---organelle+++cell part+++cell+++membrane-enclosed lumen+++organelle part
NM_001034329.2	DDX56	mRNA	[Cellular Component]---GO:0005634///nucleus+++GO:0005730///nucleolus+++[Molecular Function]---GO:0000166///nucleotide binding+++GO:0003676///nucleic acid binding+++GO:0003723///RNA binding+++GO:0003724///RNA helicase activity+++GO:0004386///helicase activity+++GO:0005524///ATP binding+++GO:0016787///hydrolase activity+++[Biological Process]---GO:0006364///rRNA processing+++GO:0042254///ribosome b…	cellular_component+++molecular_function+++biological_process	[Cellular Component]---organelle+++cell part+++cell+++membrane-enclosed lumen+++organelle part+++[Molecular Function]---binding+++catalytic activity+++[Biological Process]---metabolic process+++cellular process+++cellular component organization or biogenesis
NM_001034330.1	PRPF4	mRNA	[Cellular Component]---GO:0005634///nucleus+++GO:0005681///spliceosomal complex+++GO:0015030///Cajal body+++GO:0016607///nuclear speck+++GO:0046540///U4/U6 x U5 tri-snRNP complex+++GO:0071001///U4/U6 snRNP+++GO:0071005///U2-type precatalytic spliceosome+++GO:0097525///spliceosomal snRNP complex+++[Molecular Function]---GO:0017070///U6 snRNA binding+++GO:0030621///U4 snRNA binding+++[Biological Pr…	cellular_component+++molecular_function+++biological_process	[Cellular Component]---organelle+++cell part+++cell+++protein-containing complex+++organelle part+++membrane-enclosed lumen+++[Molecular Function]---binding+++[Biological Process]---metabolic process+++cellular process
NM_001034332.2	MTFR1L	mRNA	[Cellular Component]---GO:0005739///mitochondrion+++[Biological Process]---GO:0000266///mitochondrial fission+++GO:0009060///aerobic respiration	cellular_component+++biological_process	[Cellular Component]---organelle+++cell part+++cell+++[Biological Process]---cellular process+++cellular component organization or biogenesis+++metabolic process
NM_001034334.1	LCK	mRNA	[Cellular Component]---GO:0000242///pericentriolar material+++GO:0001772///immunological synapse+++GO:0005623///cell+++GO:0005886///plasma membrane+++GO:0031234///extrinsic component of cytoplasmic side of plasma membrane+++GO:0045121///membrane raft+++[Molecular Function]---GO:0000166///nucleotide binding+++GO:0001784///phosphotyrosine residue binding+++GO:0004672///protein kinase activity+++GO:…	cellular_component+++molecular_function+++biological_process	[Cellular Component]---organelle+++cell part+++cell+++organelle part+++membrane+++membrane part+++[Molecular Function]---binding+++catalytic activity+++[Biological Process]---metabolic process+++cellular process+++biological regulation+++regulation of biological process+++positive regulation of biological process+++response to stimulus+++signaling+++developmental process+++immune system process++…
NM_001034338.2	CNIH4	mRNA	[Cellular Component]---GO:0005783///endoplasmic reticulum+++GO:0005793///endoplasmic reticulum-Golgi intermediate compartment+++GO:0016020///membrane+++GO:0016021///integral component of membrane+++[Molecular Function]---GO:0031730///CCR5 chemokine receptor binding+++[Biological Process]---GO:0006888///ER to Golgi vesicle-mediated transport+++GO:0015031///protein transport+++GO:0016192///vesicle-…	cellular_component+++molecular_function+++biological_process	[Cellular Component]---organelle+++cell part+++cell+++membrane+++membrane part+++[Molecular Function]---binding+++[Biological Process]---localization
NM_001034340.2	CCN1	mRNA	[Cellular Component]---GO:0005576///extracellular region+++GO:0031012///extracellular matrix+++[Molecular Function]---GO:0005178///integrin binding+++GO:0005520///insulin-like growth factor binding+++GO:0008201///heparin binding+++GO:0050840///extracellular matrix binding+++[Biological Process]---GO:0001649///osteoblast differentiation+++GO:0001934///positive regulation of protein phosphorylation…	cellular_component+++molecular_function+++biological_process	[Cellular Component]---extracellular region+++extracellular region part+++[Molecular Function]---binding+++[Biological Process]---developmental process+++multicellular organismal process+++cellular process+++metabolic process+++regulation of biological process+++positive regulation of biological process+++biological regulation+++biological adhesion+++response to stimulus+++signaling+++cellular co…
NM_001034342.2	ATF4	mRNA	[Cellular Component]---GO:0005634///nucleus+++GO:0005667///transcription factor complex+++GO:0005737///cytoplasm+++GO:0005813///centrosome+++GO:0005815///microtubule organizing center+++GO:0005856///cytoskeleton+++GO:0005886///plasma membrane+++GO:0016020///membrane+++GO:0032991///protein-containing complex+++GO:0034399///nuclear periphery+++GO:0043005///neuron projection+++GO:0090575///RNA polym…	cellular_component+++molecular_function+++biological_process	[Cellular Component]---organelle+++cell part+++cell+++protein-containing complex+++organelle part+++membrane+++membrane-enclosed lumen+++[Molecular Function]---binding+++transcription regulator activity+++[Biological Process]---metabolic process+++regulation of biological process+++cellular process+++biological regulation+++rhythmic process+++positive regulation of biological process+++multicellu…
NM_001034344.1	ETHE1	mRNA	[Cellular Component]---GO:0005634///nucleus+++GO:0005654///nucleoplasm+++GO:0005737///cytoplasm+++GO:0005739///mitochondrion+++GO:0005759///mitochondrial matrix+++[Molecular Function]---GO:0005506///iron ion binding+++GO:0016491///oxidoreductase activity+++GO:0016788///hydrolase activity, acting on ester bonds+++GO:0046872///metal ion binding+++GO:0050313///sulfur dioxygenase activity+++GO:005121…	cellular_component+++molecular_function+++biological_process	[Cellular Component]---organelle+++cell part+++cell+++membrane-enclosed lumen+++organelle part+++[Molecular Function]---binding+++catalytic activity+++[Biological Process]---metabolic process+++cellular process
NM_001034345.1	CCL19	mRNA	[Cellular Component]---GO:0005576///extracellular region+++GO:0005615///extracellular space+++GO:0005623///cell+++[Molecular Function]---GO:0005125///cytokine activity+++GO:0008009///chemokine activity+++GO:0031735///CCR10 chemokine receptor binding+++GO:0042379///chemokine receptor binding+++GO:0048020///CCR chemokine receptor binding+++[Biological Process]---GO:0001768///establishment of T cell…	cellular_component+++molecular_function+++biological_process	[Cellular Component]---extracellular region+++extracellular region part+++cell+++[Molecular Function]---binding+++molecular function regulator+++[Biological Process]---immune system process+++cellular process+++locomotion+++response to stimulus+++localization+++regulation of biological process+++signaling+++biological regulation+++positive regulation of biological process+++metabolic process+++ne…
NM_001034350.2	PERP	mRNA	[Cellular Component]---GO:0016020///membrane+++GO:0016021///integral component of membrane+++GO:0030054///cell junction+++[Biological Process]---GO:0002934///desmosome organization	cellular_component+++biological_process	[Cellular Component]---membrane+++membrane part+++cell junction+++[Biological Process]---cellular process+++cellular component organization or biogenesis
NM_001034352.1	BOLA1	mRNA	[Cellular Component]---GO:0005739///mitochondrion+++[Biological Process]---GO:0006351///transcription, DNA-templated	cellular_component+++biological_process	[Cellular Component]---organelle+++cell part+++cell+++[Biological Process]---metabolic process+++cellular process
NM_001034359.2	GET1	mRNA	[Cellular Component]---GO:0005783///endoplasmic reticulum+++GO:0005789///endoplasmic reticulum membrane+++GO:0016020///membrane+++GO:0016021///integral component of membrane+++[Biological Process]---GO:0006620///posttranslational protein targeting to endoplasmic reticulum membrane+++GO:0007605///sensory perception of sound+++GO:0050808///synapse organization+++GO:0071599///otic vesicle developmen…	cellular_component+++biological_process	[Cellular Component]---organelle+++cell part+++cell+++membrane+++membrane part+++organelle part+++[Biological Process]---localization+++multicellular organismal process+++cellular process+++cellular component organization or biogenesis+++developmental process
NM_001034362.2	BET1L	mRNA	[Cellular Component]---GO:0000138///Golgi trans cisterna+++GO:0000139///Golgi membrane+++GO:0005794///Golgi apparatus+++GO:0005829///cytosol+++GO:0016020///membrane+++GO:0016021///integral component of membrane+++GO:0030173///integral component of Golgi membrane+++GO:0031201///SNARE complex+++[Molecular Function]---GO:0005484///SNAP receptor activity+++[Biological Process]---GO:0015031///protein …	cellular_component+++molecular_function+++biological_process	[Cellular Component]---organelle+++cell part+++cell+++organelle part+++membrane+++membrane part+++protein-containing complex+++[Molecular Function]---binding+++[Biological Process]---localization+++cellular process+++cellular component organization or biogenesis+++regulation of biological process+++biological regulation
NM_001034364.2	TMEM54	mRNA	[Cellular Component]---GO:0016020///membrane+++GO:0016021///integral component of membrane	cellular_component	[Cellular Component]---membrane+++membrane part
NM_001034365.2	RBMS2	mRNA	[Cellular Component]---GO:0005634///nucleus+++GO:1990904///ribonucleoprotein complex+++[Molecular Function]---GO:0003676///nucleic acid binding+++GO:0003723///RNA binding	cellular_component+++molecular_function	[Cellular Component]---organelle+++cell part+++cell+++protein-containing complex+++[Molecular Function]---binding
NM_001034366.1	SUOX	mRNA	[Molecular Function]---GO:0016491///oxidoreductase activity+++GO:0020037///heme binding+++GO:0030151///molybdenum ion binding+++GO:0046872///metal ion binding+++[Biological Process]---GO:0042128///nitrate assimilation+++GO:0055114///oxidation-reduction process	molecular_function+++biological_process	[Molecular Function]---catalytic activity+++binding+++[Biological Process]---metabolic process+++cellular process
NM_001034373.2	CYP4V2	mRNA	[Cellular Component]---GO:0005789///endoplasmic reticulum membrane+++GO:0016020///membrane+++GO:0016021///integral component of membrane+++[Molecular Function]---GO:0004497///monooxygenase activity+++GO:0005506///iron ion binding+++GO:0016491///oxidoreductase activity+++GO:0016705///oxidoreductase activity, acting on paired donors, with incorporation or reduction of molecular oxygen+++GO:0020037/…	cellular_component+++molecular_function+++biological_process	[Cellular Component]---organelle+++membrane+++cell part+++membrane part+++cell+++organelle part+++[Molecular Function]---catalytic activity+++binding+++[Biological Process]---metabolic process+++cellular process
NM_001034381.2	PSMA4	mRNA	[Cellular Component]---GO:0000502///proteasome complex+++GO:0000932///P-body+++GO:0005634///nucleus+++GO:0005654///nucleoplasm+++GO:0005737///cytoplasm+++GO:0005829///cytosol+++GO:0005839///proteasome core complex+++GO:0019773///proteasome core complex, alpha-subunit complex+++GO:0043231///intracellular membrane-bounded organelle+++[Molecular Function]---GO:0004175///endopeptidase activity+++GO:0…	cellular_component+++molecular_function+++biological_process	[Cellular Component]---cell part+++protein-containing complex+++cell+++organelle+++membrane-enclosed lumen+++organelle part+++[Molecular Function]---catalytic activity+++[Biological Process]---metabolic process+++cellular process
NM_001034382.2	IVD	mRNA	[Cellular Component]---GO:0005739///mitochondrion+++GO:0005759///mitochondrial matrix+++[Molecular Function]---GO:0003995///acyl-CoA dehydrogenase activity+++GO:0004085///butyryl-CoA dehydrogenase activity+++GO:0008470///isovaleryl-CoA dehydrogenase activity+++GO:0016491///oxidoreductase activity+++GO:0016627///oxidoreductase activity, acting on the CH-CH group of donors+++GO:0042802///identical …	cellular_component+++molecular_function+++biological_process	[Cellular Component]---organelle+++cell part+++cell+++membrane-enclosed lumen+++organelle part+++[Molecular Function]---catalytic activity+++binding+++[Biological Process]---metabolic process+++cellular process
NM_001034389.1	TNFAIP8L2	mRNA	[Cellular Component]---GO:0005737///cytoplasm+++[Biological Process]---GO:0002376///immune system process+++GO:0042981///regulation of apoptotic process+++GO:0045087///innate immune response+++GO:0050728///negative regulation of inflammatory response+++GO:0050868///negative regulation of T cell activation	cellular_component+++biological_process	[Cellular Component]---cell part+++cell+++[Biological Process]---immune system process+++regulation of biological process+++cellular process+++biological regulation+++response to stimulus+++negative regulation of biological process+++biological adhesion
NM_001034390.1	POLE3	mRNA	[Cellular Component]---GO:0005634///nucleus+++GO:0005671///Ada2/Gcn5/Ada3 transcription activator complex+++GO:0008622///epsilon DNA polymerase complex+++GO:0008623///CHRAC+++[Molecular Function]---GO:0003677///DNA binding+++GO:0031490///chromatin DNA binding+++GO:0046982///protein heterodimerization activity+++[Biological Process]---GO:0006272///leading strand elongation+++GO:0006974///cellular …	cellular_component+++molecular_function+++biological_process	[Cellular Component]---organelle+++cell part+++cell+++membrane-enclosed lumen+++protein-containing complex+++organelle part+++[Molecular Function]---binding+++[Biological Process]---metabolic process+++cellular process+++response to stimulus+++cellular component organization or biogenesis+++regulation of biological process+++negative regulation of biological process+++biological regulation
NM_001034393.1	SFRP2	mRNA	[Cellular Component]---GO:0005576///extracellular region+++GO:0005615///extracellular space+++[Molecular Function]---GO:0008047///enzyme activator activity+++GO:0017147///Wnt-protein binding+++GO:0048018///receptor ligand activity+++GO:0061133///endopeptidase activator activity+++[Biological Process]---GO:0001569///branching involved in blood vessel morphogenesis+++GO:0001756///somitogenesis+++GO…	cellular_component+++molecular_function+++biological_process	[Cellular Component]---extracellular region+++extracellular region part+++[Molecular Function]---molecular function regulator+++binding+++[Biological Process]---developmental process+++multicellular organismal process+++cellular process+++regulation of biological process+++cell proliferation+++positive regulation of biological process+++biological regulation+++negative regulation of biological pr…
NM_001034394.2	CD1E	mRNA	[Cellular Component]---GO:0005615///extracellular space+++GO:0009897///external side of plasma membrane+++GO:0016020///membrane+++GO:0016021///integral component of membrane+++[Molecular Function]---GO:0030883///endogenous lipid antigen binding+++GO:0030884///exogenous lipid antigen binding+++GO:0071723///lipopeptide binding+++[Biological Process]---GO:0001916///positive regulation of T cell medi…	cellular_component+++molecular_function+++biological_process	[Cellular Component]---extracellular region part+++extracellular region+++membrane+++cell part+++membrane part+++cell+++[Molecular Function]---binding+++[Biological Process]---regulation of biological process+++immune system process+++response to stimulus+++positive regulation of biological process+++cell killing+++biological regulation
NM_001034396.2	NCBP2	mRNA	[Cellular Component]---GO:0005634///nucleus+++GO:0005654///nucleoplasm+++GO:0005737///cytoplasm+++GO:0005845///mRNA cap binding complex+++GO:0005846///nuclear cap binding complex+++GO:0034518///RNA cap binding complex+++[Molecular Function]---GO:0000339///RNA cap binding+++GO:0000340///RNA 7-methylguanosine cap binding+++GO:0003676///nucleic acid binding+++GO:0003723///RNA binding+++GO:0003729///…	cellular_component+++molecular_function+++biological_process	[Cellular Component]---organelle+++cell part+++cell+++membrane-enclosed lumen+++organelle part+++protein-containing complex+++[Molecular Function]---binding+++[Biological Process]---metabolic process+++regulation of biological process+++negative regulation of biological process+++cellular process+++biological regulation+++localization+++positive regulation of biological process
NM_001034399.1	FXYD6	mRNA	[Cellular Component]---GO:0005886///plasma membrane+++GO:0016020///membrane+++GO:0016021///integral component of membrane+++GO:0098978///glutamatergic synapse+++GO:0099055///integral component of postsynaptic membrane+++GO:0099056///integral component of presynaptic membrane+++[Molecular Function]---GO:0017080///sodium channel regulator activity+++GO:0099106///ion channel regulator activity+++[Bi…	cellular_component+++molecular_function+++biological_process	[Cellular Component]---membrane+++cell part+++cell+++membrane part+++synapse+++synapse part+++[Molecular Function]---molecular function regulator+++[Biological Process]---localization+++regulation of biological process+++biological regulation
NM_001034402.2	PRRG2	mRNA	[Cellular Component]---GO:0005576///extracellular region+++GO:0005615///extracellular space+++GO:0016020///membrane+++GO:0016021///integral component of membrane+++[Molecular Function]---GO:0005509///calcium ion binding	cellular_component+++molecular_function	[Cellular Component]---extracellular region+++extracellular region part+++membrane+++membrane part+++[Molecular Function]---binding
NM_001034408.2	POLR1E	mRNA	[Cellular Component]---GO:0001650///fibrillar center+++GO:0005654///nucleoplasm+++GO:0005730///nucleolus+++GO:0005736///RNA polymerase I complex+++GO:0042025///host cell nucleus+++[Molecular Function]---GO:0001179///RNA polymerase I transcription factor binding+++GO:0003677///DNA binding+++GO:0003899///DNA-directed 5'-3' RNA polymerase activity+++[Biological Process]---GO:0001188///RNA polymerase…	cellular_component+++molecular_function+++biological_process	[Cellular Component]---membrane-enclosed lumen+++organelle+++cell part+++cell+++organelle part+++protein-containing complex+++other organism part+++other organism+++[Molecular Function]---binding+++catalytic activity+++[Biological Process]---metabolic process+++cellular process+++cellular component organization or biogenesis
NM_001034409.2	EEPD1	mRNA	[Cellular Component]---GO:0046658///anchored component of plasma membrane+++[Molecular Function]---GO:0003677///DNA binding+++[Biological Process]---GO:0006281///DNA repair+++GO:0010875///positive regulation of cholesterol efflux	cellular_component+++molecular_function+++biological_process	[Cellular Component]---membrane+++cell part+++membrane part+++cell+++[Molecular Function]---binding+++[Biological Process]---metabolic process+++response to stimulus+++cellular process+++regulation of biological process+++localization+++positive regulation of biological process+++biological regulation
NM_001034410.2	CXCL14	mRNA	[Cellular Component]---GO:0005576///extracellular region+++GO:0005794///Golgi apparatus+++[Molecular Function]---GO:0008009///chemokine activity+++[Biological Process]---GO:0006955///immune response+++GO:0045662///negative regulation of myoblast differentiation+++GO:0048839///inner ear development+++GO:0060326///cell chemotaxis+++GO:0061844///antimicrobial humoral immune response mediated by anti…	cellular_component+++molecular_function+++biological_process	[Cellular Component]---extracellular region+++organelle+++cell part+++cell+++[Molecular Function]---binding+++molecular function regulator+++[Biological Process]---immune system process+++response to stimulus+++developmental process+++regulation of biological process+++negative regulation of biological process+++cellular process+++biological regulation+++multicellular organismal process+++locomot…
NM_001034415.1	MAEA	mRNA	[Cellular Component]---GO:0000151///ubiquitin ligase complex+++GO:0005634///nucleus+++GO:0005654///nucleoplasm+++GO:0005737///cytoplasm+++GO:0005819///spindle+++GO:0005826///actomyosin contractile ring+++GO:0005856///cytoskeleton+++GO:0005886///plasma membrane+++GO:0005887///integral component of plasma membrane+++GO:0015629///actin cytoskeleton+++GO:0016020///membrane+++GO:0016363///nuclear matr…	cellular_component+++molecular_function+++biological_process	[Cellular Component]---cell part+++protein-containing complex+++cell+++organelle+++membrane-enclosed lumen+++organelle part+++membrane+++membrane part+++[Molecular Function]---binding+++catalytic activity+++[Biological Process]---metabolic process+++cellular process+++cellular component organization or biogenesis+++biological adhesion+++regulation of biological process+++negative regulation of bi…
NM_001034418.1	RCSD1	mRNA	[Molecular Function]---GO:0051015///actin filament binding+++[Biological Process]---GO:0071474///cellular hyperosmotic response	molecular_function+++biological_process	[Molecular Function]---binding+++[Biological Process]---response to stimulus+++cellular process
NM_001034422.2	SPEF1	mRNA	[Cellular Component]---GO:0005737///cytoplasm+++GO:0005856///cytoskeleton+++GO:0005929///cilium+++GO:0005930///axoneme+++GO:0031514///motile cilium+++GO:0042995///cell projection+++[Molecular Function]---GO:0008017///microtubule binding+++[Biological Process]---GO:0007026///negative regulation of microtubule depolymerization+++GO:0016477///cell migration+++GO:0051493///regulation of cytoskeleton …	cellular_component+++molecular_function+++biological_process	[Cellular Component]---cell part+++cell+++organelle+++organelle part+++[Molecular Function]---binding+++[Biological Process]---regulation of biological process+++negative regulation of biological process+++cellular process+++cellular component organization or biogenesis+++biological regulation+++locomotion+++localization
NM_001034425.1	LZTFL1	mRNA	[Cellular Component]---GO:0005737///cytoplasm+++GO:0005829///cytosol+++[Molecular Function]---GO:0042802///identical protein binding+++GO:0044877///protein-containing complex binding+++[Biological Process]---GO:1903565///negative regulation of protein localization to cilium+++GO:1903568///negative regulation of protein localization to ciliary membrane	cellular_component+++molecular_function+++biological_process	[Cellular Component]---cell part+++cell+++[Molecular Function]---binding+++[Biological Process]---regulation of biological process+++negative regulation of biological process+++localization+++biological regulation
NM_001034427.2	RPA3	mRNA	[Cellular Component]---GO:0005634///nucleus+++GO:0005662///DNA replication factor A complex+++GO:0035861///site of double-strand break+++[Molecular Function]---GO:0003677///DNA binding+++GO:0003684///damaged DNA binding+++GO:0003697///single-stranded DNA binding+++[Biological Process]---GO:0000724///double-strand break repair via homologous recombination+++GO:0006260///DNA replication+++GO:000628…	cellular_component+++molecular_function+++biological_process	[Cellular Component]---organelle+++cell part+++cell+++membrane-enclosed lumen+++protein-containing complex+++organelle part+++[Molecular Function]---binding+++[Biological Process]---metabolic process+++response to stimulus+++cellular process+++regulation of biological process+++biological regulation+++cell proliferation
NM_001034432.2	CREB3L3	mRNA	[Cellular Component]---GO:0005634///nucleus+++GO:0005783///endoplasmic reticulum+++GO:0005789///endoplasmic reticulum membrane+++GO:0016020///membrane+++GO:0016021///integral component of membrane+++[Molecular Function]---GO:0000976///transcription regulatory region sequence-specific DNA binding+++GO:0000977///RNA polymerase II regulatory region sequence-specific DNA binding+++GO:0001228///DNA-bi…	cellular_component+++molecular_function+++biological_process	[Cellular Component]---organelle+++cell part+++cell+++membrane+++membrane part+++organelle part+++[Molecular Function]---binding+++transcription regulator activity+++[Biological Process]---metabolic process+++regulation of biological process+++cellular process+++biological regulation+++response to stimulus+++signaling+++positive regulation of biological process
NM_001034435.1	CTSK	mRNA	[Cellular Component]---GO:0005576///extracellular region+++GO:0005615///extracellular space+++GO:0005654///nucleoplasm+++GO:0005764///lysosome+++GO:0005886///plasma membrane+++GO:0009897///external side of plasma membrane+++GO:0016020///membrane+++GO:0016324///apical plasma membrane+++GO:0043231///intracellular membrane-bounded organelle+++[Molecular Function]---GO:0001968///fibronectin binding++…	cellular_component+++molecular_function+++biological_process	[Cellular Component]---extracellular region+++extracellular region part+++membrane-enclosed lumen+++organelle+++cell part+++cell+++organelle part+++membrane+++membrane part+++[Molecular Function]---binding+++catalytic activity+++[Biological Process]---metabolic process+++cellular process+++biological regulation+++immune system process+++response to stimulus+++multicellular organismal process+++de…
NM_001034436.1	PLSCR2	mRNA	[Cellular Component]---GO:0005886///plasma membrane+++GO:0016020///membrane+++GO:0016021///integral component of membrane+++[Molecular Function]---GO:0017128///phospholipid scramblase activity+++GO:0046872///metal ion binding+++[Biological Process]---GO:0017121///phospholipid scrambling	cellular_component+++molecular_function+++biological_process	[Cellular Component]---membrane+++cell part+++cell+++membrane part+++[Molecular Function]---transporter activity+++binding+++[Biological Process]---cellular process+++biological regulation+++cellular component organization or biogenesis
NM_001034437.1	CA3	mRNA	[Cellular Component]---GO:0005737///cytoplasm+++GO:0005829///cytosol+++[Molecular Function]---GO:0004089///carbonate dehydratase activity+++GO:0008270///zinc ion binding+++GO:0016151///nickel cation binding+++GO:0016829///lyase activity+++GO:0016836///hydro-lyase activity+++GO:0046872///metal ion binding+++[Biological Process]---GO:0006730///one-carbon metabolic process+++GO:0009617///response to…	cellular_component+++molecular_function+++biological_process	[Cellular Component]---cell part+++cell+++[Molecular Function]---catalytic activity+++binding+++[Biological Process]---metabolic process+++cellular process+++response to stimulus+++multi-organism process
NM_001034441.2	PSMD9	mRNA	[Cellular Component]---GO:0000502///proteasome complex+++GO:0005634///nucleus+++GO:0005737///cytoplasm+++[Biological Process]---GO:0070682///proteasome regulatory particle assembly	cellular_component+++biological_process	[Cellular Component]---cell part+++protein-containing complex+++cell+++organelle+++[Biological Process]---cellular process+++cellular component organization or biogenesis
NM_001034442.2	DYNLRB1	mRNA	[Cellular Component]---GO:0005737///cytoplasm+++GO:0005813///centrosome+++GO:0005856///cytoskeleton+++GO:0005868///cytoplasmic dynein complex+++GO:0005874///microtubule+++GO:0030286///dynein complex+++[Molecular Function]---GO:0003774///motor activity+++GO:0045505///dynein intermediate chain binding+++[Biological Process]---GO:0007018///microtubule-based movement	cellular_component+++molecular_function+++biological_process	[Cellular Component]---cell part+++cell+++organelle+++organelle part+++protein-containing complex+++supramolecular complex+++[Molecular Function]---catalytic activity+++binding+++[Biological Process]---cellular process
NM_001034444.1	CCDC115	mRNA	[Cellular Component]---GO:0005623///cell+++GO:0005764///lysosome+++GO:0005768///endosome+++GO:0005783///endoplasmic reticulum+++GO:0005793///endoplasmic reticulum-Golgi intermediate compartment+++GO:0016471///vacuolar proton-transporting V-type ATPase complex+++GO:0030137///COPI-coated vesicle+++GO:0031410///cytoplasmic vesicle+++GO:0042406///extrinsic component of endoplasmic reticulum membrane+…	cellular_component+++molecular_function+++biological_process	[Cellular Component]---cell+++organelle+++cell part+++membrane+++membrane part+++protein-containing complex+++organelle part+++[Molecular Function]---binding+++[Biological Process]---cellular process+++biological regulation+++cellular component organization or biogenesis+++response to stimulus+++metabolic process
NM_001034446.1	SFXN2	mRNA	[Cellular Component]---GO:0005739///mitochondrion+++GO:0016020///membrane+++GO:0016021///integral component of membrane+++GO:0031305///integral component of mitochondrial inner membrane+++GO:0031966///mitochondrial membrane+++[Molecular Function]---GO:0015075///ion transmembrane transporter activity+++GO:0022857///transmembrane transporter activity+++GO:0022889///serine transmembrane transporter …	cellular_component+++molecular_function+++biological_process	[Cellular Component]---organelle+++cell part+++cell+++membrane+++membrane part+++organelle part+++[Molecular Function]---transporter activity+++[Biological Process]---localization
NM_001034448.2	ITGB1BP1	mRNA	[Cellular Component]---GO:0001726///ruffle+++GO:0005634///nucleus+++GO:0005654///nucleoplasm+++GO:0005737///cytoplasm+++GO:0005829///cytosol+++GO:0005856///cytoskeleton+++GO:0005886///plasma membrane+++GO:0005925///focal adhesion+++GO:0016020///membrane+++GO:0016604///nuclear body+++GO:0030027///lamellipodium+++GO:0034451///centriolar satellite+++GO:0042995///cell projection+++GO:0048471///perinu…	cellular_component+++molecular_function+++biological_process	[Cellular Component]---cell part+++cell+++organelle+++membrane-enclosed lumen+++organelle part+++membrane+++cell junction+++[Molecular Function]---molecular function regulator+++binding+++[Biological Process]---developmental process+++multicellular organismal process+++cell proliferation+++metabolic process+++regulation of biological process+++negative regulation of biological process+++cellular …
NM_001034450.1	POLH	mRNA	[Cellular Component]---GO:0005634///nucleus+++GO:0005654///nucleoplasm+++GO:0005657///replication fork+++GO:0005829///cytosol+++GO:0035861///site of double-strand break+++[Molecular Function]---GO:0003684///damaged DNA binding+++GO:0003887///DNA-directed DNA polymerase activity+++[Biological Process]---GO:0000731///DNA synthesis involved in DNA repair+++GO:0006281///DNA repair+++GO:0006290///pyri…	cellular_component+++molecular_function+++biological_process	[Cellular Component]---organelle+++cell part+++cell+++membrane-enclosed lumen+++organelle part+++[Molecular Function]---binding+++catalytic activity+++[Biological Process]---metabolic process+++response to stimulus+++cellular process
NM_001034454.2	TMEM128	mRNA	[Cellular Component]---GO:0016020///membrane+++GO:0016021///integral component of membrane	cellular_component	[Cellular Component]---membrane+++membrane part
NM_001034456.1	MLF2	mRNA	[Cellular Component]---GO:0005634///nucleus+++GO:0005737///cytoplasm+++[Biological Process]---GO:0006355///regulation of transcription, DNA-templated	cellular_component+++biological_process	[Cellular Component]---organelle+++cell part+++cell+++[Biological Process]---metabolic process+++regulation of biological process+++cellular process+++biological regulation
NM_001034458.1	DNAJC19	mRNA	[Cellular Component]---GO:0001405///PAM complex, Tim23 associated import motor+++GO:0005739///mitochondrion+++GO:0005743///mitochondrial inner membrane+++GO:0016020///membrane+++GO:0016021///integral component of membrane+++[Molecular Function]---GO:0001671///ATPase activator activity+++[Biological Process]---GO:0015031///protein transport+++GO:0030150///protein import into mitochondrial matrix++…	cellular_component+++molecular_function+++biological_process	[Cellular Component]---membrane+++membrane-enclosed lumen+++organelle+++membrane part+++cell part+++protein-containing complex+++cell+++organelle part+++[Molecular Function]---molecular function regulator+++[Biological Process]---localization+++cellular process+++cellular component organization or biogenesis+++biological regulation
NM_001034461.2	TMEM106C	mRNA	[Cellular Component]---GO:0005783///endoplasmic reticulum+++GO:0005789///endoplasmic reticulum membrane+++GO:0016020///membrane+++GO:0016021///integral component of membrane	cellular_component	[Cellular Component]---organelle+++cell part+++cell+++membrane+++membrane part+++organelle part
NM_001034464.2	SNX5	mRNA	[Cellular Component]---GO:0001726///ruffle+++GO:0001891///phagocytic cup+++GO:0005737///cytoplasm+++GO:0005768///endosome+++GO:0005769///early endosome+++GO:0005829///cytosol+++GO:0005886///plasma membrane+++GO:0016020///membrane+++GO:0030659///cytoplasmic vesicle membrane+++GO:0031234///extrinsic component of cytoplasmic side of plasma membrane+++GO:0031313///extrinsic component of endosome memb…	cellular_component+++molecular_function+++biological_process	[Cellular Component]---cell part+++cell+++membrane+++membrane part+++organelle+++organelle part+++[Molecular Function]---binding+++[Biological Process]---localization
NM_001034475.2	NCSTN	mRNA	[Cellular Component]---GO:0005764///lysosome+++GO:0005783///endoplasmic reticulum+++GO:0005794///Golgi apparatus+++GO:0005886///plasma membrane+++GO:0005887///integral component of plasma membrane+++GO:0008021///synaptic vesicle+++GO:0016020///membrane+++GO:0016021///integral component of membrane+++GO:0032991///protein-containing complex+++GO:0070765///gamma-secretase complex+++[Molecular Functi…	cellular_component+++molecular_function+++biological_process	[Cellular Component]---organelle+++cell part+++cell+++membrane+++membrane part+++synapse+++synapse part+++protein-containing complex+++[Molecular Function]---catalytic activity+++[Biological Process]---immune system process+++biological regulation+++metabolic process+++regulation of biological process+++response to stimulus+++signaling+++cellular process+++behavior+++multicellular organismal proc…
NM_001034477.2	ARFIP2	mRNA	[Cellular Component]---GO:0005737///cytoplasm+++GO:0005794///Golgi apparatus+++GO:0016020///membrane+++GO:0032588///trans-Golgi network membrane+++[Molecular Function]---GO:0005543///phospholipid binding+++GO:0019904///protein domain specific binding+++[Biological Process]---GO:0006886///intracellular protein transport+++GO:0006914///autophagy+++GO:0034315///regulation of Arp2/3 complex-mediated …	cellular_component+++molecular_function+++biological_process	[Cellular Component]---cell part+++cell+++organelle+++membrane+++organelle part+++[Molecular Function]---binding+++[Biological Process]---localization+++metabolic process+++cellular process+++regulation of biological process+++positive regulation of biological process+++biological regulation+++cellular component organization or biogenesis
NM_001034478.1	SRP19	mRNA	[Cellular Component]---GO:0005730///nucleolus+++GO:0005737///cytoplasm+++GO:0005786///signal recognition particle, endoplasmic reticulum targeting+++GO:0048500///signal recognition particle+++[Molecular Function]---GO:0003723///RNA binding+++GO:0008312///7S RNA binding+++GO:0043022///ribosome binding+++[Biological Process]---GO:0006614///SRP-dependent cotranslational protein targeting to membrane…	cellular_component+++molecular_function+++biological_process	[Cellular Component]---membrane-enclosed lumen+++organelle+++cell part+++cell+++organelle part+++protein-containing complex+++[Molecular Function]---binding+++[Biological Process]---localization+++cellular process+++cellular component organization or biogenesis+++response to stimulus
NM_001034481.1	AMZ2	mRNA	[Molecular Function]---GO:0008233///peptidase activity+++GO:0008237///metallopeptidase activity+++[Biological Process]---GO:0006508///proteolysis	molecular_function+++biological_process	[Molecular Function]---catalytic activity+++[Biological Process]---metabolic process
NM_001034482.1	CDIPT	mRNA	[Cellular Component]---GO:0005794///Golgi apparatus+++GO:0016020///membrane+++GO:0016021///integral component of membrane+++[Molecular Function]---GO:0003881///CDP-diacylglycerol-inositol 3-phosphatidyltransferase activity+++GO:0016740///transferase activity+++GO:0016780///phosphotransferase activity, for other substituted phosphate groups+++[Biological Process]---GO:0006629///lipid metabolic pro…	cellular_component+++molecular_function+++biological_process	[Cellular Component]---organelle+++cell part+++cell+++membrane+++membrane part+++[Molecular Function]---catalytic activity+++[Biological Process]---metabolic process+++cellular process
NM_001034488.2	BDH2	mRNA	[Cellular Component]---GO:0005737///cytoplasm+++GO:0005829///cytosol+++[Molecular Function]---GO:0003858///3-hydroxybutyrate dehydrogenase activity+++GO:0016491///oxidoreductase activity+++GO:0016616///oxidoreductase activity, acting on the CH-OH group of donors, NAD or NADP as acceptor+++GO:0016628///oxidoreductase activity, acting on the CH-CH group of donors, NAD or NADP as acceptor+++GO:00512…	cellular_component+++molecular_function+++biological_process	[Cellular Component]---cell part+++cell+++[Molecular Function]---catalytic activity+++binding+++[Biological Process]---metabolic process+++cellular process+++developmental process+++biological regulation
NM_001034491.2	PDLIM4	mRNA	[Cellular Component]---GO:0001725///stress fiber+++GO:0005634///nucleus+++GO:0005737///cytoplasm+++GO:0005768///endosome+++GO:0005856///cytoskeleton+++GO:0005912///adherens junction+++GO:0016020///membrane+++GO:0030018///Z disc+++GO:0030027///lamellipodium+++GO:0030054///cell junction+++GO:0031901///early endosome membrane+++GO:0031905///early endosome lumen+++GO:0031941///filamentous actin+++GO:…	cellular_component+++molecular_function+++biological_process	[Cellular Component]---organelle+++cell part+++cell+++organelle part+++cell junction+++membrane+++supramolecular complex+++membrane-enclosed lumen+++protein-containing complex+++synapse+++synapse part+++membrane part+++[Molecular Function]---binding+++[Biological Process]---developmental process+++multicellular organismal process+++cellular process+++cellular component organization or biogenesis+…
NM_001034493.1	MRPL58	mRNA	[Cellular Component]---GO:0005739///mitochondrion+++GO:0005743///mitochondrial inner membrane+++GO:0005762///mitochondrial large ribosomal subunit+++GO:0005840///ribosome+++[Molecular Function]---GO:0003747///translation release factor activity+++GO:0004045///aminoacyl-tRNA hydrolase activity+++GO:0016150///translation release factor activity, codon nonspecific+++GO:0016787///hydrolase activity++…	cellular_component+++molecular_function+++biological_process	[Cellular Component]---organelle+++cell part+++cell+++membrane+++organelle part+++membrane-enclosed lumen+++protein-containing complex+++[Molecular Function]---binding+++catalytic activity+++[Biological Process]---metabolic process+++cellular process+++cellular component organization or biogenesis
NM_001034497.2	SLC25A34	mRNA	[Cellular Component]---GO:0005739///mitochondrion+++GO:0005743///mitochondrial inner membrane+++GO:0016020///membrane+++GO:0016021///integral component of membrane+++[Biological Process]---GO:0001835///blastocyst hatching	cellular_component+++biological_process	[Cellular Component]---organelle+++cell part+++cell+++membrane+++organelle part+++membrane part+++[Biological Process]---developmental process+++multicellular organismal process
NM_001034501.2	GRPEL1	mRNA	[Cellular Component]---GO:0001405///PAM complex, Tim23 associated import motor+++GO:0005654///nucleoplasm+++GO:0005739///mitochondrion+++GO:0005759///mitochondrial matrix+++[Molecular Function]---GO:0000774///adenyl-nucleotide exchange factor activity+++GO:0042803///protein homodimerization activity+++GO:0051082///unfolded protein binding+++GO:0051087///chaperone binding+++[Biological Process]---…	cellular_component+++molecular_function+++biological_process	[Cellular Component]---membrane+++membrane-enclosed lumen+++organelle+++membrane part+++cell part+++protein-containing complex+++cell+++organelle part+++[Molecular Function]---binding+++molecular function regulator+++[Biological Process]---cellular process+++localization+++cellular component organization or biogenesis+++biological regulation
NM_001034507.2	TMEM9B	mRNA	[Cellular Component]---GO:0016020///membrane+++GO:0016021///integral component of membrane	cellular_component	[Cellular Component]---membrane+++membrane part
NM_001034510.2	RNF181	mRNA	[Cellular Component]---GO:0005737///cytoplasm+++[Molecular Function]---GO:0004842///ubiquitin-protein transferase activity+++GO:0016740///transferase activity+++GO:0046872///metal ion binding+++GO:0061630///ubiquitin protein ligase activity+++[Biological Process]---GO:0016567///protein ubiquitination+++GO:0051865///protein autoubiquitination	cellular_component+++molecular_function+++biological_process	[Cellular Component]---cell part+++cell+++[Molecular Function]---catalytic activity+++binding+++[Biological Process]---metabolic process+++cellular process
NM_001034513.1	CBR1	mRNA	[Cellular Component]---GO:0005737///cytoplasm+++[Molecular Function]---GO:0004090///carbonyl reductase (NADPH) activity+++GO:0016404///15-hydroxyprostaglandin dehydrogenase (NAD+) activity+++GO:0016491///oxidoreductase activity+++GO:0047021///15-hydroxyprostaglandin dehydrogenase (NADP+) activity+++GO:0047044///androstan-3-alpha,17-beta-diol dehydrogenase activity+++GO:0050221///prostaglandin-E2 …	cellular_component+++molecular_function+++biological_process	[Cellular Component]---cell part+++cell+++[Molecular Function]---catalytic activity+++[Biological Process]---metabolic process+++cellular process
NM_001034515.1	GPRC5A	mRNA	[Cellular Component]---GO:0005730///nucleolus+++GO:0005886///plasma membrane+++GO:0016020///membrane+++GO:0016021///integral component of membrane+++GO:0031982///vesicle+++GO:0043231///intracellular membrane-bounded organelle+++GO:0043235///receptor complex+++GO:0070062///extracellular exosome+++[Molecular Function]---GO:0004930///G protein-coupled receptor activity+++GO:0030295///protein kinase …	cellular_component+++molecular_function+++biological_process	[Cellular Component]---membrane-enclosed lumen+++organelle+++cell part+++cell+++organelle part+++membrane+++membrane part+++protein-containing complex+++extracellular region part+++extracellular region+++[Molecular Function]---molecular transducer activity+++molecular function regulator+++[Biological Process]---regulation of biological process+++response to stimulus+++signaling+++cellular process…
NM_001034518.1	CYB5R1	mRNA	[Cellular Component]---GO:0016020///membrane+++GO:0016021///integral component of membrane+++[Molecular Function]---GO:0004128///cytochrome-b5 reductase activity, acting on NAD(P)H+++GO:0016491///oxidoreductase activity+++GO:0071949///FAD binding+++[Biological Process]---GO:0006629///lipid metabolic process+++GO:0006694///steroid biosynthetic process+++GO:0008202///steroid metabolic process+++GO:…	cellular_component+++molecular_function+++biological_process	[Cellular Component]---membrane+++membrane part+++[Molecular Function]---catalytic activity+++binding+++[Biological Process]---metabolic process
NM_001034519.1	PTRH2	mRNA	[Cellular Component]---GO:0005739///mitochondrion+++GO:0005829///cytosol+++[Molecular Function]---GO:0004045///aminoacyl-tRNA hydrolase activity+++GO:0016787///hydrolase activity+++[Biological Process]---GO:2000210///positive regulation of anoikis+++GO:2000811///negative regulation of anoikis	cellular_component+++molecular_function+++biological_process	[Cellular Component]---organelle+++cell part+++cell+++[Molecular Function]---catalytic activity+++[Biological Process]---regulation of biological process+++positive regulation of biological process+++cellular process+++biological regulation+++negative regulation of biological process
NM_001034523.2	AP2M1	mRNA	[Cellular Component]---GO:0005886///plasma membrane+++GO:0005905///clathrin-coated pit+++GO:0016020///membrane+++GO:0030122///AP-2 adaptor complex+++GO:0030131///clathrin adaptor complex+++GO:0031410///cytoplasmic vesicle+++GO:0043231///intracellular membrane-bounded organelle+++[Molecular Function]---GO:0008289///lipid binding+++GO:0035615///clathrin adaptor activity+++[Biological Process]---GO:…	cellular_component+++molecular_function+++biological_process	[Cellular Component]---membrane+++cell part+++cell+++membrane part+++organelle+++protein-containing complex+++organelle part+++[Molecular Function]---binding+++cargo receptor activity+++[Biological Process]---localization
NM_001034524.2	HSPA9	mRNA	[Cellular Component]---GO:0005634///nucleus+++GO:0005730///nucleolus+++GO:0005737///cytoplasm+++GO:0005739///mitochondrion+++GO:0005759///mitochondrial matrix+++GO:0042645///mitochondrial nucleoid+++[Molecular Function]---GO:0000166///nucleotide binding+++GO:0005524///ATP binding+++GO:0016887///ATPase activity+++GO:0019899///enzyme binding+++GO:0031072///heat shock protein binding+++GO:0031625///…	cellular_component+++molecular_function+++biological_process	[Cellular Component]---organelle+++cell part+++cell+++membrane-enclosed lumen+++organelle part+++nucleoid+++[Molecular Function]---binding+++catalytic activity+++[Biological Process]---cellular process+++localization+++response to stimulus+++metabolic process+++cellular component organization or biogenesis+++developmental process+++immune system process+++multicellular organismal process+++biolog…
NM_001034525.1	NOL11	mRNA	[Cellular Component]---GO:0005634///nucleus+++GO:0005730///nucleolus+++GO:0034455///t-UTP complex+++[Biological Process]---GO:0006364///rRNA processing+++GO:0030490///maturation of SSU-rRNA+++GO:0042254///ribosome biogenesis+++GO:1901838///positive regulation of transcription of nucleolar large rRNA by RNA polymerase I	cellular_component+++biological_process	[Cellular Component]---organelle+++cell part+++cell+++membrane-enclosed lumen+++organelle part+++protein-containing complex+++[Biological Process]---metabolic process+++cellular process+++cellular component organization or biogenesis+++regulation of biological process+++positive regulation of biological process+++biological regulation
NM_001034531.1	CHEK2	mRNA	[Cellular Component]---GO:0000781///chromosome, telomeric region+++GO:0005634///nucleus+++GO:0005654///nucleoplasm+++GO:0005737///cytoplasm+++GO:0005794///Golgi apparatus+++GO:0016605///PML body+++[Molecular Function]---GO:0004672///protein kinase activity+++GO:0004674///protein serine/threonine kinase activity+++GO:0005524///ATP binding+++GO:0016301///kinase activity+++GO:0019901///protein kinas…	cellular_component+++molecular_function+++biological_process	[Cellular Component]---organelle+++cell part+++cell+++organelle part+++membrane-enclosed lumen+++[Molecular Function]---catalytic activity+++binding+++[Biological Process]---cellular process+++developmental process+++metabolic process+++response to stimulus+++regulation of biological process+++biological regulation+++signaling+++negative regulation of biological process+++positive regulation of b…
NM_001034537.1	GAL3ST4	mRNA	[Cellular Component]---GO:0005794///Golgi apparatus+++GO:0016020///membrane+++GO:0016021///integral component of membrane+++GO:0032580///Golgi cisterna membrane+++[Molecular Function]---GO:0001733///galactosylceramide sulfotransferase activity+++GO:0008146///sulfotransferase activity+++GO:0016740///transferase activity+++GO:0050694///galactose 3-O-sulfotransferase activity+++[Biological Process]-…	cellular_component+++molecular_function+++biological_process	[Cellular Component]---organelle+++cell part+++cell+++membrane+++membrane part+++organelle part+++[Molecular Function]---catalytic activity+++[Biological Process]---metabolic process+++cellular process
NM_001034540.2	PEX19	mRNA	[Cellular Component]---GO:0005634///nucleus+++GO:0005737///cytoplasm+++GO:0005777///peroxisome+++GO:0005778///peroxisomal membrane+++GO:0016020///membrane+++GO:0016021///integral component of membrane+++[Biological Process]---GO:0006625///protein targeting to peroxisome+++GO:0007031///peroxisome organization+++GO:0016557///peroxisome membrane biogenesis	cellular_component+++biological_process	[Cellular Component]---organelle+++cell part+++cell+++membrane+++organelle part+++membrane part+++[Biological Process]---localization+++cellular process+++cellular component organization or biogenesis
NM_001034541.1	MMADHC	mRNA	[Cellular Component]---GO:0005737///cytoplasm+++GO:0005739///mitochondrion+++[Biological Process]---GO:0009108///coenzyme biosynthetic process+++GO:0009235///cobalamin metabolic process+++GO:0051186///cofactor metabolic process	cellular_component+++biological_process	[Cellular Component]---cell part+++cell+++organelle+++[Biological Process]---metabolic process+++cellular process
NM_001034543.1	YIPF5	mRNA	[Cellular Component]---GO:0005654///nucleoplasm+++GO:0005783///endoplasmic reticulum+++GO:0005789///endoplasmic reticulum membrane+++GO:0005794///Golgi apparatus+++GO:0016020///membrane+++GO:0016021///integral component of membrane+++GO:0030134///COPII-coated ER to Golgi transport vesicle+++GO:0031410///cytoplasmic vesicle+++GO:0042175///nuclear outer membrane-endoplasmic reticulum membrane netwo…	cellular_component+++biological_process	[Cellular Component]---membrane-enclosed lumen+++organelle+++cell part+++cell+++organelle part+++membrane+++membrane part+++[Biological Process]---localization+++regulation of biological process+++cellular process+++biological regulation
NM_001034547.1	EMC4	mRNA	[Cellular Component]---GO:0016020///membrane+++GO:0016021///integral component of membrane+++GO:0072546///ER membrane protein complex+++[Biological Process]---GO:0006915///apoptotic process	cellular_component+++biological_process	[Cellular Component]---membrane+++membrane part+++organelle+++cell part+++protein-containing complex+++cell+++organelle part+++[Biological Process]---cellular process
NM_001034548.1	SF3A3	mRNA	[Cellular Component]---GO:0005634///nucleus+++GO:0005654///nucleoplasm+++GO:0005681///spliceosomal complex+++GO:0005686///U2 snRNP+++GO:0016607///nuclear speck+++GO:0071005///U2-type precatalytic spliceosome+++GO:0071013///catalytic step 2 spliceosome+++[Molecular Function]---GO:0003676///nucleic acid binding+++GO:0003723///RNA binding+++GO:0008270///zinc ion binding+++[Biological Process]---GO:0…	cellular_component+++molecular_function+++biological_process	[Cellular Component]---organelle+++cell part+++cell+++membrane-enclosed lumen+++organelle part+++protein-containing complex+++[Molecular Function]---binding+++[Biological Process]---metabolic process+++cellular process+++cellular component organization or biogenesis
NM_001034551.2	SFT2D1	mRNA	[Cellular Component]---GO:0016020///membrane+++GO:0016021///integral component of membrane+++[Biological Process]---GO:0015031///protein transport+++GO:0016192///vesicle-mediated transport	cellular_component+++biological_process	[Cellular Component]---membrane+++membrane part+++[Biological Process]---localization
NM_001034555.3	S100B	mRNA	[Cellular Component]---GO:0001726///ruffle+++GO:0005634///nucleus+++GO:0005654///nucleoplasm+++GO:0005737///cytoplasm+++GO:0005829///cytosol+++GO:0043025///neuronal cell body+++GO:0043231///intracellular membrane-bounded organelle+++GO:0048471///perinuclear region of cytoplasm+++[Molecular Function]---GO:0005509///calcium ion binding+++GO:0005515///protein binding+++GO:0008270///zinc ion binding+…	cellular_component+++molecular_function+++biological_process	[Cellular Component]---cell part+++cell+++organelle+++membrane-enclosed lumen+++organelle part+++[Molecular Function]---binding+++molecular function regulator+++[Biological Process]---metabolic process+++regulation of biological process+++cellular process+++biological regulation+++developmental process+++multicellular organismal process+++cellular component organization or biogenesis+++behavior++…
NM_001034557.2	NSFL1C	mRNA	[Cellular Component]---GO:0005623///cell+++GO:0005634///nucleus+++GO:0005654///nucleoplasm+++GO:0005694///chromosome+++GO:0005737///cytoplasm+++GO:0005794///Golgi apparatus+++GO:0005795///Golgi stack+++GO:0005815///microtubule organizing center+++GO:0005829///cytosol+++GO:0005856///cytoskeleton+++GO:0005886///plasma membrane+++GO:0045111///intermediate filament cytoskeleton+++[Molecular Function]…	cellular_component+++molecular_function+++biological_process	[Cellular Component]---cell+++organelle+++cell part+++membrane-enclosed lumen+++organelle part+++membrane+++[Molecular Function]---binding+++[Biological Process]---metabolic process+++cellular process+++cellular component organization or biogenesis+++localization+++regulation of biological process+++positive regulation of biological process+++biological regulation+++negative regulation of biologi…
NM_001034566.1	PELO	mRNA	[Cellular Component]---GO:0005634///nucleus+++GO:0005737///cytoplasm+++[Molecular Function]---GO:0004518///nuclease activity+++GO:0004519///endonuclease activity+++GO:0016787///hydrolase activity+++GO:0043022///ribosome binding+++GO:0046872///metal ion binding+++[Biological Process]---GO:0001833///inner cell mass cell proliferation+++GO:0007492///endoderm development+++GO:0019827///stem cell popu…	cellular_component+++molecular_function+++biological_process	[Cellular Component]---organelle+++cell part+++cell+++[Molecular Function]---catalytic activity+++binding+++[Biological Process]---developmental process+++cell proliferation+++multicellular organismal process+++growth+++metabolic process+++regulation of biological process+++response to stimulus+++signaling+++positive regulation of biological process+++cellular process+++biological regulation+++ce…
NM_001034569.2	PLEKHJ1	mRNA	[Cellular Component]---GO:0005769///early endosome+++GO:0005802///trans-Golgi network+++GO:0005829///cytosol+++GO:0055037///recycling endosome+++[Biological Process]---GO:0001881///receptor recycling+++GO:0007032///endosome organization+++GO:0042147///retrograde transport, endosome to Golgi	cellular_component+++biological_process	[Cellular Component]---organelle+++cell part+++cell+++organelle part+++[Biological Process]---metabolic process+++regulation of biological process+++signaling+++cellular process+++biological regulation+++cellular component organization or biogenesis+++localization
NM_001034571.2	DDX19A	mRNA	[Cellular Component]---GO:0005634///nucleus+++GO:0005643///nuclear pore+++GO:0005654///nucleoplasm+++GO:0005737///cytoplasm+++GO:0010494///cytoplasmic stress granule+++GO:0031965///nuclear membrane+++[Molecular Function]---GO:0000166///nucleotide binding+++GO:0003676///nucleic acid binding+++GO:0003723///RNA binding+++GO:0003724///RNA helicase activity+++GO:0004386///helicase activity+++GO:000552…	cellular_component+++molecular_function+++biological_process	[Cellular Component]---organelle+++cell part+++cell+++protein-containing complex+++organelle part+++membrane-enclosed lumen+++membrane+++[Molecular Function]---binding+++catalytic activity+++[Biological Process]---metabolic process+++localization
NM_001034572.2	PHB	mRNA	[Cellular Component]---GO:0005634///nucleus+++GO:0005654///nucleoplasm+++GO:0005737///cytoplasm+++GO:0005739///mitochondrion+++GO:0005743///mitochondrial inner membrane+++GO:0005769///early endosome+++GO:0005886///plasma membrane+++GO:0005887///integral component of plasma membrane+++GO:0009986///cell surface+++GO:0016020///membrane+++[Molecular Function]---GO:0000976///transcription regulatory r…	cellular_component+++molecular_function+++biological_process	[Cellular Component]---organelle+++cell part+++cell+++membrane-enclosed lumen+++organelle part+++membrane+++membrane part+++[Molecular Function]---binding+++transcription regulator activity+++[Biological Process]---metabolic process+++regulation of biological process+++negative regulation of biological process+++cellular process+++biological regulation+++cellular component organization or biogene…
NM_001034573.1	DCK	mRNA	[Cellular Component]---GO:0000786///nucleosome+++GO:0005634///nucleus+++GO:0005654///nucleoplasm+++GO:0005694///chromosome+++GO:0005737///cytoplasm+++GO:0005739///mitochondrion+++GO:0042025///host cell nucleus+++[Molecular Function]---GO:0000166///nucleotide binding+++GO:0003677///DNA binding+++GO:0004136///deoxyadenosine kinase activity+++GO:0004137///deoxycytidine kinase activity+++GO:0004138//…	cellular_component+++molecular_function+++biological_process	[Cellular Component]---organelle+++cell part+++protein-containing complex+++cell+++organelle part+++membrane-enclosed lumen+++other organism part+++other organism+++[Molecular Function]---binding+++catalytic activity+++[Biological Process]---metabolic process+++cellular process
NM_001034576.2	MRPL24	mRNA	[Cellular Component]---GO:0005739///mitochondrion+++GO:0005743///mitochondrial inner membrane+++GO:0005762///mitochondrial large ribosomal subunit+++GO:0005840///ribosome+++[Molecular Function]---GO:0003735///structural constituent of ribosome+++[Biological Process]---GO:0006412///translation	cellular_component+++molecular_function+++biological_process	[Cellular Component]---organelle+++cell part+++cell+++membrane+++organelle part+++membrane-enclosed lumen+++protein-containing complex+++[Molecular Function]---structural molecule activity+++[Biological Process]---metabolic process+++cellular process
NM_001034577.2	TASP1	mRNA	[Cellular Component]---GO:0005737///cytoplasm+++[Molecular Function]---GO:0004298///threonine-type endopeptidase activity+++GO:0016787///hydrolase activity+++GO:0042802///identical protein binding+++[Biological Process]---GO:0006508///proteolysis+++GO:0045893///positive regulation of transcription, DNA-templated+++GO:0051604///protein maturation	cellular_component+++molecular_function+++biological_process	[Cellular Component]---cell part+++cell+++[Molecular Function]---catalytic activity+++binding+++[Biological Process]---metabolic process+++regulation of biological process+++positive regulation of biological process+++cellular process+++biological regulation
NM_001034578.1	LRRC59	mRNA	[Cellular Component]---GO:0005634///nucleus+++GO:0005635///nuclear envelope+++GO:0005783///endoplasmic reticulum+++GO:0005789///endoplasmic reticulum membrane+++GO:0016020///membrane+++GO:0016021///integral component of membrane+++GO:0031090///organelle membrane+++GO:0042645///mitochondrial nucleoid+++GO:0043231///intracellular membrane-bounded organelle	cellular_component	[Cellular Component]---organelle+++cell part+++cell+++organelle part+++membrane+++membrane part+++membrane-enclosed lumen+++nucleoid
NM_001034579.2	ATG5	mRNA	[Cellular Component]---GO:0005737///cytoplasm+++GO:0005776///autophagosome+++GO:0005930///axoneme+++GO:0016020///membrane+++GO:0034045///phagophore assembly site membrane+++GO:0034274///Atg12-Atg5-Atg16 complex+++GO:0044233///Mitochondria-associated ER Membrane+++[Biological Process]---GO:0000045///autophagosome assembly+++GO:0000422///autophagy of mitochondrion+++GO:0001974///blood vessel remode…	cellular_component+++biological_process	[Cellular Component]---cell part+++cell+++organelle+++organelle part+++membrane+++protein-containing complex+++[Biological Process]---metabolic process+++cellular process+++cellular component organization or biogenesis+++multicellular organismal process+++immune system process+++regulation of biological process+++localization+++response to stimulus+++biological regulation+++multi-organism process…
NM_001034581.2	RNF38	mRNA	[Cellular Component]---GO:0005634///nucleus+++GO:0005654///nucleoplasm+++[Molecular Function]---GO:0061630///ubiquitin protein ligase activity+++[Biological Process]---GO:0016567///protein ubiquitination	cellular_component+++molecular_function+++biological_process	[Cellular Component]---organelle+++cell part+++cell+++membrane-enclosed lumen+++organelle part+++[Molecular Function]---catalytic activity+++[Biological Process]---metabolic process+++cellular process
NM_001034582.2	WARS2	mRNA	[Cellular Component]---GO:0005739///mitochondrion+++GO:0005759///mitochondrial matrix+++GO:0005829///cytosol+++GO:0005886///plasma membrane+++[Molecular Function]---GO:0000166///nucleotide binding+++GO:0004812///aminoacyl-tRNA ligase activity+++GO:0004830///tryptophan-tRNA ligase activity+++GO:0005524///ATP binding+++GO:0016874///ligase activity+++[Biological Process]---GO:0001570///vasculogenesi…	cellular_component+++molecular_function+++biological_process	[Cellular Component]---organelle+++cell part+++cell+++membrane-enclosed lumen+++organelle part+++membrane+++[Molecular Function]---binding+++catalytic activity+++[Biological Process]---developmental process+++multicellular organismal process+++cellular process+++metabolic process
NM_001034584.1	MSH2	mRNA	[Cellular Component]---GO:0005634///nucleus+++GO:0005694///chromosome+++GO:0032300///mismatch repair complex+++GO:0032301///MutSalpha complex+++GO:0032302///MutSbeta complex+++[Molecular Function]---GO:0000166///nucleotide binding+++GO:0000287///magnesium ion binding+++GO:0000400///four-way junction DNA binding+++GO:0000406///double-strand/single-strand DNA junction binding+++GO:0003677///DNA bin…	cellular_component+++molecular_function+++biological_process	[Cellular Component]---organelle+++cell part+++cell+++protein-containing complex+++organelle part+++[Molecular Function]---binding+++catalytic activity+++[Biological Process]---developmental process+++multicellular organismal process+++metabolic process+++immune system process+++response to stimulus+++cellular process+++regulation of biological process+++negative regulation of biological process+…
NM_001034585.2	ACTC1	mRNA	[Cellular Component]---GO:0005737///cytoplasm+++GO:0005856///cytoskeleton+++GO:0005884///actin filament+++GO:0015629///actin cytoskeleton+++GO:0030017///sarcomere+++GO:0030027///lamellipodium+++GO:0030175///filopodium+++GO:0031674///I band+++GO:0042643///actomyosin, actin portion+++GO:0044297///cell body+++GO:0045202///synapse+++GO:0098978///glutamatergic synapse+++[Molecular Function]---GO:00001…	cellular_component+++molecular_function+++biological_process	[Cellular Component]---cell part+++cell+++organelle+++supramolecular complex+++organelle part+++synapse+++[Molecular Function]---binding+++catalytic activity+++[Biological Process]---cellular process+++cellular component organization or biogenesis+++metabolic process+++regulation of biological process+++positive regulation of biological process+++biological regulation+++developmental process+++ne…
NM_001034592.1	DNAJB2	mRNA	[Cellular Component]---GO:0000502///proteasome complex+++GO:0005634///nucleus+++GO:0005829///cytosol+++GO:0031227///intrinsic component of endoplasmic reticulum membrane+++GO:0031965///nuclear membrane+++[Molecular Function]---GO:0001671///ATPase activator activity+++GO:0030544///Hsp70 protein binding+++GO:0043130///ubiquitin binding+++GO:0051082///unfolded protein binding+++GO:0051087///chaperon…	cellular_component+++molecular_function+++biological_process	[Cellular Component]---cell part+++protein-containing complex+++cell+++organelle+++membrane+++membrane part+++organelle part+++[Molecular Function]---molecular function regulator+++binding+++[Biological Process]---regulation of biological process+++cell proliferation+++negative regulation of biological process+++cellular process+++biological regulation+++growth+++cellular component organization o…
NM_001034598.1	NFYC	mRNA	[Cellular Component]---GO:0005634///nucleus+++GO:0005654///nucleoplasm+++GO:0016602///CCAAT-binding factor complex+++GO:0032993///protein-DNA complex+++GO:0090575///RNA polymerase II transcription factor complex+++[Molecular Function]---GO:0000978///RNA polymerase II proximal promoter sequence-specific DNA binding+++GO:0001228///DNA-binding transcription activator activity, RNA polymerase II-spec…	cellular_component+++molecular_function+++biological_process	[Cellular Component]---organelle+++cell part+++cell+++membrane-enclosed lumen+++organelle part+++protein-containing complex+++[Molecular Function]---binding+++transcription regulator activity+++[Biological Process]---metabolic process+++regulation of biological process+++cellular process+++biological regulation+++positive regulation of biological process
NM_001034600.2	BDH1	mRNA	[Cellular Component]---GO:0005654///nucleoplasm+++GO:0005739///mitochondrion+++GO:0005743///mitochondrial inner membrane+++GO:0005759///mitochondrial matrix+++GO:0016020///membrane+++GO:0099617///matrix side of mitochondrial inner membrane+++[Molecular Function]---GO:0003824///catalytic activity+++GO:0003858///3-hydroxybutyrate dehydrogenase activity+++GO:0016491///oxidoreductase activity+++[Biol…	cellular_component+++molecular_function+++biological_process	[Cellular Component]---membrane-enclosed lumen+++organelle+++cell part+++cell+++organelle part+++membrane+++membrane part+++[Molecular Function]---catalytic activity+++[Biological Process]---metabolic process
NM_001034605.2	KXD1	mRNA	[Cellular Component]---GO:0005764///lysosome+++GO:0005765///lysosomal membrane+++GO:0016020///membrane+++GO:0031083///BLOC-1 complex+++GO:0099078///BORC complex+++[Biological Process]---GO:0016192///vesicle-mediated transport+++GO:0032418///lysosome localization	cellular_component+++biological_process	[Cellular Component]---organelle+++cell part+++cell+++membrane+++organelle part+++protein-containing complex+++[Biological Process]---localization
NM_001034606.1	STX17	mRNA	[Cellular Component]---GO:0000421///autophagosome membrane+++GO:0005737///cytoplasm+++GO:0005739///mitochondrion+++GO:0005776///autophagosome+++GO:0005783///endoplasmic reticulum+++GO:0005789///endoplasmic reticulum membrane+++GO:0005793///endoplasmic reticulum-Golgi intermediate compartment+++GO:0005829///cytosol+++GO:0012505///endomembrane system+++GO:0012507///ER to Golgi transport vesicle mem…	cellular_component+++molecular_function+++biological_process	[Cellular Component]---membrane+++organelle+++cell part+++cell+++organelle part+++membrane part+++protein-containing complex+++[Molecular Function]---binding+++[Biological Process]---localization+++cellular process+++cellular component organization or biogenesis+++metabolic process
NM_001034608.2	MRPL18	mRNA	[Cellular Component]---GO:0005739///mitochondrion+++GO:0005743///mitochondrial inner membrane+++GO:0005762///mitochondrial large ribosomal subunit+++GO:0005840///ribosome+++[Molecular Function]---GO:0003723///RNA binding+++GO:0003735///structural constituent of ribosome+++GO:0008097///5S rRNA binding+++[Biological Process]---GO:0006412///translation+++GO:0035928///rRNA import into mitochondrion	cellular_component+++molecular_function+++biological_process	[Cellular Component]---organelle+++cell part+++cell+++membrane+++organelle part+++membrane-enclosed lumen+++protein-containing complex+++[Molecular Function]---binding+++structural molecule activity+++[Biological Process]---metabolic process+++cellular process+++localization
NM_001034611.2	PDZK1	mRNA	[Cellular Component]---GO:0005886///plasma membrane+++GO:0005903///brush border+++GO:0016020///membrane+++GO:0031526///brush border membrane+++[Molecular Function]---GO:0030165///PDZ domain binding+++[Biological Process]---GO:0015879///carnitine transport+++GO:0032414///positive regulation of ion transmembrane transporter activity+++GO:0044070///regulation of anion transport+++GO:0090314///positi…	cellular_component+++molecular_function+++biological_process	[Cellular Component]---membrane+++cell part+++cell+++membrane part+++[Molecular Function]---binding+++[Biological Process]---localization+++regulation of biological process+++positive regulation of biological process+++biological regulation
NM_001034612.2	HPX	mRNA	[Cellular Component]---GO:0005576///extracellular region+++GO:0005615///extracellular space+++GO:0005623///cell+++[Molecular Function]---GO:0004222///metalloendopeptidase activity+++GO:0008270///zinc ion binding+++GO:0015232///heme transporter activity+++GO:0046872///metal ion binding+++[Biological Process]---GO:0002639///positive regulation of immunoglobulin production+++GO:0002925///positive re…	cellular_component+++molecular_function+++biological_process	[Cellular Component]---extracellular region+++extracellular region part+++cell+++[Molecular Function]---catalytic activity+++binding+++transporter activity+++[Biological Process]---regulation of biological process+++immune system process+++positive regulation of biological process+++biological regulation+++response to stimulus+++metabolic process+++cellular process+++localization+++signaling
NM_001034613.1	PMPCB	mRNA	[Cellular Component]---GO:0005739///mitochondrion+++GO:0005743///mitochondrial inner membrane+++GO:0005759///mitochondrial matrix+++GO:0017087///mitochondrial processing peptidase complex+++[Molecular Function]---GO:0003824///catalytic activity+++GO:0004175///endopeptidase activity+++GO:0004222///metalloendopeptidase activity+++GO:0008233///peptidase activity+++GO:0008237///metallopeptidase activ…	cellular_component+++molecular_function+++biological_process	[Cellular Component]---organelle+++cell part+++cell+++membrane+++organelle part+++membrane-enclosed lumen+++protein-containing complex+++[Molecular Function]---catalytic activity+++binding+++[Biological Process]---metabolic process+++localization+++cellular process+++cellular component organization or biogenesis
NM_001034614.2	BNIP3L	mRNA	[Cellular Component]---GO:0005634///nucleus+++GO:0005635///nuclear envelope+++GO:0005739///mitochondrion+++GO:0005740///mitochondrial envelope+++GO:0005741///mitochondrial outer membrane+++GO:0005783///endoplasmic reticulum+++GO:0016020///membrane+++GO:0016021///integral component of membrane+++[Biological Process]---GO:0006915///apoptotic process+++GO:0035694///mitochondrial protein catabolic pr…	cellular_component+++biological_process	[Cellular Component]---organelle+++cell part+++cell+++organelle part+++membrane+++membrane part+++[Biological Process]---cellular process+++metabolic process+++cellular component organization or biogenesis+++regulation of biological process+++positive regulation of biological process+++biological regulation+++immune system process+++response to stimulus+++multi-organism process+++signaling+++loca…
NM_001034616.1	TMEM183A	mRNA	[Cellular Component]---GO:0016020///membrane+++GO:0016021///integral component of membrane	cellular_component	[Cellular Component]---membrane+++membrane part
NM_001034619.1	ANKRD46	mRNA	[Cellular Component]---GO:0016020///membrane+++GO:0016021///integral component of membrane	cellular_component	[Cellular Component]---membrane+++membrane part
NM_001034620.2	CD200	mRNA	[Cellular Component]---GO:0016020///membrane+++GO:0016021///integral component of membrane+++[Biological Process]---GO:0043031///negative regulation of macrophage activation+++GO:0050776///regulation of immune response	cellular_component+++biological_process	[Cellular Component]---membrane+++membrane part+++[Biological Process]---regulation of biological process+++immune system process+++negative regulation of biological process+++cellular process+++biological regulation+++response to stimulus
NM_001034623.1	SYNGR1	mRNA	[Cellular Component]---GO:0016020///membrane+++GO:0016021///integral component of membrane+++GO:0030672///synaptic vesicle membrane+++GO:0031594///neuromuscular junction+++[Biological Process]---GO:0048169///regulation of long-term neuronal synaptic plasticity+++GO:0048172///regulation of short-term neuronal synaptic plasticity+++GO:1990830///cellular response to leukemia inhibitory factor	cellular_component+++biological_process	[Cellular Component]---membrane+++membrane part+++organelle+++cell part+++cell+++organelle part+++synapse+++synapse part+++[Biological Process]---regulation of biological process+++signaling+++cellular process+++biological regulation+++response to stimulus
NM_001034632.3	PIN1	mRNA	[Cellular Component]---GO:0005634///nucleus+++GO:0005654///nucleoplasm+++GO:0005737///cytoplasm+++GO:0005829///cytosol+++GO:0016607///nuclear speck+++GO:0030496///midbody+++GO:0098978///glutamatergic synapse+++GO:0099524///postsynaptic cytosol+++[Molecular Function]---GO:0003755///peptidyl-prolyl cis-trans isomerase activity+++GO:0008013///beta-catenin binding+++GO:0016853///isomerase activity+++…	cellular_component+++molecular_function+++biological_process	[Cellular Component]---organelle+++cell part+++cell+++membrane-enclosed lumen+++organelle part+++synapse+++synapse part+++[Molecular Function]---catalytic activity+++binding+++[Biological Process]---metabolic process+++cellular process+++response to stimulus+++regulation of biological process+++biological regulation+++positive regulation of biological process+++negative regulation of biological p…
NM_001034635.1	ACTN2	mRNA	[Cellular Component]---GO:0005737///cytoplasm+++GO:0005886///plasma membrane+++GO:0005925///focal adhesion+++GO:0030017///sarcomere+++GO:0030018///Z disc+++GO:0030175///filopodium+++[Molecular Function]---GO:0003779///actin binding+++GO:0005509///calcium ion binding+++GO:0005546///phosphatidylinositol-4,5-bisphosphate binding+++GO:0008092///cytoskeletal protein binding+++GO:0019904///protein doma…	cellular_component+++molecular_function+++biological_process	[Cellular Component]---cell part+++cell+++membrane+++cell junction+++organelle+++supramolecular complex+++organelle part+++[Molecular Function]---binding+++transcription regulator activity+++[Biological Process]---multicellular organismal process+++cellular process+++cellular component organization or biogenesis+++biological regulation+++regulation of biological process+++negative regulation of b…
NM_001034636.2	PAIP2	mRNA	[Cellular Component]---GO:0005737///cytoplasm+++[Molecular Function]---GO:0000900///translation repressor activity, mRNA regulatory element binding+++GO:0003729///mRNA binding+++GO:0030371///translation repressor activity+++[Biological Process]---GO:0006417///regulation of translation+++GO:0007283///spermatogenesis+++GO:0007613///memory+++GO:0017148///negative regulation of translation+++GO:00459…	cellular_component+++molecular_function+++biological_process	[Cellular Component]---cell part+++cell+++[Molecular Function]---binding+++translation regulator activity+++[Biological Process]---metabolic process+++regulation of biological process+++cellular process+++biological regulation+++reproduction+++reproductive process+++multicellular organismal process+++multi-organism process+++behavior+++negative regulation of biological process+++signaling+++posit…
NM_001034643.2	DEDD	mRNA	[Cellular Component]---GO:0005730///nucleolus+++GO:0005737///cytoplasm+++[Molecular Function]---GO:0003677///DNA binding+++[Biological Process]---GO:0006915///apoptotic process+++GO:0008625///extrinsic apoptotic signaling pathway via death domain receptors+++GO:0042177///negative regulation of protein catabolic process+++GO:0042981///regulation of apoptotic process+++GO:0046697///decidualization+…	cellular_component+++molecular_function+++biological_process	[Cellular Component]---membrane-enclosed lumen+++organelle+++cell part+++cell+++organelle part+++[Molecular Function]---binding+++[Biological Process]---cellular process+++regulation of biological process+++response to stimulus+++signaling+++biological regulation+++metabolic process+++negative regulation of biological process+++developmental process+++reproduction+++reproductive process+++multice…
NM_001034644.1	RALA	mRNA	[Cellular Component]---GO:0005886///plasma membrane+++GO:0005925///focal adhesion+++GO:0009986///cell surface+++GO:0016020///membrane+++GO:0030139///endocytic vesicle+++GO:0032154///cleavage furrow+++[Molecular Function]---GO:0000166///nucleotide binding+++GO:0003924///GTPase activity+++GO:0005525///GTP binding+++GO:0017022///myosin binding+++GO:0019003///GDP binding+++GO:0031625///ubiquitin prot…	cellular_component+++molecular_function+++biological_process	[Cellular Component]---membrane+++cell part+++cell+++cell junction+++organelle+++membrane part+++[Molecular Function]---binding+++catalytic activity+++[Biological Process]---developmental process+++multicellular organismal process+++regulation of biological process+++response to stimulus+++signaling+++cellular process+++biological regulation+++localization+++cellular component organization or bio…
NM_001034647.2	TNFSF13	mRNA	[Cellular Component]---GO:0005615///extracellular space+++GO:0005737///cytoplasm+++GO:0005886///plasma membrane+++GO:0016020///membrane+++GO:0016021///integral component of membrane+++[Molecular Function]---GO:0005102///signaling receptor binding+++GO:0005125///cytokine activity+++GO:0005164///tumor necrosis factor receptor binding+++[Biological Process]---GO:0006955///immune response+++GO:000716…	cellular_component+++molecular_function+++biological_process	[Cellular Component]---extracellular region part+++extracellular region+++cell part+++cell+++membrane+++membrane part+++[Molecular Function]---binding+++molecular function regulator+++[Biological Process]---immune system process+++response to stimulus+++regulation of biological process+++signaling+++cellular process+++biological regulation+++developmental process+++metabolic process+++multicellul…
NM_001034652.2	ZCCHC17	mRNA	[Molecular Function]---GO:0003676///nucleic acid binding+++GO:0008270///zinc ion binding	molecular_function	[Molecular Function]---binding
NM_001034653.1	PPP1CB	mRNA	[Cellular Component]---GO:0000784///nuclear chromosome, telomeric region+++GO:0005634///nucleus+++GO:0005654///nucleoplasm+++GO:0005730///nucleolus+++GO:0005737///cytoplasm+++GO:0005829///cytosol+++GO:0005886///plasma membrane+++GO:0072357///PTW/PP1 phosphatase complex+++[Molecular Function]---GO:0004721///phosphoprotein phosphatase activity+++GO:0004722///protein serine/threonine phosphatase act…	cellular_component+++molecular_function+++biological_process	[Cellular Component]---membrane-enclosed lumen+++organelle+++cell part+++cell+++organelle part+++membrane+++protein-containing complex+++[Molecular Function]---catalytic activity+++binding+++[Biological Process]---metabolic process+++cellular process+++biological adhesion+++regulation of biological process+++biological regulation+++rhythmic process+++multicellular organismal process+++response to…
NM_001034654.1	LSM14A	mRNA	[Cellular Component]---GO:0000932///P-body+++GO:0005737///cytoplasm+++GO:0005829///cytosol+++GO:0010494///cytoplasmic stress granule+++GO:0036464///cytoplasmic ribonucleoprotein granule+++GO:1990124///messenger ribonucleoprotein complex+++[Molecular Function]---GO:0003690///double-stranded DNA binding+++GO:0003725///double-stranded RNA binding+++GO:0003727///single-stranded RNA binding+++GO:00037…	cellular_component+++molecular_function+++biological_process	[Cellular Component]---organelle+++cell part+++protein-containing complex+++cell+++[Molecular Function]---binding+++[Biological Process]---metabolic process+++regulation of biological process+++cellular process+++biological regulation+++developmental process+++multicellular organismal process+++cellular component organization or biogenesis+++immune system process+++signaling+++response to stimulu…
NM_001034655.1	SIGMAR1	mRNA	[Cellular Component]---GO:0005634///nucleus+++GO:0005635///nuclear envelope+++GO:0005637///nuclear inner membrane+++GO:0005640///nuclear outer membrane+++GO:0005783///endoplasmic reticulum+++GO:0005789///endoplasmic reticulum membrane+++GO:0005811///lipid droplet+++GO:0005886///plasma membrane+++GO:0014069///postsynaptic density+++GO:0016020///membrane+++GO:0016021///integral component of membran…	cellular_component+++molecular_function+++biological_process	[Cellular Component]---organelle+++cell part+++cell+++organelle part+++membrane+++membrane part+++synapse+++synapse part+++cell junction+++[Molecular Function]---molecular transducer activity+++[Biological Process]---localization+++response to stimulus+++cellular process+++regulation of biological process+++biological regulation+++cellular component organization or biogenesis
NM_001034657.1	TSPAN2	mRNA	[Cellular Component]---GO:0005654///nucleoplasm+++GO:0005886///plasma membrane+++GO:0005887///integral component of plasma membrane+++GO:0016020///membrane+++GO:0016021///integral component of membrane+++GO:0043209///myelin sheath+++[Biological Process]---GO:0006954///inflammatory response+++GO:0014002///astrocyte development+++GO:0014005///microglia development+++GO:0042552///myelination+++GO:00…	cellular_component+++biological_process	[Cellular Component]---membrane-enclosed lumen+++organelle+++cell part+++cell+++organelle part+++membrane+++membrane part+++[Biological Process]---response to stimulus+++developmental process+++multicellular organismal process+++cellular process+++immune system process+++cellular component organization or biogenesis
NM_001034658.2	WDR89	mRNA	[Biological Process]---GO:0021591///ventricular system development+++GO:0022038///corpus callosum development	biological_process	[Biological Process]---developmental process+++multicellular organismal process
NM_001034659.2	LRATD1	mRNA	[Cellular Component]---GO:0005737///cytoplasm+++[Biological Process]---GO:0000902///cell morphogenesis+++GO:0048870///cell motility	cellular_component+++biological_process	[Cellular Component]---cell part+++cell+++[Biological Process]---developmental process+++cellular process+++cellular component organization or biogenesis+++locomotion+++localization
NM_001034661.2	TRAF6	mRNA	[Cellular Component]---GO:0005634///nucleus+++GO:0005737///cytoplasm+++GO:0005811///lipid droplet+++GO:0005829///cytosol+++GO:0005886///plasma membrane+++GO:0005938///cell cortex+++GO:0009898///cytoplasmic side of plasma membrane+++GO:0032991///protein-containing complex+++GO:0035631///CD40 receptor complex+++GO:0048471///perinuclear region of cytoplasm+++[Molecular Function]---GO:0004842///ubiqu…	cellular_component+++molecular_function+++biological_process	[Cellular Component]---organelle+++cell part+++cell+++membrane+++membrane part+++protein-containing complex+++[Molecular Function]---catalytic activity+++binding+++[Biological Process]---metabolic process+++regulation of biological process+++negative regulation of biological process+++cellular process+++biological regulation+++multicellular organismal process+++developmental process+++immune syst…
NM_001034662.2	PSMA2	mRNA	[Cellular Component]---GO:0000502///proteasome complex+++GO:0000932///P-body+++GO:0005634///nucleus+++GO:0005737///cytoplasm+++GO:0005839///proteasome core complex+++GO:0019773///proteasome core complex, alpha-subunit complex+++[Molecular Function]---GO:0004175///endopeptidase activity+++GO:0004298///threonine-type endopeptidase activity+++GO:0008233///peptidase activity+++GO:0016787///hydrolase …	cellular_component+++molecular_function+++biological_process	[Cellular Component]---cell part+++protein-containing complex+++cell+++organelle+++[Molecular Function]---catalytic activity+++[Biological Process]---metabolic process+++cellular process+++response to stimulus+++multi-organism process
NM_001034665.2	CALU	mRNA	[Cellular Component]---GO:0005576///extracellular region+++GO:0005783///endoplasmic reticulum+++GO:0005789///endoplasmic reticulum membrane+++GO:0005794///Golgi apparatus+++GO:0016020///membrane+++GO:0016529///sarcoplasmic reticulum+++GO:0033018///sarcoplasmic reticulum lumen+++GO:0042470///melanosome+++[Molecular Function]---GO:0005509///calcium ion binding+++GO:0046872///metal ion binding	cellular_component+++molecular_function	[Cellular Component]---extracellular region+++organelle+++cell part+++cell+++membrane+++membrane part+++organelle part+++membrane-enclosed lumen+++[Molecular Function]---binding
NM_001034667.1	CERS2	mRNA	[Cellular Component]---GO:0005634///nucleus+++GO:0005783///endoplasmic reticulum+++GO:0005789///endoplasmic reticulum membrane+++GO:0016020///membrane+++GO:0016021///integral component of membrane+++[Molecular Function]---GO:0003677///DNA binding+++GO:0016410///N-acyltransferase activity+++GO:0016740///transferase activity+++GO:0050291///sphingosine N-acyltransferase activity+++[Biological Proces…	cellular_component+++molecular_function+++biological_process	[Cellular Component]---organelle+++cell part+++cell+++membrane+++membrane part+++organelle part+++[Molecular Function]---binding+++catalytic activity+++[Biological Process]---metabolic process+++cellular process
NM_001034670.1	APH1A	mRNA	[Cellular Component]---GO:0005783///endoplasmic reticulum+++GO:0005794///Golgi apparatus+++GO:0005887///integral component of plasma membrane+++GO:0016020///membrane+++GO:0016021///integral component of membrane+++GO:0070765///gamma-secretase complex+++[Molecular Function]---GO:0004175///endopeptidase activity+++[Biological Process]---GO:0001656///metanephros development+++GO:0006509///membrane p…	cellular_component+++molecular_function+++biological_process	[Cellular Component]---organelle+++cell part+++cell+++membrane+++membrane part+++protein-containing complex+++[Molecular Function]---catalytic activity+++[Biological Process]---developmental process+++multicellular organismal process+++metabolic process+++regulation of biological process+++response to stimulus+++signaling+++cellular process+++biological regulation
NM_001034671.2	CALML4	mRNA	[Molecular Function]---GO:0005509///calcium ion binding+++GO:0030234///enzyme regulator activity+++[Biological Process]---GO:0000226///microtubule cytoskeleton organization+++GO:0019722///calcium-mediated signaling+++GO:0050790///regulation of catalytic activity	molecular_function+++biological_process	[Molecular Function]---binding+++molecular function regulator+++[Biological Process]---cellular process+++cellular component organization or biogenesis+++regulation of biological process+++response to stimulus+++signaling+++biological regulation
NM_001034672.2	TSPAN33	mRNA	[Cellular Component]---GO:0005737///cytoplasm+++GO:0005886///plasma membrane+++GO:0005887///integral component of plasma membrane+++GO:0005912///adherens junction+++GO:0009986///cell surface+++GO:0016020///membrane+++GO:0016021///integral component of membrane+++GO:0030054///cell junction+++GO:0046930///pore complex+++GO:0097197///tetraspanin-enriched microdomain+++[Molecular Function]---GO:00198…	cellular_component+++molecular_function+++biological_process	[Cellular Component]---cell part+++cell+++membrane+++membrane part+++cell junction+++protein-containing complex+++[Molecular Function]---binding+++[Biological Process]---cellular process+++cellular component organization or biogenesis+++metabolic process+++localization
NM_001034675.1	TMUB1	mRNA	[Cellular Component]---GO:0005634///nucleus+++GO:0005654///nucleoplasm+++GO:0005730///nucleolus+++GO:0005737///cytoplasm+++GO:0005768///endosome+++GO:0005815///microtubule organizing center+++GO:0005829///cytosol+++GO:0005856///cytoskeleton+++GO:0005886///plasma membrane+++GO:0016020///membrane+++GO:0016021///integral component of membrane+++GO:0030054///cell junction+++GO:0045202///synapse+++GO:…	cellular_component+++biological_process	[Cellular Component]---organelle+++cell part+++cell+++membrane-enclosed lumen+++organelle part+++membrane+++membrane part+++cell junction+++synapse+++synapse part+++[Biological Process]---metabolic process+++response to stimulus+++cellular process
NM_001034677.1	GNAI3	mRNA	[Cellular Component]---GO:0000139///Golgi membrane+++GO:0005737///cytoplasm+++GO:0005789///endoplasmic reticulum membrane+++GO:0005794///Golgi apparatus+++GO:0005813///centrosome+++GO:0005834///heterotrimeric G-protein complex+++GO:0005886///plasma membrane+++GO:0030496///midbody+++[Molecular Function]---GO:0000166///nucleotide binding+++GO:0001664///G protein-coupled receptor binding+++GO:000392…	cellular_component+++molecular_function+++biological_process	[Cellular Component]---membrane+++organelle+++cell part+++cell+++organelle part+++membrane part+++protein-containing complex+++[Molecular Function]---binding+++catalytic activity+++[Biological Process]---regulation of biological process+++response to stimulus+++signaling+++cellular process+++biological regulation+++metabolic process+++positive regulation of biological process
NM_001034678.1	HES1	mRNA	[Cellular Component]---GO:0005634///nucleus+++GO:0005654///nucleoplasm+++GO:0005737///cytoplasm+++GO:0032991///protein-containing complex+++[Molecular Function]---GO:0000977///RNA polymerase II regulatory region sequence-specific DNA binding+++GO:0000981///DNA-binding transcription factor activity, RNA polymerase II-specific+++GO:0001217///bacterial-type RNA polymerase transcriptional repressor a…	cellular_component+++molecular_function+++biological_process	[Cellular Component]---organelle+++cell part+++cell+++membrane-enclosed lumen+++organelle part+++protein-containing complex+++[Molecular Function]---binding+++transcription regulator activity+++[Biological Process]---metabolic process+++regulation of biological process+++negative regulation of biological process+++cellular process+++biological regulation+++developmental process+++multicellular or…
NM_001034679.1	RCAN1	mRNA	[Cellular Component]---GO:0005634///nucleus+++GO:0005737///cytoplasm+++[Molecular Function]---GO:0003676///nucleic acid binding+++GO:0008597///calcium-dependent protein serine/threonine phosphatase regulator activity+++[Biological Process]---GO:0002931///response to ischemia+++GO:0006979///response to oxidative stress+++GO:0007614///short-term memory+++GO:0019722///calcium-mediated signaling+++GO…	cellular_component+++molecular_function+++biological_process	[Cellular Component]---organelle+++cell part+++cell+++[Molecular Function]---binding+++molecular function regulator+++[Biological Process]---response to stimulus+++behavior+++multicellular organismal process+++regulation of biological process+++signaling+++cellular process+++biological regulation+++locomotion+++metabolic process+++developmental process+++negative regulation of biological process
NM_001034680.2	ASNSD1	mRNA	[Molecular Function]---GO:0004066///asparagine synthase (glutamine-hydrolyzing) activity+++[Biological Process]---GO:0006529///asparagine biosynthetic process+++GO:0006541///glutamine metabolic process+++GO:0008652///cellular amino acid biosynthetic process	molecular_function+++biological_process	[Molecular Function]---catalytic activity+++[Biological Process]---metabolic process+++cellular process
NM_001034685.2	DCAF15	mRNA	[Cellular Component]---GO:0080008///Cul4-RING E3 ubiquitin ligase complex+++[Molecular Function]---GO:0008144///drug binding+++GO:0046872///metal ion binding+++[Biological Process]---GO:0000209///protein polyubiquitination+++GO:0002376///immune system process+++GO:0016567///protein ubiquitination+++GO:0032814///regulation of natural killer cell activation	cellular_component+++molecular_function+++biological_process	[Cellular Component]---cell part+++protein-containing complex+++cell+++[Molecular Function]---binding+++[Biological Process]---metabolic process+++cellular process+++immune system process+++regulation of biological process+++biological regulation
NM_001034686.2	GDE1	mRNA	[Cellular Component]---GO:0005886///plasma membrane+++GO:0016020///membrane+++GO:0016021///integral component of membrane+++GO:0030659///cytoplasmic vesicle membrane+++GO:0031410///cytoplasmic vesicle+++[Molecular Function]---GO:0004622///lysophospholipase activity+++GO:0008081///phosphoric diester hydrolase activity+++GO:0016787///hydrolase activity+++GO:0046872///metal ion binding+++GO:0047395/…	cellular_component+++molecular_function+++biological_process	[Cellular Component]---membrane+++cell part+++cell+++membrane part+++organelle+++organelle part+++[Molecular Function]---catalytic activity+++binding+++[Biological Process]---metabolic process+++cellular process
NM_001034687.2	S100PBP	mRNA	[Cellular Component]---GO:0005634///nucleus+++GO:0005829///cytosol+++GO:0016607///nuclear speck+++[Molecular Function]---GO:0048306///calcium-dependent protein binding	cellular_component+++molecular_function	[Cellular Component]---organelle+++cell part+++cell+++membrane-enclosed lumen+++organelle part+++[Molecular Function]---binding
NM_001034688.2	LYPLA1	mRNA	[Cellular Component]---GO:0005634///nucleus+++GO:0005737///cytoplasm+++GO:0005783///endoplasmic reticulum+++GO:0005886///plasma membrane+++GO:0016020///membrane+++GO:0031965///nuclear membrane+++[Molecular Function]---GO:0004620///phospholipase activity+++GO:0004622///lysophospholipase activity+++GO:0008474///palmitoyl-(protein) hydrolase activity+++GO:0016787///hydrolase activity+++GO:0052689///…	cellular_component+++molecular_function+++biological_process	[Cellular Component]---organelle+++cell part+++cell+++membrane+++organelle part+++[Molecular Function]---catalytic activity+++[Biological Process]---metabolic process+++cellular process
NM_001034690.2	RPS23	mRNA	[Cellular Component]---GO:0005737///cytoplasm+++GO:0005783///endoplasmic reticulum+++GO:0005791///rough endoplasmic reticulum+++GO:0005829///cytosol+++GO:0005840///ribosome+++GO:0015935///small ribosomal subunit+++GO:0022627///cytosolic small ribosomal subunit+++GO:0042788///polysomal ribosome+++[Molecular Function]---GO:0003735///structural constituent of ribosome+++[Biological Process]---GO:000…	cellular_component+++molecular_function+++biological_process	[Cellular Component]---cell part+++cell+++organelle+++protein-containing complex+++organelle part+++[Molecular Function]---structural molecule activity+++[Biological Process]---metabolic process+++cellular process
NM_001034691.1	DRG1	mRNA	[Cellular Component]---GO:0005634///nucleus+++GO:0005737///cytoplasm+++[Molecular Function]---GO:0000166///nucleotide binding+++GO:0005525///GTP binding+++GO:0008017///microtubule binding+++GO:0016787///hydrolase activity+++GO:0046872///metal ion binding+++[Biological Process]---GO:0002181///cytoplasmic translation+++GO:0031116///positive regulation of microtubule polymerization+++GO:1901673///re…	cellular_component+++molecular_function+++biological_process	[Cellular Component]---organelle+++cell part+++cell+++[Molecular Function]---binding+++catalytic activity+++[Biological Process]---metabolic process+++cellular process+++regulation of biological process+++positive regulation of biological process+++cellular component organization or biogenesis+++biological regulation
NM_001034695.2	COX7A2L	mRNA	[Cellular Component]---GO:0005730///nucleolus+++GO:0005739///mitochondrion+++GO:0005743///mitochondrial inner membrane+++GO:0005746///mitochondrial respiratory chain+++GO:0016020///membrane+++[Molecular Function]---GO:0004129///cytochrome-c oxidase activity+++GO:0009055///electron transfer activity+++[Biological Process]---GO:0002082///regulation of oxidative phosphorylation+++GO:0022900///electr…	cellular_component+++molecular_function+++biological_process	[Cellular Component]---membrane-enclosed lumen+++organelle+++cell part+++cell+++organelle part+++membrane+++membrane part+++[Molecular Function]---catalytic activity+++transporter activity+++[Biological Process]---metabolic process+++regulation of biological process+++cellular process+++biological regulation+++cellular component organization or biogenesis+++localization
NM_001034696.1	HSD3B7	mRNA	[Cellular Component]---GO:0005811///lipid droplet+++[Molecular Function]---GO:0003854///3-beta-hydroxy-delta5-steroid dehydrogenase activity+++GO:0016491///oxidoreductase activity+++GO:0016616///oxidoreductase activity, acting on the CH-OH group of donors, NAD or NADP as acceptor+++GO:0016853///isomerase activity+++GO:0047016///cholest-5-ene-3-beta,7-alpha-diol 3-beta-dehydrogenase activity+++[Bi…	cellular_component+++molecular_function+++biological_process	[Cellular Component]---organelle+++cell part+++cell+++[Molecular Function]---catalytic activity+++[Biological Process]---metabolic process+++immune system process+++locomotion+++response to stimulus+++localization+++cellular process
NM_001034697.2	TUBB4A	mRNA	[Cellular Component]---GO:0005737///cytoplasm+++GO:0005829///cytosol+++GO:0005856///cytoskeleton+++GO:0005874///microtubule+++GO:0005929///cilium+++GO:0005930///axoneme+++GO:0033269///internode region of axon+++GO:0042995///cell projection+++GO:0043025///neuronal cell body+++GO:0043209///myelin sheath+++[Molecular Function]---GO:0000166///nucleotide binding+++GO:0003924///GTPase activity+++GO:000…	cellular_component+++molecular_function+++biological_process	[Cellular Component]---cell part+++cell+++organelle+++supramolecular complex+++organelle part+++[Molecular Function]---binding+++catalytic activity+++structural molecule activity+++[Biological Process]---cellular process+++cellular component organization or biogenesis+++regulation of biological process+++negative regulation of biological process+++biological regulation
NM_001034700.2	SRSF3	mRNA	[Cellular Component]---GO:0005634///nucleus+++GO:0005737///cytoplasm+++GO:0016607///nuclear speck+++[Molecular Function]---GO:0003676///nucleic acid binding+++GO:0003723///RNA binding+++GO:0043274///phospholipase binding+++[Biological Process]---GO:0000381///regulation of alternative mRNA splicing, via spliceosome+++GO:0006397///mRNA processing+++GO:0006406///mRNA export from nucleus+++GO:0008380…	cellular_component+++molecular_function+++biological_process	[Cellular Component]---organelle+++cell part+++cell+++membrane-enclosed lumen+++organelle part+++[Molecular Function]---binding+++[Biological Process]---metabolic process+++regulation of biological process+++cellular process+++biological regulation+++localization+++response to stimulus
NM_001034701.1	DAZAP2	mRNA	[Cellular Component]---GO:0005634///nucleus+++GO:0005737///cytoplasm+++GO:0016607///nuclear speck+++GO:0032991///protein-containing complex+++[Molecular Function]---GO:0030971///receptor tyrosine kinase binding+++GO:0031435///mitogen-activated protein kinase kinase kinase binding+++GO:0042802///identical protein binding+++GO:0043539///protein serine/threonine kinase activator activity+++GO:005069…	cellular_component+++molecular_function+++biological_process	[Cellular Component]---organelle+++cell part+++cell+++membrane-enclosed lumen+++organelle part+++protein-containing complex+++[Molecular Function]---binding+++molecular function regulator+++[Biological Process]---metabolic process+++regulation of biological process+++positive regulation of biological process+++cellular process+++biological regulation
NM_001034703.2	ELOVL1	mRNA	[Cellular Component]---GO:0005634///nucleus+++GO:0005783///endoplasmic reticulum+++GO:0005789///endoplasmic reticulum membrane+++GO:0016020///membrane+++GO:0016021///integral component of membrane+++GO:0016592///mediator complex+++GO:0030176///integral component of endoplasmic reticulum membrane+++[Molecular Function]---GO:0003712///transcription coregulator activity+++GO:0009922///fatty acid elo…	cellular_component+++molecular_function+++biological_process	[Cellular Component]---organelle+++cell part+++cell+++membrane+++membrane part+++organelle part+++membrane-enclosed lumen+++protein-containing complex+++[Molecular Function]---transcription regulator activity+++catalytic activity+++[Biological Process]---metabolic process+++regulation of biological process+++cellular process+++biological regulation
NM_001034704.1	DDAH2	mRNA	[Cellular Component]---GO:0005737///cytoplasm+++GO:0005739///mitochondrion+++GO:0005829///cytosol+++GO:0034451///centriolar satellite+++[Molecular Function]---GO:0016403///dimethylargininase activity+++GO:0016597///amino acid binding+++GO:0016787///hydrolase activity+++GO:0016813///hydrolase activity, acting on carbon-nitrogen (but not peptide) bonds, in linear amidines+++[Biological Process]---G…	cellular_component+++molecular_function+++biological_process	[Cellular Component]---cell part+++cell+++organelle+++organelle part+++[Molecular Function]---catalytic activity+++binding+++[Biological Process]---metabolic process+++cellular process+++regulation of biological process+++positive regulation of biological process+++biological regulation
NM_001034706.2	ATG9A	mRNA	[Cellular Component]---GO:0000407///phagophore assembly site+++GO:0000421///autophagosome membrane+++GO:0005768///endosome+++GO:0005776///autophagosome+++GO:0005794///Golgi apparatus+++GO:0016020///membrane+++GO:0016021///integral component of membrane+++GO:0031410///cytoplasmic vesicle+++GO:0031902///late endosome membrane+++[Biological Process]---GO:0000045///autophagosome assembly+++GO:0000422…	cellular_component+++biological_process	[Cellular Component]---cell part+++cell+++membrane+++organelle+++organelle part+++membrane part+++[Biological Process]---metabolic process+++cellular process+++cellular component organization or biogenesis+++localization
NM_001034707.2	RGS5	mRNA	[Cellular Component]---GO:0005737///cytoplasm+++GO:0016020///membrane+++[Biological Process]---GO:0009968///negative regulation of signal transduction	cellular_component+++biological_process	[Cellular Component]---cell part+++cell+++membrane+++[Biological Process]---regulation of biological process+++negative regulation of biological process+++response to stimulus+++signaling+++cellular process+++biological regulation
NM_001034708.2	NR1H4	mRNA	[Cellular Component]---GO:0005634///nucleus+++GO:0005719///nuclear euchromatin+++GO:0042025///host cell nucleus+++GO:0043235///receptor complex+++GO:0090575///RNA polymerase II transcription factor complex+++[Molecular Function]---GO:0000976///transcription regulatory region sequence-specific DNA binding+++GO:0000977///RNA polymerase II regulatory region sequence-specific DNA binding+++GO:0000978…	cellular_component+++molecular_function+++biological_process	[Cellular Component]---organelle+++cell part+++cell+++membrane-enclosed lumen+++organelle part+++other organism part+++other organism+++protein-containing complex+++[Molecular Function]---binding+++transcription regulator activity+++molecular transducer activity+++[Biological Process]---metabolic process+++regulation of biological process+++negative regulation of biological process+++cellular pro…
NM_001034710.3	CREM	mRNA	[Cellular Component]---GO:0005634///nucleus+++GO:0005667///transcription factor complex+++[Molecular Function]---GO:0000977///RNA polymerase II regulatory region sequence-specific DNA binding+++GO:0001227///DNA-binding transcription repressor activity, RNA polymerase II-specific+++GO:0003677///DNA binding+++GO:0003700///DNA-binding transcription factor activity+++[Biological Process]---GO:0000122…	cellular_component+++molecular_function+++biological_process	[Cellular Component]---organelle+++cell part+++cell+++protein-containing complex+++[Molecular Function]---binding+++transcription regulator activity+++[Biological Process]---metabolic process+++regulation of biological process+++negative regulation of biological process+++cellular process+++biological regulation+++reproduction+++reproductive process+++multicellular organismal process+++multi-orga…
NM_001034713.2	ARPC2	mRNA	[Cellular Component]---GO:0005634///nucleus+++GO:0005737///cytoplasm+++GO:0005829///cytosol+++GO:0005856///cytoskeleton+++GO:0005885///Arp2/3 protein complex+++GO:0015629///actin cytoskeleton+++GO:0030054///cell junction+++GO:0035861///site of double-strand break+++GO:0042995///cell projection+++GO:0043005///neuron projection+++GO:0045202///synapse+++[Molecular Function]---GO:0003779///actin bind…	cellular_component+++molecular_function+++biological_process	[Cellular Component]---organelle+++cell part+++cell+++protein-containing complex+++organelle part+++cell junction+++synapse+++[Molecular Function]---binding+++structural molecule activity+++[Biological Process]---cellular process+++cellular component organization or biogenesis+++regulation of biological process+++biological regulation+++positive regulation of biological process
NM_001034718.2	GLE1	mRNA	[Cellular Component]---GO:0005634///nucleus+++GO:0005635///nuclear envelope+++GO:0005643///nuclear pore+++GO:0005730///nucleolus+++GO:0005737///cytoplasm+++GO:0005813///centrosome+++GO:0005814///centriole+++GO:0005829///cytosol+++GO:0031965///nuclear membrane+++GO:0036064///ciliary basal body+++GO:0044614///nuclear pore cytoplasmic filaments+++[Molecular Function]---GO:0000822///inositol hexakisp…	cellular_component+++molecular_function+++biological_process	[Cellular Component]---organelle+++cell part+++cell+++organelle part+++protein-containing complex+++membrane-enclosed lumen+++membrane+++[Molecular Function]---binding+++[Biological Process]---metabolic process+++localization+++regulation of biological process+++cellular process+++biological regulation+++cellular component organization or biogenesis
NM_001034722.2	BTG3	mRNA	[Cellular Component]---GO:0005634///nucleus+++GO:0005737///cytoplasm+++[Biological Process]---GO:0008285///negative regulation of cell proliferation+++GO:0045930///negative regulation of mitotic cell cycle	cellular_component+++biological_process	[Cellular Component]---organelle+++cell part+++cell+++[Biological Process]---regulation of biological process+++cell proliferation+++negative regulation of biological process+++cellular process+++biological regulation
NM_001034725.2	DUSP10	mRNA	[Cellular Component]---GO:0005634///nucleus+++GO:0005654///nucleoplasm+++GO:0005737///cytoplasm+++GO:0005794///Golgi apparatus+++GO:0005829///cytosol+++GO:0016607///nuclear speck+++[Molecular Function]---GO:0004721///phosphoprotein phosphatase activity+++GO:0004725///protein tyrosine phosphatase activity+++GO:0008138///protein tyrosine/serine/threonine phosphatase activity+++GO:0008330///protein …	cellular_component+++molecular_function+++biological_process	[Cellular Component]---organelle+++cell part+++cell+++membrane-enclosed lumen+++organelle part+++[Molecular Function]---catalytic activity+++binding+++[Biological Process]---metabolic process+++regulation of biological process+++negative regulation of biological process+++response to stimulus+++signaling+++cellular process+++biological regulation+++immune system process+++locomotion+++localizatio…
NM_001034727.3	XBP1	mRNA	[Cellular Component]---GO:0005623///cell+++GO:0005634///nucleus+++GO:0005737///cytoplasm+++GO:0005783///endoplasmic reticulum+++GO:0005789///endoplasmic reticulum membrane+++GO:0016020///membrane+++GO:0016021///integral component of membrane+++GO:0030176///integral component of endoplasmic reticulum membrane+++[Molecular Function]---GO:0000977///RNA polymerase II regulatory region sequence-specif…	cellular_component+++molecular_function+++biological_process	[Cellular Component]---cell+++organelle+++cell part+++membrane+++membrane part+++organelle part+++[Molecular Function]---binding+++transcription regulator activity+++[Biological Process]---developmental process+++multicellular organismal process+++cell proliferation+++regulation of biological process+++immune system process+++positive regulation of biological process+++biological regulation+++met…
NM_001034733.2	SH2D1A	mRNA	[Cellular Component]---GO:0005737///cytoplasm+++[Molecular Function]---GO:0005070///SH3/SH2 adaptor activity+++[Biological Process]---GO:0002250///adaptive immune response+++GO:0002376///immune system process+++GO:0006959///humoral immune response+++GO:0006968///cellular defense response+++GO:0007267///cell-cell signaling+++GO:0009967///positive regulation of signal transduction+++GO:0045087///in…	cellular_component+++molecular_function+++biological_process	[Cellular Component]---cell part+++cell+++[Molecular Function]---binding+++[Biological Process]---immune system process+++response to stimulus+++signaling+++cellular process+++regulation of biological process+++positive regulation of biological process+++biological regulation+++cell killing
NM_001034737.1	ARPC5L	mRNA	[Cellular Component]---GO:0005737///cytoplasm+++GO:0005856///cytoskeleton+++GO:0005885///Arp2/3 protein complex+++GO:0015629///actin cytoskeleton+++GO:0042995///cell projection+++GO:0045202///synapse+++GO:0098978///glutamatergic synapse+++[Molecular Function]---GO:0003779///actin binding+++GO:0051015///actin filament binding+++[Biological Process]---GO:0016477///cell migration+++GO:0030833///regu…	cellular_component+++molecular_function+++biological_process	[Cellular Component]---cell part+++cell+++organelle+++protein-containing complex+++organelle part+++synapse+++[Molecular Function]---binding+++[Biological Process]---locomotion+++localization+++cellular process+++regulation of biological process+++biological regulation+++cellular component organization or biogenesis+++positive regulation of biological process
NM_001034741.1	LEPROT	mRNA	[Cellular Component]---GO:0000139///Golgi membrane+++GO:0005768///endosome+++GO:0005794///Golgi apparatus+++GO:0010008///endosome membrane+++GO:0016020///membrane+++GO:0016021///integral component of membrane+++[Molecular Function]---GO:0005102///signaling receptor binding+++[Biological Process]---GO:0032511///late endosome to vacuole transport via multivesicular body sorting pathway+++GO:0046426…	cellular_component+++molecular_function+++biological_process	[Cellular Component]---membrane+++organelle+++cell part+++cell+++organelle part+++membrane part+++[Molecular Function]---binding+++[Biological Process]---localization+++regulation of biological process+++negative regulation of biological process+++response to stimulus+++signaling+++cellular process+++biological regulation
NM_001034744.2	TMEM37	mRNA	[Cellular Component]---GO:0016020///membrane+++GO:0016021///integral component of membrane+++[Molecular Function]---GO:0005244///voltage-gated ion channel activity+++GO:0005262///calcium channel activity+++[Biological Process]---GO:0034220///ion transmembrane transport+++GO:0070588///calcium ion transmembrane transport	cellular_component+++molecular_function+++biological_process	[Cellular Component]---membrane+++membrane part+++[Molecular Function]---transporter activity+++[Biological Process]---localization
NM_001034749.1	SPTLC1	mRNA	[Cellular Component]---GO:0005783///endoplasmic reticulum+++GO:0005789///endoplasmic reticulum membrane+++GO:0016020///membrane+++GO:0016021///integral component of membrane+++GO:0017059///serine C-palmitoyltransferase complex+++GO:0035339///SPOTS complex+++[Molecular Function]---GO:0003824///catalytic activity+++GO:0004758///serine C-palmitoyltransferase activity+++GO:0016740///transferase activ…	cellular_component+++molecular_function+++biological_process	[Cellular Component]---organelle+++cell part+++cell+++membrane+++membrane part+++organelle part+++protein-containing complex+++[Molecular Function]---catalytic activity+++binding+++[Biological Process]---metabolic process+++cellular process+++regulation of biological process+++positive regulation of biological process+++biological regulation
NM_001034751.1	LMO4	mRNA	[Cellular Component]---GO:0031252///cell leading edge+++[Molecular Function]---GO:0046872///metal ion binding+++[Biological Process]---GO:0001843///neural tube closure+++GO:0030334///regulation of cell migration+++GO:0033674///positive regulation of kinase activity	cellular_component+++molecular_function+++biological_process	[Cellular Component]---cell part+++cell+++[Molecular Function]---binding+++[Biological Process]---developmental process+++multicellular organismal process+++regulation of biological process+++locomotion+++localization+++cellular process+++biological regulation+++metabolic process+++positive regulation of biological process
NM_001034754.1	TAF12	mRNA	[Cellular Component]---GO:0000124///SAGA complex+++GO:0005634///nucleus+++GO:0005669///transcription factor TFIID complex+++GO:0030914///STAGA complex+++GO:0033276///transcription factor TFTC complex+++GO:0046695///SLIK (SAGA-like) complex+++[Molecular Function]---GO:0003677///DNA binding+++GO:0003713///transcription coactivator activity+++GO:0004402///histone acetyltransferase activity+++GO:0008…	cellular_component+++molecular_function+++biological_process	[Cellular Component]---membrane-enclosed lumen+++organelle+++cell part+++protein-containing complex+++cell+++organelle part+++[Molecular Function]---binding+++transcription regulator activity+++catalytic activity+++[Biological Process]---metabolic process+++cellular process+++cellular component organization or biogenesis+++regulation of biological process+++positive regulation of biological proce…
NM_001034761.1	DAD1	mRNA	[Cellular Component]---GO:0005783///endoplasmic reticulum+++GO:0005789///endoplasmic reticulum membrane+++GO:0008250///oligosaccharyltransferase complex+++GO:0016020///membrane+++GO:0016021///integral component of membrane+++[Molecular Function]---GO:0004576///oligosaccharyl transferase activity+++GO:0004579///dolichyl-diphosphooligosaccharide-protein glycotransferase activity+++GO:0008047///enzy…	cellular_component+++molecular_function+++biological_process	[Cellular Component]---organelle+++cell part+++cell+++membrane+++membrane part+++organelle part+++protein-containing complex+++[Molecular Function]---catalytic activity+++molecular function regulator+++[Biological Process]---developmental process+++multicellular organismal process+++metabolic process+++cellular process+++biological regulation+++regulation of biological process+++negative regulati…
NM_001034765.1	THY1	mRNA	[Cellular Component]---GO:0005623///cell+++GO:0005783///endoplasmic reticulum+++GO:0005886///plasma membrane+++GO:0009897///external side of plasma membrane+++GO:0009986///cell surface+++GO:0016324///apical plasma membrane+++GO:0030425///dendrite+++GO:0030426///growth cone+++GO:0031362///anchored component of external side of plasma membrane+++GO:0045121///membrane raft+++[Molecular Function]---G…	cellular_component+++molecular_function+++biological_process	[Cellular Component]---cell+++organelle+++cell part+++membrane+++membrane part+++[Molecular Function]---molecular function regulator+++binding+++[Biological Process]---developmental process+++multicellular organismal process+++biological adhesion+++regulation of biological process+++biological regulation+++immune system process+++locomotion+++localization+++cellular process+++positive regulation …
NM_001034769.1	LAMTOR1	mRNA	[Cellular Component]---GO:0005764///lysosome+++GO:0005765///lysosomal membrane+++GO:0005768///endosome+++GO:0005886///plasma membrane+++GO:0016020///membrane+++GO:0031902///late endosome membrane+++GO:0045121///membrane raft+++GO:0071986///Ragulator complex+++[Molecular Function]---GO:0005085///guanyl-nucleotide exchange factor activity+++GO:0060090///molecular adaptor activity+++[Biological Proc…	cellular_component+++molecular_function+++biological_process	[Cellular Component]---organelle+++cell part+++cell+++membrane+++organelle part+++membrane part+++protein-containing complex+++[Molecular Function]---binding+++molecular function regulator+++[Biological Process]---regulation of biological process+++cellular process+++growth+++cellular component organization or biogenesis+++biological regulation+++metabolic process+++signaling+++localization+++res…
NM_001034770.1	POP4	mRNA	[Cellular Component]---GO:0000172///ribonuclease MRP complex+++GO:0005634///nucleus+++GO:0005730///nucleolus+++GO:0030677///ribonuclease P complex+++GO:0030681///multimeric ribonuclease P complex+++[Molecular Function]---GO:0000171///ribonuclease MRP activity+++GO:0003723///RNA binding+++GO:0004526///ribonuclease P activity+++GO:0004540///ribonuclease activity+++GO:0016787///hydrolase activity+++…	cellular_component+++molecular_function+++biological_process	[Cellular Component]---protein-containing complex+++organelle+++cell part+++cell+++membrane-enclosed lumen+++organelle part+++[Molecular Function]---catalytic activity+++binding+++[Biological Process]---metabolic process+++cellular process+++cellular component organization or biogenesis
NM_001034773.1	PPCDC	mRNA	[Molecular Function]---GO:0003824///catalytic activity+++GO:0004633///phosphopantothenoylcysteine decarboxylase activity+++GO:0042802///identical protein binding+++[Biological Process]---GO:0015937///coenzyme A biosynthetic process	molecular_function+++biological_process	[Molecular Function]---catalytic activity+++binding+++[Biological Process]---metabolic process+++cellular process
NM_001034776.2	TRA2B	mRNA	[Cellular Component]---GO:0005623///cell+++GO:0005634///nucleus+++GO:0005637///nuclear inner membrane+++GO:0005654///nucleoplasm+++GO:0005681///spliceosomal complex+++GO:0032991///protein-containing complex+++GO:1990904///ribonucleoprotein complex+++[Molecular Function]---GO:0003676///nucleic acid binding+++GO:0003723///RNA binding+++GO:0003729///mRNA binding+++GO:0019904///protein domain specifi…	cellular_component+++molecular_function+++biological_process	[Cellular Component]---cell+++organelle+++cell part+++membrane+++organelle part+++membrane-enclosed lumen+++protein-containing complex+++[Molecular Function]---binding+++[Biological Process]---metabolic process+++regulation of biological process+++cellular process+++biological regulation+++developmental process+++multicellular organismal process+++positive regulation of biological process+++respo…
NM_001034779.2	MAPKAPK3	mRNA	[Cellular Component]---GO:0005634///nucleus+++GO:0005654///nucleoplasm+++GO:0005737///cytoplasm+++[Molecular Function]---GO:0000166///nucleotide binding+++GO:0004672///protein kinase activity+++GO:0004674///protein serine/threonine kinase activity+++GO:0005516///calmodulin binding+++GO:0005524///ATP binding+++GO:0009931///calcium-dependent protein serine/threonine kinase activity+++GO:0016301///k…	cellular_component+++molecular_function+++biological_process	[Cellular Component]---organelle+++cell part+++cell+++membrane-enclosed lumen+++organelle part+++[Molecular Function]---binding+++catalytic activity+++[Biological Process]---regulation of biological process+++immune system process+++signaling+++response to stimulus+++cellular process+++positive regulation of biological process+++biological regulation+++metabolic process+++multi-organism process++…
NM_001034780.1	ADAT2	mRNA	[Cellular Component]---GO:0052718///tRNA-specific adenosine-34 deaminase complex+++[Molecular Function]---GO:0003824///catalytic activity+++GO:0008251///tRNA-specific adenosine deaminase activity+++GO:0008270///zinc ion binding+++GO:0016787///hydrolase activity+++GO:0046872///metal ion binding+++GO:0052717///tRNA-specific adenosine-34 deaminase activity+++[Biological Process]---GO:0002100///tRNA …	cellular_component+++molecular_function+++biological_process	[Cellular Component]---cell part+++protein-containing complex+++cell+++[Molecular Function]---catalytic activity+++binding+++[Biological Process]---metabolic process+++cellular process
NM_001034782.1	CENPL	mRNA	[Cellular Component]---GO:0000775///chromosome, centromeric region+++GO:0005634///nucleus+++GO:0005694///chromosome	cellular_component	[Cellular Component]---organelle+++cell part+++cell+++organelle part
NM_001034786.2	TMEM50B	mRNA	[Cellular Component]---GO:0000139///Golgi membrane+++GO:0005783///endoplasmic reticulum+++GO:0005789///endoplasmic reticulum membrane+++GO:0005794///Golgi apparatus+++GO:0016020///membrane+++GO:0016021///integral component of membrane+++[Biological Process]---GO:0032511///late endosome to vacuole transport via multivesicular body sorting pathway	cellular_component+++biological_process	[Cellular Component]---membrane+++organelle+++cell part+++cell+++organelle part+++membrane part+++[Biological Process]---localization
NM_001034791.1	LAMTOR2	mRNA	[Cellular Component]---GO:0005764///lysosome+++GO:0005765///lysosomal membrane+++GO:0005768///endosome+++GO:0005770///late endosome+++GO:0016020///membrane+++GO:0031902///late endosome membrane+++GO:0071986///Ragulator complex+++[Molecular Function]---GO:0005085///guanyl-nucleotide exchange factor activity+++GO:0060090///molecular adaptor activity+++[Biological Process]---GO:0000186///activation …	cellular_component+++molecular_function+++biological_process	[Cellular Component]---organelle+++cell part+++cell+++membrane+++organelle part+++membrane part+++protein-containing complex+++[Molecular Function]---binding+++molecular function regulator+++[Biological Process]---metabolic process+++regulation of biological process+++response to stimulus+++signaling+++positive regulation of biological process+++cellular process+++biological regulation+++growth++…
NM_001034795.1	GALM	mRNA	[Cellular Component]---GO:0005737///cytoplasm+++[Molecular Function]---GO:0003824///catalytic activity+++GO:0004034///aldose 1-epimerase activity+++GO:0016853///isomerase activity+++GO:0030246///carbohydrate binding+++[Biological Process]---GO:0005975///carbohydrate metabolic process+++GO:0006006///glucose metabolic process+++GO:0006012///galactose metabolic process+++GO:0019318///hexose metaboli…	cellular_component+++molecular_function+++biological_process	[Cellular Component]---cell part+++cell+++[Molecular Function]---catalytic activity+++binding+++[Biological Process]---metabolic process
NM_001034799.1	ERMN	mRNA	[Cellular Component]---GO:0005737///cytoplasm+++GO:0005856///cytoskeleton+++GO:0005938///cell cortex+++GO:0030175///filopodium+++GO:0033269///internode region of axon+++GO:0033270///paranode region of axon+++GO:0043025///neuronal cell body+++GO:0043209///myelin sheath+++[Molecular Function]---GO:0003779///actin binding+++GO:0051015///actin filament binding+++[Biological Process]---GO:0001763///mo…	cellular_component+++molecular_function+++biological_process	[Cellular Component]---cell part+++cell+++organelle+++[Molecular Function]---binding+++[Biological Process]---developmental process+++multicellular organismal process+++cellular process+++cellular component organization or biogenesis+++regulation of biological process+++biological regulation
NM_001034803.2	CRIPT	mRNA	[Cellular Component]---GO:0005737///cytoplasm+++GO:0014069///postsynaptic density+++GO:0030054///cell junction+++GO:0030425///dendrite+++GO:0042995///cell projection+++GO:0043025///neuronal cell body+++GO:0043197///dendritic spine+++GO:0043198///dendritic shaft+++GO:0045202///synapse+++[Molecular Function]---GO:0008017///microtubule binding+++GO:0030165///PDZ domain binding+++GO:0044877///protein…	cellular_component+++molecular_function+++biological_process	[Cellular Component]---cell part+++cell+++organelle+++synapse+++synapse part+++cell junction+++[Molecular Function]---binding+++[Biological Process]---cellular process+++cellular component organization or biogenesis+++localization+++regulation of biological process+++biological regulation
NM_001034811.1	AP5S1	mRNA	[Cellular Component]---GO:0005654///nucleoplasm+++GO:0005764///lysosome+++GO:0005770///late endosome+++GO:0005829///cytosol+++GO:0030119///AP-type membrane coat adaptor complex+++[Biological Process]---GO:0000724///double-strand break repair via homologous recombination+++GO:0016197///endosomal transport	cellular_component+++biological_process	[Cellular Component]---membrane-enclosed lumen+++organelle+++cell part+++cell+++organelle part+++membrane+++membrane part+++protein-containing complex+++[Biological Process]---metabolic process+++response to stimulus+++cellular process+++localization
NM_001034812.2	TMED9	mRNA	[Cellular Component]---GO:0000139///Golgi membrane+++GO:0005783///endoplasmic reticulum+++GO:0005789///endoplasmic reticulum membrane+++GO:0005793///endoplasmic reticulum-Golgi intermediate compartment+++GO:0005794///Golgi apparatus+++GO:0008021///synaptic vesicle+++GO:0016020///membrane+++GO:0016021///integral component of membrane+++GO:0030134///COPII-coated ER to Golgi transport vesicle+++GO:0…	cellular_component+++molecular_function+++biological_process	[Cellular Component]---membrane+++organelle+++cell part+++cell+++organelle part+++membrane part+++synapse+++synapse part+++[Molecular Function]---binding+++[Biological Process]---localization+++cellular process+++cellular component organization or biogenesis+++regulation of biological process+++positive regulation of biological process+++biological regulation
NM_001035008.2	RPL37A	mRNA	[Cellular Component]---GO:0005840///ribosome+++[Molecular Function]---GO:0003735///structural constituent of ribosome+++GO:0046872///metal ion binding+++[Biological Process]---GO:0006412///translation	cellular_component+++molecular_function+++biological_process	[Cellular Component]---organelle+++cell part+++protein-containing complex+++cell+++[Molecular Function]---structural molecule activity+++binding+++[Biological Process]---metabolic process+++cellular process
NM_001035013.2	MTRF1	mRNA	[Cellular Component]---GO:0005739///mitochondrion+++[Molecular Function]---GO:0003747///translation release factor activity+++GO:0016149///translation release factor activity, codon specific+++GO:0043022///ribosome binding+++[Biological Process]---GO:0006412///translation+++GO:0006415///translational termination+++GO:0070126///mitochondrial translational termination	cellular_component+++molecular_function+++biological_process	[Cellular Component]---organelle+++cell part+++cell+++[Molecular Function]---binding+++[Biological Process]---metabolic process+++cellular process+++cellular component organization or biogenesis
NM_001035015.1	TOM1	mRNA	[Cellular Component]---GO:0005737///cytoplasm+++GO:0005768///endosome+++GO:0005769///early endosome+++GO:0005829///cytosol+++GO:0016020///membrane+++[Molecular Function]---GO:0030276///clathrin binding+++[Biological Process]---GO:0006886///intracellular protein transport+++GO:0015031///protein transport	cellular_component+++molecular_function+++biological_process	[Cellular Component]---cell part+++cell+++organelle+++membrane+++[Molecular Function]---binding+++[Biological Process]---localization
NM_001035022.1	HDHD2	mRNA	[Molecular Function]---GO:0016791///phosphatase activity+++GO:0019899///enzyme binding+++GO:0046872///metal ion binding+++[Biological Process]---GO:0016311///dephosphorylation	molecular_function+++biological_process	[Molecular Function]---catalytic activity+++binding+++[Biological Process]---metabolic process+++cellular process
NM_001035028.2	EIF4B	mRNA	[Cellular Component]---GO:0005844///polysome+++[Molecular Function]---GO:0003676///nucleic acid binding+++GO:0003723///RNA binding+++GO:0003743///translation initiation factor activity+++GO:0033592///RNA strand annealing activity+++[Biological Process]---GO:0006413///translational initiation+++GO:0097010///eukaryotic translation initiation factor 4F complex assembly	cellular_component+++molecular_function+++biological_process	[Cellular Component]---protein-containing complex+++[Molecular Function]---binding+++[Biological Process]---metabolic process+++cellular process+++cellular component organization or biogenesis
NM_001035030.2	MTMR11	mRNA	[Cellular Component]---GO:0005737///cytoplasm+++[Molecular Function]---GO:0004438///phosphatidylinositol-3-phosphatase activity+++[Biological Process]---GO:0046856///phosphatidylinositol dephosphorylation	cellular_component+++molecular_function+++biological_process	[Cellular Component]---cell part+++cell+++[Molecular Function]---catalytic activity+++[Biological Process]---metabolic process+++cellular process
NM_001035032.2	ERP44	mRNA	[Cellular Component]---GO:0005623///cell+++GO:0005783///endoplasmic reticulum+++GO:0005788///endoplasmic reticulum lumen+++GO:0005789///endoplasmic reticulum membrane+++GO:0005793///endoplasmic reticulum-Golgi intermediate compartment+++GO:0009986///cell surface+++[Molecular Function]---GO:0003756///protein disulfide isomerase activity+++[Biological Process]---GO:0006457///protein folding+++GO:00…	cellular_component+++molecular_function+++biological_process	[Cellular Component]---cell+++organelle+++cell part+++membrane-enclosed lumen+++organelle part+++membrane+++membrane part+++[Molecular Function]---catalytic activity+++[Biological Process]---cellular process+++response to stimulus+++metabolic process+++regulation of biological process+++biological regulation
NM_001035033.2	OMA1	mRNA	[Cellular Component]---GO:0005739///mitochondrion+++GO:0005743///mitochondrial inner membrane+++GO:0016020///membrane+++GO:0016021///integral component of membrane+++GO:0031966///mitochondrial membrane+++[Molecular Function]---GO:0004222///metalloendopeptidase activity+++GO:0008233///peptidase activity+++GO:0008237///metallopeptidase activity+++GO:0016787///hydrolase activity+++GO:0046872///metal…	cellular_component+++molecular_function+++biological_process	[Cellular Component]---organelle+++cell part+++cell+++membrane+++organelle part+++membrane part+++[Molecular Function]---catalytic activity+++binding+++[Biological Process]---metabolic process+++response to stimulus+++multicellular organismal process+++cellular process+++cellular component organization or biogenesis+++developmental process+++regulation of biological process+++negative regulation …
NM_001035035.2	PDXP	mRNA	[Cellular Component]---GO:0005737///cytoplasm+++GO:0005829///cytosol+++GO:0005856///cytoskeleton+++GO:0005886///plasma membrane+++GO:0005911///cell-cell junction+++GO:0015629///actin cytoskeleton+++GO:0016020///membrane+++GO:0030027///lamellipodium+++GO:0030496///midbody+++GO:0031258///lamellipodium membrane+++GO:0032154///cleavage furrow+++GO:0032587///ruffle membrane+++GO:0042995///cell project…	cellular_component+++molecular_function+++biological_process	[Cellular Component]---cell part+++cell+++organelle+++membrane+++cell junction+++membrane part+++[Molecular Function]---binding+++catalytic activity+++[Biological Process]---metabolic process+++cellular process+++regulation of biological process+++cellular component organization or biogenesis+++biological regulation+++positive regulation of biological process+++response to stimulus
NM_001035039.2	FLAD1	mRNA	[Cellular Component]---GO:0005829///cytosol+++GO:0005886///plasma membrane+++[Molecular Function]---GO:0000166///nucleotide binding+++GO:0003824///catalytic activity+++GO:0003919///FMN adenylyltransferase activity+++GO:0005524///ATP binding+++GO:0016740///transferase activity+++GO:0016779///nucleotidyltransferase activity+++GO:0042802///identical protein binding+++[Biological Process]---GO:000674…	cellular_component+++molecular_function+++biological_process	[Cellular Component]---cell part+++cell+++membrane+++[Molecular Function]---binding+++catalytic activity+++[Biological Process]---metabolic process+++cellular process
NM_001035040.2	RAB19	mRNA	[Cellular Component]---GO:0005886///plasma membrane+++GO:0012505///endomembrane system+++GO:0016020///membrane+++[Molecular Function]---GO:0000166///nucleotide binding+++GO:0003924///GTPase activity+++GO:0005525///GTP binding+++[Biological Process]---GO:0006886///intracellular protein transport+++GO:0032482///Rab protein signal transduction	cellular_component+++molecular_function+++biological_process	[Cellular Component]---membrane+++cell part+++cell+++[Molecular Function]---binding+++catalytic activity+++[Biological Process]---localization+++regulation of biological process+++response to stimulus+++signaling+++cellular process+++biological regulation
NM_001035045.1	FSCN1	mRNA	[Cellular Component]---GO:0001725///stress fiber+++GO:0001726///ruffle+++GO:0002102///podosome+++GO:0005737///cytoplasm+++GO:0005829///cytosol+++GO:0005856///cytoskeleton+++GO:0005902///microvillus+++GO:0005911///cell-cell junction+++GO:0015629///actin cytoskeleton+++GO:0030027///lamellipodium+++GO:0030175///filopodium+++GO:0030426///growth cone+++GO:0031253///cell projection membrane+++GO:004439…	cellular_component+++molecular_function+++biological_process	[Cellular Component]---organelle+++cell part+++cell+++organelle part+++protein-containing complex+++cell junction+++membrane+++membrane part+++[Molecular Function]---binding+++[Biological Process]---cellular process+++cellular component organization or biogenesis+++regulation of biological process+++positive regulation of biological process+++biological regulation+++locomotion+++localization
NM_001035047.1	YKT6	mRNA	[Cellular Component]---GO:0000139///Golgi membrane+++GO:0005623///cell+++GO:0005737///cytoplasm+++GO:0005739///mitochondrion+++GO:0005768///endosome+++GO:0005783///endoplasmic reticulum+++GO:0005794///Golgi apparatus+++GO:0005829///cytosol+++GO:0005887///integral component of plasma membrane+++GO:0016020///membrane+++GO:0016021///integral component of membrane+++GO:0030659///cytoplasmic vesicle m…	cellular_component+++molecular_function+++biological_process	[Cellular Component]---membrane+++organelle+++cell part+++cell+++organelle part+++membrane part+++[Molecular Function]---binding+++catalytic activity+++[Biological Process]---localization+++cellular process+++cellular component organization or biogenesis
NM_001035051.3	CHMP3	mRNA	[Cellular Component]---GO:0000815///ESCRT III complex+++GO:0005737///cytoplasm+++GO:0005768///endosome+++GO:0005771///multivesicular body+++GO:0005829///cytosol+++GO:0016020///membrane+++GO:0031902///late endosome membrane+++[Biological Process]---GO:0007034///vacuolar transport+++GO:0015031///protein transport+++GO:0032509///endosome transport via multivesicular body sorting pathway+++GO:0045324…	cellular_component+++biological_process	[Cellular Component]---membrane+++organelle+++membrane part+++cell part+++protein-containing complex+++cell+++organelle part+++[Biological Process]---localization
NM_001035055.2	CLDN11	mRNA	[Cellular Component]---GO:0005886///plasma membrane+++GO:0005923///bicellular tight junction+++GO:0016020///membrane+++GO:0016021///integral component of membrane+++GO:0030054///cell junction+++GO:0045178///basal part of cell+++GO:0070160///tight junction+++[Molecular Function]---GO:0005198///structural molecule activity+++[Biological Process]---GO:0007155///cell adhesion+++GO:0007283///spermatog…	cellular_component+++molecular_function+++biological_process	[Cellular Component]---membrane+++cell part+++cell+++cell junction+++membrane part+++[Molecular Function]---structural molecule activity+++[Biological Process]---biological adhesion+++reproduction+++reproductive process+++multicellular organismal process+++multi-organism process+++developmental process+++cellular process+++cellular component organization or biogenesis
NM_001035057.2	HCLS1	mRNA	[Cellular Component]---GO:0005634///nucleus+++GO:0005667///transcription factor complex+++GO:0005737///cytoplasm+++GO:0005829///cytosol+++GO:0005884///actin filament+++GO:0005886///plasma membrane+++GO:0014069///postsynaptic density+++GO:0030027///lamellipodium+++GO:0030425///dendrite+++GO:0030427///site of polarized growth+++GO:0030864///cortical actin cytoskeleton+++GO:0045211///postsynaptic me…	cellular_component+++molecular_function+++biological_process	[Cellular Component]---organelle+++cell part+++cell+++protein-containing complex+++supramolecular complex+++organelle part+++membrane+++synapse+++synapse part+++membrane part+++[Molecular Function]---binding+++[Biological Process]---metabolic process+++regulation of biological process+++negative regulation of biological process+++cellular process+++biological regulation+++cell proliferation+++pos…
NM_001035061.2	MLX	mRNA	[Cellular Component]---GO:0005634///nucleus+++GO:0005654///nucleoplasm+++GO:0005737///cytoplasm+++GO:0005829///cytosol+++GO:0031965///nuclear membrane+++[Molecular Function]---GO:0000977///RNA polymerase II regulatory region sequence-specific DNA binding+++GO:0001227///DNA-binding transcription repressor activity, RNA polymerase II-specific+++GO:0003677///DNA binding+++GO:0003700///DNA-binding tr…	cellular_component+++molecular_function+++biological_process	[Cellular Component]---organelle+++cell part+++cell+++membrane-enclosed lumen+++organelle part+++membrane+++[Molecular Function]---binding+++transcription regulator activity+++[Biological Process]---metabolic process+++regulation of biological process+++negative regulation of biological process+++cellular process+++biological regulation+++positive regulation of biological process
NM_001035063.1	IFNGR1	mRNA	[Cellular Component]---GO:0005886///plasma membrane+++GO:0016020///membrane+++GO:0016021///integral component of membrane+++[Molecular Function]---GO:0004896///cytokine receptor activity+++GO:0019955///cytokine binding+++[Biological Process]---GO:0019221///cytokine-mediated signaling pathway	cellular_component+++molecular_function+++biological_process	[Cellular Component]---membrane+++cell part+++cell+++membrane part+++[Molecular Function]---molecular transducer activity+++binding+++[Biological Process]---regulation of biological process+++response to stimulus+++signaling+++cellular process+++biological regulation
NM_001035071.1	HAO2	mRNA	[Cellular Component]---GO:0005777///peroxisome+++[Molecular Function]---GO:0003824///catalytic activity+++GO:0003973///(S)-2-hydroxy-acid oxidase activity+++GO:0004459///L-lactate dehydrogenase activity+++GO:0010181///FMN binding+++GO:0016491///oxidoreductase activity+++GO:0047730///carnosine synthase activity+++GO:0052852///very-long-chain-(S)-2-hydroxy-acid oxidase activity+++GO:0052853///long-…	cellular_component+++molecular_function+++biological_process	[Cellular Component]---organelle+++cell part+++cell+++[Molecular Function]---catalytic activity+++binding+++[Biological Process]---metabolic process+++cellular process
NM_001035072.2	CD96	mRNA	[Cellular Component]---GO:0005737///cytoplasm+++GO:0016020///membrane+++GO:0016021///integral component of membrane+++[Biological Process]---GO:0002534///cytokine production involved in inflammatory response+++GO:0002728///negative regulation of natural killer cell cytokine production+++GO:0006954///inflammatory response+++GO:0007155///cell adhesion+++GO:0007160///cell-matrix adhesion+++GO:003249…	cellular_component+++biological_process	[Cellular Component]---cell part+++cell+++membrane+++membrane part+++[Biological Process]---response to stimulus+++multicellular organismal process+++regulation of biological process+++immune system process+++negative regulation of biological process+++biological regulation+++biological adhesion+++multi-organism process
NM_001035073.1	WRAP53	mRNA	[Cellular Component]---GO:0000781///chromosome, telomeric region+++GO:0005634///nucleus+++GO:0005654///nucleoplasm+++GO:0005694///chromosome+++GO:0005697///telomerase holoenzyme complex+++GO:0005829///cytosol+++GO:0015030///Cajal body+++GO:0016604///nuclear body+++GO:0035861///site of double-strand break+++[Molecular Function]---GO:0003723///RNA binding+++GO:0031625///ubiquitin protein ligase bin…	cellular_component+++molecular_function+++biological_process	[Cellular Component]---organelle+++cell part+++cell+++organelle part+++membrane-enclosed lumen+++protein-containing complex+++[Molecular Function]---binding+++[Biological Process]---metabolic process+++response to stimulus+++cellular process+++biological regulation+++cellular component organization or biogenesis+++regulation of biological process+++positive regulation of biological process+++loca…
NM_001035076.2	TMEM59	mRNA	[Cellular Component]---GO:0000139///Golgi membrane+++GO:0005764///lysosome+++GO:0005765///lysosomal membrane+++GO:0005768///endosome+++GO:0005770///late endosome+++GO:0005794///Golgi apparatus+++GO:0005886///plasma membrane+++GO:0016020///membrane+++GO:0016021///integral component of membrane+++GO:0031902///late endosome membrane+++[Biological Process]---GO:0006914///autophagy+++GO:0010508///posi…	cellular_component+++biological_process	[Cellular Component]---membrane+++organelle+++cell part+++cell+++organelle part+++membrane part+++[Biological Process]---metabolic process+++cellular process+++regulation of biological process+++positive regulation of biological process+++biological regulation
NM_001035077.2	FASTK	mRNA	[Molecular Function]---GO:0004672///protein kinase activity+++GO:0004674///protein serine/threonine kinase activity+++GO:0016301///kinase activity+++[Biological Process]---GO:0006468///protein phosphorylation+++GO:0016310///phosphorylation+++GO:0043484///regulation of RNA splicing	molecular_function+++biological_process	[Molecular Function]---catalytic activity+++[Biological Process]---metabolic process+++cellular process+++regulation of biological process+++biological regulation
NM_001035079.2	PALMD	mRNA	[Cellular Component]---GO:0005737///cytoplasm+++GO:0016020///membrane+++GO:0030054///cell junction+++GO:0030425///dendrite+++GO:0042995///cell projection+++GO:0043197///dendritic spine+++GO:0045202///synapse+++[Biological Process]---GO:0008360///regulation of cell shape	cellular_component+++biological_process	[Cellular Component]---cell part+++cell+++membrane+++cell junction+++synapse+++synapse part+++[Biological Process]---developmental process+++regulation of biological process+++cellular process+++cellular component organization or biogenesis+++biological regulation
NM_001035080.2	MTF1	mRNA	[Cellular Component]---GO:0005634///nucleus+++GO:0005654///nucleoplasm+++GO:0005737///cytoplasm+++[Molecular Function]---GO:0000977///RNA polymerase II regulatory region sequence-specific DNA binding+++GO:0000978///RNA polymerase II proximal promoter sequence-specific DNA binding+++GO:0000981///DNA-binding transcription factor activity, RNA polymerase II-specific+++GO:0000987///proximal promoter …	cellular_component+++molecular_function+++biological_process	[Cellular Component]---organelle+++cell part+++cell+++membrane-enclosed lumen+++organelle part+++[Molecular Function]---binding+++transcription regulator activity+++[Biological Process]---metabolic process+++regulation of biological process+++negative regulation of biological process+++cellular process+++biological regulation+++response to stimulus+++developmental process+++multicellular organism…
NM_001035082.1	SUCLG1	mRNA	[Cellular Component]---GO:0005739///mitochondrion+++GO:0005829///cytosol+++GO:0005886///plasma membrane+++GO:0009361///succinate-CoA ligase complex (ADP-forming)+++[Molecular Function]---GO:0000166///nucleotide binding+++GO:0003824///catalytic activity+++GO:0004550///nucleoside diphosphate kinase activity+++GO:0004775///succinate-CoA ligase (ADP-forming) activity+++GO:0004776///succinate-CoA liga…	cellular_component+++molecular_function+++biological_process	[Cellular Component]---organelle+++cell part+++cell+++membrane+++protein-containing complex+++[Molecular Function]---binding+++catalytic activity+++[Biological Process]---metabolic process+++cellular process
NM_001035085.1	DARS1	mRNA	[Cellular Component]---GO:0005737///cytoplasm+++GO:0005829///cytosol+++GO:0017101///aminoacyl-tRNA synthetase multienzyme complex+++GO:0045202///synapse+++[Molecular Function]---GO:0000166///nucleotide binding+++GO:0003676///nucleic acid binding+++GO:0003723///RNA binding+++GO:0004812///aminoacyl-tRNA ligase activity+++GO:0004815///aspartate-tRNA ligase activity+++GO:0005524///ATP binding+++GO:00…	cellular_component+++molecular_function+++biological_process	[Cellular Component]---cell part+++cell+++protein-containing complex+++synapse+++[Molecular Function]---binding+++catalytic activity+++[Biological Process]---metabolic process+++cellular process
NM_001035088.2	DHRS11	mRNA	[Cellular Component]---GO:0005576///extracellular region+++[Molecular Function]---GO:0000166///nucleotide binding+++GO:0000253///3-keto sterol reductase activity+++GO:0004303///estradiol 17-beta-dehydrogenase activity+++GO:0016491///oxidoreductase activity+++GO:0072555///17-beta-ketosteroid reductase activity+++GO:0072582///17-beta-hydroxysteroid dehydrogenase (NADP+) activity+++[Biological Proce…	cellular_component+++molecular_function+++biological_process	[Cellular Component]---extracellular region+++[Molecular Function]---binding+++catalytic activity+++[Biological Process]---metabolic process+++cellular process+++biological regulation
NM_001035090.1	OXNAD1	mRNA	[Molecular Function]---GO:0016491///oxidoreductase activity+++[Biological Process]---GO:0055114///oxidation-reduction process	molecular_function+++biological_process	[Molecular Function]---catalytic activity+++[Biological Process]---metabolic process
NM_001035091.1	NTAQ1	mRNA	[Cellular Component]---GO:0005634///nucleus+++GO:0005737///cytoplasm+++GO:0005829///cytosol+++[Molecular Function]---GO:0008418///protein-N-terminal asparagine amidohydrolase activity+++GO:0016787///hydrolase activity+++GO:0016811///hydrolase activity, acting on carbon-nitrogen (but not peptide) bonds, in linear amides+++GO:0070773///protein-N-terminal glutamine amidohydrolase activity+++[Biologi…	cellular_component+++molecular_function+++biological_process	[Cellular Component]---organelle+++cell part+++cell+++[Molecular Function]---catalytic activity+++[Biological Process]---metabolic process+++cellular process
NM_001035095.2	PMM2	mRNA	[Cellular Component]---GO:0005737///cytoplasm+++GO:0005829///cytosol+++[Molecular Function]---GO:0004615///phosphomannomutase activity+++GO:0016853///isomerase activity+++[Biological Process]---GO:0006013///mannose metabolic process+++GO:0006487///protein N-linked glycosylation+++GO:0009298///GDP-mannose biosynthetic process+++GO:0045047///protein targeting to ER	cellular_component+++molecular_function+++biological_process	[Cellular Component]---cell part+++cell+++[Molecular Function]---catalytic activity+++[Biological Process]---metabolic process+++cellular process+++localization
NM_001035102.2	SLC39A5	mRNA	[Cellular Component]---GO:0005623///cell+++GO:0005887///integral component of plasma membrane+++GO:0016020///membrane+++GO:0016021///integral component of membrane+++GO:0016323///basolateral plasma membrane+++[Molecular Function]---GO:0005385///zinc ion transmembrane transporter activity+++GO:0046873///metal ion transmembrane transporter activity+++[Biological Process]---GO:0001654///eye developm…	cellular_component+++molecular_function+++biological_process	[Cellular Component]---cell+++membrane+++cell part+++membrane part+++[Molecular Function]---transporter activity+++[Biological Process]---developmental process+++multicellular organismal process+++cellular process+++biological regulation+++localization+++metabolic process+++regulation of biological process+++response to stimulus+++signaling+++positive regulation of biological process
NM_001035112.1	CDC42SE1	mRNA	[Cellular Component]---GO:0005737///cytoplasm+++GO:0005856///cytoskeleton+++GO:0005886///plasma membrane+++GO:0016020///membrane+++[Molecular Function]---GO:0017048///Rho GTPase binding+++[Biological Process]---GO:0006909///phagocytosis+++GO:0008360///regulation of cell shape+++GO:0035023///regulation of Rho protein signal transduction	cellular_component+++molecular_function+++biological_process	[Cellular Component]---cell part+++cell+++organelle+++membrane+++[Molecular Function]---binding+++[Biological Process]---localization+++developmental process+++regulation of biological process+++cellular process+++cellular component organization or biogenesis+++biological regulation+++response to stimulus+++signaling
NM_001035277.2	CDH13	mRNA	[Cellular Component]---GO:0005615///extracellular space+++GO:0005737///cytoplasm+++GO:0005886///plasma membrane+++GO:0005901///caveola+++GO:0005912///adherens junction+++GO:0009897///external side of plasma membrane+++GO:0009986///cell surface+++GO:0016020///membrane+++GO:0016342///catenin complex+++GO:0031225///anchored component of membrane+++GO:0043005///neuron projection+++[Molecular Function…	cellular_component+++molecular_function+++biological_process	[Cellular Component]---extracellular region part+++extracellular region+++cell part+++cell+++membrane+++membrane part+++cell junction+++protein-containing complex+++[Molecular Function]---binding+++[Biological Process]---developmental process+++cellular process+++cellular component organization or biogenesis+++regulation of biological process+++cell proliferation+++positive regulation of biologic…
NM_001035282.2	DGKD	mRNA	[Cellular Component]---GO:0005737///cytoplasm+++GO:0005829///cytosol+++GO:0005886///plasma membrane+++GO:0016020///membrane+++GO:0016021///integral component of membrane+++[Molecular Function]---GO:0000166///nucleotide binding+++GO:0003951///NAD+ kinase activity+++GO:0004143///diacylglycerol kinase activity+++GO:0005524///ATP binding+++GO:0016301///kinase activity+++GO:0016740///transferase activ…	cellular_component+++molecular_function+++biological_process	[Cellular Component]---cell part+++cell+++membrane+++membrane part+++[Molecular Function]---binding+++catalytic activity+++[Biological Process]---regulation of biological process+++response to stimulus+++signaling+++cellular process+++biological regulation+++metabolic process
NM_001035284.1	MPI	mRNA	[Cellular Component]---GO:0005737///cytoplasm+++GO:0005829///cytosol+++[Molecular Function]---GO:0004476///mannose-6-phosphate isomerase activity+++GO:0008270///zinc ion binding+++GO:0016853///isomerase activity+++GO:0046872///metal ion binding+++[Biological Process]---GO:0005975///carbohydrate metabolic process+++GO:0006486///protein glycosylation+++GO:0009298///GDP-mannose biosynthetic process+…	cellular_component+++molecular_function+++biological_process	[Cellular Component]---cell part+++cell+++[Molecular Function]---catalytic activity+++binding+++[Biological Process]---metabolic process+++cellular process
NM_001035285.1	SERINC2	mRNA	[Cellular Component]---GO:0016021///integral component of membrane+++[Biological Process]---GO:0006658///phosphatidylserine metabolic process+++GO:0006665///sphingolipid metabolic process	cellular_component+++biological_process	[Cellular Component]---membrane+++membrane part+++[Biological Process]---metabolic process+++cellular process
NM_001035291.1	COMMD7	mRNA	[Cellular Component]---GO:0031410///cytoplasmic vesicle+++[Molecular Function]---GO:0051059///NF-kappaB binding+++[Biological Process]---GO:0032088///negative regulation of NF-kappaB transcription factor activity+++GO:0033209///tumor necrosis factor-mediated signaling pathway+++GO:0045892///negative regulation of transcription, DNA-templated	cellular_component+++molecular_function+++biological_process	[Cellular Component]---organelle+++cell part+++cell+++[Molecular Function]---binding+++[Biological Process]---metabolic process+++regulation of biological process+++negative regulation of biological process+++cellular process+++biological regulation+++response to stimulus+++signaling
NM_001035294.1	SLA2	mRNA	[Cellular Component]---GO:0005654///nucleoplasm+++GO:0005770///late endosome+++GO:0005794///Golgi apparatus+++GO:0005886///plasma membrane+++GO:0005942///phosphatidylinositol 3-kinase complex+++GO:0031410///cytoplasmic vesicle+++GO:0043231///intracellular membrane-bounded organelle+++[Molecular Function]---GO:0005070///SH3/SH2 adaptor activity+++GO:0046935///1-phosphatidylinositol-3-kinase regula…	cellular_component+++molecular_function+++biological_process	[Cellular Component]---membrane-enclosed lumen+++organelle+++cell part+++cell+++organelle part+++membrane+++membrane part+++protein-containing complex+++[Molecular Function]---binding+++molecular function regulator+++[Biological Process]---metabolic process+++regulation of biological process+++negative regulation of biological process+++cellular process+++biological regulation+++response to stimu…
NM_001035296.2	EIF3L	mRNA	[Cellular Component]---GO:0001650///fibrillar center+++GO:0005654///nucleoplasm+++GO:0005730///nucleolus+++GO:0005737///cytoplasm+++GO:0005852///eukaryotic translation initiation factor 3 complex+++GO:0016282///eukaryotic 43S preinitiation complex+++GO:0033290///eukaryotic 48S preinitiation complex+++[Molecular Function]---GO:0003743///translation initiation factor activity+++[Biological Process]…	cellular_component+++molecular_function+++biological_process	[Cellular Component]---membrane-enclosed lumen+++organelle+++cell part+++cell+++organelle part+++protein-containing complex+++[Molecular Function]---binding+++[Biological Process]---metabolic process+++cellular process+++cellular component organization or biogenesis+++multi-organism process
NM_001035311.2	RNF186	mRNA	[Cellular Component]---GO:0005783///endoplasmic reticulum+++GO:0005789///endoplasmic reticulum membrane+++GO:0016020///membrane+++GO:0016021///integral component of membrane+++[Molecular Function]---GO:0004842///ubiquitin-protein transferase activity+++GO:0016740///transferase activity+++GO:0046872///metal ion binding+++GO:0061630///ubiquitin protein ligase activity+++[Biological Process]---GO:00…	cellular_component+++molecular_function+++biological_process	[Cellular Component]---organelle+++cell part+++cell+++membrane+++membrane part+++organelle part+++[Molecular Function]---catalytic activity+++binding+++[Biological Process]---metabolic process+++cellular process+++regulation of biological process+++signaling+++response to stimulus+++biological regulation+++localization
NM_001035324.2	RBM8A	mRNA	[Cellular Component]---GO:0005634///nucleus+++GO:0005681///spliceosomal complex+++GO:0005737///cytoplasm+++GO:0016607///nuclear speck+++GO:0035145///exon-exon junction complex+++GO:0071006///U2-type catalytic step 1 spliceosome+++[Molecular Function]---GO:0003676///nucleic acid binding+++GO:0003723///RNA binding+++GO:0003729///mRNA binding+++[Biological Process]---GO:0000184///nuclear-transcribed…	cellular_component+++molecular_function+++biological_process	[Cellular Component]---organelle+++cell part+++cell+++protein-containing complex+++organelle part+++membrane-enclosed lumen+++[Molecular Function]---binding+++[Biological Process]---metabolic process+++regulation of biological process+++negative regulation of biological process+++cellular process+++biological regulation+++localization
NM_001035326.1	CTSA	mRNA	[Cellular Component]---GO:0005764///lysosome+++GO:0043231///intracellular membrane-bounded organelle+++[Molecular Function]---GO:0004180///carboxypeptidase activity+++GO:0004185///serine-type carboxypeptidase activity+++GO:0008233///peptidase activity+++GO:0016787///hydrolase activity+++[Biological Process]---GO:0006508///proteolysis+++GO:0051603///proteolysis involved in cellular protein catabol…	cellular_component+++molecular_function+++biological_process	[Cellular Component]---organelle+++cell part+++cell+++[Molecular Function]---catalytic activity+++[Biological Process]---metabolic process+++cellular process
NM_001035329.2	KIFAP3	mRNA	[Cellular Component]---GO:0000794///condensed nuclear chromosome+++GO:0005783///endoplasmic reticulum+++GO:0005794///Golgi apparatus+++GO:0005813///centrosome+++GO:0005871///kinesin complex+++GO:0005876///spindle microtubule+++GO:0005930///axoneme+++GO:0015630///microtubule cytoskeleton+++GO:0016939///kinesin II complex+++GO:0032391///photoreceptor connecting cilium+++GO:0035869///ciliary transit…	cellular_component+++molecular_function+++biological_process	[Cellular Component]---membrane-enclosed lumen+++organelle+++cell part+++cell+++organelle part+++protein-containing complex+++supramolecular complex+++membrane+++membrane part+++[Molecular Function]---binding+++[Biological Process]---cellular process+++localization+++regulation of biological process+++cell proliferation+++negative regulation of biological process+++biological regulation+++cellula…
NM_001035330.2	GPA33	mRNA	[Cellular Component]---GO:0005886///plasma membrane+++GO:0005887///integral component of plasma membrane+++GO:0016020///membrane+++GO:0016021///integral component of membrane	cellular_component	[Cellular Component]---membrane+++cell part+++cell+++membrane part
NM_001035335.2	OXA1L	mRNA	[Cellular Component]---GO:0005739///mitochondrion+++GO:0005743///mitochondrial inner membrane+++GO:0016020///membrane+++GO:0016021///integral component of membrane+++GO:0031305///integral component of mitochondrial inner membrane+++GO:0031966///mitochondrial membrane+++[Molecular Function]---GO:0032977///membrane insertase activity+++GO:0042803///protein homodimerization activity+++GO:0097177///m…	cellular_component+++molecular_function+++biological_process	[Cellular Component]---organelle+++cell part+++cell+++membrane+++organelle part+++membrane part+++[Molecular Function]---transporter activity+++binding+++[Biological Process]---localization+++cellular process+++cellular component organization or biogenesis
NM_001035336.2	TNFRSF9	mRNA	[Cellular Component]---GO:0009897///external side of plasma membrane+++GO:0016020///membrane+++GO:0016021///integral component of membrane+++[Molecular Function]---GO:0019955///cytokine binding+++GO:0038023///signaling receptor activity+++[Biological Process]---GO:0006915///apoptotic process+++GO:0008285///negative regulation of cell proliferation+++GO:0042127///regulation of cell proliferation++…	cellular_component+++molecular_function+++biological_process	[Cellular Component]---membrane+++cell part+++membrane part+++cell+++[Molecular Function]---binding+++molecular transducer activity+++[Biological Process]---cellular process+++regulation of biological process+++cell proliferation+++negative regulation of biological process+++biological regulation+++localization+++multicellular organismal process
NM_001035340.2	ADPRS	mRNA	[Cellular Component]---GO:0005634///nucleus+++GO:0005654///nucleoplasm+++GO:0005694///chromosome+++GO:0005737///cytoplasm+++GO:0005739///mitochondrion+++GO:0005759///mitochondrial matrix+++GO:0016604///nuclear body+++GO:0090734///site of DNA damage+++[Molecular Function]---GO:0000287///magnesium ion binding+++GO:0004553///hydrolase activity, hydrolyzing O-glycosyl compounds+++GO:0004649///poly(AD…	cellular_component+++molecular_function+++biological_process	[Cellular Component]---organelle+++cell part+++cell+++membrane-enclosed lumen+++organelle part+++[Molecular Function]---binding+++catalytic activity+++[Biological Process]---metabolic process+++response to stimulus+++cellular process
NM_001035341.1	ZNF746	mRNA	[Cellular Component]---GO:0005634///nucleus+++GO:0005737///cytoplasm+++[Molecular Function]---GO:0000976///transcription regulatory region sequence-specific DNA binding+++GO:0003676///nucleic acid binding+++GO:0003677///DNA binding+++GO:0031625///ubiquitin protein ligase binding+++GO:0044212///transcription regulatory region DNA binding+++GO:0046872///metal ion binding+++[Biological Process]---GO…	cellular_component+++molecular_function+++biological_process	[Cellular Component]---organelle+++cell part+++cell+++[Molecular Function]---binding+++[Biological Process]---metabolic process+++regulation of biological process+++negative regulation of biological process+++cellular process+++biological regulation+++positive regulation of biological process
NM_001035346.1	DHDDS	mRNA	[Cellular Component]---GO:0005783///endoplasmic reticulum+++GO:1904423///dehydrodolichyl diphosphate synthase complex+++[Molecular Function]---GO:0002094///polyprenyltransferase activity+++GO:0016740///transferase activity+++GO:0016765///transferase activity, transferring alkyl or aryl (other than methyl) groups+++GO:0045547///dehydrodolichyl diphosphate synthase activity+++[Biological Process]--…	cellular_component+++molecular_function+++biological_process	[Cellular Component]---organelle+++cell part+++cell+++protein-containing complex+++[Molecular Function]---catalytic activity+++[Biological Process]---metabolic process+++cellular process
NM_001035349.1	ARID5A	mRNA	[Cellular Component]---GO:0005634///nucleus+++GO:0005654///nucleoplasm+++GO:0005730///nucleolus+++[Molecular Function]---GO:0001227///DNA-binding transcription repressor activity, RNA polymerase II-specific+++GO:0003677///DNA binding+++GO:0003714///transcription corepressor activity+++GO:0003723///RNA binding+++GO:0008134///transcription factor binding+++GO:0030331///estrogen receptor binding+++G…	cellular_component+++molecular_function+++biological_process	[Cellular Component]---organelle+++cell part+++cell+++membrane-enclosed lumen+++organelle part+++[Molecular Function]---transcription regulator activity+++binding+++[Biological Process]---metabolic process+++regulation of biological process+++negative regulation of biological process+++cellular process+++biological regulation+++immune system process+++response to stimulus
NM_001035352.1	PRUNE1	mRNA	[Cellular Component]---GO:0005634///nucleus+++GO:0005737///cytoplasm+++GO:0005829///cytosol+++GO:0005925///focal adhesion+++GO:0030054///cell junction+++[Molecular Function]---GO:0004309///exopolyphosphatase activity+++GO:0004427///inorganic diphosphatase activity+++GO:0015631///tubulin binding+++GO:0016462///pyrophosphatase activity+++GO:0016787///hydrolase activity+++GO:0016791///phosphatase ac…	cellular_component+++molecular_function+++biological_process	[Cellular Component]---organelle+++cell part+++cell+++cell junction+++[Molecular Function]---catalytic activity+++binding+++[Biological Process]---metabolic process+++cellular process+++regulation of biological process+++cellular component organization or biogenesis+++biological regulation+++developmental process+++multicellular organismal process
NM_001035353.2	PLVAP	mRNA	[Cellular Component]---GO:0005901///caveola+++GO:0009986///cell surface+++GO:0016020///membrane+++GO:0016021///integral component of membrane+++[Biological Process]---GO:0000165///MAPK cascade+++GO:0002693///positive regulation of cellular extravasation+++GO:0033209///tumor necrosis factor-mediated signaling pathway	cellular_component+++biological_process	[Cellular Component]---membrane+++cell part+++membrane part+++cell+++[Biological Process]---metabolic process+++regulation of biological process+++response to stimulus+++signaling+++cellular process+++biological regulation+++immune system process+++locomotion+++localization+++positive regulation of biological process
NM_001035354.1	GPD1	mRNA	[Cellular Component]---GO:0005737///cytoplasm+++GO:0005829///cytosol+++GO:0009331///glycerol-3-phosphate dehydrogenase complex+++[Molecular Function]---GO:0004367///glycerol-3-phosphate dehydrogenase [NAD+] activity+++GO:0004368///glycerol-3-phosphate dehydrogenase (quinone) activity+++GO:0016491///oxidoreductase activity+++GO:0016616///oxidoreductase activity, acting on the CH-OH group of donors…	cellular_component+++molecular_function+++biological_process	[Cellular Component]---cell part+++cell+++protein-containing complex+++[Molecular Function]---catalytic activity+++binding+++[Biological Process]---metabolic process+++cellular process+++regulation of biological process+++positive regulation of biological process+++biological regulation+++response to stimulus
NM_001035355.2	SYNJ2BP	mRNA	[Cellular Component]---GO:0005737///cytoplasm+++GO:0005739///mitochondrion+++GO:0005741///mitochondrial outer membrane+++GO:0008328///ionotropic glutamate receptor complex+++GO:0016020///membrane+++GO:0016021///integral component of membrane+++GO:0016323///basolateral plasma membrane+++GO:0030054///cell junction+++GO:0031594///neuromuscular junction+++GO:0043005///neuron projection+++GO:0048471//…	cellular_component+++biological_process	[Cellular Component]---cell part+++cell+++organelle+++membrane+++organelle part+++membrane part+++protein-containing complex+++cell junction+++synapse+++synapse part+++[Biological Process]---regulation of biological process+++cell proliferation+++negative regulation of biological process+++cellular process+++biological regulation+++localization+++response to stimulus+++signaling+++locomotion+++mu…
NM_001035357.2	CAMK2B	mRNA	[Cellular Component]---GO:0005737///cytoplasm+++GO:0005815///microtubule organizing center+++GO:0005856///cytoskeleton+++GO:0005954///calcium- and calmodulin-dependent protein kinase complex+++GO:0016020///membrane+++GO:0016529///sarcoplasmic reticulum+++GO:0030054///cell junction+++GO:0033017///sarcoplasmic reticulum membrane+++GO:0043005///neuron projection+++GO:0045202///synapse+++[Molecular F…	cellular_component+++molecular_function+++biological_process	[Cellular Component]---cell part+++cell+++organelle+++organelle part+++protein-containing complex+++membrane+++cell junction+++membrane part+++synapse+++[Molecular Function]---binding+++catalytic activity+++[Biological Process]---metabolic process+++cellular process+++developmental process+++multicellular organismal process+++regulation of biological process+++positive regulation of biological pr…
NM_001035358.1	MKNK1	mRNA	[Cellular Component]---GO:0005634///nucleus+++GO:0005654///nucleoplasm+++GO:0005737///cytoplasm+++[Molecular Function]---GO:0000166///nucleotide binding+++GO:0004672///protein kinase activity+++GO:0004674///protein serine/threonine kinase activity+++GO:0005516///calmodulin binding+++GO:0005524///ATP binding+++GO:0009931///calcium-dependent protein serine/threonine kinase activity+++GO:0016301///k…	cellular_component+++molecular_function+++biological_process	[Cellular Component]---organelle+++cell part+++cell+++membrane-enclosed lumen+++organelle part+++[Molecular Function]---binding+++catalytic activity+++[Biological Process]---metabolic process+++regulation of biological process+++cellular process+++biological regulation+++response to stimulus+++signaling
NM_001035361.1	RBMS1	mRNA	[Cellular Component]---GO:0005634///nucleus+++GO:0005829///cytosol+++GO:1990904///ribonucleoprotein complex+++[Molecular Function]---GO:0003676///nucleic acid binding+++GO:0003677///DNA binding+++GO:0003723///RNA binding+++[Biological Process]---GO:0006260///DNA replication	cellular_component+++molecular_function+++biological_process	[Cellular Component]---organelle+++cell part+++cell+++protein-containing complex+++[Molecular Function]---binding+++[Biological Process]---metabolic process+++cellular process
NM_001035362.1	TSPAN13	mRNA	[Cellular Component]---GO:0005886///plasma membrane+++GO:0016020///membrane+++GO:0016021///integral component of membrane+++[Molecular Function]---GO:0005246///calcium channel regulator activity+++[Biological Process]---GO:1903169///regulation of calcium ion transmembrane transport	cellular_component+++molecular_function+++biological_process	[Cellular Component]---membrane+++cell part+++cell+++membrane part+++[Molecular Function]---molecular function regulator+++[Biological Process]---regulation of biological process+++localization+++biological regulation
NM_001035363.1	FLCN	mRNA	[Cellular Component]---GO:0005634///nucleus+++GO:0005737///cytoplasm+++GO:0005764///lysosome+++GO:0005765///lysosomal membrane+++GO:0005813///centrosome+++GO:0005815///microtubule organizing center+++GO:0005819///spindle+++GO:0005829///cytosol+++GO:0005856///cytoskeleton+++GO:0005886///plasma membrane+++GO:0005929///cilium+++GO:0016020///membrane+++GO:0030496///midbody+++GO:0042995///cell project…	cellular_component+++molecular_function+++biological_process	[Cellular Component]---organelle+++cell part+++cell+++membrane+++organelle part+++cell junction+++[Molecular Function]---binding+++molecular function regulator+++[Biological Process]---metabolic process+++regulation of biological process+++negative regulation of biological process+++cellular process+++biological regulation+++developmental process+++multicellular organismal process+++positive regu…
NM_001035366.1	CTNNA1	mRNA	[Cellular Component]---GO:0005737///cytoplasm+++GO:0005856///cytoskeleton+++GO:0005886///plasma membrane+++GO:0005911///cell-cell junction+++GO:0005912///adherens junction+++GO:0005915///zonula adherens+++GO:0014704///intercalated disc+++GO:0015629///actin cytoskeleton+++GO:0016020///membrane+++GO:0016342///catenin complex+++GO:0016600///flotillin complex+++GO:0030027///lamellipodium+++GO:0030054…	cellular_component+++molecular_function+++biological_process	[Cellular Component]---cell part+++cell+++organelle+++membrane+++cell junction+++membrane part+++protein-containing complex+++[Molecular Function]---structural molecule activity+++binding+++[Biological Process]---biological adhesion+++cellular process+++developmental process+++regulation of biological process+++cell proliferation+++negative regulation of biological process+++multicellular organis…
NM_001035370.2	KLHDC8B	mRNA	[Cellular Component]---GO:0005737///cytoplasm+++GO:0005829///cytosol+++GO:0030496///midbody+++GO:0045171///intercellular bridge+++GO:0110070///cellularization cleavage furrow+++[Biological Process]---GO:0007049///cell cycle+++GO:0051301///cell division+++GO:0098813///nuclear chromosome segregation+++GO:0140014///mitotic nuclear division+++GO:1902410///mitotic cytokinetic process	cellular_component+++biological_process	[Cellular Component]---cell part+++cell+++extracellular region part+++extracellular region+++membrane+++membrane part+++[Biological Process]---cellular process+++cellular component organization or biogenesis
NM_001035373.2	ANXA9	mRNA	[Cellular Component]---GO:0005615///extracellular space+++GO:0005623///cell+++GO:0005634///nucleus+++GO:0005737///cytoplasm+++GO:0005829///cytosol+++GO:0005886///plasma membrane+++GO:0009986///cell surface+++GO:0031982///vesicle+++GO:0045202///synapse+++[Molecular Function]---GO:0001786///phosphatidylserine binding+++GO:0002020///protease binding+++GO:0005262///calcium channel activity+++GO:00055…	cellular_component+++molecular_function+++biological_process	[Cellular Component]---extracellular region part+++extracellular region+++cell+++organelle+++cell part+++membrane+++synapse+++[Molecular Function]---binding+++transporter activity+++molecular transducer activity+++molecular function regulator+++[Biological Process]---developmental process+++multicellular organismal process+++cellular process+++cellular component organization or biogenesis+++metab…
NM_001035381.2	SLC39A1	mRNA	[Cellular Component]---GO:0005886///plasma membrane+++GO:0016020///membrane+++GO:0016021///integral component of membrane+++[Molecular Function]---GO:0005385///zinc ion transmembrane transporter activity+++GO:0046873///metal ion transmembrane transporter activity+++[Biological Process]---GO:0001701///in utero embryonic development+++GO:0006811///ion transport+++GO:0006829///zinc ion transport+++G…	cellular_component+++molecular_function+++biological_process	[Cellular Component]---membrane+++cell part+++cell+++membrane part+++[Molecular Function]---transporter activity+++[Biological Process]---developmental process+++multicellular organismal process+++localization
NM_001035382.2	USH1C	mRNA	[Cellular Component]---GO:0001917///photoreceptor inner segment+++GO:0002141///stereocilia ankle link+++GO:0002142///stereocilia ankle link complex+++GO:0005737///cytoplasm+++GO:0005829///cytosol+++GO:0005856///cytoskeleton+++GO:0005886///plasma membrane+++GO:0005902///microvillus+++GO:0005903///brush border+++GO:0032391///photoreceptor connecting cilium+++GO:0032420///stereocilium+++GO:0032426//…	cellular_component+++molecular_function+++biological_process	[Cellular Component]---cell part+++cell+++protein-containing complex+++organelle+++membrane+++organelle part+++[Molecular Function]---binding+++[Biological Process]---cellular process+++multicellular organismal process+++developmental process+++regulation of biological process+++cellular component organization or biogenesis+++biological regulation+++localization
NM_001035383.1	PLEKHA2	mRNA	[Cellular Component]---GO:0005634///nucleus+++GO:0005737///cytoplasm+++GO:0005886///plasma membrane+++GO:0016020///membrane+++[Molecular Function]---GO:0008289///lipid binding+++GO:0030165///PDZ domain binding+++GO:0043325///phosphatidylinositol-3,4-bisphosphate binding	cellular_component+++molecular_function	[Cellular Component]---organelle+++cell part+++cell+++membrane+++[Molecular Function]---binding
NM_001035384.1	EPB41L5	mRNA	[Cellular Component]---GO:0005654///nucleoplasm+++GO:0005737///cytoplasm+++GO:0005829///cytosol+++GO:0005856///cytoskeleton+++GO:0005886///plasma membrane+++GO:0005912///adherens junction+++GO:0005925///focal adhesion+++GO:0030054///cell junction+++GO:0031252///cell leading edge+++GO:0032587///ruffle membrane+++[Molecular Function]---GO:0008092///cytoskeletal protein binding+++GO:0019904///protei…	cellular_component+++molecular_function+++biological_process	[Cellular Component]---membrane-enclosed lumen+++organelle+++cell part+++cell+++organelle part+++membrane+++cell junction+++membrane part+++[Molecular Function]---binding+++[Biological Process]---developmental process+++cellular process+++cellular component organization or biogenesis+++multicellular organismal process+++biological adhesion+++regulation of biological process+++positive regulation …
NM_001035386.2	CAT	mRNA	[Cellular Component]---GO:0005737///cytoplasm+++GO:0005739///mitochondrion+++GO:0005777///peroxisome+++GO:0005778///peroxisomal membrane+++GO:0016020///membrane+++GO:0016021///integral component of membrane+++GO:0032991///protein-containing complex+++GO:0043231///intracellular membrane-bounded organelle+++[Molecular Function]---GO:0000268///peroxisome targeting sequence binding+++GO:0004046///ami…	cellular_component+++molecular_function+++biological_process	[Cellular Component]---cell part+++cell+++organelle+++membrane+++organelle part+++membrane part+++protein-containing complex+++[Molecular Function]---binding+++catalytic activity+++antioxidant activity+++[Biological Process]---response to stimulus+++metabolic process+++cellular process+++regulation of biological process+++signaling+++positive regulation of biological process+++biological regulati…
NM_001035389.2	ING4	mRNA	[Cellular Component]---GO:0000123///histone acetyltransferase complex+++GO:0005634///nucleus+++GO:0005654///nucleoplasm+++GO:0005829///cytosol+++GO:0045111///intermediate filament cytoskeleton+++[Molecular Function]---GO:0003713///transcription coactivator activity+++GO:0035064///methylated histone binding+++GO:0046872///metal ion binding+++[Biological Process]---GO:0006260///DNA replication+++GO…	cellular_component+++molecular_function+++biological_process	[Cellular Component]---membrane-enclosed lumen+++organelle+++cell part+++protein-containing complex+++cell+++organelle part+++[Molecular Function]---transcription regulator activity+++binding+++[Biological Process]---metabolic process+++cellular process+++cellular component organization or biogenesis+++regulation of biological process+++signaling+++response to stimulus+++biological regulation+++n…
NM_001035391.2	RAB11B	mRNA	[Cellular Component]---GO:0005623///cell+++GO:0005768///endosome+++GO:0008021///synaptic vesicle+++GO:0012505///endomembrane system+++GO:0016020///membrane+++GO:0030054///cell junction+++GO:0030670///phagocytic vesicle membrane+++GO:0030672///synaptic vesicle membrane+++GO:0031410///cytoplasmic vesicle+++GO:0045202///synapse+++GO:0045335///phagocytic vesicle+++GO:0055037///recycling endosome+++GO…	cellular_component+++molecular_function+++biological_process	[Cellular Component]---cell+++organelle+++cell part+++synapse+++synapse part+++membrane+++cell junction+++organelle part+++[Molecular Function]---binding+++catalytic activity+++[Biological Process]---metabolic process+++regulation of biological process+++signaling+++cellular process+++biological regulation+++localization+++pigmentation+++response to stimulus
NM_001035392.2	PPP1R2	mRNA	[Molecular Function]---GO:0004864///protein phosphatase inhibitor activity+++[Biological Process]---GO:0005975///carbohydrate metabolic process+++GO:0005977///glycogen metabolic process+++GO:0009966///regulation of signal transduction+++GO:0032515///negative regulation of phosphoprotein phosphatase activity+++GO:0043666///regulation of phosphoprotein phosphatase activity	molecular_function+++biological_process	[Molecular Function]---molecular function regulator+++[Biological Process]---metabolic process+++cellular process+++regulation of biological process+++response to stimulus+++signaling+++biological regulation+++negative regulation of biological process
NM_001035393.2	ATP1B3	mRNA	[Cellular Component]---GO:0005623///cell+++GO:0005737///cytoplasm+++GO:0005886///plasma membrane+++GO:0005890///sodium:potassium-exchanging ATPase complex+++GO:0016020///membrane+++GO:0016021///integral component of membrane+++GO:0036126///sperm flagellum+++GO:0042470///melanosome+++[Molecular Function]---GO:0001671///ATPase activator activity+++GO:0005391///sodium:potassium-exchanging ATPase act…	cellular_component+++molecular_function+++biological_process	[Cellular Component]---cell+++cell part+++membrane+++membrane part+++protein-containing complex+++organelle+++[Molecular Function]---molecular function regulator+++catalytic activity+++transporter activity+++binding+++[Biological Process]---localization+++cellular process+++biological regulation+++regulation of biological process+++positive regulation of biological process
NM_001035397.2	EXOSC3	mRNA	[Cellular Component]---GO:0000176///nuclear exosome (RNase complex)+++GO:0000177///cytoplasmic exosome (RNase complex)+++GO:0000178///exosome (RNase complex)+++GO:0005634///nucleus+++GO:0005654///nucleoplasm+++GO:0005730///nucleolus+++GO:0005737///cytoplasm+++GO:0035327///transcriptionally active chromatin+++[Molecular Function]---GO:0003723///RNA binding+++[Biological Process]---GO:0000467///exo…	cellular_component+++molecular_function+++biological_process	[Cellular Component]---membrane-enclosed lumen+++organelle+++cell part+++protein-containing complex+++cell+++organelle part+++[Molecular Function]---binding+++[Biological Process]---metabolic process+++cellular process+++cellular component organization or biogenesis+++regulation of biological process+++negative regulation of biological process+++biological regulation+++developmental process+++imm…
NM_001035399.1	RABEPK	mRNA	[Cellular Component]---GO:0005737///cytoplasm+++GO:0005768///endosome+++GO:0010008///endosome membrane+++GO:0016020///membrane	cellular_component	[Cellular Component]---cell part+++cell+++organelle+++membrane+++organelle part
NM_001035402.2	BPGM	mRNA	[Molecular Function]---GO:0003824///catalytic activity+++GO:0004082///bisphosphoglycerate mutase activity+++GO:0004619///phosphoglycerate mutase activity+++GO:0016787///hydrolase activity+++GO:0016853///isomerase activity+++GO:0016868///intramolecular transferase activity, phosphotransferases+++[Biological Process]---GO:0006096///glycolytic process	molecular_function+++biological_process	[Molecular Function]---catalytic activity+++[Biological Process]---metabolic process+++cellular process
NM_001035408.1	GGA1	mRNA	[Cellular Component]---GO:0005654///nucleoplasm+++GO:0005769///early endosome+++GO:0005794///Golgi apparatus+++GO:0005829///cytosol+++GO:0032991///protein-containing complex+++GO:0043231///intracellular membrane-bounded organelle+++[Molecular Function]---GO:0030306///ADP-ribosylation factor binding+++[Biological Process]---GO:0006886///intracellular protein transport+++GO:0006893///Golgi to plasm…	cellular_component+++molecular_function+++biological_process	[Cellular Component]---membrane-enclosed lumen+++organelle+++cell part+++cell+++organelle part+++protein-containing complex+++[Molecular Function]---binding+++[Biological Process]---localization+++metabolic process+++regulation of biological process+++positive regulation of biological process+++biological regulation
NM_001035414.2	UBXN4	mRNA	[Cellular Component]---GO:0005634///nucleus+++GO:0005635///nuclear envelope+++GO:0005783///endoplasmic reticulum+++GO:0005789///endoplasmic reticulum membrane+++GO:0005829///cytosol+++GO:0016020///membrane+++[Biological Process]---GO:0006986///response to unfolded protein+++GO:0030433///ubiquitin-dependent ERAD pathway	cellular_component+++biological_process	[Cellular Component]---organelle+++cell part+++cell+++organelle part+++membrane+++membrane part+++[Biological Process]---response to stimulus+++metabolic process+++cellular process
NM_001035424.2	MYNN	mRNA	[Cellular Component]---GO:0005634///nucleus+++GO:0005654///nucleoplasm+++[Molecular Function]---GO:0000978///RNA polymerase II proximal promoter sequence-specific DNA binding+++GO:0003676///nucleic acid binding+++GO:0003677///DNA binding+++GO:0046872///metal ion binding+++[Biological Process]---GO:0006357///regulation of transcription by RNA polymerase II	cellular_component+++molecular_function+++biological_process	[Cellular Component]---organelle+++cell part+++cell+++membrane-enclosed lumen+++organelle part+++[Molecular Function]---binding+++[Biological Process]---metabolic process+++regulation of biological process+++cellular process+++biological regulation
NM_001035432.1	CNOT4	mRNA	[Cellular Component]---GO:0030014///CCR4-NOT complex+++[Molecular Function]---GO:0003676///nucleic acid binding+++GO:0003723///RNA binding+++GO:0004842///ubiquitin-protein transferase activity+++GO:0046872///metal ion binding+++[Biological Process]---GO:0006511///ubiquitin-dependent protein catabolic process+++GO:0016567///protein ubiquitination+++GO:0045652///regulation of megakaryocyte differen…	cellular_component+++molecular_function+++biological_process	[Cellular Component]---cell part+++protein-containing complex+++cell+++[Molecular Function]---binding+++catalytic activity+++[Biological Process]---metabolic process+++cellular process+++developmental process+++regulation of biological process+++immune system process+++multicellular organismal process+++biological regulation
NM_001035433.2	RPIA	mRNA	[Cellular Component]---GO:0043231///intracellular membrane-bounded organelle+++[Molecular Function]---GO:0004751///ribose-5-phosphate isomerase activity+++GO:0016853///isomerase activity+++GO:0042802///identical protein binding+++[Biological Process]---GO:0006014///D-ribose metabolic process+++GO:0006098///pentose-phosphate shunt+++GO:0009052///pentose-phosphate shunt, non-oxidative branch	cellular_component+++molecular_function+++biological_process	[Cellular Component]---organelle+++cell part+++cell+++[Molecular Function]---catalytic activity+++binding+++[Biological Process]---metabolic process+++cellular process
NM_001035434.1	HNMT	mRNA	[Cellular Component]---GO:0005654///nucleoplasm+++GO:0005737///cytoplasm+++GO:0005813///centrosome+++GO:0005829///cytosol+++[Molecular Function]---GO:0008168///methyltransferase activity+++GO:0008170///N-methyltransferase activity+++GO:0016740///transferase activity+++GO:0046539///histamine N-methyltransferase activity+++[Biological Process]---GO:0001695///histamine catabolic process+++GO:0032259…	cellular_component+++molecular_function+++biological_process	[Cellular Component]---membrane-enclosed lumen+++organelle+++cell part+++cell+++organelle part+++[Molecular Function]---catalytic activity+++[Biological Process]---metabolic process+++cellular process+++biological regulation
NM_001035436.2	LSM4	mRNA	[Cellular Component]---GO:0000932///P-body+++GO:0005634///nucleus+++GO:0005681///spliceosomal complex+++GO:0005688///U6 snRNP+++GO:0005829///cytosol+++GO:0016020///membrane+++GO:0032991///protein-containing complex+++GO:0046540///U4/U6 x U5 tri-snRNP complex+++GO:0071005///U2-type precatalytic spliceosome+++GO:0097526///spliceosomal tri-snRNP complex+++GO:0120115///Lsm2-8 complex+++[Molecular Fun…	cellular_component+++molecular_function+++biological_process	[Cellular Component]---organelle+++cell part+++protein-containing complex+++cell+++organelle part+++membrane+++[Molecular Function]---binding+++[Biological Process]---metabolic process+++cellular process+++cellular component organization or biogenesis+++regulation of biological process+++negative regulation of biological process+++biological regulation
NM_001035437.1	TMEM14C	mRNA	[Cellular Component]---GO:0005739///mitochondrion+++GO:0005743///mitochondrial inner membrane+++GO:0016020///membrane+++GO:0016021///integral component of membrane+++GO:0031966///mitochondrial membrane+++[Biological Process]---GO:0006783///heme biosynthetic process+++GO:0006839///mitochondrial transport+++GO:0030218///erythrocyte differentiation+++GO:0070453///regulation of heme biosynthetic proc…	cellular_component+++biological_process	[Cellular Component]---organelle+++cell part+++cell+++membrane+++organelle part+++membrane part+++[Biological Process]---metabolic process+++cellular process+++localization+++developmental process+++immune system process+++multicellular organismal process+++biological regulation+++regulation of biological process
NM_001035439.1	METTL7A	mRNA	[Cellular Component]---GO:0016021///integral component of membrane+++[Molecular Function]---GO:0008168///methyltransferase activity+++[Biological Process]---GO:0032259///methylation	cellular_component+++molecular_function+++biological_process	[Cellular Component]---membrane+++membrane part+++[Molecular Function]---catalytic activity+++[Biological Process]---metabolic process
NM_001035451.1	TMEM222	mRNA	[Cellular Component]---GO:0016020///membrane+++GO:0016021///integral component of membrane	cellular_component	[Cellular Component]---membrane+++membrane part
NM_001035455.1	PDLIM1	mRNA	[Cellular Component]---GO:0001725///stress fiber+++GO:0005667///transcription factor complex+++GO:0005737///cytoplasm+++GO:0005856///cytoskeleton+++GO:0005912///adherens junction+++GO:0030018///Z disc+++GO:0031941///filamentous actin+++[Molecular Function]---GO:0003713///transcription coactivator activity+++GO:0003779///actin binding+++GO:0046872///metal ion binding+++GO:0051371///muscle alpha-ac…	cellular_component+++molecular_function+++biological_process	[Cellular Component]---organelle+++cell part+++cell+++organelle part+++protein-containing complex+++cell junction+++supramolecular complex+++[Molecular Function]---transcription regulator activity+++binding+++[Biological Process]---metabolic process+++regulation of biological process+++cellular process+++biological regulation+++developmental process+++multicellular organismal process+++cellular c…
NM_001035457.3	PRSS35	mRNA	[Cellular Component]---GO:0005576///extracellular region	cellular_component	[Cellular Component]---extracellular region
NM_001035458.1	SUMO1	mRNA	[Cellular Component]---GO:0005634///nucleus+++GO:0005737///cytoplasm+++GO:0005886///plasma membrane+++GO:0008076///voltage-gated potassium channel complex+++GO:0016020///membrane+++GO:0016605///PML body+++GO:0016607///nuclear speck+++GO:0031965///nuclear membrane+++GO:0097165///nuclear stress granule+++[Molecular Function]---GO:0008134///transcription factor binding+++GO:0015459///potassium chann…	cellular_component+++molecular_function+++biological_process	[Cellular Component]---organelle+++cell part+++cell+++membrane+++membrane part+++protein-containing complex+++membrane-enclosed lumen+++organelle part+++[Molecular Function]---binding+++molecular function regulator+++protein tag+++[Biological Process]---metabolic process+++cellular process+++response to stimulus+++regulation of biological process+++negative regulation of biological process+++biol…
NM_001035464.1	EYA2	mRNA	[Cellular Component]---GO:0005634///nucleus+++GO:0005737///cytoplasm+++GO:0005739///mitochondrion+++GO:0005829///cytosol+++[Molecular Function]---GO:0000287///magnesium ion binding+++GO:0004721///phosphoprotein phosphatase activity+++GO:0004725///protein tyrosine phosphatase activity+++GO:0016787///hydrolase activity+++GO:0046872///metal ion binding+++[Biological Process]---GO:0006281///DNA repai…	cellular_component+++molecular_function+++biological_process	[Cellular Component]---organelle+++cell part+++cell+++[Molecular Function]---binding+++catalytic activity+++[Biological Process]---metabolic process+++response to stimulus+++cellular process+++cellular component organization or biogenesis+++developmental process+++multicellular organismal process+++regulation of biological process+++positive regulation of biological process+++biological regulatio…
NM_001035465.1	IRF5	mRNA	[Cellular Component]---GO:0005634///nucleus+++GO:0005737///cytoplasm+++[Molecular Function]---GO:0000976///transcription regulatory region sequence-specific DNA binding+++GO:0000981///DNA-binding transcription factor activity, RNA polymerase II-specific+++GO:0001228///DNA-binding transcription activator activity, RNA polymerase II-specific+++GO:0003677///DNA binding+++GO:0003700///DNA-binding tra…	cellular_component+++molecular_function+++biological_process	[Cellular Component]---organelle+++cell part+++cell+++[Molecular Function]---binding+++transcription regulator activity+++[Biological Process]---immune system process+++metabolic process+++regulation of biological process+++cellular process+++biological regulation+++response to stimulus+++signaling+++multi-organism process+++positive regulation of biological process
NM_001035468.2	ADI1	mRNA	[Cellular Component]---GO:0005634///nucleus+++GO:0005737///cytoplasm+++GO:0005886///plasma membrane+++GO:0016020///membrane+++[Molecular Function]---GO:0005506///iron ion binding+++GO:0010309///acireductone dioxygenase [iron(II)-requiring] activity+++GO:0016491///oxidoreductase activity+++GO:0046872///metal ion binding+++GO:0051213///dioxygenase activity+++[Biological Process]---GO:0006555///meth…	cellular_component+++molecular_function+++biological_process	[Cellular Component]---organelle+++cell part+++cell+++membrane+++[Molecular Function]---binding+++catalytic activity+++[Biological Process]---metabolic process+++cellular process
NM_001035472.1	CHMP2B	mRNA	[Cellular Component]---GO:0000815///ESCRT III complex+++GO:0005623///cell+++GO:0005737///cytoplasm+++GO:0005764///lysosome+++GO:0005768///endosome+++GO:0005770///late endosome+++GO:0005771///multivesicular body+++GO:0005829///cytosol+++GO:0005886///plasma membrane+++GO:0016020///membrane+++GO:0031902///late endosome membrane+++[Molecular Function]---GO:0019904///protein domain specific binding+++…	cellular_component+++molecular_function+++biological_process	[Cellular Component]---membrane+++organelle+++membrane part+++cell part+++protein-containing complex+++cell+++organelle part+++[Molecular Function]---binding+++[Biological Process]---cellular process+++cellular component organization or biogenesis+++localization+++regulation of biological process+++biological regulation+++multi-organism process+++multicellular organismal process+++locomotion+++po…
NM_001035475.1	CHCHD3	mRNA	[Cellular Component]---GO:0005634///nucleus+++GO:0005737///cytoplasm+++GO:0005739///mitochondrion+++GO:0005743///mitochondrial inner membrane+++GO:0016020///membrane+++GO:0061617///MICOS complex+++[Molecular Function]---GO:0001227///DNA-binding transcription repressor activity, RNA polymerase II-specific+++GO:0019902///phosphatase binding+++GO:0060090///molecular adaptor activity+++[Biological Pr…	cellular_component+++molecular_function+++biological_process	[Cellular Component]---organelle+++cell part+++cell+++membrane+++organelle part+++membrane part+++protein-containing complex+++[Molecular Function]---transcription regulator activity+++binding+++[Biological Process]---metabolic process+++regulation of biological process+++negative regulation of biological process+++cellular process+++biological regulation
NM_001035478.1	SSBP2	mRNA	[Cellular Component]---GO:0005634///nucleus+++[Molecular Function]---GO:0003697///single-stranded DNA binding+++[Biological Process]---GO:0045944///positive regulation of transcription by RNA polymerase II	cellular_component+++molecular_function+++biological_process	[Cellular Component]---organelle+++cell part+++cell+++[Molecular Function]---binding+++[Biological Process]---metabolic process+++regulation of biological process+++positive regulation of biological process+++cellular process+++biological regulation
NM_001035481.2	CHTOP	mRNA	[Cellular Component]---GO:0000346///transcription export complex+++GO:0005634///nucleus+++GO:0005654///nucleoplasm+++GO:0005730///nucleolus+++GO:0016607///nuclear speck+++GO:0036464///cytoplasmic ribonucleoprotein granule+++[Molecular Function]---GO:0003723///RNA binding+++GO:0008327///methyl-CpG binding+++[Biological Process]---GO:0001701///in utero embryonic development+++GO:0006406///mRNA expo…	cellular_component+++molecular_function+++biological_process	[Cellular Component]---organelle+++cell part+++protein-containing complex+++cell+++organelle part+++membrane-enclosed lumen+++[Molecular Function]---binding+++[Biological Process]---developmental process+++multicellular organismal process+++metabolic process+++localization+++regulation of biological process+++cell proliferation+++positive regulation of biological process+++cellular process+++biol…
NM_001035487.1	TSPAN3	mRNA	[Cellular Component]---GO:0005887///integral component of plasma membrane+++GO:0016020///membrane+++GO:0016021///integral component of membrane+++[Biological Process]---GO:0016477///cell migration	cellular_component+++biological_process	[Cellular Component]---membrane+++cell part+++membrane part+++cell+++[Biological Process]---locomotion+++localization+++cellular process
NM_001037319.1	SLC16A1	mRNA	[Cellular Component]---GO:0005886///plasma membrane+++GO:0005887///integral component of plasma membrane+++GO:0016020///membrane+++GO:0016021///integral component of membrane+++[Molecular Function]---GO:0008028///monocarboxylic acid transmembrane transporter activity+++GO:0015129///lactate transmembrane transporter activity+++GO:0015293///symporter activity+++GO:0022857///transmembrane transporte…	cellular_component+++molecular_function+++biological_process	[Cellular Component]---membrane+++cell part+++cell+++membrane part+++[Molecular Function]---transporter activity+++[Biological Process]---localization
NM_001037320.1	SORD	mRNA	[Cellular Component]---GO:0002197///xanthine dehydrogenase complex+++GO:0005576///extracellular region+++GO:0005615///extracellular space+++GO:0005737///cytoplasm+++GO:0005739///mitochondrion+++GO:0005777///peroxisome+++GO:0005829///cytosol+++GO:0005929///cilium+++GO:0016020///membrane+++GO:0016021///integral component of membrane+++GO:0016529///sarcoplasmic reticulum+++GO:0031514///motile cilium…	cellular_component+++molecular_function+++biological_process	[Cellular Component]---protein-containing complex+++extracellular region+++extracellular region part+++cell part+++cell+++organelle+++membrane+++membrane part+++organelle part+++[Molecular Function]---catalytic activity+++binding+++[Biological Process]---metabolic process+++regulation of biological process+++negative regulation of biological process+++cellular process+++biological regulation+++ce…
NM_001037444.2	HDAC1	mRNA	[Cellular Component]---GO:0000118///histone deacetylase complex+++GO:0000785///chromatin+++GO:0000790///nuclear chromatin+++GO:0000792///heterochromatin+++GO:0005634///nucleus+++GO:0005654///nucleoplasm+++GO:0005667///transcription factor complex+++GO:0005829///cytosol+++GO:0016580///Sin3 complex+++GO:0016581///NuRD complex+++GO:0017053///transcriptional repressor complex+++GO:0032991///protein-c…	cellular_component+++molecular_function+++biological_process	[Cellular Component]---membrane-enclosed lumen+++organelle+++cell part+++protein-containing complex+++cell+++organelle part+++[Molecular Function]---binding+++transcription regulator activity+++catalytic activity+++[Biological Process]---metabolic process+++regulation of biological process+++negative regulation of biological process+++cellular process+++biological regulation+++cellular component …
NM_001037446.2	CD59	mRNA	[Cellular Component]---GO:0005886///plasma membrane+++GO:0009986///cell surface+++[Molecular Function]---GO:0001848///complement binding+++[Biological Process]---GO:0001971///negative regulation of activation of membrane attack complex+++GO:0030449///regulation of complement activation	cellular_component+++molecular_function+++biological_process	[Cellular Component]---membrane+++cell part+++cell+++[Molecular Function]---binding+++[Biological Process]---metabolic process+++regulation of biological process+++immune system process+++negative regulation of biological process+++response to stimulus+++cellular process+++positive regulation of biological process+++biological regulation
NM_001037450.2	MRPL4	mRNA	[Cellular Component]---GO:0005739///mitochondrion+++GO:0005743///mitochondrial inner membrane+++GO:0005762///mitochondrial large ribosomal subunit+++GO:0005840///ribosome+++[Molecular Function]---GO:0003735///structural constituent of ribosome+++[Biological Process]---GO:0006412///translation	cellular_component+++molecular_function+++biological_process	[Cellular Component]---organelle+++cell part+++cell+++membrane+++organelle part+++membrane-enclosed lumen+++protein-containing complex+++[Molecular Function]---structural molecule activity+++[Biological Process]---metabolic process+++cellular process
NM_001037453.2	MRPL27	mRNA	[Cellular Component]---GO:0005739///mitochondrion+++GO:0005743///mitochondrial inner membrane+++GO:0005762///mitochondrial large ribosomal subunit+++GO:0005840///ribosome+++[Molecular Function]---GO:0003735///structural constituent of ribosome+++[Biological Process]---GO:0006412///translation	cellular_component+++molecular_function+++biological_process	[Cellular Component]---organelle+++cell part+++cell+++membrane+++organelle part+++membrane-enclosed lumen+++protein-containing complex+++[Molecular Function]---structural molecule activity+++[Biological Process]---metabolic process+++cellular process
NM_001037455.1	LMF2	mRNA	[Cellular Component]---GO:0005783///endoplasmic reticulum+++GO:0005789///endoplasmic reticulum membrane+++GO:0016020///membrane+++GO:0016021///integral component of membrane+++[Biological Process]---GO:0051604///protein maturation	cellular_component+++biological_process	[Cellular Component]---organelle+++cell part+++cell+++membrane+++membrane part+++organelle part+++[Biological Process]---metabolic process
NM_001037459.2	UBE2B	mRNA	[Cellular Component]---GO:0000790///nuclear chromatin+++GO:0005634///nucleus+++GO:0005886///plasma membrane+++GO:0016020///membrane+++GO:0033503///HULC complex+++[Molecular Function]---GO:0000166///nucleotide binding+++GO:0004842///ubiquitin-protein transferase activity+++GO:0005524///ATP binding+++GO:0016740///transferase activity+++GO:0061631///ubiquitin conjugating enzyme activity+++[Biologica…	cellular_component+++molecular_function+++biological_process	[Cellular Component]---membrane-enclosed lumen+++organelle+++cell part+++cell+++organelle part+++membrane+++protein-containing complex+++[Molecular Function]---binding+++catalytic activity+++[Biological Process]---metabolic process+++cellular process+++response to stimulus+++cellular component organization or biogenesis
NM_001037461.2	CSTB	mRNA	[Cellular Component]---GO:0005829///cytosol+++[Molecular Function]---GO:0004869///cysteine-type endopeptidase inhibitor activity+++[Biological Process]---GO:0010951///negative regulation of endopeptidase activity	cellular_component+++molecular_function+++biological_process	[Cellular Component]---cell part+++cell+++[Molecular Function]---molecular function regulator+++[Biological Process]---metabolic process+++regulation of biological process+++negative regulation of biological process+++cellular process+++biological regulation
NM_001037463.1	WWP1	mRNA	[Cellular Component]---GO:0005737///cytoplasm+++[Molecular Function]---GO:0004842///ubiquitin-protein transferase activity+++GO:0016740///transferase activity+++GO:0061630///ubiquitin protein ligase activity+++[Biological Process]---GO:0000209///protein polyubiquitination+++GO:0006511///ubiquitin-dependent protein catabolic process+++GO:0016567///protein ubiquitination+++GO:0043161///proteasome-m…	cellular_component+++molecular_function+++biological_process	[Cellular Component]---cell part+++cell+++[Molecular Function]---catalytic activity+++[Biological Process]---metabolic process+++cellular process+++regulation of biological process+++positive regulation of biological process+++biological regulation+++negative regulation of biological process
NM_001037465.2	SYK	mRNA	[Cellular Component]---GO:0005634///nucleus+++GO:0005737///cytoplasm+++GO:0019815///B cell receptor complex+++GO:0032009///early phagosome+++GO:0032991///protein-containing complex+++GO:0042101///T cell receptor complex+++[Molecular Function]---GO:0000166///nucleotide binding+++GO:0001784///phosphotyrosine residue binding+++GO:0004672///protein kinase activity+++GO:0004674///protein serine/threon…	cellular_component+++molecular_function+++biological_process	[Cellular Component]---organelle+++cell part+++cell+++membrane+++membrane part+++protein-containing complex+++[Molecular Function]---binding+++catalytic activity+++[Biological Process]---metabolic process+++regulation of biological process+++response to stimulus+++signaling+++positive regulation of biological process+++cellular process+++biological regulation+++localization+++developmental proces…
NM_001037468.1	CDC7	mRNA	[Cellular Component]---GO:0005634///nucleus+++GO:0005654///nucleoplasm+++GO:0005737///cytoplasm+++GO:0045171///intercellular bridge+++GO:0072686///mitotic spindle+++[Molecular Function]---GO:0004672///protein kinase activity+++GO:0004674///protein serine/threonine kinase activity+++GO:0005524///ATP binding+++GO:0016301///kinase activity+++[Biological Process]---GO:0000727///double-strand break re…	cellular_component+++molecular_function+++biological_process	[Cellular Component]---organelle+++cell part+++cell+++membrane-enclosed lumen+++organelle part+++extracellular region part+++extracellular region+++[Molecular Function]---catalytic activity+++binding+++[Biological Process]---metabolic process+++response to stimulus+++cellular process+++regulation of biological process+++cell proliferation+++positive regulation of biological process+++biological r…
NM_001037476.2	ZBTB16	mRNA	[Cellular Component]---GO:0005634///nucleus+++GO:0016604///nuclear body+++GO:0016605///PML body+++GO:0016607///nuclear speck+++GO:0017053///transcriptional repressor complex+++GO:0032991///protein-containing complex+++[Molecular Function]---GO:0000978///RNA polymerase II proximal promoter sequence-specific DNA binding+++GO:0001227///DNA-binding transcription repressor activity, RNA polymerase II-…	cellular_component+++molecular_function+++biological_process	[Cellular Component]---organelle+++cell part+++cell+++membrane-enclosed lumen+++organelle part+++protein-containing complex+++[Molecular Function]---binding+++transcription regulator activity+++[Biological Process]---metabolic process+++regulation of biological process+++negative regulation of biological process+++cellular process+++biological regulation+++developmental process+++multicellular or…
NM_001037478.3	ABCG2	mRNA	[Cellular Component]---GO:0005654///nucleoplasm+++GO:0005739///mitochondrion+++GO:0005886///plasma membrane+++GO:0016020///membrane+++GO:0016021///integral component of membrane+++GO:0016324///apical plasma membrane+++GO:0031526///brush border membrane+++GO:0031966///mitochondrial membrane+++GO:0045121///membrane raft+++[Molecular Function]---GO:0000166///nucleotide binding+++GO:0005524///ATP bin…	cellular_component+++molecular_function+++biological_process	[Cellular Component]---membrane-enclosed lumen+++organelle+++cell part+++cell+++organelle part+++membrane+++membrane part+++[Molecular Function]---binding+++catalytic activity+++transporter activity+++[Biological Process]---localization+++response to stimulus+++metabolic process+++cellular process+++multicellular organismal process+++detoxification
NM_001037488.2	CDCA7	mRNA	[Cellular Component]---GO:0005634///nucleus+++GO:0005654///nucleoplasm+++GO:0005737///cytoplasm+++GO:0005829///cytosol+++[Biological Process]---GO:0006355///regulation of transcription, DNA-templated+++GO:0006915///apoptotic process+++GO:0042127///regulation of cell proliferation	cellular_component+++biological_process	[Cellular Component]---organelle+++cell part+++cell+++membrane-enclosed lumen+++organelle part+++[Biological Process]---metabolic process+++regulation of biological process+++cellular process+++biological regulation+++cell proliferation
NM_001037489.3	SELENOK	mRNA	[Cellular Component]---GO:0005783///endoplasmic reticulum+++GO:0005789///endoplasmic reticulum membrane+++GO:0005794///Golgi apparatus+++GO:0005886///plasma membrane+++GO:0016020///membrane+++GO:0016021///integral component of membrane+++[Molecular Function]---GO:0042802///identical protein binding+++[Biological Process]---GO:0002230///positive regulation of defense response to virus by host+++GO…	cellular_component+++molecular_function+++biological_process	[Cellular Component]---organelle+++cell part+++cell+++membrane+++membrane part+++organelle part+++[Molecular Function]---binding+++[Biological Process]---regulation of biological process+++immune system process+++response to stimulus+++multi-organism process+++biological regulation+++localization+++developmental process+++cellular process+++metabolic process+++locomotion+++positive regulation of …
NM_001037597.1	NT5C3A	mRNA	[Cellular Component]---GO:0005737///cytoplasm+++[Molecular Function]---GO:0000166///nucleotide binding+++GO:0000287///magnesium ion binding+++GO:0008253///5'-nucleotidase activity+++GO:0016787///hydrolase activity+++GO:0016791///phosphatase activity+++[Biological Process]---GO:0009117///nucleotide metabolic process+++GO:0016311///dephosphorylation	cellular_component+++molecular_function+++biological_process	[Cellular Component]---cell part+++cell+++[Molecular Function]---binding+++catalytic activity+++[Biological Process]---metabolic process+++cellular process
NM_001037600.2	RMDN1	mRNA	[Cellular Component]---GO:0000922///spindle pole+++GO:0005737///cytoplasm+++GO:0005819///spindle+++GO:0005856///cytoskeleton+++GO:0005874///microtubule	cellular_component	[Cellular Component]---organelle+++cell part+++cell+++organelle part+++supramolecular complex
NM_001037603.1	PDZD11	mRNA	[Cellular Component]---GO:0005737///cytoplasm+++GO:0005829///cytosol+++GO:0005886///plasma membrane+++GO:0005911///cell-cell junction+++GO:0005912///adherens junction+++GO:0016020///membrane+++GO:0016323///basolateral plasma membrane+++GO:0030054///cell junction+++GO:0045202///synapse+++GO:0046930///pore complex+++GO:0098793///presynapse+++[Molecular Function]---GO:0008022///protein C-terminus bi…	cellular_component+++molecular_function+++biological_process	[Cellular Component]---cell part+++cell+++membrane+++cell junction+++membrane part+++synapse+++protein-containing complex+++synapse part+++[Molecular Function]---binding+++[Biological Process]---signaling+++localization+++cellular process+++biological regulation+++cellular component organization or biogenesis
NM_001037605.2	MRPS33	mRNA	[Cellular Component]---GO:0005739///mitochondrion+++GO:0005743///mitochondrial inner membrane+++GO:0005763///mitochondrial small ribosomal subunit+++GO:0005840///ribosome	cellular_component	[Cellular Component]---organelle+++cell part+++cell+++membrane+++organelle part+++membrane-enclosed lumen+++protein-containing complex
[truncated: 4,314 more rows]
