# Supplementary material for: The Difference of Milk-Derived Extracellular Vesicles from Cow Colostrum and Mature Milk on miRNAs Expression and Protecting Intestinal Epithelial Cells against Lipopolysaccharide Damage
Source: Int J Mol Sci. 2024 Mar 30;25(7):3880. doi: 10.3390/ijms25073880 (PMC11011493; doi:10.3390/ijms25073880)
Supplement: Supplementary file 1 [file ijms-25-03880-s001.zip › Table S5.xlsx]

## Sheet: 初乳和常乳0.05keeg富集通路
Table S5. KEGG enrichment analysis of the targeted genes of differentially expressed miRNAs in colostrum and mature milk exosomes.
KEGG Pathway Term ID	KEGG Pathway Term Desc	KEGG Pathway Term Level1	KEGG Pathway Term Level2	Term Candidate Gene Num	Total Candidate Gene Num	Term Gene Num	Total Gene Num	Rich Ratio	P value	Q value
10	Glycolysis / Gluconeogenesis	Metabolism	Carbohydrate metabolism	26	2187	128	24467	0.203125	5.69127e-05	0.0191557
3050	Proteasome	Genetic Information Processing	Folding, sorting and degradation	16	2187	67	24467	0.238806	0.000215365	0.0191557
4932	Non-alcoholic fatty liver disease (NAFLD)	Human Diseases	Endocrine and metabolic disease	54	2187	365	24467	0.147945	0.000165105	0.0191557
5012	Parkinson disease	Human Diseases	Neurodegenerative disease	42	2187	267	24467	0.157303	0.000226695	0.0191557
280	Valine, leucine and isoleucine degradation	Metabolism	Amino acid metabolism	23	2187	122	24467	0.188525	0.000463974	0.0261372
520	Amino sugar and nucleotide sugar metabolism	Metabolism	Carbohydrate metabolism	24	2187	129	24467	0.186047	0.000432521	0.0261372
52	Galactose metabolism	Metabolism	Carbohydrate metabolism	16	2187	81	24467	0.197531	0.00195141	0.0333845
1200	Carbon metabolism	Metabolism	Global and overview maps	41	2187	289	24467	0.141869	0.00212503	0.0333845
3013	RNA transport	Genetic Information Processing	Translation	61	2187	463	24467	0.131749	0.00142423	0.0333845
4066	HIF-1 signaling pathway	Environmental Information Processing	Signal transduction	46	2187	333	24467	0.138138	0.00204954	0.0333845
4080	Neuroactive ligand-receptor interaction	Environmental Information Processing	Signaling molecules and interaction	96	2187	786	24467	0.122137	0.00104405	0.0333845
4142	Lysosome	Cellular Processes	Transport and catabolism	47	2187	334	24467	0.140719	0.00125849	0.0333845
4146	Peroxisome	Cellular Processes	Transport and catabolism	38	2187	262	24467	0.145038	0.00204161	0.0333845
4213	Longevity regulating pathway - multiple species	Organismal Systems	Aging	29	2187	183	24467	0.15847	0.00175241	0.0333845
4610	Complement and coagulation cascades	Organismal Systems	Immune system	35	2187	222	24467	0.157658	0.000692189	0.0333845
4727	GABAergic synapse	Organismal Systems	Nervous system	37	2187	254	24467	0.145669	0.00214767	0.0333845
4918	Thyroid hormone synthesis	Organismal Systems	Endocrine system	30	2187	194	24467	0.154639	0.00217295	0.0333845
4926	Relaxin signaling pathway	Organismal Systems	Endocrine system	54	2187	399	24467	0.135338	0.00142574	0.0333845
5016	Huntington disease	Human Diseases	Neurodegenerative disease	59	2187	437	24467	0.135011	0.000939769	0.0333845
5030	Cocaine addiction	Human Diseases	Substance dependence	24	2187	142	24467	0.169014	0.00175012	0.0333845
5133	Pertussis	Human Diseases	Infectious disease: bacterial	34	2187	226	24467	0.150442	0.00185344	0.0333845
5418	Fluid shear stress and atherosclerosis	Human Diseases	Cardiovascular disease	58	2187	438	24467	0.13242	0.00163221	0.0333845
5205	Proteoglycans in cancer	Human Diseases	Cancer: overview	87	2187	726	24467	0.119835	0.0030005	0.0440943
51	Fructose and mannose metabolism	Metabolism	Carbohydrate metabolism	19	2187	108	24467	0.175926	0.00317451	0.0447076
500	Starch and sucrose metabolism	Metabolism	Carbohydrate metabolism	15	2187	78	24467	0.192308	0.00348569	0.0455331
5146	Amoebiasis	Human Diseases	Infectious disease: parasitic	42	2187	306	24467	0.137255	0.00350254	0.0455331
4916	Melanogenesis	Organismal Systems	Endocrine system	48	2187	365	24467	0.131507	0.00445011	0.0557088
4024	cAMP signaling pathway	Environmental Information Processing	Signal transduction	92	2187	789	24467	0.116603	0.00503112	0.0607328
4670	Leukocyte transendothelial migration	Organismal Systems	Immune system	45	2187	344	24467	0.130814	0.0063132	0.0735815
4915	Estrogen signaling pathway	Organismal Systems	Endocrine system	49	2187	387	24467	0.126615	0.00836437	0.0942386
630	Glyoxylate and dicarboxylate metabolism	Metabolism	Carbohydrate metabolism	13	2187	71	24467	0.183099	0.00956544	0.103125
5167	Kaposi sarcoma-associated herpesvirus infection	Human Diseases	Infectious disease: viral	67	2187	563	24467	0.119005	0.00976333	0.103125
4744	Phototransduction	Organismal Systems	Sensory system	10	2187	49	24467	0.204082	0.0103122	0.105622
62	Fatty acid elongation	Metabolism	Lipid metabolism	11	2187	58	24467	0.189655	0.0127142	0.107435
450	Selenocompound metabolism	Metabolism	Metabolism of other amino acids	9	2187	43	24467	0.209302	0.0123978	0.107435
650	Butanoate metabolism	Metabolism	Carbohydrate metabolism	11	2187	58	24467	0.189655	0.0127142	0.107435
4068	FoxO signaling pathway	Environmental Information Processing	Signal transduction	51	2187	415	24467	0.122892	0.0125536	0.107435
4211	Longevity regulating pathway	Organismal Systems	Aging	42	2187	330	24467	0.127273	0.0126979	0.107435
4950	Maturity onset diabetes of the young	Human Diseases	Endocrine and metabolic disease	10	2187	50	24467	0.2	0.0118838	0.107435
4978	Mineral absorption	Organismal Systems	Digestive system	23	2187	155	24467	0.148387	0.0108826	0.107435
4922	Glucagon signaling pathway	Organismal Systems	Endocrine system	44	2187	350	24467	0.125714	0.0134245	0.108036
5200	Pathways in cancer	Human Diseases	Cancer: overview	187	2187	1793	24467	0.104294	0.0132931	0.108036
4071	Sphingolipid signaling pathway	Environmental Information Processing	Signal transduction	55	2187	456	24467	0.120614	0.0139777	0.10885
4371	Apelin signaling pathway	Environmental Information Processing	Signal transduction	56	2187	466	24467	0.120172	0.0141699	0.10885
4151	PI3K-Akt signaling pathway	Environmental Information Processing	Signal transduction	116	2187	1068	24467	0.108614	0.0157842	0.111563
4218	Cellular senescence	Cellular Processes	Cell growth and death	59	2187	498	24467	0.118474	0.0158432	0.111563
4962	Vasopressin-regulated water reabsorption	Organismal Systems	Excretory system	21	2187	142	24467	0.147887	0.0150147	0.111563
5230	Central carbon metabolism in cancer	Human Diseases	Cancer: overview	30	2187	223	24467	0.134529	0.0157665	0.111563
5143	African trypanosomiasis	Human Diseases	Infectious disease: parasitic	14	2187	84	24467	0.166667	0.0164526	0.11349
20	Citrate cycle (TCA cycle)	Metabolism	Carbohydrate metabolism	11	2187	61	24467	0.180328	0.0182717	0.123516
830	Retinol metabolism	Metabolism	Metabolism of cofactors and vitamins	19	2187	128	24467	0.148438	0.019284	0.127804
5031	Amphetamine addiction	Human Diseases	Substance dependence	35	2187	275	24467	0.127273	0.0213562	0.138815
5163	Human cytomegalovirus infection	Human Diseases	Infectious disease: viral	79	2187	709	24467	0.111425	0.0242411	0.154594
5142	Chagas disease (American trypanosomiasis)	Human Diseases	Infectious disease: parasitic	41	2187	336	24467	0.122024	0.025684	0.160763
4060	Cytokine-cytokine receptor interaction	Environmental Information Processing	Signaling molecules and interaction	81	2187	734	24467	0.110354	0.0278588	0.171205
5020	Prion diseases	Human Diseases	Neurodegenerative disease	14	2187	90	24467	0.155556	0.0284969	0.171999
190	Oxidative phosphorylation	Metabolism	Energy metabolism	30	2187	235	24467	0.12766	0.0300764	0.175273
5134	Legionellosis	Human Diseases	Infectious disease: bacterial	19	2187	134	24467	0.141791	0.0296496	0.175273
5160	Hepatitis C	Human Diseases	Infectious disease: viral	49	2187	418	24467	0.117225	0.0305998	0.1753
4014	Ras signaling pathway	Environmental Information Processing	Signal transduction	89	2187	820	24467	0.108537	0.0317364	0.177557
4726	Serotonergic synapse	Organismal Systems	Nervous system	39	2187	322	24467	0.121118	0.0320444	0.177557
4940	Type I diabetes mellitus	Human Diseases	Endocrine and metabolic disease	19	2187	136	24467	0.139706	0.0338956	0.181852
5164	Influenza A	Human Diseases	Infectious disease: viral	52	2187	450	24467	0.115556	0.0334849	0.181852
561	Glycerolipid metabolism	Metabolism	Lipid metabolism	27	2187	210	24467	0.128571	0.0351886	0.182981
5170	Human immunodeficiency virus 1 infection	Human Diseases	Infectious disease: viral	71	2187	641	24467	0.110764	0.0349242	0.182981
4933	AGE-RAGE signaling pathway in diabetic complications	Human Diseases	Endocrine and metabolic disease	38	2187	315	24467	0.120635	0.035783	0.183252
4210	Apoptosis	Cellular Processes	Cell growth and death	54	2187	473	24467	0.114165	0.0373572	0.188459
4141	Protein processing in endoplasmic reticulum	Genetic Information Processing	Folding, sorting and degradation	53	2187	465	24467	0.113978	0.0398387	0.197019
4924	Renin secretion	Organismal Systems	Endocrine system	30	2187	241	24467	0.124481	0.0402199	0.197019
970	Aminoacyl-tRNA biosynthesis	Genetic Information Processing	Translation	17	2187	121	24467	0.140496	0.0411102	0.198503
4022	cGMP-PKG signaling pathway	Environmental Information Processing	Signal transduction	66	2187	597	24467	0.110553	0.0420665	0.20026
100	Steroid biosynthesis	Metabolism	Lipid metabolism	10	2187	61	24467	0.163934	0.0429618	0.201682
4550	Signaling pathways regulating pluripotency of stem cells	Cellular Processes	Cellular community - eukaryotes	54	2187	479	24467	0.112735	0.0454275	0.202897
4660	T cell receptor signaling pathway	Organismal Systems	Immune system	43	2187	370	24467	0.116216	0.0456218	0.202897
5165	Human papillomavirus infection	Human Diseases	Infectious disease: viral	115	2187	1103	24467	0.104261	0.0451411	0.202897
5214	Glioma	Human Diseases	Cancer: specific types	35	2187	291	24467	0.120275	0.0440178	0.202897
900	Terpenoid backbone biosynthesis	Metabolism	Metabolism of terpenoids and polyketides	9	2187	54	24467	0.166667	0.0486067	0.207963
4630	Jak-STAT signaling pathway	Environmental Information Processing	Signal transduction	56	2187	501	24467	0.111776	0.0483166	0.207963
4723	Retrograde endocannabinoid signaling	Organismal Systems	Nervous system	50	2187	441	24467	0.113379	0.0483269	0.207963
670	One carbon pool by folate	Metabolism	Metabolism of cofactors and vitamins	8	2187	47	24467	0.170213	0.054919	0.213909
4115	p53 signaling pathway	Cellular Processes	Cell growth and death	30	2187	248	24467	0.120968	0.0550595	0.213909
4152	AMPK signaling pathway	Environmental Information Processing	Signal transduction	53	2187	474	24467	0.111814	0.0531749	0.213909
4725	Cholinergic synapse	Organismal Systems	Nervous system	47	2187	413	24467	0.113801	0.051409	0.213909
4964	Proximal tubule bicarbonate reclamation	Organismal Systems	Excretory system	8	2187	47	24467	0.170213	0.054919	0.213909
5032	Morphine addiction	Human Diseases	Substance dependence	37	2187	315	24467	0.11746	0.0527547	0.213909
5110	Vibrio cholerae infection	Human Diseases	Infectious disease: bacterial	18	2187	134	24467	0.134328	0.0528735	0.213909
5130	Pathogenic Escherichia coli infection	Human Diseases	Infectious disease: bacterial	70	2187	645	24467	0.108527	0.0517052	0.213909
480	Glutathione metabolism	Metabolism	Metabolism of other amino acids	19	2187	145	24467	0.131034	0.0586673	0.224221
750	Vitamin B6 metabolism	Metabolism	Metabolism of cofactors and vitamins	4	2187	17	24467	0.235294	0.0590405	0.224221
5222	Small cell lung cancer	Human Diseases	Cancer: specific types	35	2187	299	24467	0.117057	0.060537	0.22735
4150	mTOR signaling pathway	Environmental Information Processing	Signal transduction	63	2187	581	24467	0.108434	0.0628976	0.23362
250	Alanine, aspartate and glutamate metabolism	Metabolism	Amino acid metabolism	14	2187	101	24467	0.138614	0.0654762	0.235044
534	Glycosaminoglycan biosynthesis - heparan sulfate / heparin	Metabolism	Glycan biosynthesis and metabolism	9	2187	57	24467	0.157895	0.0648989	0.235044
1230	Biosynthesis of amino acids	Metabolism	Global and overview maps	25	2187	204	24467	0.122549	0.0660283	0.235044
4110	Cell cycle	Cellular Processes	Cell growth and death	43	2187	381	24467	0.112861	0.0667533	0.235044
4931	Insulin resistance	Human Diseases	Endocrine and metabolic disease	44	2187	391	24467	0.112532	0.0667581	0.235044
4668	TNF signaling pathway	Environmental Information Processing	Signal transduction	41	2187	363	24467	0.112948	0.0712596	0.247952
5034	Alcoholism	Human Diseases	Substance dependence	52	2187	474	24467	0.109705	0.0718914	0.247952
4270	Vascular smooth muscle contraction	Organismal Systems	Circulatory system	49	2187	444	24467	0.11036	0.0726463	0.248025
4928	Parathyroid hormone synthesis, secretion and action	Organismal Systems	Endocrine system	44	2187	394	24467	0.111675	0.0734839	0.248376
514	Other types of O-glycan biosynthesis	Metabolism	Glycan biosynthesis and metabolism	17	2187	131	24467	0.129771	0.0759511	0.254173
4062	Chemokine signaling pathway	Organismal Systems	Immune system	67	2187	630	24467	0.106349	0.0772874	0.256109
510	N-Glycan biosynthesis	Metabolism	Glycan biosynthesis and metabolism	20	2187	160	24467	0.125	0.0789271	0.256513
3040	Spliceosome	Genetic Information Processing	Transcription	42	2187	376	24467	0.111702	0.0785095	0.256513
5323	Rheumatoid arthritis	Human Diseases	Immune disease	26	2187	218	24467	0.119266	0.0798569	0.257063
4728	Dopaminergic synapse	Organismal Systems	Nervous system	56	2187	520	24467	0.107692	0.0831776	0.265227
471	D-Glutamine and D-glutamate metabolism	Metabolism	Metabolism of other amino acids	3	2187	12	24467	0.25	0.0851773	0.269065
5219	Bladder cancer	Human Diseases	Cancer: specific types	16	2187	124	24467	0.129032	0.0865481	0.270864
230	Purine metabolism	Metabolism	Nucleotide metabolism	49	2187	453	24467	0.108168	0.0940037	0.283337
1210	2-Oxocarboxylic acid metabolism	Metabolism	Global and overview maps	6	2187	36	24467	0.166667	0.0975315	0.283337
3020	RNA polymerase	Genetic Information Processing	Transcription	9	2187	62	24467	0.145161	0.0989164	0.283337
4137	Mitophagy - animal	Cellular Processes	Transport and catabolism	32	2187	282	24467	0.113475	0.0961706	0.283337
4625	C-type lectin receptor signaling pathway	Organismal Systems	Immune system	40	2187	363	24467	0.110193	0.0981113	0.283337
4664	Fc epsilon RI signaling pathway	Organismal Systems	Immune system	26	2187	223	24467	0.116592	0.0978401	0.283337
4724	Glutamatergic synapse	Organismal Systems	Nervous system	40	2187	363	24467	0.110193	0.0981113	0.283337
4934	Cushing syndrome	Human Diseases	Endocrine and metabolic disease	61	2187	576	24467	0.105903	0.0935843	0.283337
5161	Hepatitis B	Human Diseases	Infectious disease: viral	57	2187	536	24467	0.106343	0.0964507	0.283337
5162	Measles	Human Diseases	Infectious disease: viral	50	2187	464	24467	0.107759	0.0960317	0.283337
5217	Basal cell carcinoma	Human Diseases	Cancer: specific types	26	2187	224	24467	0.116071	0.101729	0.288946
5033	Nicotine addiction	Human Diseases	Substance dependence	13	2187	99	24467	0.131313	0.102841	0.289669
5220	Chronic myeloid leukemia	Human Diseases	Cancer: specific types	29	2187	255	24467	0.113725	0.10656	0.297662
410	beta-Alanine metabolism	Metabolism	Metabolism of other amino acids	12	2187	91	24467	0.131868	0.111177	0.305512
4650	Natural killer cell mediated cytotoxicity	Organismal Systems	Immune system	40	2187	367	24467	0.108992	0.110558	0.305512
4973	Carbohydrate digestion and absorption	Organismal Systems	Digestive system	16	2187	130	24467	0.123077	0.118405	0.322749
4360	Axon guidance	Organismal Systems	Development and regeneration	79	2187	775	24467	0.101935	0.120033	0.323174
4923	Regulation of lipolysis in adipocytes	Organismal Systems	Endocrine system	21	2187	179	24467	0.117318	0.120473	0.323174
4140	Autophagy - animal	Cellular Processes	Transport and catabolism	58	2187	556	24467	0.104317	0.121641	0.323737
524	Neomycin, kanamycin and gentamicin biosynthesis	Metabolism	Biosynthesis of other secondary metabolites	2	2187	7	24467	0.285714	0.124013	0.327471
72	Synthesis and degradation of ketone bodies	Metabolism	Lipid metabolism	4	2187	22	24467	0.181818	0.127885	0.335077
620	Pyruvate metabolism	Metabolism	Carbohydrate metabolism	13	2187	103	24467	0.126214	0.129026	0.335467
4350	TGF-beta signaling pathway	Environmental Information Processing	Signal transduction	27	2187	241	24467	0.112033	0.131547	0.33684
4540	Gap junction	Cellular Processes	Cellular community - eukaryotes	29	2187	261	24467	0.111111	0.130954	0.33684
71	Fatty acid degradation	Metabolism	Lipid metabolism	15	2187	123	24467	0.121951	0.134643	0.342175
4920	Adipocytokine signaling pathway	Organismal Systems	Endocrine system	32	2187	293	24467	0.109215	0.137833	0.34767
130	Ubiquinone and other terpenoid-quinone biosynthesis	Metabolism	Metabolism of cofactors and vitamins	4	2187	23	24467	0.173913	0.144477	0.355074
740	Riboflavin metabolism	Metabolism	Metabolism of cofactors and vitamins	3	2187	15	24467	0.2	0.144665	0.355074
3420	Nucleotide excision repair	Genetic Information Processing	Replication and repair	14	2187	115	24467	0.121739	0.146021	0.355074
4130	SNARE interactions in vesicular transport	Genetic Information Processing	Folding, sorting and degradation	14	2187	115	24467	0.121739	0.146021	0.355074
4620	Toll-like receptor signaling pathway	Organismal Systems	Immune system	35	2187	325	24467	0.107692	0.143575	0.355074
5226	Gastric cancer	Human Diseases	Cancer: specific types	52	2187	502	24467	0.103586	0.147665	0.356505
5010	Alzheimer disease	Human Diseases	Neurodegenerative disease	45	2187	430	24467	0.104651	0.150695	0.36124
563	Glycosylphosphatidylinositol (GPI)-anchor biosynthesis	Metabolism	Glycan biosynthesis and metabolism	11	2187	87	24467	0.126437	0.152265	0.361655
4261	Adrenergic signaling in cardiomyocytes	Organismal Systems	Circulatory system	65	2187	640	24467	0.101562	0.153008	0.361655
5215	Prostate cancer	Human Diseases	Cancer: specific types	39	2187	369	24467	0.105691	0.155166	0.364209
1522	Endocrine resistance	Human Diseases	Drug resistance: antineoplastic	38	2187	359	24467	0.10585	0.156523	0.36486
1521	EGFR tyrosine kinase inhibitor resistance	Human Diseases	Drug resistance: antineoplastic	33	2187	308	24467	0.107143	0.158684	0.367365
640	Propanoate metabolism	Metabolism	Carbohydrate metabolism	12	2187	98	24467	0.122449	0.164093	0.372837
770	Pantothenate and CoA biosynthesis	Metabolism	Metabolism of cofactors and vitamins	8	2187	60	24467	0.133333	0.164357	0.372837
4721	Synaptic vesicle cycle	Organismal Systems	Nervous system	33	2187	309	24467	0.106796	0.163225	0.372837
1524	Platinum drug resistance	Human Diseases	Drug resistance: antineoplastic	26	2187	238	24467	0.109244	0.166474	0.375121
5223	Non-small cell lung cancer	Human Diseases	Cancer: specific types	23	2187	208	24467	0.110577	0.169023	0.378343
523	Polyketide sugar unit biosynthesis	Metabolism	Metabolism of terpenoids and polyketides	1	2187	2	24467	0.5	0.170785	0.379772
380	Tryptophan metabolism	Metabolism	Amino acid metabolism	12	2187	99	24467	0.121212	0.172542	0.381171
1040	Biosynthesis of unsaturated fatty acids	Metabolism	Lipid metabolism	8	2187	61	24467	0.131148	0.175366	0.384053
5218	Melanoma	Human Diseases	Cancer: specific types	26	2187	240	24467	0.108333	0.177255	0.384053
5231	Choline metabolism in cancer	Human Diseases	Cancer: overview	39	2187	374	24467	0.104278	0.176178	0.384053
3018	RNA degradation	Genetic Information Processing	Folding, sorting and degradation	27	2187	252	24467	0.107143	0.186864	0.397233
4072	Phospholipase D signaling pathway	Environmental Information Processing	Signal transduction	61	2187	608	24467	0.100329	0.186703	0.397233
5152	Tuberculosis	Human Diseases	Infectious disease: bacterial	63	2187	629	24467	0.100159	0.185979	0.397233
4921	Oxytocin signaling pathway	Organismal Systems	Endocrine system	58	2187	577	24467	0.10052	0.18952	0.400362
270	Cysteine and methionine metabolism	Metabolism	Amino acid metabolism	16	2187	142	24467	0.112676	0.199999	0.404608
430	Taurine and hypotaurine metabolism	Metabolism	Metabolism of other amino acids	5	2187	35	24467	0.142857	0.199211	0.404608
511	Other glycan degradation	Metabolism	Glycan biosynthesis and metabolism	6	2187	44	24467	0.136364	0.19636	0.404608
4720	Long-term potentiation	Organismal Systems	Nervous system	30	2187	285	24467	0.105263	0.19786	0.404608
4750	Inflammatory mediator regulation of TRP channels	Organismal Systems	Sensory system	41	2187	401	24467	0.102244	0.203364	0.404608
4912	GnRH signaling pathway	Organismal Systems	Endocrine system	37	2187	357	24467	0.103641	0.193621	0.404608
4971	Gastric acid secretion	Organismal Systems	Digestive system	28	2187	265	24467	0.10566	0.201817	0.404608
4976	Bile secretion	Organismal Systems	Digestive system	23	2187	213	24467	0.107981	0.198974	0.404608
5120	Epithelial cell signaling in Helicobacter pylori infection	Human Diseases	Infectious disease: bacterial	24	2187	224	24467	0.107143	0.203501	0.404608
5166	Human T-cell leukemia virus 1 infection	Human Diseases	Infectious disease: viral	70	2187	708	24467	0.0988701	0.201494	0.404608
4611	Platelet activation	Organismal Systems	Immune system	44	2187	433	24467	0.101617	0.205287	0.405772
4012	ErbB signaling pathway	Environmental Information Processing	Signal transduction	37	2187	360	24467	0.102778	0.208045	0.408832
4919	Thyroid hormone signaling pathway	Organismal Systems	Endocrine system	42	2187	413	24467	0.101695	0.210139	0.41056
30	Pentose phosphate pathway	Metabolism	Carbohydrate metabolism	10	2187	84	24467	0.119048	0.215985	0.412447
440	Phosphonate and phosphinate metabolism	Metabolism	Metabolism of other amino acids	3	2187	18	24467	0.166667	0.213818	0.412447
4714	Thermogenesis	Organismal Systems	Environmental adaptation	66	2187	669	24467	0.0986547	0.214668	0.412447
4930	Type II diabetes mellitus	Human Diseases	Endocrine and metabolic disease	21	2187	195	24467	0.107692	0.215437	0.412447
5132	Salmonella infection	Human Diseases	Infectious disease: bacterial	27	2187	258	24467	0.104651	0.221463	0.42053
591	Linoleic acid metabolism	Metabolism	Lipid metabolism	9	2187	75	24467	0.12	0.225153	0.423372
3060	Protein export	Genetic Information Processing	Folding, sorting and degradation	6	2187	46	24467	0.130435	0.225465	0.423372
4212	Longevity regulating pathway - worm	Organismal Systems	Aging	29	2187	280	24467	0.103571	0.228207	0.423814
4214	Apoptosis - fly	Cellular Processes	Cell growth and death	22	2187	207	24467	0.10628	0.226995	0.423814
565	Ether lipid metabolism	Metabolism	Lipid metabolism	16	2187	146	24467	0.109589	0.231946	0.428403
5014	Amyotrophic lateral sclerosis (ALS)	Human Diseases	Neurodegenerative disease	18	2187	167	24467	0.107784	0.236027	0.43357
920	Sulfur metabolism	Metabolism	Energy metabolism	4	2187	28	24467	0.142857	0.237667	0.434223
603	Glycosphingolipid biosynthesis - globo and isoglobo series	Metabolism	Glycan biosynthesis and metabolism	7	2187	57	24467	0.122807	0.245085	0.436897
604	Glycosphingolipid biosynthesis - ganglio series	Metabolism	Glycan biosynthesis and metabolism	7	2187	57	24467	0.122807	0.245085	0.436897
4217	Necroptosis	Cellular Processes	Cell growth and death	47	2187	473	24467	0.0993658	0.242519	0.436897
4910	Insulin signaling pathway	Organismal Systems	Endocrine system	49	2187	495	24467	0.0989899	0.245593	0.436897
5224	Breast cancer	Human Diseases	Cancer: specific types	50	2187	505	24467	0.0990099	0.242539	0.436897
910	Nitrogen metabolism	Metabolism	Energy metabolism	5	2187	38	24467	0.131579	0.249569	0.441103
1212	Fatty acid metabolism	Metabolism	Global and overview maps	18	2187	169	24467	0.106509	0.251761	0.441103
5206	MicroRNAs in cancer	Human Diseases	Cancer: overview	61	2187	625	24467	0.0976	0.251873	0.441103
5140	Leishmaniasis	Human Diseases	Infectious disease: parasitic	21	2187	201	24467	0.104478	0.258117	0.44971
4966	Collecting duct acid secretion	Organismal Systems	Excretory system	8	2187	68	24467	0.117647	0.260393	0.451348
4370	VEGF signaling pathway	Environmental Information Processing	Signal transduction	21	2187	202	24467	0.10396	0.265541	0.457922
5321	Inflammatory bowel disease (IBD)	Human Diseases	Immune disease	18	2187	172	24467	0.104651	0.276101	0.473716
4380	Osteoclast differentiation	Organismal Systems	Development and regeneration	46	2187	471	24467	0.0976645	0.284622	0.485869
220	Arginine biosynthesis	Metabolism	Amino acid metabolism	6	2187	50	24467	0.12	0.287252	0.487896
4927	Cortisol synthesis and secretion	Organismal Systems	Endocrine system	24	2187	238	24467	0.10084	0.297758	0.503211
340	Histidine metabolism	Metabolism	Amino acid metabolism	6	2187	51	24467	0.117647	0.303251	0.509945
4621	NOD-like receptor signaling pathway	Organismal Systems	Immune system	52	2187	540	24467	0.0962963	0.305747	0.511597
40	Pentose and glucuronate interconversions	Metabolism	Carbohydrate metabolism	8	2187	72	24467	0.111111	0.31368	0.519725
981	Insect hormone biosynthesis	Metabolism	Metabolism of terpenoids and polyketides	1	2187	4	24467	0.25	0.312413	0.519725
5212	Pancreatic cancer	Human Diseases	Cancer: specific types	29	2187	294	24467	0.0986395	0.316224	0.521384
4657	IL-17 signaling pathway	Organismal Systems	Immune system	25	2187	252	24467	0.0992063	0.32198	0.523217
4713	Circadian entrainment	Organismal Systems	Environmental adaptation	36	2187	370	24467	0.0972973	0.320935	0.523217
4972	Pancreatic secretion	Organismal Systems	Digestive system	28	2187	284	24467	0.0985915	0.321073	0.523217
240	Pyrimidine metabolism	Metabolism	Nucleotide metabolism	18	2187	178	24467	0.101124	0.327007	0.524375
601	Glycosphingolipid biosynthesis - lacto and neolacto series	Metabolism	Glycan biosynthesis and metabolism	13	2187	125	24467	0.104	0.325645	0.524375
4977	Vitamin digestion and absorption	Organismal Systems	Digestive system	8	2187	73	24467	0.109589	0.327347	0.524375
4136	Autophagy - other	Cellular Processes	Transport and catabolism	13	2187	126	24467	0.103175	0.336071	0.535811
564	Glycerophospholipid metabolism	Metabolism	Lipid metabolism	37	2187	384	24467	0.0963542	0.34003	0.537689
980	Metabolism of xenobiotics by cytochrome P450	Metabolism	Xenobiotics biodegradation and metabolism	14	2187	137	24467	0.10219	0.34043	0.537689
5332	Graft-versus-host disease	Human Diseases	Immune disease	10	2187	95	24467	0.105263	0.342521	0.538474
4742	Taste transduction	Organismal Systems	Sensory system	18	2187	180	24467	0.1	0.344501	0.53908
3320	PPAR signaling pathway	Organismal Systems	Endocrine system	28	2187	288	24467	0.0972222	0.348659	0.540582
5131	Shigellosis	Human Diseases	Infectious disease: bacterial	77	2187	822	24467	0.093674	0.348363	0.540582
531	Glycosaminoglycan degradation	Metabolism	Glycan biosynthesis and metabolism	6	2187	54	24467	0.111111	0.352046	0.540871
4810	Regulation of actin cytoskeleton	Cellular Processes	Cell motility	73	2187	779	24467	0.0937099	0.351897	0.540871
533	Glycosaminoglycan biosynthesis - keratan sulfate	Metabolism	Glycan biosynthesis and metabolism	8	2187	75	24467	0.106667	0.354959	0.542878
53	Ascorbate and aldarate metabolism	Metabolism	Carbohydrate metabolism	5	2187	44	24467	0.113636	0.357269	0.543543
4070	Phosphatidylinositol signaling system	Environmental Information Processing	Signal transduction	40	2187	420	24467	0.0952381	0.360218	0.543543
5330	Allograft rejection	Human Diseases	Immune disease	11	2187	107	24467	0.102804	0.359791	0.543543
592	alpha-Linolenic acid metabolism	Metabolism	Lipid metabolism	7	2187	66	24467	0.106061	0.376616	0.565761
590	Arachidonic acid metabolism	Metabolism	Lipid metabolism	18	2187	184	24467	0.0978261	0.380047	0.568389
4911	Insulin secretion	Organismal Systems	Endocrine system	36	2187	380	24467	0.0947368	0.382102	0.568945
5211	Renal cell carcinoma	Human Diseases	Cancer: specific types	25	2187	261	24467	0.0957854	0.388786	0.576358
4530	Tight junction	Cellular Processes	Cellular community - eukaryotes	65	2187	700	24467	0.0928571	0.391451	0.577775
3022	Basal transcription factors	Genetic Information Processing	Transcription	13	2187	132	24467	0.0984848	0.39977	0.587488
232	Caffeine metabolism	Metabolism	Biosynthesis of other secondary metabolites	2	2187	16	24467	0.125	0.425423	0.622481
261	Monobactam biosynthesis	Metabolism	Biosynthesis of other secondary metabolites	1	2187	6	24467	0.166667	0.429861	0.623575
780	Biotin metabolism	Metabolism	Metabolism of cofactors and vitamins	1	2187	6	24467	0.166667	0.429861	0.623575
310	Lysine degradation	Metabolism	Amino acid metabolism	20	2187	213	24467	0.0938967	0.443043	0.629507
4145	Phagosome	Cellular Processes	Transport and catabolism	40	2187	433	24467	0.0923788	0.437508	0.629507
4340	Hedgehog signaling pathway	Environmental Information Processing	Signal transduction	21	2187	224	24467	0.09375	0.442898	0.629507
5210	Colorectal cancer	Human Diseases	Cancer: specific types	34	2187	367	24467	0.0926431	0.439487	0.629507
5216	Thyroid cancer	Human Diseases	Cancer: specific types	17	2187	180	24467	0.0944444	0.443262	0.629507
4310	Wnt signaling pathway	Environmental Information Processing	Signal transduction	58	2187	635	24467	0.0913386	0.451297	0.633406
4975	Fat digestion and absorption	Organismal Systems	Digestive system	11	2187	115	24467	0.0956522	0.453504	0.633406
5225	Hepatocellular carcinoma	Human Diseases	Cancer: specific types	56	2187	613	24467	0.091354	0.452341	0.633406
5410	Hypertrophic cardiomyopathy (HCM)	Human Diseases	Cardiovascular disease	33	2187	358	24467	0.0921788	0.453076	0.633406
4013	MAPK signaling pathway - fly	Environmental Information Processing	Signal transduction	32	2187	349	24467	0.0916905	0.467078	0.64968
4010	MAPK signaling pathway	Environmental Information Processing	Signal transduction	103	2187	1143	24467	0.0901137	0.480685	0.660453
5202	Transcriptional misregulation in cancer	Human Diseases	Cancer: overview	59	2187	652	24467	0.0904908	0.480571	0.660453
5414	Dilated cardiomyopathy (DCM)	Human Diseases	Cardiovascular disease	34	2187	373	24467	0.0911528	0.478698	0.660453
4122	Sulfur relay system	Genetic Information Processing	Folding, sorting and degradation	2	2187	18	24467	0.111111	0.487192	0.666683
4015	Rap1 signaling pathway	Environmental Information Processing	Signal transduction	80	2187	889	24467	0.0899888	0.492202	0.670824
4622	RIG-I-like receptor signaling pathway	Organismal Systems	Immune system	22	2187	242	24467	0.0909091	0.499668	0.678264
4666	Fc gamma R-mediated phagocytosis	Organismal Systems	Immune system	31	2187	343	24467	0.090379	0.501952	0.67864
4512	ECM-receptor interaction	Environmental Information Processing	Signaling molecules and interaction	26	2187	288	24467	0.0902778	0.50902	0.685454
600	Sphingolipid metabolism	Metabolism	Lipid metabolism	17	2187	188	24467	0.0904255	0.517298	0.693836
4330	Notch signaling pathway	Environmental Information Processing	Signal transduction	17	2187	189	24467	0.0899471	0.526408	0.703265
260	Glycine, serine and threonine metabolism	Metabolism	Amino acid metabolism	9	2187	100	24467	0.09	0.54233	0.707751
4216	Ferroptosis	Cellular Processes	Cell growth and death	18	2187	202	24467	0.0891089	0.541618	0.707751
4390	Hippo signaling pathway	Environmental Information Processing	Signal transduction	51	2187	574	24467	0.0888502	0.539979	0.707751
4745	Phototransduction - fly	Organismal Systems	Sensory system	13	2187	145	24467	0.0896552	0.537885	0.707751
4914	Progesterone-mediated oocyte maturation	Organismal Systems	Endocrine system	32	2187	360	24467	0.0888889	0.540544	0.707751
4960	Aldosterone-regulated sodium reabsorption	Organismal Systems	Excretory system	12	2187	134	24467	0.0895522	0.54142	0.707751
4215	Apoptosis - multiple species	Cellular Processes	Cell growth and death	14	2187	157	24467	0.089172	0.544595	0.707974
4020	Calcium signaling pathway	Environmental Information Processing	Signal transduction	68	2187	767	24467	0.0886571	0.547712	0.709297
982	Drug metabolism - cytochrome P450	Metabolism	Xenobiotics biodegradation and metabolism	12	2187	135	24467	0.0888889	0.552097	0.712247
5169	Epstein-Barr virus infection	Human Diseases	Infectious disease: viral	57	2187	645	24467	0.0883721	0.557091	0.715958
4917	Prolactin signaling pathway	Organismal Systems	Endocrine system	25	2187	285	24467	0.0877193	0.570046	0.729831
5100	Bacterial invasion of epithelial cells	Human Diseases	Infectious disease: bacterial	29	2187	331	24467	0.0876133	0.573699	0.731737
3008	Ribosome biogenesis in eukaryotes	Genetic Information Processing	Translation	16	2187	184	24467	0.0869565	0.583984	0.742055
790	Folate biosynthesis	Metabolism	Metabolism of cofactors and vitamins	9	2187	104	24467	0.0865385	0.590779	0.745087
4974	Protein digestion and absorption	Organismal Systems	Digestive system	26	2187	299	24467	0.0869565	0.588705	0.745087
4658	Th1 and Th2 cell differentiation	Organismal Systems	Immune system	26	2187	300	24467	0.0866667	0.595721	0.745755
4979	Cholesterol metabolism	Organismal Systems	Digestive system	12	2187	139	24467	0.0863309	0.593826	0.745755
5145	Toxoplasmosis	Human Diseases	Infectious disease: parasitic	32	2187	369	24467	0.0867209	0.598642	0.746645
4925	Aldosterone synthesis and secretion	Organismal Systems	Endocrine system	35	2187	404	24467	0.0866337	0.603243	0.749618
290	Valine, leucine and isoleucine biosynthesis	Metabolism	Amino acid metabolism	1	2187	10	24467	0.1	0.608018	0.751818
730	Thiamine metabolism	Metabolism	Metabolism of cofactors and vitamins	4	2187	47	24467	0.0851064	0.615462	0.751818
3410	Base excision repair	Genetic Information Processing	Replication and repair	8	2187	95	24467	0.0842105	0.622807	0.751818
4614	Renin-angiotensin system	Organismal Systems	Endocrine system	5	2187	59	24467	0.0847458	0.616308	0.751818
4672	Intestinal immune network for IgA production	Organismal Systems	Immune system	11	2187	130	24467	0.0846154	0.620707	0.751818
4730	Long-term depression	Organismal Systems	Nervous system	16	2187	188	24467	0.0851064	0.61918	0.751818
5144	Malaria	Human Diseases	Infectious disease: parasitic	12	2187	141	24467	0.0851064	0.614025	0.751818
5310	Asthma	Human Diseases	Immune disease	5	2187	59	24467	0.0847458	0.616308	0.751818
4510	Focal adhesion	Cellular Processes	Cellular community - eukaryotes	63	2187	728	24467	0.0865385	0.627084	0.754286
3010	Ribosome	Genetic Information Processing	Translation	22	2187	260	24467	0.0846154	0.63862	0.754733
3015	mRNA surveillance pathway	Genetic Information Processing	Translation	25	2187	294	24467	0.085034	0.63372	0.754733
4144	Endocytosis	Cellular Processes	Transport and catabolism	84	2187	968	24467	0.0867769	0.631163	0.754733
4913	Ovarian steroidogenesis	Organismal Systems	Endocrine system	13	2187	155	24467	0.083871	0.636492	0.754733
5213	Endometrial cancer	Human Diseases	Cancer: specific types	21	2187	248	24467	0.0846774	0.635596	0.754733
4659	Th17 cell differentiation	Organismal Systems	Immune system	30	2187	353	24467	0.0849858	0.64215	0.75626
120	Primary bile acid biosynthesis	Metabolism	Lipid metabolism	4	2187	49	24467	0.0816327	0.64864	0.761252
350	Tyrosine metabolism	Metabolism	Amino acid metabolism	7	2187	86	24467	0.0813953	0.657775	0.768083
5204	Chemical carcinogenesis	Human Diseases	Cancer: overview	15	2187	181	24467	0.0828729	0.659006	0.768083
4722	Neurotrophin signaling pathway	Organismal Systems	Nervous system	46	2187	541	24467	0.0850277	0.662432	0.769423
562	Inositol phosphate metabolism	Metabolism	Carbohydrate metabolism	27	2187	323	24467	0.0835913	0.671744	0.777567
4662	B cell receptor signaling pathway	Organismal Systems	Immune system	25	2187	301	24467	0.0830565	0.680057	0.781868
4970	Salivary secretion	Organismal Systems	Digestive system	28	2187	336	24467	0.0833333	0.680087	0.781868
860	Porphyrin and chlorophyll metabolism	Metabolism	Metabolism of cofactors and vitamins	6	2187	76	24467	0.0789474	0.683884	0.782106
1523	Antifolate resistance	Human Diseases	Drug resistance: antineoplastic	12	2187	149	24467	0.0805369	0.689549	0.782106
4391	Hippo signaling pathway - fly	Environmental Information Processing	Signal transduction	22	2187	267	24467	0.082397	0.687401	0.782106
5221	Acute myeloid leukemia	Human Diseases	Cancer: specific types	22	2187	267	24467	0.082397	0.687401	0.782106
5150	Staphylococcus aureus infection	Human Diseases	Infectious disease: bacterial	14	2187	175	24467	0.08	0.707053	0.799277
512	Mucin type O-glycan biosynthesis	Metabolism	Glycan biosynthesis and metabolism	7	2187	91	24467	0.0769231	0.715015	0.802908
3430	Mismatch repair	Genetic Information Processing	Replication and repair	5	2187	66	24467	0.0757576	0.713921	0.802908
4612	Antigen processing and presentation	Organismal Systems	Immune system	16	2187	201	24467	0.079602	0.722718	0.808869
983	Drug metabolism - other enzymes	Metabolism	Xenobiotics biodegradation and metabolism	17	2187	214	24467	0.0794393	0.729981	0.814302
760	Nicotinate and nicotinamide metabolism	Metabolism	Metabolism of cofactors and vitamins	11	2187	143	24467	0.0769231	0.741653	0.821297
4320	Dorso-ventral axis formation	Organismal Systems	Development and regeneration	8	2187	106	24467	0.0754717	0.741392	0.821297
4961	Endocrine and other factor-regulated calcium reabsorption	Organismal Systems	Excretory system	19	2187	240	24467	0.0791667	0.743541	0.821297
140	Steroid hormone biosynthesis	Metabolism	Lipid metabolism	9	2187	120	24467	0.075	0.755625	0.822793
515	Mannose type O-glycan biosynthesis	Metabolism	Glycan biosynthesis and metabolism	7	2187	95	24467	0.0736842	0.755896	0.822793
4710	Circadian rhythm	Organismal Systems	Environmental adaptation	12	2187	156	24467	0.0769231	0.747822	0.822793
5322	Systemic lupus erythematosus	Human Diseases	Immune disease	20	2187	254	24467	0.0787402	0.755977	0.822793
5412	Arrhythmogenic right ventricular cardiomyopathy (ARVC)	Human Diseases	Cardiovascular disease	25	2187	314	24467	0.0796178	0.757067	0.822793
4114	Oocyte meiosis	Cellular Processes	Cell growth and death	37	2187	458	24467	0.080786	0.765407	0.829191
4064	NF-kappa B signaling pathway	Environmental Information Processing	Signal transduction	27	2187	344	24467	0.0784884	0.788153	0.851104
2010	ABC transporters	Environmental Information Processing	Membrane transport	14	2187	187	24467	0.0748663	0.79294	0.851977
5340	Primary immunodeficiency	Human Diseases	Immune disease	8	2187	112	24467	0.0714286	0.794002	0.851977
4260	Cardiac muscle contraction	Organismal Systems	Circulatory system	21	2187	275	24467	0.0763636	0.80535	0.861419
5416	Viral myocarditis	Human Diseases	Cardiovascular disease	16	2187	215	24467	0.0744186	0.812416	0.866235
4341	Hedgehog signaling pathway - fly	Environmental Information Processing	Signal transduction	11	2187	154	24467	0.0714286	0.82147	0.873135
3450	Non-homologous end-joining	Genetic Information Processing	Replication and repair	3	2187	49	24467	0.0612245	0.825927	0.875121
61	Fatty acid biosynthesis	Metabolism	Lipid metabolism	5	2187	77	24467	0.0649351	0.829249	0.875894
532	Glycosaminoglycan biosynthesis - chondroitin sulfate / dermatan sulfate	Metabolism	Glycan biosynthesis and metabolism	4	2187	64	24467	0.0625	0.835275	0.879511
4392	Hippo signaling pathway - multiple species	Environmental Information Processing	Signal transduction	7	2187	107	24467	0.0654206	0.852752	0.895124
4624	Toll and Imd signaling pathway	Organismal Systems	Immune system	13	2187	192	24467	0.0677083	0.885274	0.920685
4640	Hematopoietic cell lineage	Organismal Systems	Immune system	22	2187	305	24467	0.0721311	0.880142	0.920685
5320	Autoimmune thyroid disease	Human Diseases	Immune disease	8	2187	126	24467	0.0634921	0.885048	0.920685
330	Arginine and proline metabolism	Metabolism	Amino acid metabolism	8	2187	129	24467	0.0620155	0.899443	0.932551
3460	Fanconi anemia pathway	Genetic Information Processing	Replication and repair	11	2187	177	24467	0.0621469	0.926644	0.957816
3030	DNA replication	Genetic Information Processing	Replication and repair	5	2187	97	24467	0.0515464	0.941665	0.970375
4514	Cell adhesion molecules (CAMs)	Environmental Information Processing	Signaling molecules and interaction	37	2187	526	24467	0.0703422	0.951825	0.977863
5203	Viral carcinogenesis	Human Diseases	Cancer: overview	50	2187	694	24467	0.0720461	0.958032	0.981257
3440	Homologous recombination	Genetic Information Processing	Replication and repair	8	2187	156	24467	0.0512821	0.973206	0.993787
360	Phenylalanine metabolism	Metabolism	Amino acid metabolism	1	2187	55	24467	0.0181818	0.994235	1
4120	Ubiquitin mediated proteolysis	Genetic Information Processing	Folding, sorting and degradation	38	2187	582	24467	0.0652921	0.986619	1
4520	Adherens junction	Cellular Processes	Cellular community - eukaryotes	19	2187	423	24467	0.0449173	0.999854	1
4623	Cytosolic DNA-sensing pathway	Organismal Systems	Immune system	7	2187	163	24467	0.0429448	0.992411	1
4711	Circadian rhythm - fly	Organismal Systems	Environmental adaptation	2	2187	79	24467	0.0253165	0.994683	1
4740	Olfactory transduction	Organismal Systems	Sensory system	26	2187	1313	24467	0.019802	1	1
5168	Herpes simplex virus 1 infection	Human Diseases	Infectious disease: viral	76	2187	1287	24467	0.0590521	0.999986	1
