# Supplementary material for: The Difference of Milk-Derived Extracellular Vesicles from Cow Colostrum and Mature Milk on miRNAs Expression and Protecting Intestinal Epithelial Cells against Lipopolysaccharide Damage
Source: Int J Mol Sci. 2024 Mar 30;25(7):3880. doi: 10.3390/ijms25073880 (PMC11011493; doi:10.3390/ijms25073880)
Supplement: Supplementary file 1 [file ijms-25-03880-s001.zip › Table S6.xlsx]

## Sheet: Bcl2
Table S6. The raw date of genes and miRNA expression
Group	Ct value of Bcl2	Ct value of β-actin
Control	29.8657	19.1708
Control	30.9362	20.2914
Control	30.1105	19.054
Colostrum exosome	30.5366	19.5065
Colostrum exosome	29.9415	18.9072
Colostrum exosome	30.05	19.0866
Colostrum exosome +LPS	30.5682	19.3984
Colostrum exosome +LPS	29.3615	18.7914
Colostrum exosome +LPS	29.7584	19.2211
LPS	31.4749	19.604
LPS	31.7157	19.6759
LPS	31.6159	19.589
Mature milk exosomes	30.4296	19.6101
Mature milk exosomes	30.7028	19.7999
Mature milk exosomes	30.1934	19.5528
Mature milk exosomes +LPS	30.312	19.7681
Mature milk exosomes +LPS	30.1501	19.0625
Mature milk exosomes +LPS	30.1287	19.1846

## Sheet: Bax
Group	Ct value of Bax	Ct value of β-actin
Control	30.303	19.0792
Control	31.1787	19.7684
Control	30.2379	18.8827
Colostrum exosome	30.7482	18.8575
Colostrum exosome	30.4348	18.6184
Colostrum exosome	30.5463	18.5519
Colostrum exosome +LPS	30.4427	19.4033
Colostrum exosome +LPS	29.7414	18.5194
Colostrum exosome +LPS	29.6908	18.3468
LPS	30.5403	19.7948
LPS	30.1199	19.4489
LPS	30.2846	19.7021
Mature milk exosomes	30.215	18.6454
Mature milk exosomes	31.2673	19.3545
Mature milk exosomes	30.6354	19.0337
Mature milk exosomes +LPS	30.0986	19.2413
Mature milk exosomes +LPS	30.4417	19.0078
Mature milk exosomes +LPS	30.6106	18.9291

## Sheet: Caspase-3
Group	Ct value of caspase-3	Ct value of β-actin
Control	32.3698	20.3396
Control	32.6175	20.4828
Control	32.2927	20.1006
Colostrum exosome	32.9216	19.7351
Colostrum exosome	32.4229	19.2393
Colostrum exosome	32.7694	19.4822
Colostrum exosome +LPS	32.394	20.1011
Colostrum exosome +LPS	32.0562	19.1103
Colostrum exosome +LPS	32.1214	19.2965
LPS	31.5701	20.5962
LPS	31.069	20.0902
LPS	30.5822	20.0115
Mature milk exosomes	31.9014	19.4677
Mature milk exosomes	33.1874	19.5863
Mature milk exosomes	31.4242	18.9911
Mature milk exosomes +LPS	32.0919	19.4544
Mature milk exosomes +LPS	31.29	19.1846
Mature milk exosomes +LPS	31.2881	18.7538

## Sheet: p53
Group	Ct value of p53	Ct value of β-actin
Control	24.7874	22.5576
Control	23.8905	22.0252
Control	23.7736	21.8096
Colostrum exosome	24.1019	20.8737
Colostrum exosome	24.0301	20.9566
Colostrum exosome	24.1977	20.7851
Colostrum exosome +LPS	24.2689	21.2741
Colostrum exosome +LPS	24.5346	21.6643
Colostrum exosome +LPS	23.5039	21.1018
LPS	21.9942	21.3866
LPS	22.8207	21.5323
LPS	23.2529	21.8287
Mature milk exosomes	24.0241	21.2206
Mature milk exosomes	25.7958	22.8692
Mature milk exosomes	25.9819	23.5667
Mature milk exosomes +LPS	24.4092	21.8147
Mature milk exosomes +LPS	23.4428	21.1295
Mature milk exosomes +LPS	24.1493	21.4513

## Sheet: IL6
Group	Ct value of IL6	Ct value of β-actin
Control	26.3692	21.2795
Control	26.608	21.4911
Control	26.0303	20.5984
Colostrum exosome	27.4921	20.8774
Colostrum exosome	27.8392	20.5485
Colostrum exosome	26.205	20.5197
Colostrum exosome +LPS	26.7232	21.0499
Colostrum exosome +LPS	26.5293	20.1255
Colostrum exosome +LPS	26.892	20.6918
LPS	25.2786	20.8312
LPS	25.3825	21.0758
LPS	25.3269	20.9652
Mature milk exosomes	26.6261	20.9422
Mature milk exosomes	26.2975	20.8785
Mature milk exosomes	26.8024	20.9485
Mature milk exosomes +LPS	26.559	20.8922
Mature milk exosomes +LPS	26.3326	20.7582
Mature milk exosomes +LPS	26.1059	20.5496

## Sheet: IL1β
Group	Ct value of IL6	Ct value of β-actin
Control	33.5062	19.7102
Control	34.1008	19.8249
Control	33.1681	19.1068
Colostrum exosome	34.9696	19.7795
Colostrum exosome	33.6998	19.108
Colostrum exosome	33.8837	19.2378
Colostrum exosome +LPS	33.0315	19.1823
Colostrum exosome +LPS	32.8808	18.9477
Colostrum exosome +LPS	33.6505	19.5684
LPS	32.2647	19.7751
LPS	32.8142	19.875
LPS	32.3005	19.8215
Mature milk exosomes	34.3252	19.9816
Mature milk exosomes	34.4683	19.8769
Mature milk exosomes	34.097	19.7887
Mature milk exosomes +LPS	34.0536	19.8507
Mature milk exosomes +LPS	33.6375	19.6684
Mature milk exosomes +LPS	33.4608	19.3659

## Sheet: TNTα
Group	Ct value of TNTα	Ct value of β-actin
Control	28.902	21.0936
Control	28.6205	20.7409
Control	28.8419	20.8703
Colostrum exosome	30.9094	20.7743
Colostrum exosome	29.7965	20.2031
Colostrum exosome	29.1657	20.5278
Colostrum exosome +LPS	29.3425	21.1013
Colostrum exosome +LPS	29.2364	21.0494
Colostrum exosome +LPS	28.3904	20.6282
LPS	28.42	21.4051
LPS	28.3685	21.156
LPS	28.0484	20.8165
Mature milk exosomes	30.0243	21.4521
Mature milk exosomes	30.8258	21.9183
Mature milk exosomes	29.7487	21.3901
Mature milk exosomes +LPS	29.0849	20.9964
Mature milk exosomes +LPS	29.2643	20.6936
Mature milk exosomes +LPS	29.6063	21.5645

## Sheet: MUC2
Group	Ct value of MUC2	Ct value of β-actin
Control	30.0812	21.3395
Control	30.523	21.9958
Control	30.4447	21.7697
Colostrum exosome	29.6366	21.8015
Colostrum exosome	29.2269	21.553
Colostrum exosome	30.1756	22.2122
Colostrum exosome +LPS	29.6072	21.5834
Colostrum exosome +LPS	29.393	21.0604
Colostrum exosome +LPS	29.3493	21.3004
LPS	30.9397	20.4073
LPS	31.6144	21.2261
LPS	31.1557	21.0506
Mature milk exosomes	28.8919	21.2734
Mature milk exosomes	28.8976	21.8967
Mature milk exosomes	28.9162	21.4663
Mature milk exosomes +LPS	29.7323	21.8233
Mature milk exosomes +LPS	29.9622	21.3528
Mature milk exosomes +LPS	29.8501	21.7308

## Sheet: CDX2
Group	Ct value of CDX2	Ct value of β-actin
Control	28.0883	19.7308
Control	27.5812	19.196
Control	27.727	18.9158
Colostrum exosome	27.2601	19.4866
Colostrum exosome	27.5524	19.9216
Colostrum exosome	27.8027	19.9697
Colostrum exosome +LPS	27.8929	19.9789
Colostrum exosome +LPS	27.7	19.7612
Colostrum exosome +LPS	27.7459	19.6413
LPS	28.6156	19.6621
LPS	28.8362	19.9886
LPS	28.8118	19.7258
Mature milk exosomes	27.206	19.2463
Mature milk exosomes	27.9394	19.7049
Mature milk exosomes	27.4889	19.543
Mature milk exosomes +LPS	28.1307	19.7546
Mature milk exosomes +LPS	27.9043	19.309
Mature milk exosomes +LPS	27.7001	18.9862

## Sheet: IGF1R
Group	Ct value of IGF1R	Ct value of β-actin
Control	24.3589	19.3492
Control	24.6707	19.6297
Control	23.1604	18.2486
Colostrum exosome	22.946	19.1568
Colostrum exosome	21.8734	18.2474
Colostrum exosome	22.8129	18.6516
Colostrum exosome +LPS	23.5507	18.9188
Colostrum exosome +LPS	23.2808	18.3388
Colostrum exosome +LPS	23.0998	18.8895
LPS	25.9126	18.7617
LPS	25.5606	18.3775
LPS	25.2081	18.1195
Mature milk exosomes	22.0238	18.8957
Mature milk exosomes	22.3504	18.9478
Mature milk exosomes	22.145	19.0927
Mature milk exosomes +LPS	22.3348	18.9994
Mature milk exosomes +LPS	22.391	18.9376
Mature milk exosomes +LPS	21.9081	18.4321

[truncated: 4 more sheets: ZO1, Claudin-1, Occludin, miRNAs]
